# Supplementary material for: Molecular Heterogeneity in Breast Carcinoma Cells with Increased Invasive Capacities
Source: PubMed Central journal article supplement — Radiol Oncol. 2020 Feb 14;54(1):103–18. doi: 10.2478/raon-2020-0007 (PMC7087425; doi:10.2478/raon-2020-0007), 2020-02-14
Supplement: raon-54-103_sm.pdf [file raon-54-103_sm.pdf]

# Molecular heterogeneity in breast carcinoma cells with increased invasive capacities

Giulia Negro, Bertram Aschenbrenner, Simona Kranjc Brezar, Maja Cemazar, Andrej Coer, Gorana Gasljevic, Dragana Savic, Maxim Sorokin, Anton Buzdin, Maurizio Callari, Irma Kvitsaridze, Anahid Jewett, Mariela Vasileva-Slaveva, Ute Ganswindt, Ira Skvortsova, Sergej Skvortsov

doi: 10.2478/raon-2020-0007

SUPPLEMENTARY TABLE 1.

| Pathway                                                            | Tumour_MDA_MB.231_Invasive | Tumour_AU565_Invasive | Tumour_T47D_Invasive | Number of genes in PW | Mean (MDA_MB.231_T47D) |
|--------------------------------------------------------------------|----------------------------|-----------------------|----------------------|-----------------------|------------------------|
| 125-dihydroxyvitamin_Dsub3sub_biosynthesis                         | -0,108                     | 0,324                 | 0,002                | 3                     | -0,053                 |
| 1D-imyoi-inositol_hexakisphosphate_biosynthesis_II_mammalian       | -0,015                     | 0,080                 | -0,025               | 15                    | -0,020                 |
| 1D-imyoi-inositol_hexakisphosphate_biosynthesis_V_from_InsI34P3    | -0,035                     | -0,034                | -0,016               | 3                     | -0,026                 |
| 2-amino-3-carboxymuconate_semialdehyde_degradation_to_glutaryl-CoA | -0,053                     | -0,262                | 0,005                | 2                     | -0,024                 |
| 2-deoxy-alpha-D-ribose_1-phosphate_degradation                     | -0,064                     | 0,163                 | 0,012                | 6                     | -0,026                 |
| 2-oxobutanoate_degradation                                         | -0,095                     | 0,026                 | -0,076               | 8                     | -0,085                 |
| 2-oxoglutarate_decarboxylation_to_succinyl-CoA                     | -0,181                     | -0,112                | -0,014               | 3                     | -0,097                 |
| 2-oxoisovalerate_decarboxylation_to_isobutanoyl-CoA                | -0,103                     | -0,026                | -0,097               | 4                     | -0,100                 |
| 3-phosphoinositide_biosynthesis                                    | 0,013                      | -0,022                | 0,015                | 28                    | 0,014                  |
| 3-phosphoinositide_degradation                                     | 0,002                      | 0,033                 | -0,034               | 19                    | -0,016                 |
| 4-aminobutyrate_degradation                                        | -0,749                     | 0,684                 | 0,289                | 2                     | -0,230                 |
| 4-hydroxy-2-nonenal_detoxification                                 | 0,021                      | 0,089                 | -0,009               | 5                     | 0,006                  |
| 4-hydroxybenzoate_biosynthesis                                     | 0                          | 0                     | 0                    | 1                     | 0                      |
| 4-hydroxyproline_degradation                                       | -0,029                     | -0,032                | 0,025                | 4                     | -0,002                 |
| 5-aminoimidazole_ribonucleotide_biosynthesis                       | 0,026                      | 0,087                 | -0,045               | 3                     | -0,009                 |
| 7-3-amino-3-carboxypropyl-wyosine_biosynthesis                     | -0,265                     | 2,571                 | -0,216               | 2                     | -0,241                 |
| acetate_conversion_to_acetyl-CoA                                   | 0                          | 0                     | 0                    | 3                     | 0                      |
| acetone_degradation_I_to_methylglyoxal                             | -0,104                     | 0,071                 | -0,074               | 8                     | -0,089                 |
| acetyl-CoA_biosynthesis_from_citrate                               | 0,086                      | -0,208                | 0,093                | 1                     | 0,090                  |
| acyl_carrier_protein_metabolism                                    | 0,272                      | 0,150                 | 0,016                | 1                     | 0,144                  |
| acyl-CoA_hydrolysis                                                | -0,070                     | -0,139                | 0,034                | 3                     | -0,018                 |
| adenine_and_adenosine_salvage_I                                    | 0,130                      | 0,302                 | -0,107               | 1                     | 0,011                  |
| adenine_and_adenosine_salvage_II                                   | -0,050                     | 0,418                 | -0,161               | 1                     | -0,106                 |
| adenine_and_adenosine_salvage_III                                  | -0,007                     | 0,077                 | 0,061                | 3                     | 0,027                  |
| adenosine_deoxyribonucleotides_ide_novoi_biosynthesis              | -0,015                     | -0,016                | -0,043               | 11                    | -0,029                 |
| adenosine_nucleotides_degradation                                  | -0,019                     | 0,100                 | 0,015                | 8                     | -0,002                 |
| adenosine_ribonucleotides_ide_novoi_biosynthesis                   | -0,020                     | 0,141                 | -0,025               | 24                    | -0,023                 |
| AHR_Pathway                                                        | -0,186                     | 0,219                 | -0,186               | 27                    | -0,186                 |
| AHR_Pathway_Cath_D_expression_via_SP1                              | -0,314                     | 0,352                 | -0,314               | 15                    | -0,314                 |
| AHR_Pathway_C-myc_expression_via_RELA                              | -0,316                     | 0,331                 | -0,304               | 15                    | -0,310                 |
| AHR_Pathway_CYP1A1_CYP1B1_CYP1A2_AHRR_gene_expression_via_POLR2B   | -0,013                     | 0,022                 | -0,024               | 5                     | -0,018                 |
| AHR_Pathway_PS2_Gene_expression_via_ESR1                           | -0,342                     | 0,351                 | -0,326               | 15                    | -0,334                 |
| Akt_Pathway_Regulation_by_GH                                       | -0,106                     | 0,022                 | 0,024                | 41                    | -0,041                 |
| Akt_Signaling_Pathway                                              | -0,014                     | -0,015                | 0,006                | 651                   | -0,004                 |
| Akt_Signaling_Pathway_Acetylation_of_proteins                      | 0,036                      | -0,121                | 0,034                | 18                    | 0,035                  |
| Akt_Signaling_Pathway_Aggregation_and_Neurodegeneration            | 0,018                      | -0,054                | 0,011                | 22                    | 0,014                  |
| Akt_Signaling_Pathway_Apoptosis                                    | 0,031                      | -0,117                | 0,025                | 18                    | 0,028                  |
| Akt_Signaling_Pathway_AR_mediated_apoptosis                        | 0,031                      | -0,117                | 0,025                | 18                    | 0,028                  |
| Akt_Signaling_Pathway_Blocks_Apoptosis                             | 0,029                      | -0,105                | 0,029                | 18                    | 0,029                  |
| Akt_Signaling_Pathway_Blood_cell_differentiation                   | 0,031                      | -0,117                | 0,025                | 18                    | 0,028                  |
| Akt_Signaling_Pathway_Cell_Cycle                                   | 0,011                      | -0,041                | 0,015                | 4                     | 0,013                  |
| Akt_Signaling_Pathway_Cell_Cycle_Progression                       | 0,030                      | -0,110                | 0,024                | 19                    | 0,027                  |
| Akt_Signaling_Pathway_Cell_Survival                                | 0,024                      | -0,024                | 0,003                | 29                    | 0,013                  |
| Akt_Signaling_Pathway_Elevation_of_Glucose_Import                  | 0,031                      | -0,117                | 0,025                | 18                    | 0,028                  |
| Akt_Signaling_Pathway_Enhancement_of_Breast_Epithelial             | 0,031                      | -0,117                | 0,025                | 18                    | 0,028                  |
| Akt_Signaling_Pathway_ERK_mediated_apoptosis                       | 0,031                      | -0,117                | 0,025                | 18                    | 0,028                  |
| Akt_Signaling_Pathway_Genetic_Stability                            | 0,033                      | -0,100                | 0,023                | 18                    | 0,028                  |
| Akt_Signaling_Pathway_Glucose_Uptake                               | -0,061                     | 0,464                 | -0,057               | 3                     | -0,059                 |
| Akt_Signaling_Pathway_Glycogen_Synthesis_and_Apoptosis             | 0,028                      | -0,104                | 0,022                | 19                    | 0,025                  |

| Pathway                                                                                                                 | Tumour_MDA_MB.231_Invasive | Tumour_AU565_Invasive | Tumour_T47D_Invasive | Number of genes in PW | Mean (MDA_MB.231_T47D) |
|-------------------------------------------------------------------------------------------------------------------------|----------------------------|-----------------------|----------------------|-----------------------|------------------------|
| Akt_Signaling_Pathway_Increased_GLUT4_translocation                                                                     | 0,031                      | -0,117                | 0,025                | 18                    | 0,028                  |
| Akt_Signaling_Pathway_Induction_of_Chromatin_Condensation                                                               | 0,030                      | -0,106                | 0,021                | 18                    | 0,026                  |
| Akt_Signaling_Pathway_JNK_mediated_apoptosis                                                                            | 0,030                      | -0,110                | 0,024                | 19                    | 0,027                  |
| Akt_Signaling_Pathway_Neuroprotection                                                                                   | 0,028                      | -0,080                | 0,017                | 20                    | 0,023                  |
| Akt_Signaling_Pathway_NFAT_degradation                                                                                  | 0,013                      | -0,043                | 0,015                | 34                    | 0,014                  |
| Akt_Signaling_Pathway_NF-kB_dependent_transcription                                                                     | 0,031                      | -0,117                | 0,025                | 18                    | 0,028                  |
| Akt_Signaling_Pathway_NF-kB_pathway                                                                                     | 0,027                      | -0,126                | 0,035                | 20                    | 0,031                  |
| Akt_Signaling_Pathway_NO_production                                                                                     | 0,031                      | -0,117                | 0,025                | 18                    | 0,028                  |
| Akt_Signaling_Pathway_p73_mediated_apoptosis                                                                            | 0,036                      | -0,123                | 0,026                | 18                    | 0,031                  |
| Akt_Signaling_Pathway_Promotes_Adipogenesis                                                                             | 0,031                      | -0,117                | 0,025                | 18                    | 0,028                  |
| Akt_Signaling_Pathway_Protein_Synthesis                                                                                 | 0,012                      | -0,056                | 0,021                | 25                    | 0,017                  |
| Akt_Signaling_Pathway_Proto-Oncogenic_and_RTK-signaling                                                                 | 0,031                      | -0,117                | 0,025                | 18                    | 0,028                  |
| Akt_Signaling_Pathway_Regulation_of_Cyclic_Nucleotide                                                                   | 0,031                      | -0,117                | 0,025                | 18                    | 0,028                  |
| Akt_Signaling_Pathway_Regulation_of_Na+_Transport                                                                       | 0,026                      | -0,078                | 0,020                | 3                     | 0,023                  |
| Akt_Signaling_Pathway_Splicing_Regulation                                                                               | 0,016                      | -0,033                | 0,005                | 5                     | 0,010                  |
| Akt_Signaling_Pathway_Survival_Genes                                                                                    | 0,020                      | -0,085                | 0,020                | 21                    | 0,020                  |
| Akt_Signaling_Pathway_Synaptic_Transmission                                                                             | 0,018                      | -0,066                | 0,014                | 32                    | 0,016                  |
| Akt_Signaling_Pathway_Translation                                                                                       | -0,676                     | 0,006                 | 0,078                | 7                     | -0,299                 |
| Akt_Signaling_Pathway_Tumor_Suppression                                                                                 | 0,031                      | -0,117                | 0,025                | 18                    | 0,028                  |
| alanine_biosynthesisdegradation                                                                                         | 0                          | 0                     | 0                    | 2                     | 0                      |
| allopregnanolone_biosynthesis                                                                                           | 0                          | 0                     | 0                    | 6                     | 0                      |
| alpha-tocopherol_degradation                                                                                            | 0                          | 0                     | 0                    | 1                     | 0                      |
| anandamide_degradation                                                                                                  | 0                          | 0                     | 0                    | 2                     | 0                      |
| androgen_biosynthesis                                                                                                   | -0,039                     | 0,066                 | -0,033               | 7                     | -0,036                 |
| Angiotensin-PTK2B_Pathway                                                                                               | -0,018                     | 0,063                 | 0,034                | 13                    | 0,008                  |
| arsenate_detoxification_I_glutaredoxin                                                                                  | 0,012                      | -0,005                | 0,018                | 3                     | 0,015                  |
| ascorbate_recycling_cytosolic                                                                                           | -0,131                     | 0,216                 | -0,028               | 2                     | -0,079                 |
| asparagine_biosynthesis                                                                                                 | 0,011                      | 0,077                 | -0,117               | 2                     | -0,053                 |
| asparagine_degradation                                                                                                  | 0,043                      | 0,009                 | -0,036               | 4                     | 0,003                  |
| aspartate_biosynthesis                                                                                                  | 0                          | 0                     | 0                    | 2                     | 0                      |
| aspirin_triggered_resolvin_D_biosynthesis                                                                               | 0                          | 0                     | 0                    | 2                     | 0                      |
| aspirin_triggered_resolvin_E_biosynthesis                                                                               | 0                          | 0                     | 0                    | 2                     | 0                      |
| aspirin-triggered_lipoxin_biosynthesis                                                                                  | 0                          | 0                     | 0                    | 2                     | 0                      |
| ATM_Pathway                                                                                                             | 0,015                      | -0,031                | 0,022                | 47                    | 0,018                  |
| ATM_Pathway_Apoptosis                                                                                                   | -0,013                     | 0,141                 | -0,048               | 3                     | -0,030                 |
| ATM_Pathway_Apoptosis_and_Senescence                                                                                    | 0,053                      | 0,016                 | 0,020                | 6                     | 0,037                  |
| ATM_Pathway_Cell_Cycle_Checkpoint_Control                                                                               | 0,072                      | 0,142                 | -0,007               | 4                     | 0,032                  |
| ATM_Pathway_Cell_Survival                                                                                               | 0,013                      | 0,079                 | -0,004               | 14                    | 0,004                  |
| ATM_Pathway_Checkpoint_Activation                                                                                       | 0,069                      | 0,095                 | -0,032               | 4                     | 0,019                  |
| ATM_Pathway_DNA_repair                                                                                                  | 0,007                      | 0,075                 | 0,004                | 9                     | 0,005                  |
| ATM_Pathway_G2_M_Checkpoint_Arrest                                                                                      | -0,024                     | 0,018                 | 0,011                | 12                    | -0,007                 |
| ATM_Pathway_G2-Mitosis_progression                                                                                      | -0,024                     | 0,018                 | 0,011                | 12                    | -0,007                 |
| ATM_Pathway_NF-kB_Pathway                                                                                               | 0,069                      | 0,095                 | -0,032               | 4                     | 0,019                  |
| ATM_Pathway_Repair_and_Recombination                                                                                    | 0,101                      | 0,110                 | -0,115               | 3                     | -0,007                 |
| ATM_Pathway_S-phase_arrest                                                                                              | 0,069                      | 0,050                 | -0,047               | 4                     | 0,011                  |
| ATM_Pathway_S-phase_progression                                                                                         | 0,008                      | -0,018                | -0,004               | 6                     | 0,002                  |
| ATM_Pathway_Synaptic_Vesicle_Transport                                                                                  | 0,234                      | -0,389                | 0,151                | 4                     | 0,192                  |
| Base_Excision_Repair_Pathway                                                                                            | -0,018                     | -0,002                | 0,015                | 20                    | -0,001                 |
| beta-alanine_degradation                                                                                                | -0,113                     | 0,081                 | -0,112               | 2                     | -0,113                 |
| bile_acid_biosynthesis_neutral_pathway                                                                                  | -0,063                     | 0,094                 | -0,032               | 15                    | -0,047                 |
| biocarta_U_00DF_arrestins_in_gpcr_desensitization_Main_Pathway                                                          | -0,047                     | -0,027                | 0,008                | 26                    | -0,020                 |
| biocarta_acetylation_and_deacetylation_of_rela_in_nucleus_Main_Pathway                                                  | -0,023                     | 0,059                 | 0,030                | 5                     | 0,004                  |
| biocarta_actions_of_nitric_oxide_in_the_heart_Main_Pathway                                                              | -0,028                     | -0,050                | 0,023                | 39                    | -0,002                 |
| biocarta_activation_of_camp_dependent_protein_kinase_pka_Main_Pathway                                                   | -0,026                     | 0,010                 | -0,007               | 27                    | -0,016                 |
| biocarta_activation_of_csk_by_camp_dependent_protein_kinase_inhibits_signaling_through_the_t_cell_receptor_Main_Pathway | -0,010                     | -0,003                | 0,004                | 41                    | -0,003                 |
| biocarta_activation_of_pkc_through_g_protein_coupled_receptors_Main_Pathway                                             | -0,014                     | -0,015                | 0,008                | 11                    | -0,003                 |

| Pathway                                                                                                   | Tumour_MDA.<br>MB.231.<br>Invasive | Tumour_AU565.<br>Invasive | Tumour_T47D.<br>Invasive | Number<br>of genes<br>in PW | Mean<br>(MDA.<br>MB.231,<br>T47D) |
|-----------------------------------------------------------------------------------------------------------|------------------------------------|---------------------------|--------------------------|-----------------------------|-----------------------------------|
| biocarta_activation_of_pkc_through_g_protein_coupled_receptors_Pathway_(secretion)                        | -0,009                             | 0,015                     | 0,010                    | 4                           | 0,001                             |
| biocarta_adp_ribosylation_factor_Main_Pathway                                                             | 0,024                              | -0,015                    | 0,016                    | 28                          | 0,020                             |
| biocarta_agrin_in_postsynaptic_differentiation_Main_Pathway                                               | -0,003                             | -0,124                    | 0,041                    | 43                          | 0,019                             |
| biocarta_ahr_signal_transduction_Main_Pathway                                                             | -0,057                             | -0,012                    | 0,058                    | 4                           | 0,001                             |
| biocarta_akap95_role_in_mitosis_and_chromosome_dynamics_Main_Pathway                                      | -0,035                             | 0,046                     | -0,031                   | 13                          | -0,033                            |
| biocarta_akap95_role_in_mitosis_and_chromosome_dynamics_Pathway_(mitotic_chromosome_condensation)         | -0,035                             | 0,046                     | -0,031                   | 13                          | -0,033                            |
| biocarta_akap95_role_in_mitosis_and_chromosome_dynamics_Pathway_(mitotic_chromosome_decondensation)       | -0,035                             | 0,046                     | -0,031                   | 13                          | -0,033                            |
| biocarta_akt_signaling_Main_Pathway                                                                       | 0,009                              | -0,067                    | 0,035                    | 16                          | 0,022                             |
| biocarta_akt_signaling_Pathway_(apoptosis)                                                                | 0,008                              | -0,168                    | 0,063                    | 5                           | 0,035                             |
| biocarta_akt_signaling_Pathway_(cell_survival)                                                            | 0,008                              | -0,168                    | 0,063                    | 5                           | 0,035                             |
| biocarta_akt_signaling_Pathway_(Pathway_protein_ubiquitination_of_CHUK)                                   | 0,026                              | -0,072                    | 0,042                    | 4                           | 0,034                             |
| biocarta_alk_in_cardiac_myocytes_Main_Pathway                                                             | -0,028                             | 0,084                     | 0,020                    | 22                          | -0,004                            |
| biocarta_alternative_complement_Main_Pathway                                                              | 0,064                              | -0,072                    | 0,147                    | 9                           | 0,105                             |
| biocarta_angiotensin_ii_mediated_activation_of_jnk_pathway_via_pyk2_dependent_signaling_Main_Pathway      | -0,016                             | -0,081                    | 0,050                    | 23                          | 0,017                             |
| biocarta_apoptotic_signaling_in_response_to_dna_damage_Main_Pathway                                       | 0,013                              | -0,000                    | -0,036                   | 12                          | -0,011                            |
| biocarta_apoptotic_signaling_in_response_to_dna_damage_Pathway_(apoptosis)                                | 0,013                              | -0,022                    | -0,051                   | 11                          | -0,019                            |
| biocarta_aspirin_blocks_signaling_pathway_involved_in_platelet_activation_Main_Pathway                    | -0,012                             | -0,028                    | -0,001                   | 16                          | -0,006                            |
| biocarta_aspirin_blocks_signaling_pathway_involved_in_platelet_activation_Pathway_(vasoconstriction)      | -0,005                             | -0,040                    | -0,008                   | 12                          | -0,007                            |
| biocarta_atm_signaling_Main_Pathway                                                                       | 0,020                              | -0,104                    | 0,054                    | 15                          | 0,037                             |
| biocarta_atm_signaling_Pathway_(apoptosis)                                                                | 0,029                              | -0,104                    | 0,056                    | 6                           | 0,043                             |
| biocarta_atm_signaling_Pathway_(DNA_repair)                                                               | -0,030                             | -0,066                    | 0,074                    | 7                           | 0,022                             |
| biocarta_atm_signaling_Pathway_(Pathway_protein_ubiquitination_of_ATM)                                    | 0,049                              | -0,174                    | 0,093                    | 3                           | 0,071                             |
| biocarta_attenuation_of_gpcr_signaling_Main_Pathway                                                       | -0,094                             | -0,052                    | 0,002                    | 13                          | -0,046                            |
| biocarta_b_cell_survival_Main_Pathway                                                                     | 0,031                              | -0,158                    | 0,083                    | 11                          | 0,057                             |
| biocarta_b_cell_survival_Pathway_(apoptosis)                                                              | 0,072                              | -0,298                    | 0,060                    | 4                           | 0,066                             |
| biocarta_b_cell_survival_Pathway_(cell_proliferation)                                                     | 0,026                              | -0,076                    | 0,041                    | 3                           | 0,033                             |
| biocarta_basic_mechanism_of_action_of_ppara_pparb_d_and_pparg_and_effects_on_gene_expression_Main_Pathway | 0                                  | 0                         | 0                        | 5                           | 0                                 |
| biocarta_basic_mechanisms_of_sumoylation_Main_Pathway                                                     | -0,100                             | 0,252                     | -0,028                   | 6                           | -0,064                            |
| biocarta_basic_mechanisms_of_sumoylation_Pathway_(protein_modification_process)                           | -0,100                             | 0,252                     | -0,028                   | 6                           | -0,064                            |
| biocarta_bcr_signaling_Main_Pathway                                                                       | -0,045                             | 0,233                     | -0,003                   | 31                          | -0,024                            |
| biocarta_bcr_signaling_Pathway_(re_entry_into_mitotic_cell_cycle)                                         | -0,036                             | 0,076                     | 0,002                    | 9                           | -0,017                            |
| biocarta_bioactive_peptide_induced_signaling_Main_Pathway                                                 | -0,013                             | 0,032                     | 0,011                    | 20                          | -0,001                            |
| biocarta_bone_remodeling_Main_Pathway                                                                     | -0,009                             | -0,014                    | 0,053                    | 14                          | 0,022                             |
| biocarta_bone_remodeling_Pathway_(osteoclast_differentiation)                                             | -0,074                             | 0,033                     | 0,083                    | 6                           | 0,004                             |
| biocarta_bone_remodeling_Pathway_(Pathway_protein_ubiquitination_of_CHUK)                                 | 0,023                              | -0,053                    | 0,042                    | 6                           | 0,032                             |
| biocarta_brca1_dependent_ub_ligase_activity_Main_Pathway                                                  | 0                                  | -0,031                    | -0,010                   | 6                           | -0,005                            |
| biocarta_ca_calmodulin_dependent_protein_kinase_activation_Main_Pathway                                   | 0,023                              | -0,031                    | 0,021                    | 8                           | 0,022                             |
| biocarta_calcium_signaling_by_hbx_of_hepatitis_b_virus_Main_Pathway                                       | -0,019                             | 0,025                     | 0,018                    | 15                          | -0,001                            |
| biocarta_calcium_signaling_by_hbx_of_hepatitis_b_virus_Pathway_(viral_genome_replication)                 | 0,053                              | -0,197                    | 0,020                    | 4                           | 0,036                             |
| biocarta_caspase_cascade_in_apoptosis_Main_Pathway                                                        | -0,008                             | 0,027                     | -0,067                   | 18                          | -0,037                            |
| biocarta_caspase_cascade_in_apoptosis_Pathway_(Pathway_degradation_of_CASP1_CASP3_CASP4_CASP10_GZMB)      | 0,064                              | 0,003                     | -0,051                   | 9                           | 0,006                             |
| biocarta_cd40l_signaling_Main_Pathway                                                                     | 0,042                              | -0,150                    | 0,090                    | 7                           | 0,066                             |
| biocarta_cd40l_signaling_Pathway_(Pathway_protein_ubiquitination_of_TNFAIP3_MAP3K1_MAP4K4)                | 0,042                              | -0,150                    | 0,090                    | 7                           | 0,066                             |
| biocarta_cdc25_and_chk1_regulatory_pathway_in_response_to_dna_damage_Main_Pathway                         | 0,004                              | 0,031                     | -0,012                   | 7                           | -0,004                            |
| biocarta_cdk_regulation_of_dna_replication_Main_Pathway                                                   | -0,059                             | 0,059                     | -0,003                   | 17                          | -0,031                            |
| biocarta_cell_cycle_g1_s_check_point_Main_Pathway                                                         | -0,012                             | 0,012                     | -0,000                   | 21                          | -0,006                            |
| biocarta_cell_cycle_g2_m_checkpoint_Main_Pathway                                                          | -0,022                             | 0,008                     | 0,012                    | 19                          | -0,005                            |
| biocarta_cell_cycle_g2_m_checkpoint_Pathway_(DNA_repair)                                                  | -0,027                             | 0,181                     | -0,048                   | 3                           | -0,037                            |
| biocarta_cell_to_cell_adhesion_signaling_Main_Pathway                                                     | 0,011                              | -0,023                    | 0,033                    | 8                           | 0,022                             |

| Pathway                                                                                                                     | Tumour_MDA_MB.231_Invasive | Tumour_AU565_Invasive | Tumour_T47D_Invasive | Number of genes in PW | Mean (MDA_MB.231_T47D) |
|-----------------------------------------------------------------------------------------------------------------------------|----------------------------|-----------------------|----------------------|-----------------------|------------------------|
| biocarta_cell_to_cell_adhesion_signaling_Pathway_(cell_cell_adhesion)                                                       | 0,011                      | -0,023                | 0,033                | 8                     | 0,022                  |
| biocarta_cell_to_cell_adhesion_signaling_Pathway_(cell_migration)                                                           | 0,011                      | -0,023                | 0,033                | 8                     | 0,022                  |
| biocarta_ceramide_signaling_Main_Pathway                                                                                    | 0,015                      | -0,045                | 0,024                | 32                    | 0,020                  |
| biocarta_ceramide_signaling_Pathway_(Pathway_protein_ubiquitination_of_CHUK)                                                | -0,040                     | 0,017                 | 0,033                | 12                    | -0,003                 |
| biocarta_chaperones_modulate_interferon_signaling_Main_Pathway                                                              | -0,043                     | 0,031                 | 0,007                | 9                     | -0,018                 |
| biocarta_chaperones_modulate_interferon_signaling_Pathway_(apoptosis)                                                       | -0,026                     | -0,058                | -0,013               | 2                     | -0,019                 |
| biocarta_chaperones_modulate_interferon_signaling_Pathway_(Pathway_protein_ubiquitination_of_DNAJA3)                        | -0,009                     | -0,019                | -0,004               | 6                     | -0,006                 |
| biocarta_chrebp_regulation_by_carbohydrates_and_camp_Main_Pathway                                                           | -0,026                     | 0,021                 | -0,014               | 38                    | -0,020                 |
| biocarta_chromatin_remodeling_by_hswi_snf_atp_dependent_complexes_Main_Pathway                                              | -0,066                     | 0,066                 | 0,025                | 16                    | -0,021                 |
| biocarta_chromatin_remodeling_by_hswi_snf_atp_dependent_complexes_Pathway_(chromatin_remodeling)                            | -0,066                     | 0,066                 | 0,025                | 10                    | -0,021                 |
| biocarta_control_of_skeletal_myogenesis_by_hdac_and_calcium_calmodulin_dependent_kinase_camk_Main_Pathway                   | 0,014                      | -0,036                | 0,010                | 10                    | 0,012                  |
| biocarta_ctcf_first_multivalent_nuclear_factor_Main_Pathway                                                                 | -0,249                     | -0,007                | 0,041                | 22                    | -0,104                 |
| biocarta_cxcr4_signaling_Main_Pathway                                                                                       | -0,062                     | 0,026                 | -0,001               | 11                    | -0,031                 |
| biocarta_cycling_of_ran_in_nucleocytoplasmic_transport_Main_Pathway                                                         | -0,015                     | -0,005                | 0,036                | 9                     | 0,010                  |
| biocarta_cyclins_and_cell_cycle_regulation_Main_Pathway                                                                     | 0,001                      | 0,004                 | -0,006               | 23                    | -0,002                 |
| biocarta_cystic_fibrosis_transmembrane_conductance_regulator_cftr_and_beta_2_adrenergic_receptor_b2ar_Main_Pathway          | -0,042                     | 0,040                 | -0,009               | 20                    | -0,025                 |
| biocarta_d4gdi_signaling_Main_Pathway                                                                                       | -0,025                     | 0,110                 | -0,033               | 6                     | -0,029                 |
| biocarta_d4gdi_signaling_Pathway_(apoptosis)                                                                                | -0,025                     | 0,110                 | -0,033               | 6                     | -0,029                 |
| biocarta_deregulation_of_cdk5_in_alzheimers_disease_Main_Pathway                                                            | -0,014                     | 0,075                 | -0,004               | 5                     | -0,009                 |
| biocarta_deregulation_of_cdk5_in_alzheimers_disease_Pathway_(apoptosis)                                                     | -0,014                     | 0,075                 | -0,004               | 5                     | -0,009                 |
| biocarta_double_stranded_rna_induced_gene_expression_Main_Pathway                                                           | 0,016                      | -0,075                | 0,039                | 10                    | 0,028                  |
| biocarta_double_stranded_rna_induced_gene_expression_Pathway_(Pathway_protein_ubiquitination_of_CHUK)                       | 0,015                      | -0,124                | 0,083                | 5                     | 0,049                  |
| biocarta_double_stranded_rna_induced_gene_expression_Pathway_(translational_initiation)                                     | 0,097                      | -0,116                | 0,009                | 5                     | 0,053                  |
| biocarta_downregulated_of_mta_3_in_er_negative_breast_tumors_Main_Pathway                                                   | 0                          | 0                     | 0                    | 13                    | 0                      |
| biocarta_e2f1_destruction_Main_Pathway                                                                                      | -0,025                     | 0,072                 | 0,024                | 6                     | -0,000                 |
| biocarta_egr_signaling_Main_Pathway                                                                                         | -0,037                     | -0,124                | 0,015                | 20                    | -0,011                 |
| biocarta_endocytotic_role_of_ndk_phosphins_and_dynamin_Main_Pathway                                                         | -0,061                     | 0,051                 | 0,014                | 16                    | -0,024                 |
| biocarta_endocytotic_role_of_ndk_phosphins_and_dynamin_Pathway_(endocytosis)                                                | -0,073                     | 0,022                 | 0,024                | 10                    | -0,024                 |
| biocarta_epo_signaling_Main_Pathway                                                                                         | -0,049                     | 0,056                 | -0,000               | 11                    | -0,025                 |
| biocarta_erk_and_pi_3_kinase_are_necessary_for_collagen_binding_in_corneal_epithelia_Main_Pathway                           | -0,063                     | 0,141                 | -0,057               | 29                    | -0,060                 |
| biocarta_erk_and_pi_3_kinase_are_necessary_for_collagen_binding_in_corneal_epithelia_Pathway_(actin_filament_stabilization) | 0,050                      | 0,051                 | -0,047               | 5                     | 0,002                  |
| biocarta_erk_and_pi_3_kinase_are_necessary_for_collagen_binding_in_corneal_epithelia_Pathway_(cell_matrix_adhesion)         | -0,079                     | 0,129                 | -0,059               | 22                    | -0,069                 |
| biocarta_erk1_erk2_mapk_signaling_Main_Pathway                                                                              | 0,003                      | -0,058                | 0,014                | 22                    | 0,008                  |
| biocarta_eukaryotic_protein_translation_Main_Pathway                                                                        | -0,009                     | 0,062                 | -0,007               | 14                    | -0,008                 |
| biocarta_extrinsic_prothrombin_activation_Main_Pathway                                                                      | 0                          | 0                     | 0                    | 13                    | 0                      |
| biocarta_fas_signaling_pathway_cd95_Main_Pathway                                                                            | 0,052                      | -0,095                | 0,064                | 12                    | 0,058                  |
| biocarta_fc_epsilon_receptor_i_signaling_in_mast_cells_Main_Pathway                                                         | -0,017                     | 0,185                 | 0,015                | 27                    | -0,001                 |
| biocarta_fc_epsilon_receptor_i_signaling_in_mast_cells_Pathway_(acid_secretion)                                             | 0,040                      | 0,053                 | -0,028               | 5                     | 0,006                  |
| biocarta_fm1p_induced_chemokine_gene_expression_in_hmc_1_cells_Main_Pathway                                                 | -0,017                     | 0,031                 | -0,008               | 28                    | -0,013                 |
| biocarta_fm1p_induced_chemokine_gene_expression_in_hmc_1_cells_Pathway_(Pathway_degradation_of_PRKCA)                       | -0,036                     | 0,027                 | -0,007               | 7                     | -0,022                 |
| biocarta_g_protein_signaling_through_tubby_proteins_Main_Pathway                                                            | -0,033                     | -0,009                | -0,003               | 10                    | -0,018                 |
| biocarta_g_secretase_mediated_erb4_signaling_Main_Pathway                                                                   | 0,019                      | -0,146                | 0,063                | 8                     | 0,041                  |
| biocarta_gamma_aminobutyric_acid_receptor_life_cycle_Main_Pathway                                                           | 0,012                      | -0,090                | 0,030                | 12                    | 0,021                  |
| biocarta_granzyme_a_mediated_apoptosis_Main_Pathway                                                                         | -0,038                     | 0,192                 | -0,058               | 8                     | -0,048                 |
| biocarta_granzyme_a_mediated_apoptosis_Pathway_(DNA_fragmentation_during_apoptosis)                                         | -0,051                     | 0,256                 | -0,078               | 6                     | -0,064                 |
| biocarta_granzyme_a_mediated_apoptosis_Pathway_(DNA_repair)                                                                 | -0,051                     | 0,256                 | -0,078               | 6                     | -0,064                 |

| Pathway                                                                                                                                        | Tumour_MDA_MB.231_Invasive | Tumour_AU565_Invasive | Tumour_T47D_Invasive | Number of genes in PW | Mean (MDA_MB.231_T47D) |
|------------------------------------------------------------------------------------------------------------------------------------------------|----------------------------|-----------------------|----------------------|-----------------------|------------------------|
| biocarta_granzyme_a_mediated_apoptosis_Pathway_(Pathway_degradation_of_GZMB)                                                                   | 0                          | 0                     | 0                    | 3                     | 0                      |
| biocarta_granzyme_a_mediated_apoptosis_Pathway_(Pathway_regulation_of_transcription_via_SET_ANP32A_APEX1)                                      | -0,051                     | 0,256                 | -0,078               | 6                     | -0,064                 |
| biocarta_growth_hormone_signaling_Main_Pathway                                                                                                 | -0,029                     | 0,035                 | -0,008               | 19                    | -0,018                 |
| biocarta_hiv_1_nef_negative_effector_of_fas_and_tnf_Main_Pathway                                                                               | 0,004                      | 0,006                 | 0,028                | 28                    | 0,016                  |
| biocarta_hiv_1_nef_negative_effector_of_fas_and_tnf_Pathway_(Pathway_degradation_of_CASP8_BIRC2_APAF1)                                         | 0,018                      | -0,017                | 0,035                | 13                    | 0,026                  |
| biocarta_hiv_1_nef_negative_effector_of_fas_and_tnf_Pathway_(Pathway_protein_ubiquitination_of_CHUK)                                           | -0,034                     | 0,092                 | 0,011                | 13                    | -0,012                 |
| biocarta_hop_pathway_in_cardiac_development_Main_Pathway                                                                                       | -0,040                     | 0,192                 | 0,053                | 4                     | 0,006                  |
| biocarta_hop_pathway_in_cardiac_development_Pathway_(cell_differentiation)                                                                     | -0,040                     | 0,192                 | 0,053                | 4                     | 0,006                  |
| biocarta_hop_pathway_in_cardiac_development_Pathway_(cell_proliferation)                                                                       | -0,040                     | 0,192                 | 0,053                | 4                     | 0,006                  |
| biocarta_how_does_salmonella_hijack_a_cell_Main_Pathway                                                                                        | 0,038                      | -0,101                | 0,004                | 11                    | 0,021                  |
| biocarta_how_does_salmonella_hijack_a_cell_Pathway_(lamellipodium_assembly)                                                                    | 0,038                      | -0,101                | 0,004                | 11                    | 0,021                  |
| biocarta_how_progesterone_initiates_the_oocyte_maturation_Main_Pathway                                                                         | 0,011                      | -0,007                | -0,021               | 23                    | -0,005                 |
| biocarta_how_progesterone_initiates_the_oocyte_maturation_Pathway_(oocyte_maturation)                                                          | 0,050                      | 0,029                 | -0,025               | 13                    | 0,012                  |
| biocarta_human_cytomegalovirus_and_map_kinase_pathways_Main_Pathway                                                                            | -0,004                     | 0,008                 | 0,014                | 16                    | 0,005                  |
| biocarta_hypoxia_and_p53_in_the_cardiovascular_system_Main_Pathway                                                                             | -0,007                     | 0,040                 | -0,002               | 15                    | -0,004                 |
| biocarta_hypoxia_inducible_factor_in_the_cardiovascular_system_Main_Pathway                                                                    | -0,015                     | -0,036                | -0,000               | 16                    | -0,008                 |
| biocarta_ifn_alpha_signaling_Main_Pathway                                                                                                      | 0,077                      | -0,271                | 0,001                | 8                     | 0,039                  |
| biocarta_ifn_gamma_signaling_Main_Pathway                                                                                                      | 0,125                      | -0,338                | 0,004                | 6                     | 0,064                  |
| biocarta_igf_1_signaling_Main_Pathway                                                                                                          | 0,010                      | -0,006                | -0,002               | 20                    | 0,004                  |
| biocarta_il_2_receptor_beta_chain_in_t_cell_activation_Main_Pathway                                                                            | -0,135                     | -0,053                | 0,033                | 45                    | -0,051                 |
| biocarta_il_2_receptor_beta_chain_in_t_cell_activation_Pathway_(apoptosis)                                                                     | 0,011                      | 0,039                 | 0,005                | 10                    | 0,008                  |
| biocarta_il_2_receptor_beta_chain_in_t_cell_activation_Pathway_(cell_proliferation)                                                            | -0,660                     | 0,022                 | 0,075                | 16                    | -0,292                 |
| biocarta_il_2_signaling_Main_Pathway                                                                                                           | -0,078                     | 0,050                 | -0,014               | 14                    | -0,046                 |
| biocarta_il_3_signaling_Main_Pathway                                                                                                           | -0,046                     | 0,065                 | 0,026                | 11                    | -0,010                 |
| biocarta_il_4_signaling_Main_Pathway                                                                                                           | 0,055                      | -0,271                | 0,032                | 13                    | 0,043                  |
| biocarta_il_4_signaling_Pathway_(cell_proliferation)                                                                                           | 0,012                      | -0,147                | -0,031               | 6                     | -0,010                 |
| biocarta_il_4_signaling_Pathway_(cell_survival)                                                                                                | 0,022                      | -0,166                | -0,013               | 7                     | 0,004                  |
| biocarta_il_4_signaling_Pathway_(G1_phase_of_mitotic_cell_cycle)                                                                               | 0,008                      | -0,120                | -0,034               | 7                     | -0,013                 |
| biocarta_il_6_signaling_Main_Pathway                                                                                                           | -0,028                     | -0,106                | 0,004                | 12                    | -0,012                 |
| biocarta_il_7_signal_transduction_Main_Pathway                                                                                                 | -0,005                     | -0,101                | 0,051                | 15                    | 0,023                  |
| biocarta_il_7_signal_transduction_Pathway_(cell_proliferation)                                                                                 | -0,019                     | -0,035                | 0,003                | 8                     | -0,008                 |
| biocarta_il_7_signal_transduction_Pathway_(cell_survival)                                                                                      | 0,037                      | -0,205                | -0,003               | 6                     | 0,017                  |
| biocarta_il12_and_stat4_dependent_signaling_pathway_in_th1_development_Main_Pathway                                                            | -0,023                     | -0,024                | 0,046                | 9                     | 0,011                  |
| biocarta_il22_soluble_receptor_signaling_Main_Pathway                                                                                          | 0,037                      | -0,205                | -0,003               | 6                     | 0,017                  |
| biocarta_inactivation_of_gsk3_by_akt_causes_accumulation_of_b_catenin_in_alveolar_macrophages_Main_Pathway                                     | 0,036                      | -0,089                | 0,042                | 22                    | 0,039                  |
| biocarta_inactivation_of_gsk3_by_akt_causes_accumulation_of_b_catenin_in_alveolar_macrophages_Pathway_(Pathway_protein_ubiquitination_of_CHUK) | 0,007                      | -0,118                | 0,062                | 6                     | 0,034                  |
| biocarta_induction_of_apoptosis_through_dr3_and_dr4_5_death_receptors_Main_Pathway                                                             | -0,217                     | 0,238                 | 0,020                | 19                    | -0,099                 |
| biocarta_induction_of_apoptosis_through_dr3_and_dr4_5_death_receptors_Pathway_(apoptosis)                                                      | -0,243                     | 0,255                 | 0,017                | 17                    | -0,113                 |
| biocarta_induction_of_apoptosis_through_dr3_and_dr4_5_death_receptors_Pathway_(Pathway_degradation_of_CASP3_CASP10_CASP10)                     | -0,367                     | 0,404                 | 0,004                | 12                    | -0,182                 |
| biocarta_influence_of_ras_and_rho_proteins_on_g1_to_s_transition_Main_Pathway                                                                  | -0,019                     | 0,029                 | 0,012                | 15                    | -0,004                 |
| biocarta_influence_of_ras_and_rho_proteins_on_g1_to_s_transition_Pathway_(Pathway_protein_ubiquitination_of_CHUK)                              | 0,013                      | -0,142                | 0,070                | 5                     | 0,042                  |
| biocarta_inhibition_of_cellular_proliferation_by_gleevec_Main_Pathway                                                                          | 0,037                      | -0,089                | 0,053                | 22                    | 0,045                  |
| biocarta_inhibition_of_matrix_metalloproteinases_Main_Pathway                                                                                  | -0,049                     | -0,091                | 0,010                | 6                     | -0,020                 |
| biocarta_inhibition_of_matrix_metalloproteinases_Pathway_(Pathway_degradation_of_RECK_TIMP4_MMP14_TIMP2_TIMP1_TIMP3)                           | -0,049                     | -0,091                | 0,010                | 6                     | -0,020                 |
| biocarta_insulin_signaling_Main_Pathway                                                                                                        | -0,040                     | 0,052                 | -0,025               | 11                    | -0,032                 |
| biocarta_integrin_signaling_Main_Pathway                                                                                                       | 0,093                      | -0,164                | 0,051                | 24                    | 0,072                  |
| biocarta_internal_ribosome_entry_Main_Pathway                                                                                                  | 0,050                      | 0,037                 | -0,008               | 18                    | 0,021                  |

| Pathway                                                                                                                                                                           | Tumour_MDA_MB.231_Invasive | Tumour_AU565_Invasive | Tumour_T47D_Invasive | Number of genes in PW | Mean (MDA_MB.231_T47D) |
|-----------------------------------------------------------------------------------------------------------------------------------------------------------------------------------|----------------------------|-----------------------|----------------------|-----------------------|------------------------|
| biocarta_internal_ribosome_entry_Pathway_(translational_initiation)                                                                                                               | 0,050                      | 0,037                 | -0,008               | 18                    | 0,021                  |
| biocarta_keratinocyte_differentiation_Main_Pathway                                                                                                                                | -0,018                     | -0,065                | 0,045                | 48                    | 0,014                  |
| biocarta_keratinocyte_differentiation_Pathway_(apoptosis)                                                                                                                         | 0,042                      | -0,186                | 0,068                | 12                    | 0,055                  |
| biocarta_keratinocyte_differentiation_Pathway_(keratinocyte_differentiation)                                                                                                      | -0,040                     | 0,056                 | 0,048                | 10                    | 0,004                  |
| biocarta_keratinocyte_differentiation_Pathway_(Pathway_protein_ubiquitination_of_CHUK)                                                                                            | -0,013                     | -0,023                | 0,048                | 9                     | 0,018                  |
| biocarta_lck_and_fyn_tyrosine_kinases_in_initiation_of_tcr_activation_Main_Pathway                                                                                                | -0,029                     | 0,079                 | -0,008               | 12                    | -0,018                 |
| biocarta_lissencephaly_gene_lis1_in_neuronal_migration_and_development_Main_Pathway                                                                                               | 0,009                      | -0,033                | -0,017               | 18                    | -0,004                 |
| biocarta_lissencephaly_gene_lis1_in_neuronal_migration_and_development_Pathway_(negative_regulation_of_microtubule_depolymerization)                                              | 0,004                      | -0,035                | 0,028                | 9                     | 0,016                  |
| biocarta_lissencephaly_gene_lis1_in_neuronal_migration_and_development_Pathway_(retrograde_axon_cargo_transport)                                                                  | 0,020                      | -0,069                | -0,041               | 11                    | -0,010                 |
| biocarta_map_kinase_inactivation_of_smrt_corepressor_Main_Pathway                                                                                                                 | -0,028                     | -0,131                | 0,044                | 12                    | 0,008                  |
| biocarta_mapkinase_signaling_Main_Pathway                                                                                                                                         | 0,008                      | -0,004                | 0,022                | 55                    | 0,015                  |
| biocarta_mcalpain_and_friends_in_cell_motility_Main_Pathway                                                                                                                       | 0,012                      | -0,050                | 0,012                | 30                    | 0,012                  |
| biocarta_mcalpain_and_friends_in_cell_motility_Pathway_(cell_migration)                                                                                                           | 0,077                      | -0,144                | 0,026                | 9                     | 0,051                  |
| biocarta_mechanism_of_acetaminophen_activity_and_toxicity_Main_Pathway                                                                                                            | 0                          | 0                     | 0                    | 4                     | 0                      |
| biocarta_mechanism_of_acetaminophen_activity_and_toxicity_Pathway_(fever)                                                                                                         | 0                          | 0                     | 0                    | 1                     | 0                      |
| biocarta_mechanism_of_acetaminophen_activity_and_toxicity_Pathway_(inflammatory_response)                                                                                         | 0                          | 0                     | 0                    | 1                     | 0                      |
| biocarta_mechanism_of_acetaminophen_activity_and_toxicity_Pathway_(platelet_activation)                                                                                           | 0                          | 0                     | 0                    | 1                     | 0                      |
| biocarta_mechanism_of_acetaminophen_activity_and_toxicity_Pathway_(prostaglandin_biosynthetic_process)                                                                            | 0                          | 0                     | 0                    | 1                     | 0                      |
| biocarta_mechanism_of_protein_import_into_the_nucleus_Main_Pathway                                                                                                                | -0,004                     | 0,004                 | 0,023                | 12                    | 0,010                  |
| biocarta_mechanisms_of_transcriptional_repression_by_dna_methylation_Main_Pathway                                                                                                 | -0,067                     | 0,160                 | -0,013               | 14                    | -0,040                 |
| biocarta_mechanisms_of_transcriptional_repression_by_dna_methylation_Pathway_(histone_deacetylation)                                                                              | -0,067                     | 0,160                 | -0,013               | 14                    | -0,040                 |
| biocarta_melanocyte_development_and_pigmentation_Main_Pathway                                                                                                                     | -0,003                     | 0,050                 | -0,000               | 12                    | -0,002                 |
| biocarta_mets_affect_on_macrophage_differentiation_Main_Pathway                                                                                                                   | -0,053                     | 0,047                 | 0,002                | 10                    | -0,025                 |
| biocarta_mets_affect_on_macrophage_differentiation_Pathway_(RNA_processing)                                                                                                       | -0,095                     | 0,050                 | 0,003                | 1                     | -0,046                 |
| biocarta_multi_step_regulation_of_transcription_by_pitx2_Main_Pathway                                                                                                             | -0,042                     | 0,060                 | -0,011               | 23                    | -0,027                 |
| biocarta_multiple_antiapoptotic_pathways_from_igf_1r_signaling_lead_to_bad_phosphorylation_Main_Pathway                                                                           | -0,024                     | -0,053                | 0,029                | 10                    | 0,003                  |
| biocarta_multiple_antiapoptotic_pathways_from_igf_1r_signaling_lead_to_bad_phosphorylation_Pathway_(apoptosis)                                                                    | 0,025                      | -0,160                | 0,061                | 6                     | 0,043                  |
| biocarta_multiple_antiapoptotic_pathways_from_igf_1r_signaling_lead_to_bad_phosphorylation_Pathway_(cell_growth_and_or_maintenance)                                               | 0,025                      | -0,160                | 0,061                | 6                     | 0,043                  |
| biocarta_nerve_growth_factor_pathway_ngf_Main_Pathway                                                                                                                             | -0,015                     | 0,056                 | 0,020                | 17                    | 0,003                  |
| biocarta_nf_kb_signaling_Main_Pathway                                                                                                                                             | -0,008                     | 0,049                 | 0,028                | 21                    | 0,010                  |
| biocarta_nf_kb_signaling_Pathway_(Pathway_protein_ubiquitination_of_CHUK)                                                                                                         | -0,016                     | 0,072                 | 0,024                | 18                    | 0,004                  |
| biocarta_nfat_and_hypertrophy_of_the_heart_Main_Pathway                                                                                                                           | -0,157                     | 0,002                 | 0,036                | 37                    | -0,061                 |
| biocarta_nfk_b_activation_by_nontypeable_hemophilus_influenzae_Main_Pathway                                                                                                       | -0,014                     | 0,002                 | 0,025                | 16                    | 0,005                  |
| biocarta_nfk_b_activation_by_nontypeable_hemophilus_influenzae_Pathway_(Pathway_protein_ubiquitination_of_CHUK)                                                                   | -0,004                     | -0,045                | 0,083                | 5                     | 0,039                  |
| biocarta_nitric_oxide_signaling_Main_Pathway                                                                                                                                      | 0,009                      | 0,009                 | 0,001                | 19                    | 0,005                  |
| biocarta_no2_dependent_il_12_pathway_in_nk_cells_Main_Pathway                                                                                                                     | -0,019                     | -0,024                | 0,048                | 9                     | 0,014                  |
| biocarta_no2_dependent_il_12_pathway_in_nk_cells_Pathway_(interleukin_12_biosynthetic_process)                                                                                    | 0                          | 0                     | 0                    | 1                     | 0                      |
| biocarta_nuclear_receptors_coordinate_the_activities_of_chromatin_remodeling_complexes_and_coactivators_to_facilitate_initiation_of_transcription_in_carcinoma_cells_Main_Pathway | -0,065                     | -0,005                | 0,007                | 8                     | -0,029                 |
| biocarta_opposing_roles_of_aif_in_apoptosis_and_cell_survival_Main_Pathway                                                                                                        | 0,089                      | -0,091                | 0,056                | 3                     | 0,073                  |
| biocarta_opposing_roles_of_aif_in_apoptosis_and_cell_survival_Pathway_(DNA_fragmentation_during_apoptosis)                                                                        | 0,089                      | -0,091                | 0,056                | 3                     | 0,073                  |
| biocarta_opposing_roles_of_aif_in_apoptosis_and_cell_survival_Pathway_(removal_of_superoxide_radicals)                                                                            | 0,089                      | -0,091                | 0,056                | 3                     | 0,073                  |
| biocarta_overview_of_telomerase_ma_component_gene_hterc_transcriptional_regulation_Main_Pathway                                                                                   | -0,044                     | -0,081                | 0,071                | 7                     | 0,014                  |
| biocarta_oxidative_stress_induced_gene_expression_via_nrf2_Main_Pathway                                                                                                           | -0,048                     | 0,150                 | 0,047                | 12                    | -0,001                 |

| Pathway                                                                                                                                      | Tumour_MDA_MB.231_Invasive | Tumour_AU565_Invasive | Tumour_T47D_Invasive | Number of genes in PW | Mean (MDA_MB.231_T47D) |
|----------------------------------------------------------------------------------------------------------------------------------------------|----------------------------|-----------------------|----------------------|-----------------------|------------------------|
| biocarta_p38_mapk_signaling_Main_Pathway                                                                                                     | 0,011                      | -0,070                | 0,022                | 30                    | 0,016                  |
| biocarta_p53_signaling_Main_Pathway                                                                                                          | -0,018                     | 0,054                 | -0,011               | 11                    | -0,014                 |
| biocarta_pdgf_signaling_Main_Pathway                                                                                                         | 0,030                      | -0,110                | 0,043                | 26                    | 0,036                  |
| biocarta_pelp1_modulation_of_estrogen_receptor_activity_Main_Pathway                                                                         | 0,039                      | -0,009                | 0,084                | 4                     | 0,062                  |
| biocarta_phospholipids_as_signalling_intermediaries_Main_Pathway                                                                             | -0,017                     | -0,027                | 0,014                | 33                    | -0,002                 |
| biocarta_phospholipids_as_signalling_intermediaries_Pathway_(actin_filament_organization)                                                    | -0,089                     | 0,020                 | -0,004               | 10                    | -0,047                 |
| biocarta_phospholipids_as_signalling_intermediaries_Pathway_(cell_proliferation)                                                             | 0,040                      | 0,014                 | -0,016               | 5                     | 0,012                  |
| biocarta_phospholipids_as_signalling_intermediaries_Pathway_(cell_survival)                                                                  | 0,040                      | 0,014                 | -0,016               | 5                     | 0,012                  |
| biocarta_phospholipids_as_signalling_intermediaries_Pathway_(chemotaxis)                                                                     | -0,089                     | 0,020                 | -0,004               | 10                    | -0,047                 |
| biocarta_phospholipids_as_signalling_intermediaries_Pathway_(lamellipodium_assembly)                                                         | -0,063                     | -0,016                | 0,027                | 11                    | -0,018                 |
| biocarta_phosphorylation_of_mek1_by_cdk5_p35_down_regulates_the_map_kinase_Main_Pathway                                                      | -0,017                     | 0,081                 | 0,000                | 14                    | -0,008                 |
| biocarta_pkc_catalyzed_phosphorylation_of_inhibitory_phosphoprotein_of_myosin_phosphatase_Main_Pathway                                       | -0,009                     | -0,038                | 0,014                | 21                    | 0,002                  |
| biocarta_pkc_catalyzed_phosphorylation_of_inhibitory_phosphoprotein_of_myosin_phosphatase_Pathway_(secretion)                                | 0,009                      | 0,013                 | 0,006                | 7                     | 0,007                  |
| biocarta_polyadenylation_of_mrna_Main_Pathway                                                                                                | 0,004                      | 0,078                 | 0,024                | 8                     | 0,014                  |
| biocarta_prion_Main_Pathway                                                                                                                  | 0,014                      | -0,143                | 0,039                | 18                    | 0,027                  |
| biocarta_proteasome_complex_Main_Pathway                                                                                                     | -0,042                     | 0,133                 | -0,036               | 21                    | -0,039                 |
| biocarta_proteasome_complex_Pathway_(Pathway_degradation_of_PSMA1)                                                                           | -0,042                     | 0,133                 | -0,036               | 21                    | -0,039                 |
| biocarta_protein_kinase_a_at_the_centrosome_Main_Pathway                                                                                     | -0,015                     | -0,018                | -0,019               | 12                    | -0,017                 |
| biocarta_pten_dependent_cell_cycle_arrest_and_apoptosis_Main_Pathway                                                                         | -0,004                     | -0,053                | 0,014                | 15                    | 0,005                  |
| biocarta_pten_dependent_cell_cycle_arrest_and_apoptosis_Pathway_(cell_migration)                                                             | -0,021                     | -0,060                | -0,014               | 7                     | -0,017                 |
| biocarta_pten_dependent_cell_cycle_arrest_and_apoptosis_Pathway_(cell_survival)                                                              | 0,020                      | -0,070                | 0,023                | 4                     | 0,022                  |
| biocarta_rac1_cell_motility_signaling_Main_Pathway                                                                                           | -0,151                     | -0,018                | 0,011                | 33                    | -0,070                 |
| biocarta_rac1_cell_motility_signaling_Pathway_(actin_filament_depolymerization)                                                              | -0,065                     | 0,176                 | -0,007               | 3                     | -0,036                 |
| biocarta_rac1_cell_motility_signaling_Pathway_(actin_filament_organization)                                                                  | -0,002                     | -0,054                | -0,005               | 22                    | -0,003                 |
| biocarta_rac1_cell_motility_signaling_Pathway_(phosphatidic_acid_metabolic_process)                                                          | -0,018                     | -0,063                | -0,002               | 21                    | -0,010                 |
| biocarta_ras_independent_pathway_in_nk_cell_mediated_cytotoxicity_Main_Pathway                                                               | -0,006                     | 0,057                 | -0,020               | 22                    | -0,013                 |
| biocarta_ras_independent_pathway_in_nk_cell_mediated_cytotoxicity_Pathway_(positive_regulation_of_natural_killer_cell_mediated_cytotoxicity) | -0,035                     | 0,260                 | -0,034               | 3                     | -0,034                 |
| biocarta_rb_tumor_suppressor_checkpoint_signaling_in_response_to_dna_damage_Main_Pathway                                                     | -0,027                     | 0,054                 | -0,010               | 9                     | -0,019                 |
| biocarta_regulation_of_bad_phosphorylation_Main_Pathway                                                                                      | -0,012                     | -0,020                | 0,003                | 23                    | -0,004                 |
| biocarta_regulation_of_bad_phosphorylation_Pathway_(apoptosis)                                                                               | -0,122                     | -0,057                | -0,018               | 3                     | -0,070                 |
| biocarta_regulation_of_ck1_cdk5_by_type_1_glutamate_receptors_Main_Pathway                                                                   | -0,018                     | 0,008                 | -0,013               | 24                    | -0,016                 |
| biocarta_regulation_of_eif_4e_and_p70s6_kinase_Main_Pathway                                                                                  | -0,224                     | -0,062                | 0,035                | 22                    | -0,094                 |
| biocarta_regulation_of_eif2_Main_Pathway                                                                                                     | 0,034                      | -0,011                | -0,005               | 11                    | 0,014                  |
| biocarta_regulation_of_map_kinase_pathways_through_dual_specificity_phosphatases_Main_Pathway                                                | 0,021                      | -0,017                | 0,003                | 9                     | 0,012                  |
| biocarta_regulation_of_pgc_1a_Main_Pathway                                                                                                   | 0,015                      | -0,018                | 0,017                | 19                    | 0,016                  |
| biocarta_regulation_of_spermatogenesis_by_crem_Main_Pathway                                                                                  | -0,034                     | 0,007                 | -0,021               | 10                    | -0,027                 |
| biocarta_regulation_of_spermatogenesis_by_crem_Pathway_(spermatogenesis)                                                                     | -0,020                     | -0,009                | -0,019               | 6                     | -0,020                 |
| biocarta_regulation_of_splicing_through_sam68_Main_Pathway                                                                                   | -0,022                     | 0,049                 | -0,005               | 10                    | -0,014                 |
| biocarta_regulation_of_splicing_through_sam68_Pathway_(negative_regulation_of_cell_growth)                                                   | -0,015                     | 0,065                 | -0,013               | 8                     | -0,014                 |
| biocarta_regulation_of_splicing_through_sam68_Pathway_(positive_regulation_of_nuclear_mRNA_splicing_via_spliceosome)                         | -0,015                     | 0,065                 | -0,013               | 8                     | -0,014                 |
| biocarta_regulation_of_transcriptional_activity_by_pml_Main_Pathway                                                                          | -0,065                     | 0,034                 | 0,041                | 8                     | -0,012                 |
| biocarta_regulation_of_transcriptional_activity_by_pml_Pathway_(negative_regulation_of_cell_proliferation)                                   | -0,065                     | 0,034                 | 0,041                | 8                     | -0,012                 |
| biocarta_regulators_of_bone_mineralization_Main_Pathway                                                                                      | 0,071                      | -0,250                | 0,071                | 11                    | 0,071                  |
| biocarta_repression_of_pain_sensation_by_the_transcriptional_regulator_dream_Main_Pathway                                                    | -0,046                     | 0,091                 | 0,009                | 13                    | -0,018                 |
| biocarta_reversal_of_insulin_resistance_by_leptin_Main_Pathway                                                                               | -0,066                     | 0,128                 | -0,057               | 10                    | -0,061                 |

| Pathway                                                                                                                                                                | Tumour_MDA_MB.231_Invasive | Tumour_AU565_Invasive | Tumour_T47D_Invasive | Number of genes in PW | Mean (MDA_MB.231_T47D) |
|------------------------------------------------------------------------------------------------------------------------------------------------------------------------|----------------------------|-----------------------|----------------------|-----------------------|------------------------|
| biocarta_reversal_of_insulin_resistance_by_leptin_Pathway_(fatty_acid_oxidation)                                                                                       | -0,066                     | 0,128                 | -0,057               | 10                    | -0,061                 |
| biocarta_rho_cell_motility_signaling_Main_Pathway                                                                                                                      | 0,023                      | -0,050                | 0,007                | 32                    | 0,015                  |
| biocarta_rho_cell_motility_signaling_Pathway_(actin_filament_polymerization)                                                                                           | 0,004                      | -0,041                | 0,003                | 24                    | 0,004                  |
| biocarta_rho_cell_motility_signaling_Pathway_(actin_filament_stabilization)                                                                                            | -0,008                     | 0,038                 | -0,015               | 7                     | -0,012                 |
| biocarta_rho_cell_motility_signaling_Pathway_(focal_adhesion_formation)                                                                                                | 0,161                      | -0,182                | 0,052                | 5                     | 0,106                  |
| biocarta_rho_selective_guanine_exchange_factor_akap13_mediates_stress_fiber_formation_Main_Pathway                                                                     | -0,003                     | -0,018                | -0,026               | 10                    | -0,014                 |
| biocarta_rna_polymerase_iii_transcription_Main_Pathway                                                                                                                 | 0,003                      | -0,157                | 0,067                | 7                     | 0,035                  |
| biocarta_rna_polymerase_iii_transcription_Pathway_(Pathway_transcription_initiation_via_BDP1)                                                                          | 0,003                      | -0,157                | 0,067                | 7                     | 0,035                  |
| biocarta_role_of_brca1_brca2_and_atr_in_cancer_susceptibility_Main_Pathway                                                                                             | 0,012                      | -0,069                | 0,008                | 16                    | 0,010                  |
| biocarta_role_of_brca1_brca2_and_atr_in_cancer_susceptibility_Pathway_(DNA_replication_termination)                                                                    | -0,003                     | -0,085                | 0,033                | 11                    | 0,015                  |
| biocarta_role_of_brca1_brca2_and_atr_in_cancer_susceptibility_Pathway_(Pathway_protein_ubiquitination_of_ATM_BRCA1)                                                    | -0,006                     | -0,044                | 0,010                | 8                     | 0,002                  |
| biocarta_role_of_brca1_brca2_and_atr_in_cancer_susceptibility_Pathway_(regulation_of_DNA_replication)                                                                  | 0,005                      | -0,100                | 0,041                | 6                     | 0,023                  |
| biocarta_role_of_egr_receptor_transactivation_by_gpcrs_in_cardiac_hypertrophy_Main_Pathway                                                                             | -0,038                     | -0,045                | 0,040                | 19                    | 0,001                  |
| biocarta_role_of_egr_receptor_transactivation_by_gpcrs_in_cardiac_hypertrophy_Pathway_(cell_growth)                                                                    | -0,033                     | -0,065                | 0,047                | 10                    | 0,007                  |
| biocarta_role_of_egr_receptor_transactivation_by_gpcrs_in_cardiac_hypertrophy_Pathway_(Pathway_protein_ubiquitination_of_CHUK)                                         | 0,018                      | -0,078                | 0,044                | 6                     | 0,031                  |
| biocarta_role_of_erb2_in_signal_transduction_and_oncology_Main_Pathway                                                                                                 | -0,022                     | -0,057                | 0,032                | 21                    | 0,005                  |
| biocarta_role_of_erk5_in_neuronal_survival_Main_Pathway                                                                                                                | -0,009                     | -0,026                | 0,018                | 26                    | 0,005                  |
| biocarta_role_of_erk5_in_neuronal_survival_Pathway_(cell_survival)                                                                                                     | -0,005                     | 0,001                 | 0,022                | 12                    | 0,008                  |
| biocarta_role_of_erk5_in_neuronal_survival_Pathway_(positive_regulation_of_axon_extension)                                                                             | 0,029                      | -0,025                | 0,018                | 9                     | 0,024                  |
| biocarta_role_of_mal_in_rho_mediated_activation_of_srf_Main_Pathway                                                                                                    | 0,011                      | 0,050                 | -0,021               | 19                    | -0,005                 |
| biocarta_role_of_mef2d_in_t_cell_apoptosis_Main_Pathway                                                                                                                | -0,008                     | -0,007                | -0,009               | 27                    | -0,009                 |
| biocarta_role_of_mef2d_in_t_cell_apoptosis_Pathway_(Pathway_degradation_of_CAPN2)                                                                                      | -0,042                     | -0,072                | -0,038               | 4                     | -0,040                 |
| biocarta_role_of_mitochondria_in_apoptotic_signaling_Main_Pathway                                                                                                      | -0,058                     | 0,069                 | -0,070               | 12                    | -0,064                 |
| biocarta_role_of_nicotinic_acetylcholine_receptors_in_the_regulation_of_apoptosis_Main_Pathway                                                                         | 0,030                      | -0,040                | 0,012                | 17                    | 0,021                  |
| biocarta_role_of_parkin_in_ubiquitin_proteasomal_Main_Pathway                                                                                                          | 0,039                      | -0,039                | -0,004               | 8                     | 0,018                  |
| biocarta_role_of_pi3k_subunit_p85_in_regulation_of_actin_organization_and_cell_migration_Main_Pathway                                                                  | 0,004                      | -0,044                | 0,018                | 16                    | 0,011                  |
| biocarta_role_of_pi3k_subunit_p85_in_regulation_of_actin_organization_and_cell_migration_Pathway_(filopodium_formation)                                                | 0,046                      | -0,157                | 0,029                | 9                     | 0,038                  |
| biocarta_role_of_pi3k_subunit_p85_in_regulation_of_actin_organization_and_cell_migration_Pathway_(negative_regulation_of_actin_polymerization_and_or_depolymerization) | -0,042                     | 0,180                 | 0,021                | 3                     | -0,010                 |
| biocarta_role_of_ppar_gamma_coactivators_in_obesity_and_thermogenesis_Main_Pathway                                                                                     | -0,018                     | 0,009                 | -0,009               | 5                     | -0,013                 |
| biocarta_role_of_ppar_gamma_coactivators_in_obesity_and_thermogenesis_Pathway_(fat_cell_differentiation)                                                               | -0,018                     | 0,009                 | -0,009               | 4                     | -0,013                 |
| biocarta_role_of_ran_in_mitotic_spindle_regulation_Main_Pathway                                                                                                        | 0,038                      | -0,150                | 0,032                | 10                    | 0,035                  |
| biocarta_role_of_U_00DF_arrestins_in_the_activation_and_targeting_of_map_kinases_Main_Pathway                                                                          | -0,027                     | -0,026                | -0,000               | 28                    | -0,013                 |
| biocarta_segmentation_clock_Main_Pathway                                                                                                                               | -0,029                     | 0,035                 | 0,010                | 17                    | -0,009                 |
| biocarta_signal_dependent_regulation_of_myogenesis_by_corepressor_mitr_Main_Pathway                                                                                    | 0,019                      | -0,021                | 0,010                | 8                     | 0,015                  |
| biocarta_signal_transduction_through_il1r_Main_Pathway                                                                                                                 | -0,015                     | 0,021                 | 0,013                | 34                    | -0,001                 |
| biocarta_signal_transduction_through_il1r_Pathway_(Pathway_protein_ubiquitination_of_CHUK_PEBP1)                                                                       | -0,006                     | -0,021                | 0,038                | 10                    | 0,016                  |
| biocarta_signaling_pathway_from_g_protein_families_Main_Pathway                                                                                                        | -0,056                     | 0,059                 | -0,012               | 26                    | -0,034                 |
| biocarta_skeletal_muscle_hypertrophy_is_regulated_via_akt_mtor_Main_Pathway                                                                                            | -0,242                     | -0,010                | 0,034                | 20                    | -0,104                 |
| biocarta_skeletal_muscle_hypertrophy_is_regulated_via_akt_mtor_Pathway_(muscle_development)                                                                            | -0,574                     | 0,068                 | 0,026                | 8                     | -0,274                 |
| biocarta_sodd_tnfr1_signaling_Main_Pathway                                                                                                                             | -0,051                     | 0,071                 | 0,015                | 9                     | -0,018                 |
| biocarta_sonic_hedgehog_receptor_ptc1_regulates_cell_cycle_Main_Pathway                                                                                                | 0,009                      | -0,023                | -0,027               | 9                     | -0,009                 |
| biocarta_sonic_hedgehog_receptor_ptc1_regulates_cell_cycle_Pathway_(cell_cycle_arrest)                                                                                 | 0,029                      | 0,094                 | -0,035               | 3                     | -0,003                 |



| Pathway                                                                                                                       | Tumour_MDA_MB.231_Invasive | Tumour_AU565_Invasive | Tumour_T47D_Invasive | Number of genes in PW | Mean (MDA_MB.231_T47D) |
|-------------------------------------------------------------------------------------------------------------------------------|----------------------------|-----------------------|----------------------|-----------------------|------------------------|
| biocarta_sonic_hedgehog_receptor_ptc1_regulates_cell_cycle_Pathway_(re_entry_into_mitotic_cell_cycle)                         | 0,009                      | -0,023                | -0,027               | 9                     | -0,009                 |
| biocarta_spliceosomal_assembly_Main_Pathway                                                                                   | -0,030                     | 0,234                 | -0,031               | 8                     | -0,031                 |
| biocarta_sprouty_regulation_of_tyrosine_kinase_signals_Main_Pathway                                                           | 0,010                      | -0,123                | 0,030                | 19                    | 0,020                  |
| biocarta_sprouty_regulation_of_tyrosine_kinase_signals_Pathway_(cell_migration)                                               | 0                          | 0                     | 0                    | 5                     | 0                      |
| biocarta_sprouty_regulation_of_tyrosine_kinase_signals_Pathway_(Pathway_protein_ubiquitination_of_CBL)                        | -0,008                     | -0,284                | 0,081                | 8                     | 0,036                  |
| biocarta_srebp_control_of_lipid_synthesis_Main_Pathway                                                                        | 0,036                      | -0,069                | -0,009               | 7                     | 0,014                  |
| biocarta_srebp_control_of_lipid_synthesis_Pathway_(cholesterol_biosynthetic_process)                                          | 0,036                      | -0,069                | -0,009               | 5                     | 0,014                  |
| biocarta_stat3_signaling_Main_Pathway                                                                                         | 0,048                      | -0,231                | 0,016                | 8                     | 0,032                  |
| biocarta_stathmin_and_breast_cancer_resistance_to_antimicrotubule_agents_Main_Pathway                                         | -0,016                     | 0,064                 | 0,004                | 24                    | -0,006                 |
| biocarta_stress_induction_of_hsp_regulation_Main_Pathway                                                                      | 0,054                      | -0,058                | 0,033                | 13                    | 0,044                  |
| biocarta_stress_induction_of_hsp_regulation_Pathway_(cell_survival)                                                           | 0,093                      | -0,185                | 0,064                | 5                     | 0,079                  |
| biocarta_stress_induction_of_hsp_regulation_Pathway_(Pathway_degradation_of_HSPB1)                                            | 0,093                      | -0,185                | 0,064                | 5                     | 0,079                  |
| biocarta_sumoylation_as_a_mechanism_to_modulate_ctbp_dependent_gene_responses_Main_Pathway                                    | -0,022                     | 0,033                 | -0,045               | 7                     | -0,033                 |
| biocarta_sumoylation_by_ranbp2_regulates_transcriptional_repression_Main_Pathway                                              | -0,026                     | 0,046                 | 0,021                | 14                    | -0,002                 |
| biocarta_t_cell_receptor_signaling_Main_Pathway                                                                               | -0,021                     | 0,012                 | 0,010                | 53                    | -0,005                 |
| biocarta_t_cell_receptor_signaling_Pathway_(Pathway_protein_ubiquitination_of_PRKCA)                                          | -0,020                     | 0,059                 | 0,006                | 4                     | -0,007                 |
| biocarta_tgf_beta_signaling_Main_Pathway                                                                                      | 0,001                      | -0,044                | 0,007                | 15                    | 0,004                  |
| biocarta_the_41bb_dependent_immune_response_Main_Pathway                                                                      | -0,007                     | 0,017                 | -0,007               | 13                    | -0,007                 |
| biocarta_the_co_stimulatory_signal_during_t_cell_activation_Main_Pathway                                                      | -0,030                     | 0,063                 | -0,012               | 18                    | -0,021                 |
| biocarta_the_co_stimulatory_signal_during_t_cell_activation_Pathway_(T_cell_activation)                                       | -0,030                     | 0,063                 | -0,012               | 18                    | -0,021                 |
| biocarta_the_igf_1_receptor_and_longevity_Main_Pathway                                                                        | -0,004                     | -0,050                | 0,024                | 15                    | 0,010                  |
| biocarta_the_igf_1_receptor_and_longevity_Pathway_(cell_survival)                                                             | 0,061                      | -0,196                | 0,050                | 6                     | 0,056                  |
| biocarta_the_igf_1_receptor_and_longevity_Pathway_(Pathway_degradation_of_CAT)                                                | 0,061                      | -0,196                | 0,050                | 6                     | 0,056                  |
| biocarta_the_igf_1_receptor_and_longevity_Pathway_(superoxide_release)                                                        | -0,048                     | 0,043                 | -0,010               | 6                     | -0,029                 |
| biocarta_the_prc2_complex_sets_long_term_gene_silencing_through_modification_of_histone_tails_Main_Pathway                    | -0,092                     | 0,114                 | 0,001                | 8                     | -0,046                 |
| biocarta_the_prc2_complex_sets_long_term_gene_silencing_through_modification_of_histone_tails_Pathway_(histone_deacetylation) | -0,092                     | 0,114                 | 0,001                | 8                     | -0,046                 |
| biocarta_the_prc2_complex_sets_long_term_gene_silencing_through_modification_of_histone_tails_Pathway_(histone_methylation)   | -0,092                     | 0,114                 | 0,001                | 8                     | -0,046                 |
| biocarta_thrombin_signaling_and_protease_activated_receptors_Main_Pathway                                                     | -0,020                     | -0,006                | 0,008                | 26                    | -0,006                 |
| biocarta_tnf_stress_related_signaling_Main_Pathway                                                                            | -0,000                     | -0,058                | 0,045                | 23                    | 0,022                  |
| biocarta_tnfr1_signaling_Main_Pathway                                                                                         | -0,036                     | -0,044                | 0,036                | 16                    | -0,000                 |
| biocarta_tnfr2_signaling_Main_Pathway                                                                                         | -0,006                     | -0,009                | 0,021                | 10                    | 0,007                  |
| biocarta_tnfr2_signaling_Pathway_(Pathway_protein_ubiquitination_of_MAP3K1_TNFAIP3_MAP3K14)                                   | -0,006                     | -0,009                | 0,021                | 10                    | 0,007                  |
| biocarta_toll_like_receptor_Main_Pathway                                                                                      | 0,001                      | -0,003                | 0,025                | 31                    | 0,013                  |
| biocarta_toll_like_receptor_Pathway_(Pathway_protein_ubiquitination_of_CHUK_MAP3K1)                                           | 0,010                      | 0,001                 | 0,031                | 10                    | 0,020                  |
| biocarta_tpo_signaling_Main_Pathway                                                                                           | 0,023                      | -0,044                | 0,031                | 24                    | 0,027                  |
| biocarta_transcription_factor_creb_and_its_extracellular_signals_Main_Pathway                                                 | -0,032                     | 0,009                 | 0,011                | 21                    | -0,010                 |
| biocarta_transcription_regulation_by_methyltransferase_of_carm1_Main_Pathway                                                  | -0,033                     | 0,047                 | 0,014                | 13                    | -0,009                 |
| biocarta_transcription_regulation_by_methyltransferase_of_carm1_Pathway_(histone_acetylation)                                 | 0,016                      | 0,012                 | 0,048                | 6                     | 0,032                  |
| biocarta_transcription_regulation_by_methyltransferase_of_carm1_Pathway_(histone_methylation)                                 | 0,016                      | 0,012                 | 0,048                | 6                     | 0,032                  |
| biocarta_transcriptional_activation_of_dbpb_from_mrna_Main_Pathway                                                            | -0,014                     | -0,004                | 0,097                | 3                     | 0,041                  |
| biocarta_trefoil_factors_initiate_mucosal_healing_Main_Pathway                                                                | -0,041                     | -0,025                | 0,018                | 20                    | -0,011                 |
| biocarta_trefoil_factors_initiate_mucosal_healing_Pathway_(Pathway_protein_ubiquitination_of_CHUK)                            | 0,018                      | -0,078                | 0,044                | 6                     | 0,031                  |
| biocarta_trka_receptor_signaling_Main_Pathway                                                                                 | -0,026                     | -0,077                | 0,044                | 13                    | 0,009                  |
| biocarta_trka_receptor_signaling_Pathway_(cell_growth_and_or_maintenance)                                                     | 0,015                      | -0,074                | 0,061                | 4                     | 0,038                  |

| Pathway                                                                                             | Tumour_MDA_MB.231_Invasive | Tumour_AU565_Invasive | Tumour_T47D_Invasive | Number of genes in PW | Mean (MDA_MB.231_T47D) |
|-----------------------------------------------------------------------------------------------------|----------------------------|-----------------------|----------------------|-----------------------|------------------------|
| biocarta_tsp_1_induced_apoptosis_in_microvascular_endothelial_cell_Main_Pathway                     | -0,029                     | 0,136                 | 0,041                | 7                     | 0,006                  |
| biocarta_tumor_suppressor_arf_inhibits_ribosomal_biogenesis_Main_Pathway                            | -0,065                     | 0,101                 | -0,004               | 15                    | -0,034                 |
| biocarta_tumor_suppressor_arf_inhibits_ribosomal_biogenesis_Pathway_(Pathway_degradation_of_CDKN2A) | 0                          | 0                     | 0                    | 1                     | 0                      |
| biocarta_tumor_suppressor_arf_inhibits_ribosomal_biogenesis_Pathway_(ribosome_biogenesis)           | -0,025                     | 0,052                 | 0,030                | 7                     | 0,003                  |
| biocarta_ucalpain_and_friends_in_cell_spread_Main_Pathway                                           | 0,097                      | -0,199                | 0,047                | 17                    | 0,072                  |
| biocarta_vegf_hypoxia_and_angiogenesis_Main_Pathway                                                 | -0,018                     | -0,055                | 0,038                | 27                    | 0,010                  |
| biocarta_vegf_hypoxia_and_angiogenesis_Pathway_(cell_migration)                                     | 0,009                      | -0,027                | 0,026                | 10                    | 0,018                  |
| biocarta_visceral_fat_deposits_and_the_metabolic_syndrome_Main_Pathway                              | 0,029                      | -0,480                | 0,271                | 8                     | 0,150                  |
| biocarta_west_nile_virus_Main_Pathway                                                               | -0,030                     | 0,100                 | -0,095               | 6                     | -0,063                 |
| biocarta_west_nile_virus_Pathway_(apoptosis)                                                        | -0,030                     | 0,100                 | -0,095               | 6                     | -0,063                 |
| biocarta_wnt_lrp6_signalling_Main_Pathway                                                           | 0                          | 0                     | 0                    | 5                     | 0                      |
| biocarta_wnt_signaling_Main_Pathway                                                                 | -0,022                     | -0,010                | -0,008               | 25                    | -0,015                 |
| biocarta_y_branching_of_actin_filaments_Main_Pathway                                                | 0,030                      | -0,142                | 0,029                | 16                    | 0,029                  |
| biocarta_yaci_and_bcma_stimulation_of_b_cell_immune_responses_Main_Pathway                          | -0,013                     | 0,097                 | 0,026                | 8                     | 0,007                  |
| biotin-carboxyl_carrier_protein_assembly                                                            | -0,183                     | 0,480                 | -0,047               | 3                     | -0,115                 |
| BRCA1_Pathway                                                                                       | -0,015                     | 0,043                 | -0,011               | 86                    | -0,013                 |
| BRCA1_Pathway_Base_Excision_Repair                                                                  | -0,096                     | -0,006                | 0,048                | 4                     | -0,024                 |
| BRCA1_Pathway_Cell_Cycle_Arrest_DNA_Repair_Genes_p21_WAF_CIP1_14-3-3_GADD45                         | -0,000                     | -0,041                | 0,062                | 4                     | 0,031                  |
| BRCA1_Pathway_Chromatin_Remodeling                                                                  | -0,022                     | 0,073                 | -0,021               | 33                    | -0,021                 |
| BRCA1_Pathway_E2_Responsive_Genes                                                                   | 0,003                      | -0,019                | 0,008                | 7                     | 0,006                  |
| BRCA1_Pathway_G1_S_arrest                                                                           | 0,066                      | -0,101                | 0,062                | 4                     | 0,064                  |
| BRCA1_Pathway_Growth_Promoting_Genes_hTert_S100A7                                                   | 0,066                      | -0,101                | 0,062                | 4                     | 0,064                  |
| BRCA1_Pathway_Homologous_Recombination_Repair                                                       | 0,037                      | -0,012                | -0,011               | 12                    | 0,013                  |
| BRCA1_Pathway_Mismatch_Repair                                                                       | -0,052                     | 0,151                 | 0,007                | 12                    | -0,022                 |
| BRCA1_Pathway_NHEJ_DSB_Repair                                                                       | 0,015                      | -0,008                | 0,011                | 7                     | 0,013                  |
| BRCA1_Pathway_Nucleotide_Excision_Repair                                                            | -0,113                     | 0,120                 | -0,008               | 4                     | -0,060                 |
| BRCA1_Pathway_Transcription_Coupled_Repair                                                          | 0,037                      | -0,090                | 0,040                | 4                     | 0,038                  |
| bupropion_degradation                                                                               | -0,053                     | 0,066                 | -0,020               | 5                     | -0,036                 |
| C20_prostanoid_biosynthesis                                                                         | -0,090                     | -0,158                | 0,171                | 9                     | 0,041                  |
| Calcium2+_Signaling                                                                                 | 0,050                      | -0,151                | 0,047                | 17                    | 0,048                  |
| cAMP_Pathway                                                                                        | -0,006                     | -0,018                | 0,005                | 559                   | -0,000                 |
| cAMP_Pathway_Axonal_Growth                                                                          | 0,008                      | 0,052                 | -0,007               | 22                    | 0,001                  |
| cAMP_Pathway_Cell_Growth                                                                            | -0,019                     | -0,007                | 0,006                | 58                    | -0,006                 |
| cAMP_Pathway_Cell_Proliferation                                                                     | -0,059                     | 0,053                 | -0,008               | 12                    | -0,034                 |
| cAMP_Pathway_Cell_Survival                                                                          | -0,079                     | 0,018                 | 0,003                | 84                    | -0,038                 |
| cAMP_Pathway_Chemotaxis                                                                             | -0,113                     | -0,009                | 0,013                | 58                    | -0,050                 |
| cAMP_Pathway_Cytokine_Production                                                                    | -0,021                     | 0,001                 | 0,008                | 61                    | -0,006                 |
| cAMP_Pathway_Degradation_of_Cell_Cycle_Regulators                                                   | 0,004                      | -0,076                | 0,001                | 22                    | 0,002                  |
| cAMP_Pathway_Endothelial_Cell_Regulation                                                            | -0,018                     | 0,021                 | -0,022               | 40                    | -0,020                 |
| cAMP_Pathway_eNOS_Signaling_Cardiovascular_Homeostasis                                              | -0,047                     | 0,037                 | -0,009               | 12                    | -0,028                 |
| cAMP_Pathway_Fatty_Acid_Metabolism                                                                  | -0,012                     | -0,020                | 0,008                | 74                    | -0,002                 |
| cAMP_Pathway_Gene_Expression_via_NFKB2_CREBBP_ELK1                                                  | 0,030                      | -0,072                | 0,040                | 31                    | 0,035                  |
| cAMP_Pathway_Glycogen_Synthesis                                                                     | -0,057                     | 0,077                 | -0,018               | 13                    | -0,038                 |
| cAMP_Pathway_Glycolysis                                                                             | -0,000                     | -0,026                | -0,044               | 11                    | -0,022                 |
| cAMP_Pathway_Lipolysis                                                                              | -0,047                     | 0,037                 | -0,009               | 12                    | -0,028                 |
| cAMP_Pathway_Metabolic_Energy                                                                       | -0,001                     | -0,013                | 0,014                | 27                    | 0,006                  |
| cAMP_Pathway_Myocardial_Contraction                                                                 | -0,005                     | 0,042                 | -0,013               | 112                   | -0,009                 |
| cAMP_Pathway_Oncogenesis                                                                            | -0,046                     | 0,043                 | -0,011               | 13                    | -0,029                 |
| cAMP_Pathway_Protein_Retention                                                                      | -0,026                     | 0,008                 | 0,003                | 14                    | -0,011                 |
| cAMP_Pathway_Regulation_of_Cytoskeleton                                                             | -0,025                     | 0,014                 | -0,011               | 14                    | -0,018                 |
| cardiolipin_biosynthesis                                                                            | 0,084                      | 0,038                 | 0,076                | 3                     | 0,080                  |
| carosine_biosynthesis                                                                               | 0                          | 0                     | 0                    | 1                     | 0                      |
| Caspase_Cascade_Pathway                                                                             | 0,025                      | 0,026                 | -0,013               | 364                   | 0,006                  |
| Caspase_Cascade_Pathway_Activated_Tissue_Trans-glutaminase                                          | -0,013                     | 0,047                 | -0,022               | 67                    | -0,017                 |
| Caspase_Cascade_Pathway_DNA_Fragmentation                                                           | -0,017                     | 0,218                 | -0,085               | 5                     | -0,051                 |

| Pathway                                                                                           | Tumour_MDA_MB.231_Invasive | Tumour_AU565_Invasive | Tumour_T47D_Invasive | Number of genes in PW | Mean (MDA_MB.231_T47D) |
|---------------------------------------------------------------------------------------------------|----------------------------|-----------------------|----------------------|-----------------------|------------------------|
| catecholamine_biosynthesis                                                                        | 0                          | 0                     | 0                    | 4                     | 0                      |
| CCR3_Pathway_in_Eosinophils                                                                       | 0,008                      | -0,079                | 0,025                | 66                    | 0,017                  |
| CD16_Pathway_in_Natural_Killer_cells                                                              | 0,016                      | -0,026                | 0,012                | 24                    | 0,014                  |
| CD40_Pathway                                                                                      | 0,041                      | -0,120                | 0,069                | 42                    | 0,055                  |
| CD40_Pathway_Cell_Survival                                                                        | 0,114                      | -0,349                | 0,174                | 3                     | 0,144                  |
| CD40_Pathway_Gene_Expression_Cell_Adhesion_Molecule_via_NFKB2                                     | 0,058                      | -0,260                | 0,115                | 13                    | 0,086                  |
| CD40_Pathway_Gene_Expression_Cell_Survival_via_NFKB2                                              | 0,058                      | -0,260                | 0,115                | 13                    | 0,086                  |
| CD40_Pathway_Gene_Expression_Co-Stimulatory_Molecules_via_NFKB2                                   | 0,058                      | -0,260                | 0,115                | 13                    | 0,086                  |
| CD40_Pathway_Gene_Expression_COX2_and_Prostaglandins_via_NFKB2                                    | 0,058                      | -0,260                | 0,115                | 13                    | 0,086                  |
| CD40_Pathway_Gene_Expression_Immunoglobulin_Class_Switch_via_NFKB2                                | 0,058                      | -0,260                | 0,115                | 13                    | 0,086                  |
| CD40_Pathway_Gene_Expression_Procoagulant_Activity_via_NFKB2                                      | 0,058                      | -0,260                | 0,115                | 13                    | 0,086                  |
| CD40_Pathway_Gene_Expression_Pro-Inflammatory_Cytokines_via_NFKB2                                 | 0,058                      | -0,260                | 0,115                | 13                    | 0,086                  |
| CDC42_Pathway                                                                                     | 0,027                      | -0,075                | 0,021                | 34                    | 0,024                  |
| CDK5_Pathway_in_Central_Nervous_System                                                            | -0,028                     | 0,027                 | 0,014                | 30                    | -0,007                 |
| CDK5_Signaling_in_Neurons                                                                         | 0,009                      | 0,047                 | -0,016               | 31                    | -0,003                 |
| CDP-diacylglycerol_biosynthesis                                                                   | -0,058                     | 0,022                 | 0,029                | 22                    | -0,015                 |
| Cell_Adhesion_Regulated_by_CDHs                                                                   | 0,029                      | -0,154                | 0,026                | 38                    | 0,027                  |
| Cell_Migration_Adhesion_and_Angiogenesis_driven_by_MMIF                                           | 0,016                      | -0,033                | 0,005                | 4                     | 0,010                  |
| Cellular_Apoptosis_Pathway                                                                        | 0,023                      | 0,023                 | -0,002               | 251                   | 0,011                  |
| Cellular_Apoptosis_Pathway_Depolarization                                                         | 0,010                      | -0,071                | 0,062                | 4                     | 0,036                  |
| Cellular_Apoptosis_Pathway_DNA_Fragmentation                                                      | 0,016                      | 0,073                 | -0,047               | 9                     | -0,016                 |
| Cellular_Apoptosis_Pathway_Gene_Expression_BAX_BID_BAK_Ras_Noxa_PUMA_APAF1_Survivin_BCL2_via_TP53 | 0,000                      | 0,028                 | 0,021                | 5                     | 0,011                  |
| ceramide_ide_novoi_biosynthesis                                                                   | -0,070                     | -0,158                | 0,045                | 7                     | -0,013                 |
| Chemokine_Ligand_2_Signaling                                                                      | 0,013                      | -0,102                | 0,044                | 23                    | 0,028                  |
| Chemokine_Pathway                                                                                 | 0,003                      | -0,027                | 0,014                | 203                   | 0,009                  |
| Chemokine_Pathway_Cell_Activation                                                                 | 0,016                      | -0,015                | 0,005                | 29                    | 0,010                  |
| Chemokine_Pathway_Gene_Expression_and_Apoptosis_via_ELK1                                          | 0,025                      | 0,017                 | 0,004                | 16                    | 0,014                  |
| Chemokine_Pathway_Internalization_Degradation_Recycling                                           | -0,026                     | -0,135                | 0,032                | 16                    | 0,003                  |
| Chemotaxis_Driven_by_C5a                                                                          | -0,006                     | -0,051                | 0,021                | 38                    | 0,008                  |
| Chemotaxis_Driven_by_CCL2                                                                         | -0,013                     | 0,060                 | 0,004                | 46                    | -0,004                 |
| Chemotaxis_Driven_by_CCR4                                                                         | 0,012                      | -0,123                | 0,037                | 45                    | 0,024                  |
| Chemotaxis_Driven_by_IL-8_and_LTB4                                                                | 0,020                      | -0,110                | 0,031                | 52                    | 0,025                  |
| Chemotaxis_of_Immune_Cells_During_Allergic_Asthma_and_Eczema_Driven_by_CCR4                       | 0,012                      | -0,123                | 0,037                | 45                    | 0,024                  |
| cholesterol_biosynthesis_I                                                                        | -0,026                     | -0,235                | 0,045                | 13                    | 0,009                  |
| cholesterol_biosynthesis_II_via_2425-dihydrostanosterol                                           | -0,026                     | -0,235                | 0,045                | 13                    | 0,009                  |
| cholesterol_biosynthesis_III_via_desmosterol                                                      | -0,026                     | -0,235                | 0,045                | 13                    | 0,009                  |
| choline_degradation                                                                               | -0,133                     | 0,197                 | 0,009                | 2                     | -0,062                 |
| chondroitin_and_dermatan_biosynthesis                                                             | 0                          | 0                     | 0                    | 5                     | 0                      |
| chondroitin_sulfate_biosynthesis                                                                  | -0,015                     | 0,007                 | 0,011                | 20                    | -0,002                 |
| chondroitin_sulfate_biosynthesis_late_stages                                                      | -0,026                     | -0,005                | 0,040                | 13                    | 0,007                  |
| chondroitin_sulfate_degradation_metazoa                                                           | -0,037                     | 0,193                 | -0,050               | 7                     | -0,044                 |
| Chromatin_Pathway                                                                                 | -0,051                     | 0,057                 | -0,026               | 15                    | -0,039                 |
| Circadian_Pathway                                                                                 | 0,011                      | 0,023                 | 0,006                | 12                    | 0,008                  |
| citrulline-nitric_oxide_cycle                                                                     | 0,009                      | 0,028                 | -0,094               | 5                     | -0,042                 |
| CMP_phosphorylation                                                                               | -0,000                     | -0,041                | -0,029               | 10                    | -0,015                 |
| CMP-iNi-acetylneuraminat_biosynthesis_I_eukaryotes                                                | 0,106                      | -0,305                | 0,040                | 4                     | 0,073                  |
| coenzyme_A_biosynthesis                                                                           | -0,035                     | 0,203                 | -0,055               | 6                     | -0,045                 |
| creatine_biosynthesis                                                                             | 0                          | 0                     | 0                    | 2                     | 0                      |
| creatine-phosphate_biosynthesis                                                                   | -0,020                     | 0,087                 | -0,032               | 5                     | -0,026                 |
| CREB_Pathway                                                                                      | -0,003                     | -0,033                | 0,009                | 301                   | 0,003                  |
| CXC_Chemokine_Receptor_Pathway                                                                    | -0,017                     | -0,017                | 0,013                | 55                    | -0,002                 |
| cysteine_biosynthesis                                                                             | -0,025                     | 0,085                 | -0,003               | 6                     | -0,014                 |
| cysteine_biosynthesis/homocysteine_degradation_trans-sulfuration                                  | 0                          | 0                     | 0                    | 2                     | 0                      |
| Cytokine_Network_Pathway                                                                          | -0,000                     | -0,005                | 0,003                | 35                    | 0,001                  |
| Cytoskeleton_Reorganization                                                                       | 0,038                      | -0,092                | 0,028                | 100                   | 0,033                  |
| dermatan_sulfate_biosynthesis                                                                     | 0,004                      | 0,001                 | -0,025               | 16                    | -0,011                 |
| dermatan_sulfate_biosynthesis_late_stages                                                         | -0,007                     | -0,046                | 0,001                | 4                     | -0,003                 |

| Pathway                                                                                                                                  | Tumour_MDA_MB.231_Invasive | Tumour_AU565_Invasive | Tumour_T47D_Invasive | Number of genes in PW | Mean (MDA_MB.231_T47D) |
|------------------------------------------------------------------------------------------------------------------------------------------|----------------------------|-----------------------|----------------------|-----------------------|------------------------|
| dermatan_sulfate_degradation_metazoa                                                                                                     | -0,064                     | 0,174                 | -0,058               | 6                     | -0,061                 |
| Development_of_Immune_Synapse                                                                                                            | 0,013                      | 0,000                 | -0,032               | 109                   | -0,010                 |
| D-galactose_degradation_V_Leloir_pathway                                                                                                 | 0,197                      | -0,155                | 0,151                | 6                     | 0,174                  |
| D-glucuronate_degradation                                                                                                                | 0                          | 0                     | 0                    | 2                     | 0                      |
| D-imyoi-inositol_134-trisphosphate_biosynthesis                                                                                          | -0,001                     | 0,096                 | -0,016               | 15                    | -0,009                 |
| D-imyoi-inositol_1456-tetrakisphosphate_biosynthesis                                                                                     | -0,098                     | -0,120                | -0,067               | 3                     | -0,083                 |
| D-imyoi-inositol_145-trisphosphate_biosynthesis                                                                                          | -0,150                     | 0,158                 | 0,009                | 26                    | -0,070                 |
| D-imyoi-inositol_145-trisphosphate_degradation                                                                                           | -0,012                     | 0,021                 | -0,023               | 13                    | -0,017                 |
| D-imyoi-inositol_3456-tetrakisphosphate_biosynthesis                                                                                     | -0,053                     | -0,052                | -0,024               | 2                     | -0,039                 |
| D-imyoi-inositol-5-phosphate_metabolism                                                                                                  | -0,182                     | 0,296                 | -0,033               | 19                    | -0,107                 |
| diphthamide_biosynthesis                                                                                                                 | 0,202                      | 0,000                 | 0,137                | 2                     | 0,169                  |
| D-mannose_degradation                                                                                                                    | -0,016                     | 0,360                 | -0,111               | 1                     | -0,063                 |
| dolichol_and_dolichyl_phosphate_biosynthesis                                                                                             | 0                          | 0                     | 0                    | 3                     | 0                      |
| dolichyl-diphosphooligosaccharide_biosynthesis                                                                                           | -0,518                     | 0,410                 | -0,036               | 10                    | -0,277                 |
| dopamine_degradation                                                                                                                     | -0,020                     | -0,154                | 0,004                | 5                     | -0,008                 |
| dTMP_ide_novoi_biosynthesis_mitochondrial                                                                                                | 0,222                      | -0,547                | 0,084                | 3                     | 0,153                  |
| EGF_Pathway                                                                                                                              | 0,005                      | -0,090                | 0,039                | 107                   | 0,022                  |
| EGF_Pathway_Actin_Cytoskeletal_Rearrangement                                                                                             | -0,033                     | -0,062                | 0,023                | 13                    | -0,005                 |
| EGF_Pathway_Cell_Motility                                                                                                                | -0,070                     | -0,391                | 0,106                | 4                     | 0,018                  |
| EGF_Pathway_Cell_Survival                                                                                                                | -0,015                     | -0,119                | 0,044                | 21                    | 0,015                  |
| EGF_Pathway_Cytoskeleton_Regulation                                                                                                      | -0,063                     | -0,412                | 0,170                | 9                     | 0,053                  |
| EGF_Pathway_EGFR_Endocytosis                                                                                                             | -0,068                     | -0,381                | 0,132                | 4                     | 0,032                  |
| EGF_Pathway_Gene_Expression_via_FOS_NFKB2_MYC_STAT1_ELK1_STAT3_JUN                                                                       | 0,055                      | -0,246                | 0,074                | 42                    | 0,065                  |
| EGF_Pathway_IP3_Signaling                                                                                                                | -0,097                     | -0,342                | 0,108                | 4                     | 0,006                  |
| EGF_Pathway_Rab5_Regulation_Pathway                                                                                                      | -0,135                     | 0,256                 | -0,045               | 3                     | -0,090                 |
| eicosapentaenoate_biosynthesis                                                                                                           | -0,018                     | -0,083                | 0,030                | 12                    | 0,006                  |
| Ephrin-B_Pathway                                                                                                                         | 0,009                      | -0,058                | 0,021                | 85                    | 0,015                  |
| Ephrin-mediated_Signaling_Events_During_Cell_Adhesion                                                                                    | -0,017                     | 0,025                 | -0,006               | 45                    | -0,011                 |
| epoxysqualene_biosynthesis                                                                                                               | 0,126                      | -0,351                | -0,026               | 2                     | 0,050                  |
| ErbB_Family_Pathway                                                                                                                      | -0,055                     | -0,024                | 0,024                | 87                    | -0,015                 |
| ErbB_Family_Pathway_Anti-Apoptosis                                                                                                       | 0,031                      | -0,082                | 0,036                | 4                     | 0,034                  |
| ErbB_Family_Pathway_Gene_Expression_via_JUN_FOS_ELK1                                                                                     | 0,009                      | 0,025                 | -0,002               | 31                    | 0,003                  |
| ErbB_Family_Pathway_Translation                                                                                                          | -1,510                     | -0,080                | 0,144                | 3                     | -0,683                 |
| ERK_Signaling_Pathway                                                                                                                    | 0,003                      | -0,029                | 0,010                | 620                   | 0,007                  |
| ERK_Signaling_Pathway_Cell_Survival                                                                                                      | -0,011                     | 0,057                 | -0,012               | 9                     | -0,012                 |
| ERK_Signaling_Pathway_EGFR_signaling                                                                                                     | 0,008                      | 0,034                 | -0,009               | 12                    | -0,000                 |
| ERK_Signaling_Pathway_Gene_Expression_via_CAPN6_TP53_FOS_ATF1_MYC_ELK3_MYLK_ETS1_SRF_HIST1H3B_CREB3_STAT3_NFKB2_HMGNI_ESR2_ELK1_PAX6_JUN | 0,015                      | -0,042                | 0,030                | 70                    | 0,022                  |
| ERK_Signaling_Pathway_Translation                                                                                                        | -0,006                     | 0,014                 | 0,006                | 15                    | -0,000                 |
| Erythropoietin_Pathway                                                                                                                   | 0,003                      | -0,031                | 0,021                | 159                   | 0,012                  |
| Erythropoietin_Pathway_Anti-Apoptosis                                                                                                    | 0,025                      | -0,019                | 0,007                | 15                    | 0,016                  |
| Erythropoietin_Pathway_BCLXL_Gene_Expression_via_STAT5B                                                                                  | 0,015                      | -0,057                | 0,011                | 7                     | 0,013                  |
| Erythropoietin_Pathway_Cell_Cycle_Progression                                                                                            | 0,054                      | -0,116                | 0,031                | 9                     | 0,043                  |
| Erythropoietin_Pathway_Cell_Survival                                                                                                     | -0,006                     | 0,007                 | 0,017                | 67                    | 0,005                  |
| Erythropoietin_Pathway_GPI_Hydrolysis_and_Ca2+_influx                                                                                    | 0,003                      | 0,020                 | 0,007                | 4                     | 0,005                  |
| estradiol_biosynthesis_I                                                                                                                 | -0,072                     | 0,111                 | -0,013               | 5                     | -0,042                 |
| estradiol_biosynthesis_II                                                                                                                | 0                          | 0                     | 0                    | 2                     | 0                      |
| Estrogen_Pathway                                                                                                                         | -0,006                     | -0,035                | 0,009                | 342                   | 0,001                  |
| Estrogen_Pathway_Anti-Apoptosis                                                                                                          | -0,023                     | -0,008                | 0,004                | 38                    | -0,009                 |
| Estrogen_Pathway_Gene_Expression_via_FOS_JUN_ELK1_SPI_POLR2B_CREB3_NFKB2                                                                 | -0,014                     | -0,004                | 0,002                | 119                   | -0,006                 |
| Estrogen_Pathway_Vasodilatation                                                                                                          | 0                          | 0                     | 0                    | 1                     | 0                      |
| ethanol_degradation_II                                                                                                                   | -0,154                     | 0,062                 | -0,038               | 6                     | -0,096                 |
| ethanol_degradation_IV                                                                                                                   | -0,139                     | 0,056                 | -0,036               | 6                     | -0,088                 |
| eumelanin_biosynthesis                                                                                                                   | 0                          | 0                     | 0                    | 4                     | 0                      |
| Extracellular_Matrix_Remodeling_during_Adhesion                                                                                          | 0,031                      | -0,199                | 0,059                | 48                    | 0,045                  |
| FAK_Pathway                                                                                                                              | 0,014                      | -0,012                | 0,015                | 68                    | 0,014                  |
| fatty_acid_activation                                                                                                                    | -0,082                     | 0,019                 | 0,025                | 8                     | -0,028                 |

| Pathway                                                                                   | Tumour_MDA_MB.231_Invasive | Tumour_AU565_Invasive | Tumour_T47D_Invasive | Number of genes in PW | Mean (MDA_MB.231_T47D) |
|-------------------------------------------------------------------------------------------|----------------------------|-----------------------|----------------------|-----------------------|------------------------|
| fatty_acid_alpha-oxidation                                                                | -0,083                     | -0,182                | -0,033               | 5                     | -0,058                 |
| fatty_acid_alpha-oxidation_III                                                            | -0,054                     | -0,142                | -0,030               | 3                     | -0,042                 |
| fatty_acid_beta-oxidation                                                                 | -0,097                     | 0,025                 | -0,026               | 16                    | -0,061                 |
| fatty_acid_beta-oxidation_peroxisome                                                      | -0,092                     | 0,050                 | 0,008                | 15                    | -0,042                 |
| fatty_acid_beta-oxidation_unsaturated_odd_number                                          | -0,103                     | 0,032                 | -0,093               | 3                     | -0,098                 |
| fatty_acid_biosynthesis_initiation                                                        | -0,046                     | 0,167                 | 0,014                | 4                     | -0,016                 |
| fatty_acid_elongation_-_saturated                                                         | -0,000                     | 0,224                 | 0,007                | 2                     | 0,003                  |
| FCGR3A-mediated_phagocytosis                                                              | 0,004                      | 0,130                 | -0,011               | 32                    | -0,003                 |
| FGF2_Signaling_in_Epithelial-mesenchymal_transition                                       | 0,014                      | 0,005                 | 0,010                | 7                     | 0,012                  |
| FGFR_Signaling                                                                            | -0,014                     | 0,032                 | 0,001                | 51                    | -0,006                 |
| flavin_biosynthesis                                                                       | 0,141                      | -0,277                | 0,112                | 2                     | 0,126                  |
| FLT3_Signaling_Pathway                                                                    | -0,060                     | -0,033                | 0,034                | 73                    | -0,013                 |
| FLT3_Signaling_Pathway_Transcription_via_ELK3_MAPK12_CREB3_STAT2                          | -0,092                     | -0,084                | 0,059                | 45                    | -0,017                 |
| FLT3_Signaling_Pathway_Translation                                                        | -0,032                     | -0,031                | 0,039                | 8                     | 0,003                  |
| FN1_Influence_on_Cell_Motility_via_Integrins                                              | 0,052                      | -0,161                | 0,057                | 34                    | 0,054                  |
| folate_polyglutamylation                                                                  | -0,013                     | -0,013                | 0,017                | 5                     | 0,002                  |
| folate_transformations                                                                    | 0,015                      | -0,003                | 0,017                | 11                    | 0,016                  |
| formaldehyde_oxidation                                                                    | 0,095                      | 0,268                 | -0,046               | 2                     | 0,025                  |
| fructose_26-bisphosphate_synthesisdephosphorylation                                       | 0                          | 0                     | 0                    | 5                     | 0                      |
| GABA_shunt                                                                                | -0,268                     | 0,149                 | 0,088                | 7                     | -0,090                 |
| Gamma-Aminobutyric_Acid_A_Receptor_Pathway                                                | -0,064                     | -0,039                | -0,006               | 15                    | -0,035                 |
| gamma-glutamyl_cycle                                                                      | -0,016                     | 0,119                 | -0,023               | 8                     | -0,020                 |
| gamma-linolenate_biosynthesis                                                             | -0,037                     | -0,028                | 0,021                | 14                    | -0,008                 |
| GDP-glucose_biosynthesis_II                                                               | 0,005                      | -0,101                | 0,003                | 6                     | 0,004                  |
| GDP-L-fucose_biosynthesis_I_from_GDP-D-mannose                                            | -0,227                     | 0,593                 | -0,010               | 2                     | -0,118                 |
| GDP-L-fucose_biosynthesis_II_from_L-fucose                                                | 0                          | 0                     | 0                    | 2                     | 0                      |
| GDP-mannose_biosynthesis                                                                  | 0,031                      | 0,111                 | -0,008               | 6                     | 0,011                  |
| geranylgeranyldiphosphate_biosynthesis                                                    | 0,115                      | -0,197                | -0,009               | 1                     | 0,053                  |
| glucocorticoid_biosynthesis                                                               | 0                          | 0                     | 0                    | 3                     | 0                      |
| Glucocorticoid_Receptor_Signaling_Pathway                                                 | 0,014                      | 0,003                 | -0,006               | 211                   | 0,004                  |
| Glucocorticoid_Receptor_Signaling_Pathway_Cell_Cycle_Arrest                               | 0,029                      | -0,480                | 0,271                | 3                     | 0,150                  |
| Glucocorticoid_Receptor_Signaling_Pathway_Cell_Cycle_Progression                          | -0,048                     | 0,038                 | 0,017                | 29                    | -0,016                 |
| Glucocorticoid_Receptor_Signaling_Pathway_Gene_Expression_via_CREB3_STAT5B_SLC22A2_POU2F1 | -0,046                     | 0,043                 | 0,013                | 36                    | -0,016                 |
| Glucocorticoid_Receptor_Signaling_Pathway_Histone_Deacetylation                           | -0,004                     | 0,029                 | 0,034                | 17                    | 0,015                  |
| Glucocorticoid_Receptor_Signaling_Pathway_Inflammatory_Cytokines                          | 0,035                      | -0,012                | -0,014               | 72                    | 0,011                  |
| gluconeogenesis                                                                           | -0,021                     | 0,027                 | 0,009                | 24                    | -0,006                 |
| glutamate_biosynthesisdegradation                                                         | 0                          | 0                     | 0                    | 2                     | 0                      |
| glutamate_dependent_acid_resistance                                                       | 0,052                      | -0,208                | -0,045               | 3                     | 0,003                  |
| glutamate_removal_from_folates                                                            | -0,408                     | 0,629                 | -0,373               | 1                     | -0,390                 |
| glutamine_biosynthesis                                                                    | 0,156                      | -0,625                | -0,135               | 1                     | 0,010                  |
| glutamine_degradationglutamate_biosynthesis                                               | -0,184                     | -0,521                | 0,168                | 2                     | -0,008                 |
| glutaryl-CoA_degradation                                                                  | -0,081                     | -0,062                | -0,046               | 4                     | -0,064                 |
| glutathione_biosynthesis                                                                  | -0,010                     | 0,234                 | -0,050               | 3                     | -0,030                 |
| glutathione_redox_reactions_I                                                             | -0,133                     | 0,207                 | -0,006               | 6                     | -0,069                 |
| glutathione_redox_reactions_II                                                            | 0,068                      | 0,089                 | -0,047               | 1                     | 0,010                  |
| glutathione-mediated_detoxification                                                       | -0,064                     | 0,137                 | -0,026               | 21                    | -0,045                 |
| glycerol_degradation                                                                      | -0,069                     | 0,168                 | 0,033                | 5                     | -0,018                 |
| glycerol-3-phosphate_shuttle                                                              | 0                          | 0                     | 0                    | 2                     | 0                      |
| glycine_betaine_degradation                                                               | 0                          | 0                     | 0                    | 5                     | 0                      |
| glycine_biosynthesisdegradation                                                           | 0                          | 0                     | 0                    | 2                     | 0                      |
| glycine_cleavage                                                                          | 0                          | 0                     | 0                    | 3                     | 0                      |
| glycineserine_biosynthesis                                                                | 0                          | 0                     | 0                    | 2                     | 0                      |
| glycoaminoglycan-protein_linkage_region_biosynthesis                                      | 0,011                      | 0,028                 | -0,048               | 7                     | -0,019                 |
| glycogen_biosynthesis                                                                     | 0,047                      | -0,017                | 0,023                | 8                     | 0,035                  |
| glycogenolysis                                                                            | 0,067                      | -0,036                | -0,017               | 9                     | 0,025                  |
| glycolysis                                                                                | 0,060                      | 0,017                 | -0,002               | 24                    | 0,029                  |
| GNAQ_Signaling_Events                                                                     | 0,012                      | -0,106                | 0,050                | 8                     | 0,031                  |
| GPCR_Pathway                                                                              | -0,006                     | -0,046                | 0,019                | 265                   | 0,006                  |

| Pathway                                                                                | Tumour_MDA_MB.231_Invasive | Tumour_AU565_Invasive | Tumour_T47D_Invasive | Number of genes in PW | Mean (MDA_MB.231_T47D) |
|----------------------------------------------------------------------------------------|----------------------------|-----------------------|----------------------|-----------------------|------------------------|
| GPCR_Pathway_Gene_Expression_via_JUN_NFKB2_ELK1_SRF_FOS_CREB3                          | 0,000                      | -0,052                | 0,038                | 90                    | 0,019                  |
| Growth_Hormone_Signaling_Pathway                                                       | 0,019                      | -0,020                | 0,005                | 66                    | 0,012                  |
| Growth_Hormone_Signaling_Pathway_Cell_Survival                                         | 0,009                      | 0,019                 | 0,002                | 19                    | 0,005                  |
| Growth_Hormone_Signaling_Pathway_Gene_Expression_via_SRF_ELK1_STAT5B_CEBPD_STAT1_STAT3 | 0,021                      | -0,022                | 0,005                | 59                    | 0,013                  |
| Growth_Hormone_Signaling_Pathway_Glucose_Uptake                                        | 0,010                      | 0,024                 | 0,001                | 16                    | 0,005                  |
| Growth_Hormone_Signaling_Pathway_Protein_Synthesis                                     | 0                          | 0                     | 0                    | 4                     | 0                      |
| GSK3_Signaling_Pathway                                                                 | -0,002                     | 0,034                 | -0,010               | 295                   | -0,006                 |
| GSK3_Signaling_Pathway_b-CTNN_Degradation                                              | -0,017                     | 0,028                 | 0,000                | 30                    | -0,008                 |
| GSK3_Signaling_Pathway_Gene_Expression_via_CTNNB1                                      | -0,006                     | 0,005                 | -0,006               | 90                    | -0,006                 |
| GSK3_Signaling_Pathway_Glycogen_Synthesis                                              | -0,010                     | -0,011                | -0,007               | 34                    | -0,008                 |
| GSK3_Signaling_Pathway_Protein_Synthesis                                               | -0,005                     | -0,050                | 0,004                | 37                    | -0,000                 |
| guanine_and_guanosine_salvage                                                          | -0,018                     | 0,072                 | -0,033               | 2                     | -0,025                 |
| guanosine_deoxyribonucleotides_ide_novoi_biosynthesis                                  | -0,022                     | 0,044                 | -0,027               | 11                    | -0,024                 |
| guanosine_nucleotides_degradation                                                      | -0,004                     | 0,066                 | 0,006                | 4                     | 0,001                  |
| guanosine_nucleotides_ide_novoi_biosynthesis                                           | -0,029                     | 0,052                 | -0,029               | 15                    | -0,029                 |
| guanosine_ribonucleotides_ide_novoi_biosynthesis                                       | -0,027                     | 0,013                 | -0,040               | 12                    | -0,033                 |
| HA_syntesis_pathway                                                                    | 0,020                      | -0,082                | 0,033                | 24                    | 0,027                  |
| Hedgehog_Signaling_in_Mammals_no_Tubulin_Pathway                                       | -0,008                     | -0,042                | 0,015                | 102                   | 0,004                  |
| Hedgehog_Signaling_in_Mammals_Pathway                                                  | -0,027                     | -0,019                | 0,009                | 102                   | -0,009                 |
| heme_biosynthesis                                                                      | -0,010                     | 0,001                 | -0,014               | 9                     | -0,012                 |
| heme_biosynthesis_from_uroporphyrinogen-III_I                                          | -0,056                     | -0,039                | 0,015                | 4                     | -0,021                 |
| heme_degradation                                                                       | 0,051                      | -0,187                | 0,069                | 4                     | 0,060                  |
| heparan_sulfate_biosynthesis                                                           | -0,006                     | 0,028                 | -0,018               | 28                    | -0,012                 |
| heparan_sulfate_biosynthesis_late_stages                                               | -0,012                     | 0,027                 | -0,008               | 21                    | -0,010                 |
| HGF_Pathway                                                                            | -0,002                     | -0,037                | 0,022                | 95                    | 0,010                  |
| HGF_Pathway_Anoikis                                                                    | 0,013                      | 0,018                 | 0,011                | 29                    | 0,012                  |
| HGF_Pathway_Cell_Adhesion_and_Cell_Migration                                           | -0,017                     | -0,065                | 0,022                | 31                    | 0,002                  |
| HGF_Pathway_Cell_Cycle_Progression                                                     | 0,029                      | -0,022                | 0,026                | 15                    | 0,027                  |
| HGF_Pathway_Cell_Scattering                                                            | 0,016                      | -0,056                | -0,002               | 16                    | 0,007                  |
| HGF_Pathway_Cell_Survival                                                              | 0,016                      | -0,056                | -0,002               | 16                    | 0,007                  |
| HGF_Pathway_Gene_Expression_via_JUN_STAT3_FOS_ELK1_ETS2                                | 0,055                      | -0,158                | 0,047                | 17                    | 0,051                  |
| HGF_Pathway_IP3_Pathway                                                                | 0,010                      | -0,265                | -0,010               | 4                     | 0,000                  |
| HGF_Pathway_PKC_Pathway                                                                | 0,001                      | -0,167                | -0,000               | 6                     | 0,000                  |
| HGF_Pathway_Regulation_of_Cytoskeleton_Cell_Polarity_and_Cell_Motility                 | -0,040                     | 0,026                 | 0,039                | 13                    | -0,000                 |
| HIF1Alpha_Pathway                                                                      | -0,000                     | -0,018                | 0,003                | 54                    | 0,001                  |
| HIF1Alpha_Pathway_Gene_Expression_via_JUN_CREB3                                        | 0,016                      | -0,038                | 0,013                | 25                    | 0,014                  |
| HIF1Alpha_Pathway_HIF1a_Degradation                                                    | 0,043                      | -0,129                | -0,007               | 1                     | 0,018                  |
| HIF1Alpha_Pathway_NOS_Pathway                                                          | 0,027                      | -0,064                | 0,018                | 21                    | 0,023                  |
| HIF1Alpha_Pathway_p53_Hypoxia_Pathway                                                  | 0,004                      | -0,031                | 0,005                | 31                    | 0,005                  |
| HIF1Alpha_Pathway_VEGF_Pathway                                                         | 0,027                      | -0,064                | 0,018                | 24                    | 0,023                  |
| histamine_biosynthesis                                                                 | 0                          | 0                     | 0                    | 1                     | 0                      |
| histamine_degradation                                                                  | 0                          | 0                     | 0                    | 2                     | 0                      |
| histidine_degradation                                                                  | 0,014                      | -0,014                | 0,006                | 5                     | 0,010                  |
| HMGB1_signaling_through_RAGE                                                           | 0,028                      | -0,018                | 0,016                | 45                    | 0,022                  |
| homocarnosine_biosynthesis                                                             | 0                          | 0                     | 0                    | 1                     | 0                      |
| hydrogen_sulfide_biosynthesis_trans-sulfuration                                        | 0                          | 0                     | 0                    | 2                     | 0                      |
| Hypoxia_induced_EMT_in_cancer_and_fibrosis_3_copy                                      | -0,027                     | -0,161                | 0,032                | 9                     | 0,003                  |
| hypusine_biosynthesis                                                                  | 0,005                      | 0,109                 | -0,043               | 2                     | -0,019                 |
| ICOS_signaling_in_T-helper_cells                                                       | 0,002                      | -0,032                | 0,014                | 16                    | 0,008                  |
| IGF1R_Signaling_Pathway                                                                | -0,021                     | -0,031                | 0,025                | 173                   | 0,002                  |
| IGF1R_Signaling_Pathway_Apoptosis                                                      | 0,035                      | -0,026                | -0,006               | 12                    | 0,014                  |
| IGF1R_Signaling_Pathway_Cell_Migration                                                 | -0,015                     | -0,050                | 0,016                | 36                    | 0,000                  |
| IGF1R_Signaling_Pathway_Cell_Proliferation_Differentiation_and_Apoptosis               | 0,017                      | -0,049                | 0,054                | 21                    | 0,035                  |
| IGF1R_Signaling_Pathway_Cell_Survival                                                  | 0,044                      | 0,029                 | 0,000                | 12                    | 0,022                  |
| IGF1R_Signaling_Pathway_Gene_Expression_Proliferation_Growth_Survival_via_NFAT5_CREB3  | -0,031                     | 0,021                 | 0,009                | 24                    | -0,011                 |
| IGF1R_Signaling_Pathway_Glucose_Uptake                                                 | 0,037                      | 0,022                 | -0,033               | 4                     | 0,002                  |
| IGF1R_Signaling_Pathway_Glycogen_Synthesis                                             | 0,005                      | -0,005                | 0,001                | 6                     | 0,003                  |

| Pathway                                                                                                         | Tumour_MDA_MB.231_Invasive | Tumour_AU565_Invasive | Tumour_T47D_Invasive | Number of genes in PW | Mean (MDA_MB.231_T47D) |
|-----------------------------------------------------------------------------------------------------------------|----------------------------|-----------------------|----------------------|-----------------------|------------------------|
| IGF1R_Signaling_Pathway_Protein_Synthesis                                                                       | -0,220                     | 0,049                 | 0,009                | 20                    | -0,106                 |
| IL-10_Pathway                                                                                                   | 0,029                      | -0,109                | 0,046                | 40                    | 0,038                  |
| IL-10_Pathway_IL-10_Responsive_Genes_Transcription_of_BCLXL_Cyclin-D1_D2_D3_Pim1_c-Myc_and_P19(INK4D)_via_STAT3 | 0,014                      | -0,044                | 0,012                | 23                    | 0,013                  |
| IL-10_Pathway_Inflammatory_Cytokine_Genes_Expression_via_STAT3                                                  | 0,014                      | -0,044                | 0,012                | 23                    | 0,013                  |
| IL-10_Pathway_Stability_Determination                                                                           | 0                          | 0                     | 0                    | 3                     | 0                      |
| IL-10_Pathway_Translational_Modulation                                                                          | -0,020                     | 0,045                 | 0,019                | 10                    | -0,001                 |
| IL-2_Pathway                                                                                                    | -0,055                     | 0,077                 | -0,012               | 148                   | -0,034                 |
| IL-2_Pathway_Actin_Reorganization                                                                               | -0,024                     | 0,115                 | 0,001                | 9                     | -0,011                 |
| IL-2_Pathway_Apoptosis                                                                                          | -0,136                     | 0,191                 | -0,058               | 3                     | -0,097                 |
| IL-2_Pathway_Apoptosis_Inhibition                                                                               | 0,011                      | 0,025                 | 0,001                | 15                    | 0,006                  |
| IL-2_Pathway_Gene_Expression_via_FYN_LYN_RPS6KB1_PTK2B                                                          | -0,321                     | 0,251                 | 0,017                | 14                    | -0,152                 |
| IL-2_Pathway_IL2_Gene_Expression_via_POLR1E_EGR1_HMGA1_ELF1_POU2F1_MYC                                          | -0,005                     | -0,033                | 0,052                | 45                    | 0,023                  |
| IL-2_Pathway_Protein_Synthesis                                                                                  | 0,031                      | -0,166                | -0,000               | 7                     | 0,015                  |
| IL-6_Pathway                                                                                                    | 0,014                      | -0,051                | 0,024                | 209                   | 0,019                  |
| ILK_Signaling_Pathway                                                                                           | 0,007                      | -0,041                | 0,014                | 507                   | 0,011                  |
| ILK_Signaling_Pathway_Actin_Polymerization_Cytoskeletal_Reorganization                                          | 0,104                      | -0,095                | 0,080                | 59                    | 0,092                  |
| ILK_Signaling_Pathway_Apoptosis                                                                                 | 0,016                      | 0,006                 | -0,010               | 8                     | 0,003                  |
| ILK_Signaling_Pathway_Cell_Adhesion                                                                             | 0                          | 0                     | 0                    | 3                     | 0                      |
| ILK_Signaling_Pathway_Cell_Cycle_Proliferation                                                                  | -0,009                     | -0,031                | 0,014                | 41                    | 0,002                  |
| ILK_Signaling_Pathway_Cell_Migration_Retraction                                                                 | -0,009                     | -0,029                | 0,015                | 41                    | 0,003                  |
| ILK_Signaling_Pathway_Cell_Motility                                                                             | 0,086                      | -0,079                | 0,066                | 62                    | 0,076                  |
| ILK_Signaling_Pathway_Cytoskeletal_Adhesion_Complexes                                                           | 0,003                      | -0,048                | 0,015                | 118                   | 0,009                  |
| ILK_Signaling_Pathway_Epithelial_Mesenchymal_Transition                                                         | -0,015                     | 0,072                 | -0,033               | 31                    | -0,024                 |
| ILK_Signaling_Pathway_Epithelial_Mesenchymal_Transition_Tubulo-Interstitial_Fibrosis                            | 0,008                      | -0,044                | 0,013                | 137                   | 0,010                  |
| ILK_Signaling_Pathway_G2_Phase_Arrest                                                                           | -0,009                     | -0,031                | 0,014                | 41                    | 0,002                  |
| ILK_Signaling_Pathway_Induced_Cell_Proliferation                                                                | -0,025                     | -0,054                | -0,003               | 10                    | -0,014                 |
| ILK_Signaling_Pathway_Loss_of_Occludin_Barrier_Dysfunction                                                      | 0,008                      | -0,058                | 0,028                | 37                    | 0,018                  |
| ILK_Signaling_Pathway_Migration_Vasculogenesis                                                                  | 0,008                      | -0,044                | 0,013                | 137                   | 0,010                  |
| ILK_Signaling_Pathway_MMP2_MMP9_Gene_Expression_Tissue_Invasion_via_FOS                                         | -0,007                     | -0,015                | 0,045                | 24                    | 0,019                  |
| ILK_Signaling_Pathway_Opsonization                                                                              | 0                          | 0                     | 0                    | 3                     | 0                      |
| ILK_Signaling_Pathway_Regulation_of_Intermediate_Filaments                                                      | 0                          | 0                     | 0                    | 1                     | 0                      |
| ILK_Signaling_Pathway_Regulation_of_Junction_Assembly_at_Desmosomes                                             | 0                          | 0                     | 0                    | 3                     | 0                      |
| ILK_Signaling_Pathway_Tissue_Morphogenesis                                                                      | -0,007                     | -0,015                | 0,045                | 24                    | 0,019                  |
| ILK_Signaling_Pathway_Tumor_Angiogenesis                                                                        | 0                          | 0                     | 0                    | 6                     | 0                      |
| ILK_Signaling_Pathway_Wound_Healing                                                                             | 0                          | 0                     | 0                    | 3                     | 0                      |
| imyoi-inositol_ide_novoi_biosynthesis                                                                           | 0,183                      | -0,379                | 0,067                | 3                     | 0,125                  |
| iNi-acetylglucosamine_degradation_I                                                                             | 0,013                      | 0,190                 | -0,021               | 3                     | -0,004                 |
| iNi-acetylglucosamine_degradation_II                                                                            | 0,057                      | 0,036                 | 0,001                | 4                     | 0,029                  |
| inosine-5-phosphate_biosynthesis                                                                                | 0,058                      | 0,145                 | -0,004               | 3                     | 0,027                  |
| inositol_pyrophosphates_biosynthesis                                                                            | -0,006                     | 0,018                 | -0,001               | 7                     | -0,003                 |
| Inside-out_Signaling_through_Integrins                                                                          | -0,009                     | -0,057                | 0,023                | 67                    | 0,007                  |
| Integrin-based_Cell_Migration_and_Adhesion                                                                      | 0,064                      | -0,144                | 0,035                | 73                    | 0,049                  |
| Integrins_Function_in_Carcinoma_Progression                                                                     | 0,002                      | -0,107                | 0,014                | 49                    | 0,008                  |
| Integrins_Signaling_in_Natural_Killer_Cells                                                                     | -0,019                     | 0,109                 | 0,007                | 44                    | -0,006                 |
| Interferon_Pathway                                                                                              | -0,049                     | -0,014                | -0,001               | 99                    | -0,025                 |
| Interferon_Pathway_Gene_Expression_via_HIST1H3B_CREB3                                                           | -0,022                     | 0,023                 | 0,009                | 24                    | -0,006                 |
| Interferon_Pathway_Transcription                                                                                | 0,036                      | -0,091                | 0,002                | 23                    | 0,019                  |
| Interferon_Pathway_Translation                                                                                  | -0,907                     | 0,160                 | 0,031                | 5                     | -0,438                 |
| Interleukin-8-induced_Cell_Adhesion_and_Migration                                                               | -0,008                     | 0,025                 | -0,005               | 18                    | -0,007                 |
| Intermediate_Filaments_in_Epithelial_Cells                                                                      | -0,018                     | 0,085                 | -0,018               | 15                    | -0,018                 |
| IP3_Pathway                                                                                                     | -0,009                     | -0,022                | 0,014                | 175                   | 0,002                  |
| IP3_Pathway_Gene_Expression_via_CREB3_NFATC2_MEF2D                                                              | 0,004                      | 0,019                 | 0,013                | 27                    | 0,008                  |
| iron-sulfur_cluster_biosynthesis                                                                                | -0,240                     | -0,175                | 0,219                | 1                     | -0,010                 |
| iSi-methyl-5-thioadenosine_degradation                                                                          | -0,076                     | 0,376                 | -0,119               | 1                     | -0,097                 |
| iSi-methyl-5-thio-alpha-D-ribose_1-phosphate_degradation                                                        | -0,082                     | 0,371                 | 0,005                | 4                     | -0,039                 |
| isoleucine_degradation                                                                                          | -0,116                     | 0,020                 | -0,074               | 12                    | -0,095                 |

| Pathway                                                                                                                                                                    | Tumour_MDA_MB.231_Invasive | Tumour_AU565_Invasive | Tumour_T47D_Invasive | Number of genes in PW | Mean (MDA_MB.231_T47D) |
|----------------------------------------------------------------------------------------------------------------------------------------------------------------------------|----------------------------|-----------------------|----------------------|-----------------------|------------------------|
| ITGA4-mediated_Cell_Adhesion_and_Migration                                                                                                                                 | 0,047                      | -0,095                | 0,007                | 24                    | 0,027                  |
| itrans_transi-farnesyl_diphosphate_biosynthesis                                                                                                                            | 0,108                      | -0,139                | 0,016                | 4                     | 0,062                  |
| JAK-STAT_Pathway                                                                                                                                                           | -0,008                     | -0,031                | 0,014                | 324                   | 0,003                  |
| JAK-STAT_Pathway_Akt_Pathway                                                                                                                                               | 0,025                      | -0,055                | 0,001                | 18                    | 0,013                  |
| JAK-STAT_Pathway_Gene_Expression_via_MYC                                                                                                                                   | 0,040                      | -0,249                | 0,001                | 5                     | 0,021                  |
| JAK-STAT_Pathway_IFN-Inducible_Gene_Expression_via_STAT2_STAT1                                                                                                             | 0,020                      | -0,072                | 0,000                | 30                    | 0,010                  |
| JAK-STAT_Pathway_JAK_Degradation                                                                                                                                           | 0,017                      | -0,028                | -0,000               | 30                    | 0,008                  |
| JAK-STAT_Pathway_Nml_SOCS_BCL-XL_p21_Myc_Nos2_Gene_Expression_via_STAT2                                                                                                    | -0,012                     | -0,030                | 0,008                | 241                   | -0,002                 |
| JNK_Pathway                                                                                                                                                                | -0,019                     | -0,004                | 0,010                | 306                   | -0,005                 |
| JNK_Pathway_Gene_Expression_Apoptosis_Inflammation_Tumorigenesis_Cell_Migration_via_SMAD4_STAT4_HSF1_TP53_MAP2_DCX_ATF2_NFATC3_SPIRE1_MAP1B_TCF15_ELK1_BCL2_JUN_PXN_NFATC2 | -0,000                     | -0,036                | 0,024                | 56                    | 0,012                  |
| JNK_Pathway_Insulin_Signaling                                                                                                                                              | 0,041                      | -0,089                | 0,032                | 18                    | 0,036                  |
| Junctional_Cell_Adhesion_in_Endothelium                                                                                                                                    | 0,020                      | -0,050                | 0,016                | 31                    | 0,018                  |
| KEGG_ABC_transporters_Main_Pathway                                                                                                                                         | -0,026                     | 0,028                 | 0,012                | 44                    | -0,007                 |
| KEGG_Acute_myeloid_leukemia_Main_Pathway                                                                                                                                   | -0,112                     | 0,031                 | 0,020                | 49                    | -0,046                 |
| KEGG_Adherens_junction_Main_Pathway                                                                                                                                        | -0,018                     | 0,091                 | -0,036               | 60                    | -0,027                 |
| KEGG_Adipocytokine_signaling_Main_Pathway                                                                                                                                  | -0,004                     | 0,008                 | 0,011                | 33                    | 0,004                  |
| KEGG_Adrenergic_signaling_in_cardiomyocytes_Main_Pathway                                                                                                                   | 0,001                      | -0,020                | 0,009                | 148                   | 0,005                  |
| KEGG_African_trypanosomiasis_Main_Pathway                                                                                                                                  | 0,007                      | -0,077                | 0,029                | 9                     | 0,018                  |
| KEGG_Alanine_aspartate_and_glutamate_metabolism_Main_Pathway                                                                                                               | -0,062                     | 0,030                 | -0,012               | 31                    | -0,037                 |
| KEGG_Alcoholism_Main_Pathway                                                                                                                                               | -0,007                     | -0,008                | 0,012                | 76                    | 0,002                  |
| KEGG_Aldosterone_regulated_sodium_reabsorption_Main_Pathway                                                                                                                | -0,030                     | 0,307                 | -0,067               | 22                    | -0,049                 |
| KEGG_Allograft_rejection_Main_Pathway                                                                                                                                      | 0                          | 0                     | 0                    | 2                     | 0                      |
| KEGG_alpha_Linolenic_acid_metabolism_Main_Pathway                                                                                                                          | 0,013                      | -0,063                | 0,012                | 22                    | 0,013                  |
| KEGG_Alzheimer_s_disease_Main_Pathway                                                                                                                                      | 0,000                      | 0,082                 | 0,018                | 6                     | 0,009                  |
| KEGG_Amino_sugar_and_nucleotide_sugar_metabolism_Main_Pathway                                                                                                              | 0,026                      | 0,062                 | 0,013                | 43                    | 0,020                  |
| KEGG_Aminoacyl_tRNA_biosynthesis_Main_Pathway                                                                                                                              | -0,115                     | 0,158                 | -0,005               | 5                     | -0,060                 |
| KEGG_Amoebiasis_Main_Pathway                                                                                                                                               | -0,043                     | 0,049                 | -0,014               | 9                     | -0,029                 |
| KEGG_Amphetamine_addiction_Main_Pathway                                                                                                                                    | 0,005                      | 0,035                 | 0,004                | 34                    | 0,005                  |
| KEGG_AMPK_signaling_Main_Pathway                                                                                                                                           | 0,046                      | 0,008                 | -0,015               | 88                    | 0,015                  |
| KEGG_Amyotrophic_lateral_sclerosis_ALS_Main_Pathway                                                                                                                        | 0,025                      | -0,062                | -0,013               | 27                    | 0,006                  |
| KEGG_Antigen_processing_and_presentation_Main_Pathway                                                                                                                      | -0,007                     | -0,091                | 0,051                | 29                    | 0,022                  |
| KEGG_Apoptosis_Main_Pathway                                                                                                                                                | -0,119                     | 0,141                 | -0,024               | 43                    | -0,072                 |
| KEGG_Arachidonic_acid_metabolism_Main_Pathway                                                                                                                              | -0,026                     | -0,024                | 0,029                | 62                    | 0,002                  |
| KEGG_Arginine_and_proline_metabolism_Main_Pathway                                                                                                                          | -0,038                     | -0,000                | -0,026               | 56                    | -0,032                 |
| KEGG_Arrhythmogenic_right_ventricular_cardiomyopathy_ARVC_Main_Pathway                                                                                                     | -0,075                     | 0,141                 | 0,023                | 6                     | -0,026                 |
| KEGG_Ascorbate_and_aldarate_metabolism_Main_Pathway                                                                                                                        | -0,002                     | 0,029                 | -0,006               | 21                    | -0,004                 |
| KEGG_Asthma_Main_Pathway                                                                                                                                                   | -0,011                     | 0,128                 | -0,143               | 32                    | -0,077                 |
| KEGG_Autoimmune_thyroid_disease_Main_Pathway                                                                                                                               | 0                          | 0                     | 0                    | 3                     | 0                      |
| KEGG_Axon_guidance_Main_Pathway                                                                                                                                            | 0,015                      | -0,040                | 0,012                | 95                    | 0,013                  |
| KEGG_B_cell_receptor_signaling_Main_Pathway                                                                                                                                | -0,006                     | 0,106                 | 0,005                | 58                    | -0,000                 |
| KEGG_Bacterial_invasion_of_epithelial_cells_Main_Pathway                                                                                                                   | 0,017                      | -0,098                | 0,019                | 53                    | 0,018                  |
| KEGG_Basal_cell_carcinoma_Main_Pathway                                                                                                                                     | 0                          | 0                     | 0                    | 27                    | 0                      |
| KEGG_Basal_transcription_factors_Main_Pathway                                                                                                                              | -0,038                     | 0,000                 | -0,038               | 45                    | -0,038                 |
| KEGG_Base_excision_repair_Main_Pathway                                                                                                                                     | -0,022                     | 0,063                 | 0,008                | 33                    | -0,007                 |
| KEGG_beta_Alanine_metabolism_Main_Pathway                                                                                                                                  | -0,280                     | 0,209                 | 0,015                | 26                    | -0,132                 |
| KEGG_Bile_secretion_Main_Pathway                                                                                                                                           | 0                          | 0                     | 0                    | 8                     | 0                      |
| KEGG_Biosynthesis_of_unsaturated_fatty_acids_Main_Pathway                                                                                                                  | -0,039                     | -0,069                | -0,013               | 23                    | -0,026                 |
| KEGG_Biotin_metabolism_Main_Pathway                                                                                                                                        | -0,101                     | 0,272                 | -0,031               | 2                     | -0,066                 |
| KEGG_Bladder_cancer_Main_Pathway                                                                                                                                           | -0,015                     | 0,138                 | -0,012               | 16                    | -0,013                 |
| KEGG_Butanoate_metabolism_Main_Pathway                                                                                                                                     | -0,013                     | 0,038                 | -0,013               | 22                    | -0,013                 |
| KEGG_Butirosin_and_neomycin_biosynthesis_Main_Pathway                                                                                                                      | -0,058                     | 0,004                 | 0,054                | 5                     | -0,002                 |
| KEGG_Caffeine_metabolism_Main_Pathway                                                                                                                                      | 0                          | 0                     | 0                    | 5                     | 0                      |
| KEGG_Calcium_signaling_Main_Pathway                                                                                                                                        | -0,001                     | -0,041                | 0,018                | 65                    | 0,009                  |
| KEGG_cAMP_signaling_Main_Pathway                                                                                                                                           | 0,003                      | -0,012                | 0,002                | 196                   | 0,002                  |
| KEGG_Carbohydrate_digestion_and_absorption_Main_Pathway                                                                                                                    | 0                          | 0                     | 0                    | 6                     | 0                      |
| KEGG_Cardiac_muscle_contraction_Main_Pathway                                                                                                                               | 0,140                      | -0,272                | 0,111                | 8                     | 0,125                  |



| Pathway                                                                      | Tumour_MDA_MB.231_Invasive | Tumour_AU565_Invasive | Tumour_T47D_Invasive | Number of genes in PW | Mean (MDA_MB.231_T47D) |
|------------------------------------------------------------------------------|----------------------------|-----------------------|----------------------|-----------------------|------------------------|
| KEGG_Cell_adhesion_molecules_CAMs_Main_Pathway                               | -0,009                     | -0,072                | 0,017                | 28                    | 0,004                  |
| KEGG_Cell_cycle_Main_Pathway                                                 | 0,003                      | -0,014                | 0,008                | 118                   | 0,006                  |
| KEGG_Central_carbon_metabolism_in_cancer_Main_Pathway                        | -0,033                     | -0,029                | 0,023                | 67                    | -0,005                 |
| KEGG_cGMP_PKG_signaling_Main_Pathway                                         | 0,003                      | -0,026                | -0,001               | 143                   | 0,001                  |
| KEGG_Chagas_disease_American_trypanosomiasis_Main_Pathway                    | 0,021                      | -0,023                | 0,020                | 52                    | 0,020                  |
| KEGG_Chemical_carcinogenesis_Main_Pathway                                    | 0,001                      | -0,017                | 0,014                | 35                    | 0,007                  |
| KEGG_Chemokine_signaling_Main_Pathway                                        | -0,001                     | -0,010                | 0,015                | 189                   | 0,007                  |
| KEGG_Choline_metabolism_in_cancer_Main_Pathway                               | -0,015                     | 0,010                 | 0,013                | 55                    | -0,001                 |
| KEGG_Cholinergic_synapse_Main_Pathway                                        | -0,016                     | 0,027                 | 0,004                | 81                    | -0,006                 |
| KEGG_Chronic_myeloid_leukemia_Main_Pathway                                   | 0,002                      | 0,039                 | -0,001               | 53                    | 0,001                  |
| KEGG_Circadian_entrainment_Main_Pathway                                      | -0,008                     | 0,013                 | -0,006               | 97                    | -0,007                 |
| KEGG_Circadian_rhythm_Main_Pathway                                           | 0,003                      | 0,047                 | 0,004                | 17                    | 0,004                  |
| KEGG_Citrate_cycle_TCA_cycle_Main_Pathway                                    | -0,092                     | 0,052                 | -0,027               | 30                    | -0,059                 |
| KEGG_Cocaine_addiction_Main_Pathway                                          | -0,008                     | 0,033                 | -0,017               | 40                    | -0,013                 |
| KEGG_Collecting_duct_acid_secretion_Main_Pathway                             | -0,034                     | 0,035                 | -0,007               | 27                    | -0,020                 |
| KEGG_Colorectal_cancer_Main_Pathway                                          | 0,013                      | 0,042                 | 0,001                | 36                    | 0,007                  |
| KEGG_Complement_and_coagulation_cascades_Main_Pathway                        | 0,032                      | -0,033                | 0,044                | 35                    | 0,038                  |
| KEGG_Cyanoamino_acid_metabolism_Main_Pathway                                 | -0,017                     | 0,034                 | 0,009                | 7                     | -0,004                 |
| KEGG_Cysteine_and_methionine_metabolism_Main_Pathway                         | -0,019                     | 0,095                 | 0,005                | 24                    | -0,007                 |
| KEGG_Cytokine_cytokine_receptor_interaction_Main_Pathway                     | 0                          | 0                     | 0                    | 25                    | 0                      |
| KEGG_Cytosolic_DNA_sensing_Main_Pathway                                      | 0,046                      | -0,116                | 0,059                | 18                    | 0,052                  |
| KEGG_D_Arginine_and_D_ornithine_metabolism_Main_Pathway                      | 0                          | 0                     | 0                    | 1                     | 0                      |
| KEGG_D_Glutamine_and_D_glutamate_metabolism_Main_Pathway                     | -0,144                     | -0,220                | 0,055                | 4                     | -0,045                 |
| KEGG_Dilated_cardiomyopathy_Main_Pathway                                     | 0,066                      | -0,115                | 0,052                | 13                    | 0,059                  |
| KEGG_DNA_replication_Main_Pathway                                            | -0,082                     | 0,144                 | -0,014               | 36                    | -0,048                 |
| KEGG_Dopaminergic_synapse_Main_Pathway                                       | 0,002                      | -0,026                | 0,011                | 125                   | 0,007                  |
| KEGG_Dorso_ventral_axis_formation_Main_Pathway                               | 0,027                      | 0,029                 | -0,017               | 7                     | 0,005                  |
| KEGG_Drug_metabolism_cytochrome_P450_Main_Pathway                            | 0                          | 0                     | 0                    | 36                    | 0                      |
| KEGG_Drug_metabolism_other_enzymes_Main_Pathway                              | -0,019                     | 0,030                 | -0,007               | 37                    | -0,013                 |
| KEGG_ECM_receptor_interaction_Main_Pathway                                   | -0,006                     | -0,101                | 0,028                | 88                    | 0,011                  |
| KEGG_Endocrine_and_other_factor_regulated_calcium_reabsorption_Main_Pathway  | -0,016                     | -0,047                | 0,013                | 34                    | -0,001                 |
| KEGG_Endocytosis_Main_Pathway                                                | -0,011                     | -0,072                | 0,029                | 19                    | 0,009                  |
| KEGG_Endometrial_cancer_Main_Pathway                                         | -0,016                     | 0,034                 | 0,002                | 32                    | -0,007                 |
| KEGG_Epithelial_cell_signaling_in_Helicobacter_pylori_infection_Main_Pathway | -0,013                     | -0,020                | 0,049                | 12                    | 0,018                  |
| KEGG_Epstein_Barr_virus_infection_Main_Pathway                               | 0,007                      | 0,056                 | 0,040                | 55                    | 0,024                  |
| KEGG_ErbB_signaling_Main_Pathway                                             | -0,042                     | -0,050                | 0,027                | 87                    | -0,008                 |
| KEGG_Estrogen_signaling_Main_Pathway                                         | -0,007                     | -0,004                | 0,005                | 89                    | -0,001                 |
| KEGG_Ether_lipid_metabolism_Main_Pathway                                     | -0,113                     | -0,008                | 0,009                | 44                    | -0,052                 |
| KEGG_Fanconi_anemia_Main_Pathway                                             | 0,019                      | -0,073                | -0,005               | 38                    | 0,007                  |
| KEGG_Fat_digestion_and_absorption_Main_Pathway                               | -0,043                     | 0,036                 | -0,032               | 9                     | -0,037                 |
| KEGG_Fatty_acid_biosynthesis_Main_Pathway                                    | -0,044                     | 0,112                 | 0,011                | 6                     | -0,016                 |
| KEGG_Fatty_acid_degradation_Main_Pathway                                     | -0,102                     | 0,050                 | -0,017               | 28                    | -0,059                 |
| KEGG_Fatty_acid_elongation_Main_Pathway                                      | -0,154                     | -0,084                | -0,059               | 5                     | -0,107                 |
| KEGG_Fc_epsilon_RL_signaling_Main_Pathway                                    | 0,000                      | 0,092                 | 0,007                | 62                    | 0,004                  |
| KEGG_Fc_gamma_R_mediated_phagocytosis_Main_Pathway                           | -0,043                     | 0,028                 | 0,007                | 85                    | -0,018                 |
| KEGG_Focal_adhesion_Main_Pathway                                             | 0,021                      | -0,069                | 0,024                | 213                   | 0,023                  |
| KEGG_Folate_biosynthesis_Main_Pathway                                        | -0,003                     | 0,069                 | -0,002               | 10                    | -0,002                 |
| KEGG_FoxO_signaling_Main_Pathway                                             | 0,000                      | -0,002                | -0,007               | 118                   | -0,004                 |
| KEGG_Fructose_and_mannose_metabolism_Main_Pathway                            | 0,002                      | 0,060                 | 0,003                | 31                    | 0,002                  |
| KEGG_GABAergic_synapse_Main_Pathway                                          | -0,014                     | -0,035                | 0,017                | 44                    | 0,002                  |
| KEGG_Galactose_metabolism_Main_Pathway                                       | 0,021                      | 0,023                 | 0,030                | 27                    | 0,025                  |
| KEGG_Gap_junction_Main_Pathway                                               | 0,015                      | 0,012                 | -0,010               | 53                    | 0,003                  |
| KEGG_Gastric_acid_secretion_Main_Pathway                                     | -0,004                     | 0,024                 | -0,017               | 32                    | -0,010                 |
| KEGG_Glioma_Main_Pathway                                                     | -0,012                     | 0,021                 | 0,006                | 54                    | -0,003                 |
| KEGG_Glucagon_signaling_Main_Pathway                                         | -0,012                     | -0,010                | -0,011               | 76                    | -0,012                 |
| KEGG_Glutamatergic_synapse_Main_Pathway                                      | 0,005                      | 0,010                 | -0,002               | 91                    | 0,001                  |
| KEGG_Glutathione_metabolism_Main_Pathway                                     | -0,045                     | 0,088                 | 0,008                | 41                    | -0,018                 |
| KEGG_Glycerolipid_metabolism_Main_Pathway                                    | -0,027                     | 0,003                 | 0,018                | 58                    | -0,005                 |

| Pathway                                                                               | Tumour_MDA_MB.231_Invasive | Tumour_AU565_Invasive | Tumour_T47D_Invasive | Number of genes in PW | Mean (MDA_MB.231_T47D) |
|---------------------------------------------------------------------------------------|----------------------------|-----------------------|----------------------|-----------------------|------------------------|
| KEGG_Glycerophospholipid_metabolism_Main_Pathway                                      | -0,036                     | -0,020                | 0,016                | 92                    | -0,010                 |
| KEGG_Glycine_serine_and_threonine_metabolism_Main_Pathway                             | -0,002                     | 0,001                 | -0,011               | 35                    | -0,007                 |
| KEGG_Glycolysis_Gluconeogenesis_Main_Pathway                                          | 0,002                      | -0,014                | 0,011                | 67                    | 0,006                  |
| KEGG_Glycosaminoglycan_biosynthesis_chondroitin_sulfate_dermatan_sulfate_Main_Pathway | 0,007                      | 0,018                 | -0,031               | 11                    | -0,012                 |
| KEGG_Glycosaminoglycan_biosynthesis_heparan_sulfate_heparin_Main_Pathway              | -0,006                     | 0,028                 | -0,018               | 28                    | -0,012                 |
| KEGG_Glycosaminoglycan_biosynthesis_keratan_sulfate_Main_Pathway                      | -0,006                     | 0,003                 | 0,008                | 15                    | 0,001                  |
| KEGG_Glycosaminoglycan_degradation_Main_Pathway                                       | -0,042                     | 0,143                 | -0,056               | 19                    | -0,049                 |
| KEGG_Glycosphingolipid_biosynthesis_ganglio_series_Main_Pathway                       | -0,027                     | 0,028                 | -0,007               | 15                    | -0,017                 |
| KEGG_Glycosphingolipid_biosynthesis_globo_series_Main_Pathway                         | -0,060                     | 0,097                 | -0,051               | 13                    | -0,055                 |
| KEGG_Glycosphingolipid_biosynthesis_lacto_and_neolacto_series_Main_Pathway            | 0,005                      | -0,009                | 0,002                | 26                    | 0,003                  |
| KEGG_Glycosylphosphatidylinositol_GPI_anchor_biosynthesis_Main_Pathway                | -0,021                     | 0,003                 | -0,006               | 23                    | -0,014                 |
| KEGG_Glyoxylate_and_dicarboxylate_metabolism_Main_Pathway                             | -0,028                     | -0,026                | -0,010               | 16                    | -0,019                 |
| KEGG_GnRH_signaling_Main_Pathway                                                      | -0,016                     | -0,018                | 0,008                | 72                    | -0,004                 |
| KEGG_Graft_versus_host_disease_Main_Pathway                                           | 0                          | 0                     | 0                    | 3                     | 0                      |
| KEGG_Hedgehog_signaling_Main_Pathway                                                  | 0,009                      | 0,014                 | 0,017                | 42                    | 0,013                  |
| KEGG_Hematopoietic_cell_lineage_Main_Pathway                                          | -0,000                     | -0,032                | 0,016                | 89                    | 0,008                  |
| KEGG_Hepatitis_B_Main_Pathway                                                         | 0,007                      | -0,055                | 0,026                | 61                    | 0,017                  |
| KEGG_Hepatitis_C_Main_Pathway                                                         | 0,015                      | -0,039                | 0,032                | 47                    | 0,023                  |
| KEGG_Herpes_simplex_infection_Main_Pathway                                            | -0,019                     | 0,031                 | -0,025               | 44                    | -0,022                 |
| KEGG_HIF_1_signaling_Main_Pathway                                                     | -0,101                     | -0,014                | 0,025                | 85                    | -0,038                 |
| KEGG_Hippo_signaling_Main_Pathway                                                     | -0,006                     | 0,006                 | -0,015               | 110                   | -0,010                 |
| KEGG_Histidine_metabolism_Main_Pathway                                                | -0,034                     | -0,046                | 0,023                | 22                    | -0,006                 |
| KEGG_Homologous_recombination_Main_Pathway                                            | -0,020                     | 0,031                 | -0,038               | 28                    | -0,029                 |
| KEGG_HTLV_1_infection_Main_Pathway                                                    | 0,008                      | -0,011                | -0,003               | 97                    | 0,003                  |
| KEGG_Huntington_s_disease_Main_Pathway                                                | 0,015                      | -0,095                | 0,033                | 21                    | 0,024                  |
| KEGG_Hypertrophic_cardiomyopathy_HCM_Main_Pathway                                     | 0,066                      | -0,115                | 0,052                | 13                    | 0,059                  |
| KEGG_Inflammatory_bowel_disease_IBD_Main_Pathway                                      | 0,012                      | -0,031                | 0,019                | 14                    | 0,016                  |
| KEGG_Inflammatory_mediator_regulation_of_TRP_channels_Main_Pathway                    | -0,004                     | -0,016                | 0,003                | 89                    | -0,001                 |
| KEGG_Influenza_A_Main_Pathway                                                         | -0,034                     | 0,069                 | -0,027               | 66                    | -0,031                 |
| KEGG_Inositol_phosphate_metabolism_Main_Pathway                                       | -0,067                     | 0,078                 | -0,004               | 61                    | -0,036                 |
| KEGG_Insulin_secretion_Main_Pathway                                                   | -0,007                     | -0,013                | 0,003                | 55                    | -0,002                 |
| KEGG_Insulin_signaling_Main_Pathway                                                   | -0,062                     | 0,030                 | 0,006                | 72                    | -0,028                 |
| KEGG_Intestinal_immune_network_for_IgA_production_Main_Pathway                        | 0                          | 0                     | 0                    | 5                     | 0                      |
| KEGG_Jak_STAT_signaling_Main_Pathway                                                  | 0,006                      | -0,034                | 0,009                | 156                   | 0,008                  |
| KEGG_Legionellosis_Main_Pathway                                                       | -0,016                     | 0,050                 | -0,007               | 14                    | -0,012                 |
| KEGG_Leishmaniasis_Main_Pathway                                                       | 0,022                      | -0,028                | 0,022                | 49                    | 0,022                  |
| KEGG_Leukocyte_transendothelial_migration_Main_Pathway                                | 0,005                      | -0,021                | 0,008                | 78                    | 0,006                  |
| KEGG_Linoleic_acid_metabolism_Main_Pathway                                            | 0,005                      | -0,029                | 0,006                | 29                    | 0,006                  |
| KEGG_Lipoic_acid_metabolism_Main_Pathway                                              | 0,043                      | 0,123                 | -0,017               | 3                     | 0,013                  |
| KEGG_Long_term_depression_Main_Pathway                                                | -0,012                     | 0,076                 | 0,007                | 59                    | -0,003                 |
| KEGG_Long_term_potentiation_Main_Pathway                                              | -0,014                     | 0,035                 | 0,001                | 67                    | -0,006                 |
| KEGG_Lysine_biosynthesis_Main_Pathway                                                 | -0,027                     | 0,077                 | -0,045               | 2                     | -0,036                 |
| KEGG_Lysine_degradation_Main_Pathway                                                  | -0,062                     | -0,048                | -0,016               | 16                    | -0,039                 |
| KEGG_Lysosome_Main_Pathway                                                            | -0,052                     | 0,080                 | -0,031               | 122                   | -0,042                 |
| KEGG_Malaria_Main_Pathway                                                             | -0,020                     | 0,062                 | -0,009               | 4                     | -0,015                 |
| KEGG_MAPK_signaling_Main_Pathway                                                      | 0,003                      | -0,030                | 0,013                | 244                   | 0,008                  |
| KEGG_Maturity_onset_diabetes_of_the_young_Main_Pathway                                | 0                          | 0                     | 0                    | 4                     | 0                      |
| KEGG_Measles_Main_Pathway                                                             | 0,019                      | -0,029                | -0,003               | 23                    | 0,008                  |
| KEGG_Melanogenesis_Main_Pathway                                                       | -0,008                     | 0,153                 | -0,025               | 14                    | -0,016                 |
| KEGG_Melanoma_Main_Pathway                                                            | -0,004                     | -0,005                | -0,000               | 58                    | -0,002                 |
| KEGG_Metabolism_of_xenobiotics_by_cytochrome_P450_Main_Pathway                        | -0,014                     | 0,021                 | 0,005                | 72                    | -0,005                 |
| KEGG_MicroRNAs_in_cancer_Main_Pathway                                                 | 0,012                      | -0,005                | 0,002                | 153                   | 0,007                  |
| KEGG_Mineral_absorption_Main_Pathway                                                  | -0,089                     | 0,100                 | 0,077                | 5                     | -0,006                 |
| KEGG_Mismatch_repair_Main_Pathway                                                     | -0,086                     | 0,187                 | -0,026               | 23                    | -0,056                 |
| KEGG_Morphine_addiction_Main_Pathway                                                  | -0,001                     | -0,020                | -0,001               | 52                    | -0,001                 |
| KEGG_mRNA_surveillance_Main_Pathway                                                   | 0,001                      | 0,031                 | -0,002               | 40                    | -0,000                 |

| Pathway                                                              | Tumour_MDA.<br>MB.231.<br>Invasive | Tumour_AU565.<br>Invasive | Tumour_T47D.<br>Invasive | Number<br>of genes<br>in PW | Mean<br>(MDA.<br>MB.231,<br>T47D) |
|----------------------------------------------------------------------|------------------------------------|---------------------------|--------------------------|-----------------------------|-----------------------------------|
| KEGG_mTOR_signaling_Main_Pathway                                     | 0,108                              | -0,008                    | -0,023                   | 49                          | 0,043                             |
| KEGG_Mucin_type_O_Glycan_biosynthesis_Main_Pathway                   | -0,003                             | 0,053                     | -0,007                   | 31                          | -0,005                            |
| KEGG_N_Glycan_biosynthesis_Main_Pathway                              | -0,153                             | 0,057                     | 0,007                    | 48                          | -0,073                            |
| KEGG_Natural_killer_cell_mediated_cytotoxicity_Main_Pathway          | -0,010                             | 0,063                     | -0,011                   | 105                         | -0,011                            |
| KEGG_Neuroactive_ligand_receptor_interaction_Main_Pathway            | 0,001                              | -0,008                    | 0,001                    | 275                         | 0,001                             |
| KEGG_Neurotrophin_signaling_Main_Pathway                             | -0,006                             | 0,015                     | 0,002                    | 116                         | -0,002                            |
| KEGG_NF_kappa_B_signaling_Main_Pathway                               | -0,008                             | -0,005                    | 0,026                    | 72                          | 0,009                             |
| KEGG_Nicotinate_and_nicotinamide_metabolism_Main_Pathway             | -0,017                             | 0,027                     | 0,035                    | 28                          | 0,009                             |
| KEGG_Nicotine_addiction_Main_Pathway                                 | 0                                  | 0                         | 0                        | 40                          | 0                                 |
| KEGG_Nitrogen_metabolism_Main_Pathway                                | -0,013                             | -0,116                    | -0,063                   | 4                           | -0,038                            |
| KEGG_NOD_like_receptor_signaling_Main_Pathway                        | 0,025                              | -0,034                    | 0,026                    | 42                          | 0,026                             |
| KEGG_Non_alcoholic_fatty_liver_disease_NAFLD_Main_Pathway            | 0,013                              | 0,002                     | -0,021                   | 28                          | -0,004                            |
| KEGG_Non_homologous_end_joining_Main_Pathway                         | -0,000                             | 0,006                     | -0,016                   | 13                          | -0,008                            |
| KEGG_Non_small_cell_lung_cancer_Main_Pathway                         | -0,023                             | 0,042                     | 0,004                    | 43                          | -0,010                            |
| KEGG_Notch_signaling_Main_Pathway                                    | 0,011                              | -0,027                    | 0,034                    | 48                          | 0,023                             |
| KEGG_Nucleotide_excision_repair_Main_Pathway                         | -0,030                             | 0,047                     | 0,009                    | 47                          | -0,010                            |
| KEGG_Olfactory_transduction_Main_Pathway                             | -0,000                             | 0,000                     | -0,000                   | 408                         | -0,000                            |
| KEGG_One_carbon_pool_by_folate_Main_Pathway                          | 0,024                              | -0,028                    | 0,025                    | 20                          | 0,024                             |
| KEGG_Oocyte_meiosis_Main_Pathway                                     | 0,018                              | -0,010                    | -0,005                   | 90                          | 0,006                             |
| KEGG_Osteoclast_differentiation_Main_Pathway                         | -0,010                             | 0,019                     | 0,015                    | 109                         | 0,002                             |
| KEGG_Other_glycan_degradation_Main_Pathway                           | -0,056                             | 0,138                     | -0,060                   | 18                          | -0,058                            |
| KEGG_Other_types_of_O_glycan_biosynthesis_Main_Pathway               | -0,048                             | -0,011                    | 0,009                    | 31                          | -0,020                            |
| KEGG_Ovarian_steroidogenesis_Main_Pathway                            | -0,005                             | -0,026                    | -0,003                   | 36                          | -0,004                            |
| KEGG_Oxidative_phosphorylation_Main_Pathway                          | -0,113                             | 0,062                     | -0,014                   | 133                         | -0,064                            |
| KEGG_Oxytocin_signaling_Main_Pathway                                 | -0,003                             | -0,017                    | 0,010                    | 151                         | 0,004                             |
| KEGG_p53_signaling_Main_Pathway                                      | -0,008                             | -0,005                    | 0,019                    | 48                          | 0,005                             |
| KEGG_Pancreatic_cancer_Main_Pathway                                  | -0,001                             | 0,035                     | -0,009                   | 40                          | -0,005                            |
| KEGG_Pancreatic_secretion_Main_Pathway                               | 0,002                              | -0,059                    | 0,021                    | 17                          | 0,012                             |
| KEGG_Pantothenate_and_CoA_biosynthesis_Main_Pathway                  | 0,011                              | 0,109                     | -0,023                   | 12                          | -0,006                            |
| KEGG_Parkinson_s_disease_Main_Pathway                                | -0,027                             | 0,031                     | -0,034                   | 12                          | -0,030                            |
| KEGG_Pathogenic_Escherichia_coli_infection_Main_Pathway              | 0,027                              | -0,033                    | 0,005                    | 22                          | 0,016                             |
| KEGG_Pathways_in_cancer_Main_Pathway                                 | 0,011                              | -0,074                    | 0,027                    | 234                         | 0,019                             |
| KEGG_Pentose_and_glucuronate_interconversions_Main_Pathway           | -0,002                             | 0,079                     | -0,001                   | 30                          | -0,002                            |
| KEGG_Pentose_phosphate_Main_Pathway                                  | 0,031                              | 0,002                     | 0,035                    | 29                          | 0,033                             |
| KEGG_Peroxisome_Main_Pathway                                         | -0,115                             | 0,022                     | 0,008                    | 82                          | -0,054                            |
| KEGG_Pertussis_Main_Pathway                                          | -0,006                             | 0,041                     | 0,006                    | 25                          | -0,000                            |
| KEGG_Phagosome_Main_Pathway                                          | 0,008                              | -0,048                    | 0,006                    | 27                          | 0,007                             |
| KEGG_Phenylalanine_metabolism_Main_Pathway                           | -0,023                             | -0,006                    | -0,000                   | 17                          | -0,011                            |
| KEGG_Phenylalanine_tyrosine_and_tryptophan_biosynthesis_Main_Pathway | -0,067                             | 0,127                     | -0,079                   | 5                           | -0,073                            |
| KEGG_Phosphatidylinositol_signaling_system_Main_Pathway              | 0,004                              | -0,005                    | 0,010                    | 77                          | 0,007                             |
| KEGG_Phototransduction_Main_Pathway                                  | 0,003                              | 0,099                     | -0,027                   | 18                          | -0,012                            |
| KEGG_PI3K_Akt_signaling_Main_Pathway                                 | -0,017                             | -0,003                    | 0,009                    | 225                         | -0,004                            |
| KEGG_Platelet_activation_Main_Pathway                                | 0,005                              | 0,033                     | 0,006                    | 124                         | 0,006                             |
| KEGG_Porphyrin_and_chlorophyll_metabolism_Main_Pathway               | -0,021                             | -0,025                    | 0,008                    | 15                          | -0,007                            |
| KEGG_PPAR_signaling_Main_Pathway                                     | -0,030                             | 0,012                     | -0,028                   | 59                          | -0,029                            |
| KEGG_Primary_bile_acid_biosynthesis_Main_Pathway                     | -0,051                             | -0,015                    | -0,021                   | 17                          | -0,036                            |
| KEGG_Primary_immunodeficiency_Main_Pathway                           | -0,005                             | -0,025                    | 0,025                    | 36                          | 0,010                             |
| KEGG_Prion_diseases_Main_Pathway                                     | -0,028                             | 0,050                     | -0,016                   | 20                          | -0,022                            |
| KEGG_Progesterone_mediated_oocyte_maturation_Main_Pathway            | 0,021                              | 0,034                     | -0,039                   | 23                          | -0,009                            |
| KEGG_Prolactin_signaling_Main_Pathway                                | 0,013                              | 0,010                     | 0,009                    | 64                          | 0,011                             |
| KEGG_Propanoate_metabolism_Main_Pathway                              | -0,140                             | 0,116                     | -0,010                   | 23                          | -0,075                            |
| KEGG_Prostate_cancer_Main_Pathway                                    | -0,012                             | 0,025                     | 0,009                    | 78                          | -0,001                            |
| KEGG_Proteasome_Main_Pathway                                         | -0,022                             | 0,048                     | -0,014                   | 44                          | -0,018                            |
| KEGG_Protein_digestion_and_absorption_Main_Pathway                   | -0,005                             | -0,041                    | 0,011                    | 89                          | 0,003                             |
| KEGG_Protein_export_Main_Pathway                                     | -0,070                             | -0,019                    | -0,009                   | 23                          | -0,039                            |
| KEGG_Protein_processing_in_endoplasmic_reticulum_Main_Pathway        | 0,052                              | -0,026                    | 0,007                    | 26                          | 0,029                             |
| KEGG_Proteoglycans_in_cancer_Main_Pathway                            | -0,029                             | -0,038                    | 0,020                    | 166                         | -0,005                            |
| KEGG_Proximal_tubule_bicarbonate_reclamation_Main_Pathway            | -0,144                             | -0,220                    | 0,055                    | 4                           | -0,045                            |

| Pathway                                                                    | Tumour_MDA_MB.231_Invasive | Tumour_AU565_Invasive | Tumour_T47D_Invasive | Number of genes in PW | Mean (MDA_MB.231_T47D) |
|----------------------------------------------------------------------------|----------------------------|-----------------------|----------------------|-----------------------|------------------------|
| KEGG_Purine_metabolism_Main_Pathway                                        | -0,006                     | 0,032                 | 0,003                | 168                   | -0,002                 |
| KEGG_Pyrimidine_metabolism_Main_Pathway                                    | -0,025                     | 0,064                 | 0,001                | 102                   | -0,012                 |
| KEGG_Pyruvate_metabolism_Main_Pathway                                      | -0,016                     | 0,004                 | -0,017               | 40                    | -0,017                 |
| KEGG_Rap1_signaling_Main_Pathway                                           | 0,001                      | -0,028                | 0,005                | 199                   | 0,003                  |
| KEGG_Ras_signaling_Main_Pathway                                            | -0,008                     | -0,019                | 0,006                | 223                   | -0,001                 |
| KEGG_Regulation_of_actin_cytoskeleton_Main_Pathway                         | 0,012                      | 0,006                 | -0,011               | 165                   | 0,000                  |
| KEGG_Regulation_of_autophagy_Main_Pathway                                  | 0,015                      | 0,057                 | -0,004               | 10                    | 0,005                  |
| KEGG_Regulation_of_lipolysis_in_adipocytes_Main_Pathway                    | -0,002                     | 0,021                 | -0,014               | 32                    | -0,008                 |
| KEGG_Renal_cell_carcinoma_Main_Pathway                                     | -0,004                     | -0,054                | 0,008                | 25                    | 0,002                  |
| KEGG_Renin_angiotensin_system_Main_Pathway                                 | -0,025                     | 0,002                 | -0,005               | 17                    | -0,015                 |
| KEGG_Retinol_metabolism_Main_Pathway                                       | -0,009                     | 0,001                 | -0,003               | 65                    | -0,006                 |
| KEGG_Retrograde_endocannabinoid_signaling_Main_Pathway                     | -0,007                     | -0,022                | 0,015                | 51                    | 0,004                  |
| KEGG_Rheumatoid_arthritis_Main_Pathway                                     | 0                          | 0                     | 0                    | 4                     | 0                      |
| KEGG_Riboflavin_metabolism_Main_Pathway                                    | 0,087                      | -0,124                | 0,075                | 3                     | 0,081                  |
| KEGG_Ribosome_biogenesis_in_eukaryotes_Main_Pathway                        | -0,020                     | -0,002                | -0,033               | 87                    | -0,026                 |
| KEGG_Ribosome_Main_Pathway                                                 | -0,045                     | 0,087                 | 0,007                | 137                   | -0,019                 |
| KEGG_RIG_I_like_receptor_signaling_Main_Pathway                            | 0,029                      | -0,021                | 0,017                | 45                    | 0,023                  |
| KEGG_RNA_degradation_Main_Pathway                                          | -0,032                     | 0,122                 | -0,023               | 77                    | -0,028                 |
| KEGG_RNA_polymerase_Main_Pathway                                           | -0,018                     | 0,015                 | 0,007                | 32                    | -0,006                 |
| KEGG_RNA_transport_Main_Pathway                                            | -0,032                     | 0,020                 | -0,028               | 51                    | -0,030                 |
| KEGG_Salivary_secretion_Main_Pathway                                       | 0                          | 0                     | 0                    | 15                    | 0                      |
| KEGG_Salmonella_infection_Main_Pathway                                     | 0,030                      | -0,045                | 0,011                | 44                    | 0,021                  |
| KEGG_Selenocompound_metabolism_Main_Pathway                                | 0,000                      | 0,032                 | -0,035               | 14                    | -0,018                 |
| KEGG_Serotonergic_synapse_Main_Pathway                                     | -0,008                     | -0,050                | 0,017                | 63                    | 0,005                  |
| KEGG_Shigellosis_Main_Pathway                                              | 0,026                      | -0,077                | 0,013                | 25                    | 0,020                  |
| KEGG_Signaling_pathways_regulating_pluripotency_of_stem_cells_Main_Pathway | -0,196                     | 0,805                 | -0,020               | 5                     | -0,108                 |
| KEGG_Small_cell_lung_cancer_Main_Pathway                                   | 0,035                      | -0,181                | 0,068                | 57                    | 0,052                  |
| KEGG_SNARE_interactions_in_vesicular_transport_Main_Pathway                | -0,014                     | -0,166                | 0,009                | 8                     | -0,003                 |
| KEGG_Sphingolipid_metabolism_Main_Pathway                                  | -0,036                     | -0,026                | 0,005                | 47                    | -0,016                 |
| KEGG_Sphingolipid_signaling_Main_Pathway                                   | -0,017                     | 0,013                 | 0,009                | 98                    | -0,004                 |
| KEGG_Spliceosome_Main_Pathway                                              | -0,039                     | 0,116                 | -0,035               | 132                   | -0,037                 |
| KEGG_Staphylococcus_aureus_infection_Main_Pathway                          | 0,029                      | -0,033                | 0,066                | 20                    | 0,047                  |
| KEGG_Starch_and_sucrose_metabolism_Main_Pathway                            | 0,018                      | 0,012                 | -0,004               | 55                    | 0,007                  |
| KEGG_Steroid_biosynthesis_Main_Pathway                                     | -0,007                     | -0,236                | 0,062                | 17                    | 0,027                  |
| KEGG_Steroid_hormone_biosynthesis_Main_Pathway                             | -0,006                     | -0,004                | -0,009               | 51                    | -0,008                 |
| KEGG_Sulfur_metabolism_Main_Pathway                                        | -0,056                     | -0,135                | -0,083               | 9                     | -0,069                 |
| KEGG_Sulfur_relay_system_Main_Pathway                                      | -0,070                     | 0,060                 | -0,014               | 6                     | -0,042                 |
| KEGG_Synaptic_vesicle_cycle_Main_Pathway                                   | -0,004                     | -0,006                | 0,045                | 7                     | 0,020                  |
| KEGG_Synthesis_and_degradation_of_ketone_bodies_Main_Pathway               | 0,021                      | 0,060                 | -0,023               | 10                    | -0,001                 |
| KEGG_Systemic_lupus_erythematosus_Main_Pathway                             | 0,064                      | -0,072                | 0,147                | 9                     | 0,105                  |
| KEGG_T_cell_receptor_signaling_Main_Pathway                                | -0,010                     | 0,038                 | 0,013                | 92                    | 0,001                  |
| KEGG_Taste_transduction_Main_Pathway                                       | -0,031                     | 0,027                 | -0,025               | 14                    | -0,028                 |
| KEGG_Taurine_and_hypotaurine_metabolism_Main_Pathway                       | 0,009                      | 0,010                 | 0,020                | 11                    | 0,015                  |
| KEGG_Terpenoid_backbone_biosynthesis_Main_Pathway                          | 0,033                      | -0,023                | 0,003                | 21                    | 0,018                  |
| KEGG_TGF_beta_signaling_Main_Pathway                                       | -0,083                     | -0,006                | 0,010                | 65                    | -0,037                 |
| KEGG_Thiamine_metabolism_Main_Pathway                                      | 0,065                      | -0,063                | 0,025                | 3                     | 0,045                  |
| KEGG_Thyroid_cancer_Main_Pathway                                           | -0,011                     | 0,234                 | -0,042               | 15                    | -0,026                 |
| KEGG_Thyroid_hormone_signaling_Main_Pathway                                | 0,016                      | -0,005                | 0,018                | 69                    | 0,017                  |
| KEGG_Thyroid_hormone_synthesis_Main_Pathway                                | 0                          | 0                     | 0                    | 17                    | 0                      |
| KEGG_Tight_junction_Main_Pathway                                           | 0,010                      | -0,044                | 0,022                | 124                   | 0,016                  |
| KEGG_TNF_signaling_Main_Pathway                                            | 0,018                      | -0,025                | 0,036                | 54                    | 0,027                  |
| KEGG_Toll_like_receptor_signaling_Main_Pathway                             | 0,017                      | -0,027                | 0,022                | 97                    | 0,019                  |
| KEGG_Toxoplasmosis_Main_Pathway                                            | 0,002                      | 0,030                 | -0,016               | 34                    | -0,007                 |
| KEGG_Transcriptional_misregulation_in_cancer_Main_Pathway                  | -0,009                     | -0,014                | 0,008                | 179                   | -0,000                 |
| KEGG_Tryptophan_metabolism_Main_Pathway                                    | -0,027                     | 0,008                 | -0,005               | 31                    | -0,016                 |
| KEGG_Tuberculosis_Main_Pathway                                             | -0,012                     | 0,023                 | -0,003               | 48                    | -0,007                 |
| KEGG_Type_I_diabetes_mellitus_Main_Pathway                                 | -0,017                     | 0,076                 | -0,101               | 45                    | -0,059                 |
| KEGG_Type_II_diabetes_mellitus_Main_Pathway                                | 0                          | 0                     | 0                    | 10                    | 0                      |

| Pathway                                                                                                                                         | Tumour_MDA_MB.231_Invasive | Tumour_AU565_Invasive | Tumour_T47D_Invasive | Number of genes in PW | Mean (MDA_MB.231_T47D) |
|-------------------------------------------------------------------------------------------------------------------------------------------------|----------------------------|-----------------------|----------------------|-----------------------|------------------------|
| KEGG_Tyrosine_metabolism_Main_Pathway                                                                                                           | -0,006                     | -0,004                | -0,013               | 25                    | -0,010                 |
| KEGG_Ubiquinone_and_other_terpenoid_quinone_biosynthesis_Main_Pathway                                                                           | -0,061                     | 0,106                 | -0,016               | 4                     | -0,039                 |
| KEGG_Ubiquitin_mediated_proteolysis_Main_Pathway                                                                                                | 0,011                      | 0,010                 | 0,010                | 137                   | 0,010                  |
| KEGG_Valine_leucine_and_isoleucine_biosynthesis_Main_Pathway                                                                                    | 0,058                      | -0,176                | 0,061                | 4                     | 0,060                  |
| KEGG_Valine_leucine_and_isoleucine_degradation_Main_Pathway                                                                                     | -0,120                     | 0,081                 | -0,025               | 47                    | -0,072                 |
| KEGG_Vascular_smooth_muscle_contraction_Main_Pathway                                                                                            | 0,161                      | -0,144                | 0,053                | 6                     | 0,107                  |
| KEGG_Vasopressin_regulated_water_reabsorption_Main_Pathway                                                                                      | -0,025                     | 0,040                 | -0,017               | 21                    | -0,021                 |
| KEGG_VEGF_signaling_Main_Pathway                                                                                                                | 0,011                      | 0,024                 | 0,002                | 61                    | 0,006                  |
| KEGG_Vibrio_cholerae_infection_Main_Pathway                                                                                                     | -0,055                     | 0,085                 | -0,030               | 10                    | -0,043                 |
| KEGG_Viral_carcinogenesis_Main_Pathway                                                                                                          | 0,003                      | 0,009                 | 0,017                | 206                   | 0,010                  |
| KEGG_Viral_myocarditis_Main_Pathway                                                                                                             | 0,015                      | 0,048                 | -0,033               | 5                     | -0,009                 |
| KEGG_Vitamin_B6_metabolism_Main_Pathway                                                                                                         | -0,024                     | 0,111                 | -0,000               | 5                     | -0,012                 |
| KEGG_Vitamin_digestion_and_absorption_Main_Pathway                                                                                              | -0,014                     | 0,013                 | 0,007                | 24                    | -0,003                 |
| KEGG_Wnt_signaling_Main_Pathway                                                                                                                 | -0,005                     | 0,004                 | 0,015                | 112                   | 0,005                  |
| ketogenesis                                                                                                                                     | 0,014                      | 0,100                 | -0,057               | 5                     | -0,021                 |
| ketolysis                                                                                                                                       | -0,004                     | 0,192                 | -0,066               | 4                     | -0,035                 |
| lactate_fermentation_reoxidation_of_cytosolic_NADH                                                                                              | 0                          | 0                     | 0                    | 3                     | 0                      |
| lactose_degradation_III                                                                                                                         | -0,171                     | 0,267                 | -0,152               | 1                     | -0,161                 |
| lanosterol_biosynthesis                                                                                                                         | -0,063                     | 0,152                 | -0,057               | 1                     | -0,060                 |
| L-carnitine_biosynthesis                                                                                                                        | -0,031                     | -0,004                | -0,017               | 3                     | -0,024                 |
| L-cysteine_degradation_I                                                                                                                        | 0                          | 0                     | 0                    | 2                     | 0                      |
| L-cysteine_degradation_II                                                                                                                       | -0,006                     | 0,064                 | -0,122               | 2                     | -0,064                 |
| L-dopa_degradation                                                                                                                              | 0,093                      | -0,431                | -0,024               | 1                     | 0,034                  |
| L-dopachrome_biosynthesis                                                                                                                       | 0                          | 0                     | 0                    | 1                     | 0                      |
| leucine_degradation                                                                                                                             | -0,120                     | 0,026                 | -0,060               | 12                    | -0,090                 |
| leukotriene_biosynthesis                                                                                                                        | 0,007                      | 0,008                 | -0,005               | 7                     | 0,001                  |
| L-glutamine_tRNA_biosynthesis                                                                                                                   | -0,154                     | 0,213                 | -0,069               | 2                     | -0,111                 |
| lipoate_biosynthesis_and_incorporation                                                                                                          | 0,064                      | 0,184                 | -0,026               | 2                     | 0,019                  |
| lipoate_salvage                                                                                                                                 | 0                          | 0                     | 0                    | 1                     | 0                      |
| lipoxin_biosynthesis                                                                                                                            | 0                          | 0                     | 0                    | 3                     | 0                      |
| Lipoxins_Influence_on_Cell_Growth_and_Proliferation                                                                                             | -0,031                     | -0,049                | 0,014                | 41                    | -0,009                 |
| Lipoxins_Influence_on_Neutrophil_Chemotaxis                                                                                                     | 0,054                      | -0,124                | 0,049                | 8                     | 0,052                  |
| L-kynurenine_degradation                                                                                                                        | -0,014                     | -0,047                | -0,004               | 12                    | -0,009                 |
| L-serine_degradation                                                                                                                            | 0,232                      | -0,703                | 0,244                | 1                     | 0,238                  |
| lysine_degradation_I_saccharopine_pathway                                                                                                       | -0,051                     | -0,270                | 0,013                | 4                     | -0,019                 |
| lysine_degradation_II_pipecolate_pathway                                                                                                        | -0,021                     | -0,110                | -0,000               | 6                     | -0,010                 |
| malate-aspartate_shuttle                                                                                                                        | -0,094                     | 0,074                 | -0,105               | 4                     | -0,099                 |
| MAPK_Family_Pathway                                                                                                                             | -0,003                     | -0,025                | 0,012                | 294                   | 0,005                  |
| MAPK_Family_Pathway_Chromatin_Remodelling                                                                                                       | 0,006                      | 0,007                 | -0,001               | 22                    | 0,003                  |
| MAPK_Family_Pathway_Cytoskeleton                                                                                                                | 0,042                      | -0,055                | 0,055                | 8                     | 0,049                  |
| MAPK_Family_Pathway_Gene_Expression_via_ATF2_JUN_ELK1_NFKB2_CREB3                                                                               | 0,039                      | -0,160                | 0,069                | 31                    | 0,054                  |
| MAPK_Family_Pathway_Translation                                                                                                                 | 0,025                      | 0,024                 | -0,008               | 8                     | 0,009                  |
| MAPK_Signaling_Pathway                                                                                                                          | -0,001                     | -0,038                | 0,014                | 533                   | 0,007                  |
| MAPK_Signaling_Pathway_Cell_Motility_Inflammation_Apoptosis_Osmoregulation                                                                      | -0,032                     | 0,072                 | -0,001               | 18                    | -0,017                 |
| MAPK_Signaling_Pathway_Cell_Survival                                                                                                            | 0                          | 0                     | 0                    | 4                     | 0                      |
| MAPK_Signaling_Pathway_Gene_Expression_Apoptosis_Inflammation_Tumorigenesis_via_MYC_HSF1_STAT2                                                  | 0,045                      | -0,189                | 0,059                | 28                    | 0,052                  |
| MAPK_Signaling_Pathway_Gene_Expression_Cell_Proliferation_Cell_Survival_Tumorigenesis_Differentiation_Development_via_PXN_CREB3_RPS6KA5_RPS6KA6 | -0,012                     | -0,021                | 0,021                | 53                    | 0,004                  |
| melatonin_degradation_I                                                                                                                         | -0,095                     | 0,208                 | -0,037               | 11                    | -0,066                 |
| melatonin_degradation_II                                                                                                                        | 0                          | 0                     | 0                    | 1                     | 0                      |
| methionine_degradation                                                                                                                          | -0,037                     | 0,127                 | -0,004               | 4                     | -0,021                 |
| methionine_salvage                                                                                                                              | 0,018                      | 0,006                 | 0,012                | 3                     | 0,015                  |
| methylglyoxal_degradation_I                                                                                                                     | 0,086                      | -0,088                | -0,053               | 3                     | 0,016                  |
| methylglyoxal_degradation_III                                                                                                                   | 0,189                      | -0,081                | 0,165                | 3                     | 0,177                  |
| methylglyoxal_degradation_VI                                                                                                                    | 0                          | 0                     | 0                    | 1                     | 0                      |
| methylthiopropionate_biosynthesis                                                                                                               | -0,242                     | 0,437                 | 0,084                | 1                     | -0,079                 |
| mevalonate_pathway                                                                                                                              | 0,085                      | -0,068                | 0,017                | 10                    | 0,051                  |

| Pathway                                                                                                                        | Tumour_MDA_MB.231_Invasive | Tumour_AU565_Invasive | Tumour_T47D_Invasive | Number of genes in PW | Mean (MDA_MB.231_T47D) |
|--------------------------------------------------------------------------------------------------------------------------------|----------------------------|-----------------------|----------------------|-----------------------|------------------------|
| mineralocorticoid_biosynthesis                                                                                                 | 0                          | 0                     | 0                    | 3                     | 0                      |
| Mismatch_Repair_in_Eukaryotes_Pathway                                                                                          | -0,103                     | 0,226                 | -0,017               | 19                    | -0,060                 |
| Mitochondrial_Apoptosis_Pathway                                                                                                | 0,052                      | 0,022                 | -0,012               | 98                    | 0,020                  |
| Mitochondrial_Apoptosis_Pathway_Apoptosis                                                                                      | 0,017                      | 0,000                 | -0,017               | 19                    | -0,000                 |
| Mitochondrial_Apoptosis_Pathway_Depolarization                                                                                 | -0,077                     | 0,169                 | -0,034               | 7                     | -0,055                 |
| Mitochondrial_Apoptosis_Pathway_DNA_Fragmentation                                                                              | 0,020                      | -0,039                | -0,029               | 5                     | -0,005                 |
| Mitochondrial_Apoptosis_Pathway_Gene_Expression_via_TP53                                                                       | -0,090                     | 0,197                 | -0,039               | 6                     | -0,064                 |
| mitochondrial_L-carnitine_shuttle                                                                                              | -0,175                     | 0,242                 | -0,056               | 5                     | -0,116                 |
| Mitosis_Initiation                                                                                                             | -0,025                     | 0,092                 | -0,022               | 22                    | -0,023                 |
| molybdenum_cofactor_biosynthesis                                                                                               | -0,048                     | -0,079                | 0,062                | 4                     | 0,007                  |
| mRNA_capping                                                                                                                   | -0,023                     | 0,026                 | -0,026               | 4                     | -0,024                 |
| mTOR_Pathway                                                                                                                   | -0,015                     | -0,031                | 0,017                | 351                   | 0,001                  |
| mTOR_Pathway_Actin_Organization                                                                                                | -0,023                     | -0,066                | 0,005                | 50                    | -0,009                 |
| mTOR_Pathway_Autophagy                                                                                                         | 0,005                      | 0,050                 | -0,024               | 4                     | -0,009                 |
| mTOR_Pathway_Cap-dependent_Translation                                                                                         | -0,600                     | 0,151                 | 0,078                | 8                     | -0,261                 |
| mTOR_Pathway_Inflammation_Stress_Resistance                                                                                    | 0,078                      | -0,344                | 0,146                | 9                     | 0,112                  |
| mTOR_Pathway_Lipid_Synthesis                                                                                                   | -0,021                     | -0,072                | 0,011                | 48                    | -0,005                 |
| mTOR_Pathway_Metabolism_Stress_Response_and_Apoptosis                                                                          | 0,013                      | -0,038                | 0,021                | 6                     | 0,017                  |
| mTOR_Pathway_Microtubule_Organization                                                                                          | -0,021                     | -0,085                | 0,014                | 45                    | -0,004                 |
| mTOR_Pathway_Mitochondria_Proliferation_and_Function                                                                           | -0,047                     | 0,036                 | 0,015                | 4                     | -0,016                 |
| mTOR_Pathway_mRNA_Biogenesis                                                                                                   | -1,563                     | 0,006                 | 0,102                | 3                     | -0,730                 |
| mTOR_Pathway_Ribosome_Biogenesis                                                                                               | -1,554                     | 0,091                 | 0,126                | 3                     | -0,714                 |
| mTOR_Pathway_Translation_Elongation                                                                                            | -0,312                     | 0,116                 | -0,015               | 17                    | -0,163                 |
| mTOR_Pathway_VEGF_Pathway                                                                                                      | -0,002                     | 0,022                 | 0,004                | 3                     | 0,001                  |
| mucin_core_1_and_core_2_iDi-glycosylation                                                                                      | 0,013                      | 0,034                 | -0,002               | 28                    | 0,005                  |
| NAD_biosynthesis_from_2-amino-3-carboxymuconate_semialdehyde                                                                   | -0,086                     | -0,157                | 0,001                | 5                     | -0,043                 |
| NAD_ide_novoi_biosynthesis                                                                                                     | -0,036                     | -0,065                | 0,000                | 12                    | -0,018                 |
| NAD_phosphorylation_and_dephosphorylation                                                                                      | -0,041                     | 0,206                 | -0,030               | 2                     | -0,036                 |
| NAD_salvage                                                                                                                    | 0,004                      | -0,117                | -0,056               | 4                     | -0,026                 |
| NADH_repair                                                                                                                    | -0,023                     | 0,055                 | -0,008               | 3                     | -0,015                 |
| NCI_a4b7_Integrin_signaling_Main_Pathway                                                                                       | -0,090                     | 0,134                 | -0,045               | 6                     | -0,067                 |
| NCI_a6b1_and_a6b4_Integrin_signaling_Main_Pathway                                                                              | -0,128                     | -0,158                | 0,036                | 43                    | -0,046                 |
| NCI_a6b1_and_a6b4_Integrin_signaling_Pathway_(apoptosis)                                                                       | -0,125                     | -0,272                | 0,015                | 8                     | -0,055                 |
| NCI_a6b1_and_a6b4_Integrin_signaling_Pathway_(cell_migration)                                                                  | -0,125                     | -0,272                | 0,015                | 8                     | -0,055                 |
| NCI_a6b1_and_a6b4_Integrin_signaling_Pathway_(hemidesmosome_assembly)                                                          | -0,432                     | 0,024                 | -0,160               | 1                     | -0,296                 |
| NCI_a6b1_and_a6b4_Integrin_signaling_Pathway_(Pathway_degradation_of_ITGA6)                                                    | -0,125                     | -0,272                | 0,015                | 8                     | -0,055                 |
| NCI_a6b1_and_a6b4_Integrin_signaling_Pathway_(proteasomal_ubiquitin_dependent_protein_catabolic_process)                       | -0,166                     | -0,162                | 0,001                | 4                     | -0,082                 |
| NCI_a6b1_and_a6b4_Integrin_signaling_Pathway_(Tumor_Cell_Invasion)                                                             | -0,163                     | 0,045                 | -0,025               | 5                     | -0,094                 |
| NCI_ALK1_signaling_events_Main_Pathway                                                                                         | 0,036                      | -0,109                | 0,059                | 24                    | 0,047                  |
| NCI_ALK1_signaling_events_Pathway_(endothelial_cell_migration)                                                                 | 0,110                      | -0,079                | 0,062                | 7                     | 0,086                  |
| NCI_ALK1_signaling_events_Pathway_(endothelial_cell_proliferation)                                                             | 0,088                      | -0,064                | 0,050                | 10                    | 0,069                  |
| NCI_ALK1_signaling_events_Pathway_(sprouting_angiogenesis)                                                                     | 0,189                      | -0,136                | 0,106                | 6                     | 0,147                  |
| NCI_ALK2_signaling_events_Main_Pathway                                                                                         | 0,063                      | 0,013                 | 0,022                | 10                    | 0,042                  |
| NCI_Alpha_synuclein_signaling_Main_Pathway                                                                                     | 0,023                      | 0,170                 | -0,002               | 30                    | 0,011                  |
| NCI_Alpha_synuclein_signaling_Pathway_(cell_death)                                                                             | 0,024                      | 0,293                 | -0,009               | 21                    | 0,007                  |
| NCI_Alpha_synuclein_signaling_Pathway_(neuron_apoptosis)                                                                       | 0,025                      | 0,234                 | 0,003                | 22                    | 0,014                  |
| NCI_Alpha_synuclein_signaling_Pathway_(Pathway_degradation_of_SNCA)                                                            | -0,019                     | -0,082                | 0,009                | 4                     | -0,005                 |
| NCI_Alpha_synuclein_signaling_Pathway_(Pathway_negative_regulation_of_transcription_via_SNCA)                                  | -0,027                     | -0,009                | -0,042               | 3                     | -0,035                 |
| NCI_Alpha_synuclein_signaling_Pathway_(Pathway_negative_regulation_of_transcription_via_TOR1A_SNCA_STUB1_FKBP1A)               | 0,024                      | 0,293                 | -0,009               | 21                    | 0,007                  |
| NCI_Alpha_synuclein_signaling_Pathway_(Pathway_positive_regulation_of_gene_specific_transcription_via_SNCA)                    | -0,027                     | -0,009                | -0,042               | 3                     | -0,035                 |
| NCI_Alpha_synuclein_signaling_Pathway_(Pathway_positive_regulation_of_gene_specific_transcription_via_TOR1A_SNCA_FKBP1A_STUB1) | 0,024                      | 0,293                 | -0,009               | 21                    | 0,007                  |
| NCI_Alpha_synuclein_signaling_Pathway_(proteasomal_ubiquitin_dependent_protein_catabolic_process)                              | 0,024                      | 0,293                 | -0,009               | 21                    | 0,007                  |
| NCI_Alpha_synuclein_signaling_Pathway_(protein_targeting_to_lysome)                                                            | 0,024                      | 0,293                 | -0,009               | 21                    | 0,007                  |
| NCI_Alpha4_beta1_integrin_signaling_events_Main_Pathway                                                                        | -0,006                     | -0,040                | 0,031                | 20                    | 0,013                  |

| Pathway                                                                                                                        | Tumour_MDA_MB.231_Invasive | Tumour_AU565_Invasive | Tumour_T47D_Invasive | Number of genes in PW | Mean (MDA_MB.231_T47D) |
|--------------------------------------------------------------------------------------------------------------------------------|----------------------------|-----------------------|----------------------|-----------------------|------------------------|
| NCI_Alpha4_beta1_integrin_signaling_events_Pathway_(cell_adhesion)                                                             | 0,044                      | -0,102                | 0,025                | 12                    | 0,035                  |
| NCI_Alpha4_beta1_integrin_signaling_events_Pathway_(cell_migration)                                                            | -0,022                     | -0,042                | 0,022                | 10                    | -0,000                 |
| NCI_Alpha4_beta1_integrin_signaling_events_Pathway_(lamellipodium_assembly)                                                    | -0,000                     | 0,036                 | 0,031                | 8                     | 0,015                  |
| NCI_Alpha6_beta4_integrin_ligand_interactions_Main_Pathway                                                                     | -0,050                     | -0,211                | 0,050                | 11                    | -0,000                 |
| NCI_Alpha9_beta1_integrin_signaling_events_Main_Pathway                                                                        | 0,060                      | -0,144                | 0,024                | 21                    | 0,042                  |
| NCI_Alpha9_beta1_integrin_signaling_events_Pathway_(cell_migration)                                                            | 0,018                      | -0,168                | 0,006                | 8                     | 0,012                  |
| NCI_AlphaE_beta7_integrin_cell_surface_interactions_Main_Pathway                                                               | -0,170                     | 0,209                 | -0,045               | 3                     | -0,108                 |
| NCI_Alternative_NF_kappaB_Main_Pathway                                                                                         | 0,120                      | -0,435                | 0,208                | 5                     | 0,164                  |
| NCI_Alternative_NF_kappaB_Pathway_(regulation_of_B_cell_activation)                                                            | 0,120                      | -0,435                | 0,208                | 5                     | 0,164                  |
| NCI_amb2_Integrin_signaling_Main_Pathway                                                                                       | 0,031                      | -0,086                | 0,027                | 30                    | 0,029                  |
| NCI_amb2_Integrin_signaling_Pathway_(actin_filament_polymerization)                                                            | -0,011                     | 0,054                 | -0,021               | 5                     | -0,016                 |
| NCI_amb2_Integrin_signaling_Pathway_(dendritic_cell_antigen_processing_and_presentation)                                       | 0,103                      | -0,207                | 0,094                | 7                     | 0,098                  |
| NCI_amb2_Integrin_signaling_Pathway_(leukocyte_adhesion)                                                                       | 0,063                      | -0,116                | 0,049                | 9                     | 0,056                  |
| NCI_amb2_Integrin_signaling_Pathway_(phagocytosis_triggered_by_activation_of_immune_response_cell_surface_activating_receptor) | 0,103                      | -0,207                | 0,094                | 7                     | 0,098                  |
| NCI_amb2_Integrin_signaling_Pathway_(positive_regulation_of_phagocytosis)                                                      | 0,069                      | -0,196                | 0,086                | 9                     | 0,078                  |
| NCI_Angiopoietin_receptor_Tie2_mediated_signaling_Main_Pathway                                                                 | -0,133                     | -0,007                | 0,015                | 39                    | -0,059                 |
| NCI_Angiopoietin_receptor_Tie2_mediated_signaling_Pathway_(chemokinesis)                                                       | -0,034                     | 0,052                 | -0,015               | 8                     | -0,024                 |
| NCI_Angiopoietin_receptor_Tie2_mediated_signaling_Pathway_(MAPKK_cascade)                                                      | -0,031                     | 0,038                 | -0,005               | 6                     | -0,018                 |
| NCI_Angiopoietin_receptor_Tie2_mediated_signaling_Pathway_(negative_regulation_of_caspase_activity)                            | 0,006                      | -0,030                | 0,021                | 8                     | 0,013                  |
| NCI_Angiopoietin_receptor_Tie2_mediated_signaling_Pathway_(tube_development)                                                   | -0,001                     | 0,049                 | 0,028                | 3                     | 0,014                  |
| NCI_Angiopoietin_receptor_Tie2_mediated_signaling_Pathway_(vasculogenesis)                                                     | 0,014                      | -0,070                | 0,056                | 4                     | 0,035                  |
| NCI_AP_1_transcription_factor_network_Main_Pathway                                                                             | -0,068                     | 0,012                 | 0,081                | 22                    | 0,007                  |
| NCI_Arf1_Main_Pathway                                                                                                          | 0,006                      | -0,075                | 0,034                | 20                    | 0,020                  |
| NCI_Arf1_Pathway_(actin_filament_polymerization)                                                                               | -0,009                     | 0,036                 | -0,041               | 6                     | -0,025                 |
| NCI_Arf6_downstream_Main_Pathway                                                                                               | 0,005                      | 0,006                 | 0,018                | 15                    | 0,012                  |
| NCI_Arf6_downstream_Pathway_(actin_filament_bundle_formation)                                                                  | 0,037                      | -0,107                | 0,026                | 2                     | 0,031                  |
| NCI_Arf6_downstream_Pathway_(cortical_actin_cytoskeleton_organization)                                                         | -0,126                     | 0,170                 | -0,042               | 5                     | -0,084                 |
| NCI_Arf6_downstream_Pathway_(lamellipodium_assembly)                                                                           | -0,126                     | 0,170                 | -0,042               | 5                     | -0,084                 |
| NCI_Arf6_downstream_Pathway_(liver_development)                                                                                | -0,077                     | 0,071                 | -0,132               | 1                     | -0,105                 |
| NCI_Arf6_downstream_Pathway_(myoblast_fusion)                                                                                  | -0,077                     | 0,071                 | -0,132               | 1                     | -0,105                 |
| NCI_Arf6_downstream_Pathway_(regulation_of_axonogenesis)                                                                       | 0,063                      | -0,145                | 0,079                | 4                     | 0,071                  |
| NCI_Arf6_downstream_Pathway_(regulation_of_epithelial_cell_migration)                                                          | -0,077                     | 0,071                 | -0,132               | 1                     | -0,105                 |
| NCI_Arf6_downstream_Pathway_(ruffle_organization)                                                                              | 0,063                      | -0,145                | 0,079                | 4                     | 0,071                  |
| NCI_Arf6_downstream_Pathway_(substrate_adhesion_dependent_cell_spreading)                                                      | -0,077                     | 0,071                 | -0,132               | 1                     | -0,105                 |
| NCI_Arf6_downstream_Pathway_(Tumor_Cell_Invasion)                                                                              | 0,025                      | -0,004                | -0,042               | 3                     | -0,008                 |
| NCI_Arf6_signaling_events_Main_Pathway                                                                                         | -0,011                     | -0,169                | 0,037                | 35                    | 0,013                  |
| NCI_Arf6_trafficking_events_Main_Pathway                                                                                       | -0,021                     | -0,019                | 0,027                | 44                    | 0,003                  |
| NCI_Arf6_trafficking_events_Pathway_(calcium_ion_dependent_exocytosis)                                                         | -0,068                     | 0,119                 | -0,013               | 12                    | -0,040                 |
| NCI_Arf6_trafficking_events_Pathway_(cell_adhesion_mediated_by_integrin)                                                       | 0,025                      | -0,205                | 0,079                | 14                    | 0,052                  |
| NCI_Arf6_trafficking_events_Pathway_(clathrin_coat_assembly)                                                                   | -0,058                     | 0,087                 | -0,010               | 13                    | -0,034                 |
| NCI_Arf6_trafficking_events_Pathway_(clathrin_independent_pinocytosis)                                                         | -0,077                     | 0,071                 | -0,132               | 1                     | -0,105                 |
| NCI_Arf6_trafficking_events_Pathway_(endocytosis)                                                                              | -0,078                     | 0,254                 | -0,024               | 3                     | -0,051                 |
| NCI_Arf6_trafficking_events_Pathway_(membrane_fusion)                                                                          | -0,083                     | 0,083                 | -0,029               | 5                     | -0,056                 |
| NCI_Arf6_trafficking_events_Pathway_(positive_regulation_of_endocytosis)                                                       | -0,077                     | 0,071                 | -0,132               | 1                     | -0,105                 |
| NCI_Arf6_trafficking_events_Pathway_(positive_regulation_of_phagocytosis)                                                      | -0,038                     | 0,036                 | -0,066               | 2                     | -0,052                 |
| NCI_Arf6_trafficking_events_Pathway_(receptor_recycling)                                                                       | -0,077                     | 0,071                 | -0,132               | 1                     | -0,105                 |
| NCI_Arf6_trafficking_events_Pathway_(regulation_of_calcium_dependent_cell_adhesion)                                            | -0,066                     | 0,168                 | -0,001               | 6                     | -0,034                 |
| NCI_Arf6_trafficking_events_Pathway_(substrate_adhesion_dependent_cell_spreading)                                              | -0,042                     | -0,006                | -0,016               | 8                     | -0,029                 |
| NCI_ATF_2_transcription_factor_network_Main_Pathway                                                                            | -0,001                     | 0,011                 | 0,022                | 41                    | 0,010                  |
| NCI_ATM_Main_Pathway                                                                                                           | -0,013                     | 0,043                 | 0,002                | 32                    | -0,005                 |
| NCI_ATM_Pathway_(apoptosis)                                                                                                    | -0,061                     | 0,260                 | -0,074               | 3                     | -0,068                 |
| NCI_ATM_Pathway_(chromatin_remodeling)                                                                                         | 0,007                      | 0,057                 | 0,022                | 9                     | 0,014                  |

| Pathway                                                                                           | Tumour_MDA_MB.231_Invasive | Tumour_AU565_Invasive | Tumour_T47D_Invasive | Number of genes in PW | Mean (MDA_MB.231_T47D) |
|---------------------------------------------------------------------------------------------------|----------------------------|-----------------------|----------------------|-----------------------|------------------------|
| NCI_ATM_Pathway_(double_strand_break_repair_via_nonhomologous_end_joining)                        | 0,018                      | 0,023                 | 0,017                | 9                     | 0,017                  |
| NCI_ATM_Pathway_(G1_S_transition_checkpoint)                                                      | 0,006                      | 0,012                 | 0,010                | 21                    | 0,008                  |
| NCI_ATM_Pathway_(G2_M_transition_checkpoint)                                                      | -0,112                     | 0,210                 | -0,013               | 6                     | -0,062                 |
| NCI_ATM_Pathway_(Pathway_rRNA_transcription_via_ATM)                                              | -0,026                     | 0,041                 | 0,023                | 6                     | -0,002                 |
| NCI_ATR_signaling_Main_Pathway                                                                    | -0,023                     | 0,056                 | -0,021               | 27                    | -0,022                 |
| NCI_ATR_signaling_Pathway_(Pathway_negative_regulation_of_transcription_during_mitosis_via_CHEK1) | -0,048                     | 0,064                 | -0,004               | 22                    | -0,026                 |
| NCI_ATR_signaling_Pathway_(regulation_of_double_strand_break_repair_via_homologous_recombination) | -0,030                     | 0,055                 | -0,012               | 24                    | -0,021                 |
| NCI_ATR_signaling_Pathway_(response_to_G2_M_transition_DNA_damage_checkpoint_signal)              | -0,046                     | 0,062                 | -0,004               | 23                    | -0,025                 |
| NCI_Atypical_NF_kappaB_Main_Pathway                                                               | -0,035                     | 0,029                 | 0,033                | 13                    | -0,001                 |
| NCI_Atypical_NF_kappaB_Pathway_(Pathway_degradation_of_NFKB1_NFKBIA)                              | -0,040                     | 0,035                 | 0,024                | 11                    | -0,008                 |
| NCI_Atypical_NF_kappaB_Pathway_(Pathway_degradation_of_NFKBIA)                                    | 0,085                      | -0,152                | 0,080                | 4                     | 0,083                  |
| NCI_Atypical_NF_kappaB_Pathway_(positive_regulation_of_anti_apoptosis)                            | -0,047                     | 0,028                 | 0,044                | 10                    | -0,001                 |
| NCI_Aurora_A_signaling_Main_Pathway                                                               | 0,015                      | -0,055                | -0,002               | 30                    | 0,007                  |
| NCI_Aurora_A_signaling_Pathway_(centrosome_duplication)                                           | -0,002                     | 0,006                 | -0,014               | 10                    | -0,008                 |
| NCI_Aurora_A_signaling_Pathway_(negative_regulation_of_DNA_binding)                               | 0,051                      | -0,121                | -0,007               | 9                     | 0,022                  |
| NCI_Aurora_A_signaling_Pathway_(proteasomal_ubiquitin_dependent_protein_catabolic_process)        | 0,023                      | -0,105                | -0,007               | 8                     | 0,008                  |
| NCI_Aurora_A_signaling_Pathway_(protein_catabolic_process)                                        | 0,073                      | -0,171                | 0,001                | 10                    | 0,037                  |
| NCI_Aurora_A_signaling_Pathway_(regulation_of Centrosome_cycle)                                   | 0,034                      | -0,128                | 0,006                | 9                     | 0,020                  |
| NCI_Aurora_A_signaling_Pathway_(spindle_assembly)                                                 | 0,039                      | -0,100                | -0,003               | 10                    | 0,018                  |
| NCI_Aurora_B_signaling_Main_Pathway                                                               | -0,022                     | 0,023                 | 0,003                | 39                    | -0,009                 |
| NCI_Aurora_B_signaling_Pathway_(cytokinesis)                                                      | 0,028                      | -0,111                | 0,014                | 12                    | 0,021                  |
| NCI_Aurora_C_signaling_Main_Pathway                                                               | -0,003                     | -0,130                | -0,034               | 4                     | -0,018                 |
| NCI_BARD1_signaling_events_Main_Pathway                                                           | -0,013                     | 0,036                 | -0,023               | 23                    | -0,018                 |
| NCI_BARD1_signaling_events_Pathway_(DNA_damage_checkpoint)                                        | -0,024                     | 0,059                 | -0,053               | 3                     | -0,038                 |
| NCI_BARD1_signaling_events_Pathway_(DNA_repair)                                                   | -0,006                     | 0,037                 | -0,014               | 20                    | -0,010                 |
| NCI_BARD1_signaling_events_Pathway_(protein_ubiquitination)                                       | -0,036                     | 0,062                 | -0,001               | 11                    | -0,019                 |
| NCI_BCR_signaling_Main_Pathway                                                                    | 0,004                      | 0,050                 | 0,016                | 60                    | 0,010                  |
| NCI_BCR_signaling_Pathway_(actin_cytoskeleton_organization)                                       | -0,127                     | 0,682                 | -0,042               | 8                     | -0,084                 |
| NCI_BCR_signaling_Pathway_(cell_survival)                                                         | -0,116                     | 0,626                 | -0,013               | 8                     | -0,065                 |
| NCI_BCR_signaling_Pathway_(cytokine_secretion)                                                    | -0,064                     | 0,332                 | 0,008                | 15                    | -0,028                 |
| NCI_BCR_signaling_Pathway_(re_entry_into_mitotic_cell_cycle)                                      | -0,040                     | 0,319                 | 0,000                | 13                    | -0,020                 |
| NCI_BCR_signaling_Pathway_(ubiquitin_dependent_protein_catabolic_process)                         | 0,046                      | -0,100                | 0,052                | 13                    | 0,049                  |
| NCI_Beta1_integrin_cell_surface_interactions_Main_Pathway                                         | 0,045                      | -0,149                | 0,048                | 66                    | 0,046                  |
| NCI_Beta2_integrin_cell_surface_interactions_Main_Pathway                                         | 0,061                      | -0,131                | 0,077                | 29                    | 0,069                  |
| NCI_Beta3_integrin_cell_surface_interactions_Main_Pathway                                         | 0,027                      | -0,110                | 0,024                | 39                    | 0,025                  |
| NCI_Beta5_beta6_beta7_and_beta8_integrin_cell_surface_interactions_Main_Pathway                   | 0,008                      | -0,044                | 0,029                | 14                    | 0,018                  |
| NCI_BMP_receptor_signaling_Main_Pathway                                                           | 0,004                      | 0,003                 | -0,001               | 38                    | 0,001                  |
| NCI_C_MYB_transcription_factor_network_Main_Pathway                                               | -0,005                     | 0,072                 | 0,008                | 75                    | 0,001                  |
| NCI_C_MYC_Main_Pathway                                                                            | -0,057                     | 0,058                 | -0,049               | 25                    | -0,053                 |
| NCI_Calcineurin_regulated_NFAT_dependent_transcription_in_lymphocytes_Main_Pathway                | -0,070                     | 0,069                 | 0,084                | 31                    | 0,007                  |
| NCI_Calcineurin_regulated_NFAT_dependent_transcription_in_lymphocytes_Pathway_(T_cell_anergy)     | -0,053                     | 0,155                 | 0,092                | 8                     | 0,020                  |
| NCI_Calcium_signaling_in_the_CD4_TCR_Main_Pathway                                                 | -0,091                     | -0,028                | 0,107                | 20                    | 0,008                  |
| NCI_Canonical_NF_kappaB_Main_Pathway                                                              | 0,027                      | -0,074                | 0,031                | 23                    | 0,029                  |
| NCI_Canonical_NF_kappaB_Pathway_(proteasomal_ubiquitin_dependent_protein_catabolic_process)       | 0,012                      | -0,078                | 0,039                | 11                    | 0,025                  |
| NCI_Canonical_Wnt_signaling_Main_Pathway                                                          | -0,011                     | -0,034                | 0,035                | 20                    | 0,012                  |
| NCI_Caspase_Cascade_in_Apoptosis_Main_Pathway                                                     | -0,138                     | 0,142                 | -0,001               | 47                    | -0,069                 |
| NCI_Caspase_Cascade_in_Apoptosis_Pathway_(actin_filament_polymerization)                          | -0,165                     | 0,508                 | -0,183               | 3                     | -0,174                 |
| NCI_Caspase_Cascade_in_Apoptosis_Pathway_(apoptosis)                                              | 0,057                      | -0,109                | 0,040                | 10                    | 0,048                  |
| NCI_Caspase_Cascade_in_Apoptosis_Pathway_(apoptotic_nuclear_changes)                              | 0,089                      | -0,162                | 0,069                | 9                     | 0,079                  |
| NCI_Caspase_Cascade_in_Apoptosis_Pathway_(DNA_fragmentation_during_apoptosis)                     | 0,027                      | 0,010                 | 0,015                | 12                    | 0,021                  |
| NCI_Caspase_Cascade_in_Apoptosis_Pathway_(DNA_repair)                                             | 0,031                      | -0,029                | 0,066                | 10                    | 0,049                  |
| NCI_Caspase_Cascade_in_Apoptosis_Pathway_(JNK_cascade)                                            | 0,035                      | -0,043                | 0,014                | 9                     | 0,024                  |



| Pathway                                                                                                                         | Tumour_MDA_MB.231_Invasive | Tumour_AU565_Invasive | Tumour_T47D_Invasive | Number of genes in PW | Mean (MDA_MB.231_T47D) |
|---------------------------------------------------------------------------------------------------------------------------------|----------------------------|-----------------------|----------------------|-----------------------|------------------------|
| NCI_Caspase_Cascade_in_Apoptosis_Pathway_(neuron_apoptosis)                                                                     | -0,335                     | 0,370                 | -0,020               | 14                    | -0,178                 |
| NCI_Caspase_Cascade_in_Apoptosis_Pathway_(nuclear_fragmentation_during_apoptosis)                                               | 0,031                      | -0,044                | 0,027                | 10                    | 0,029                  |
| NCI_Caspase_Cascade_in_Apoptosis_Pathway_(positive_regulation_of_apoptosis)                                                     | -0,111                     | 0,111                 | -0,065               | 6                     | -0,088                 |
| NCI_CD40_CD40L_signaling_Main_Pathway                                                                                           | 0,040                      | -0,055                | 0,023                | 25                    | 0,031                  |
| NCI_CD40_CD40L_signaling_Pathway_(B_cell_affinity_maturation)                                                                   | 0,019                      | 0,223                 | -0,082               | 4                     | -0,031                 |
| NCI_CD40_CD40L_signaling_Pathway_(B_cell_proliferation)                                                                         | -0,052                     | 0,262                 | -0,105               | 4                     | -0,078                 |
| NCI_CD40_CD40L_signaling_Pathway_(plasma_cell_differentiation)                                                                  | 0,019                      | 0,223                 | -0,082               | 4                     | -0,031                 |
| NCI_CD40_CD40L_signaling_Pathway_(proteasomal_ubiquitin_dependent_protein_catabolic_process)                                    | -0,052                     | 0,262                 | -0,105               | 4                     | -0,078                 |
| NCI_CD40_CD40L_signaling_Pathway_(regulation_of_germinal_center_formation)                                                      | 0,005                      | 0,167                 | -0,056               | 8                     | -0,025                 |
| NCI_CD40_CD40L_signaling_Pathway_(regulation_of_isotype_switching_to_IgE_isotypes)                                              | 0,005                      | 0,167                 | -0,056               | 8                     | -0,025                 |
| NCI_CD40_CD40L_signaling_Pathway_(regulation_of_isotype_switching_to_IgG_isotypes)                                              | -0,052                     | 0,262                 | -0,105               | 4                     | -0,078                 |
| NCI_CDC42_signaling_events_Main_Pathway                                                                                         | -0,068                     | -0,031                | 0,024                | 58                    | -0,022                 |
| NCI_CDC42_signaling_events_Pathway_(actin_cytoskeleton_organization)                                                            | 0,039                      | -0,135                | 0,039                | 15                    | 0,039                  |
| NCI_CDC42_signaling_events_Pathway_(actin_filament_depolymerization)                                                            | -0,027                     | 0,092                 | -0,005               | 5                     | -0,016                 |
| NCI_CDC42_signaling_events_Pathway_(cell_motility)                                                                              | -0,013                     | 0,042                 | 0,005                | 8                     | -0,004                 |
| NCI_CDC42_signaling_events_Pathway_(cell_proliferation)                                                                         | -0,025                     | 0,209                 | -0,022               | 1                     | -0,024                 |
| NCI_CDC42_signaling_events_Pathway_(cytokinesis)                                                                                | -0,025                     | 0,209                 | -0,022               | 1                     | -0,024                 |
| NCI_CDC42_signaling_events_Pathway_(establishment_of_cell_polarity)                                                             | -0,007                     | 0,112                 | -0,087               | 3                     | -0,047                 |
| NCI_CDC42_signaling_events_Pathway_(neuron_projection_development)                                                              | 0,002                      | 0,002                 | -0,015               | 7                     | -0,007                 |
| NCI_CDC42_signaling_events_Pathway_(Pathway_positive_regulation_of_NF_kappaB_transcription_factor_activity_via_CDC42)           | -0,013                     | 0,057                 | -0,018               | 6                     | -0,016                 |
| NCI_CDC42_signaling_events_Pathway_(regulation_of_filopodium_assembly)                                                          | 0,019                      | 0,064                 | -0,028               | 7                     | -0,004                 |
| NCI_CDC42_signaling_events_Pathway_(retrograde_vesicle_mediated_transport_Golgi_to_ER)                                          | 0,040                      | -0,183                | 0,049                | 10                    | 0,044                  |
| NCI_CDC42_signaling_events_Pathway_(RNA_splicing)                                                                               | -0,625                     | 0,047                 | 0,032                | 8                     | -0,296                 |
| NCI_Cellular_roles_of_Anthrax_toxin_Main_Pathway                                                                                | -0,029                     | 0,077                 | -0,038               | 16                    | -0,034                 |
| NCI_Cellular_roles_of_Anthrax_toxin_Pathway_(apoptosis)                                                                         | 0                          | 0                     | 0                    | 2                     | 0                      |
| NCI_Cellular_roles_of_Anthrax_toxin_Pathway_(inflammatory_response)                                                             | 0                          | 0                     | 0                    | 2                     | 0                      |
| NCI_Cellular_roles_of_Anthrax_toxin_Pathway_(macrophage_activation)                                                             | 0,025                      | -0,012                | -0,010               | 4                     | 0,008                  |
| NCI_Cellular_roles_of_Anthrax_toxin_Pathway_(MAPKKK_cascade)                                                                    | -0,081                     | 0,183                 | -0,081               | 7                     | -0,081                 |
| NCI_Cellular_roles_of_Anthrax_toxin_Pathway_(monocyte_activation)                                                               | 0                          | 0                     | 0                    | 4                     | 0                      |
| NCI_Cellular_roles_of_Anthrax_toxin_Pathway_(necrosis)                                                                          | 0                          | 0                     | 0                    | 2                     | 0                      |
| NCI_Cellular_roles_of_Anthrax_toxin_Pathway_(negative_regulation_of_macrophage_activation)                                      | 0                          | 0                     | 0                    | 2                     | 0                      |
| NCI_Cellular_roles_of_Anthrax_toxin_Pathway_(negative_regulation_of_myeloid_dendritic_cell_antigen_processing_and_presentation) | 0                          | 0                     | 0                    | 2                     | 0                      |
| NCI_Cellular_roles_of_Anthrax_toxin_Pathway_(negative_regulation_of_phagocytosis)                                               | 0                          | 0                     | 0                    | 2                     | 0                      |
| NCI_Cellular_roles_of_Anthrax_toxin_Pathway_(platelet_activation)                                                               | 0                          | 0                     | 0                    | 2                     | 0                      |
| NCI_Cellular_roles_of_Anthrax_toxin_Pathway_(regulation_of_endothelial_cell_proliferation)                                      | 0                          | 0                     | 0                    | 2                     | 0                      |
| NCI_Ceramide_signaling_Main_Pathway                                                                                             | 0,002                      | -0,003                | 0,013                | 48                    | 0,007                  |
| NCI_Ceramide_signaling_Pathway_(cell_survival)                                                                                  | -0,026                     | 0,047                 | -0,003               | 18                    | -0,015                 |
| NCI_Ceramide_signaling_Pathway_(ganglioside_biosynthetic_process)                                                               | -0,027                     | 0,045                 | 0,002                | 17                    | -0,012                 |
| NCI_Ceramide_signaling_Pathway_(negative_regulation_of_cell_cycle)                                                              | -0,029                     | 0,054                 | 0,002                | 17                    | -0,014                 |
| NCI_Ceramide_signaling_Pathway_(regulation_of_nitric_oxide_biosynthetic_process)                                                | 0,015                      | -0,069                | 0,070                | 6                     | 0,043                  |
| NCI_Circadian_rhythm_Main_Pathway                                                                                               | -0,016                     | 0,051                 | -0,014               | 5                     | -0,015                 |
| NCI_Circadian_rhythm_Pathway_(chromatin_modification)                                                                           | -0,016                     | 0,051                 | -0,014               | 5                     | -0,015                 |
| NCI_Circadian_rhythm_Pathway_(S_phase_of_mitotic_cell_cycle)                                                                    | -0,016                     | 0,051                 | -0,014               | 5                     | -0,015                 |
| NCI_Class_I_PI3K_signaling_events_Main_Pathway                                                                                  | -0,036                     | 0,235                 | -0,013               | 41                    | -0,024                 |
| NCI_Class_I_PI3K_signaling_events_mediated_by_Akt_Main_Pathway                                                                  | -0,026                     | -0,026                | 0,001                | 34                    | -0,012                 |
| NCI_Class_I_PI3K_signaling_events_mediated_by_Akt_Pathway_(cell_survival)                                                       | 0,006                      | -0,102                | 0,025                | 12                    | 0,016                  |
| NCI_Class_I_PI3K_signaling_events_mediated_by_Akt_Pathway_(G1_S_transition_of_mitotic_cell_cycle)                               | 0,002                      | -0,085                | 0,021                | 13                    | 0,012                  |
| NCI_Class_I_PI3K_signaling_events_mediated_by_Akt_Pathway_(glucose_import)                                                      | -0,006                     | 0,050                 | -0,024               | 3                     | -0,015                 |

| Pathway                                                                                                                  | Tumour_MDA_MB.231_Invasive | Tumour_AU565_Invasive | Tumour_T47D_Invasive | Number of genes in PW | Mean (MDA_MB.231_T47D) |
|--------------------------------------------------------------------------------------------------------------------------|----------------------------|-----------------------|----------------------|-----------------------|------------------------|
| NCI_Class_I_P13K_signaling_events_mediated_by_Akt_Pathway_(negative_regulation_of_cell_cycle)                            | -0,021                     | -0,032                | 0,002                | 25                    | -0,010                 |
| NCI_Class_I_P13K_signaling_events_Pathway_(actin_cytoskeleton_reorganization)                                            | -0,032                     | 0,161                 | -0,008               | 13                    | -0,020                 |
| NCI_Class_I_P13K_signaling_events_Pathway_(cell_survival)                                                                | -0,008                     | 0,065                 | 0,002                | 14                    | -0,003                 |
| NCI_Class_IB_P13K_non_lipid_kinase_events_Main_Pathway                                                                   | 0,038                      | 0,041                 | -0,024               | 5                     | 0,007                  |
| NCI_Class_IB_P13K_non_lipid_kinase_events_Pathway_(cAMP_biosynthetic_process)                                            | 0                          | 0                     | 0                    | 3                     | 0                      |
| NCI_Coregulation_of_Androgen_receptor_activity_Main_Pathway                                                              | 0,005                      | 0,004                 | -0,002               | 14                    | 0,001                  |
| NCI_Coregulation_of_Androgen_receptor_activity_Pathway_(cell_proliferation)                                              | 0,016                      | 0,004                 | 0,004                | 6                     | 0,010                  |
| NCI_CXCR3_mediated_signaling_events_Main_Pathway                                                                         | -0,027                     | -0,007                | 0,010                | 38                    | -0,008                 |
| NCI_CXCR3_mediated_signaling_events_Pathway_(actin_polymerization_or_depolymerization)                                   | -0,032                     | -0,028                | 0,007                | 14                    | -0,013                 |
| NCI_CXCR3_mediated_signaling_events_Pathway_(cAMP_biosynthetic_process)                                                  | 0                          | 0                     | 0                    | 5                     | 0                      |
| NCI_CXCR3_mediated_signaling_events_Pathway_(cell_adhesion)                                                              | -0,067                     | -0,079                | 0,018                | 16                    | -0,024                 |
| NCI_CXCR3_mediated_signaling_events_Pathway_(cell_proliferation)                                                         | -0,014                     | -0,014                | -0,003               | 23                    | -0,008                 |
| NCI_CXCR3_mediated_signaling_events_Pathway_(chemotaxis)                                                                 | -0,029                     | -0,022                | 0,001                | 18                    | -0,014                 |
| NCI_CXCR3_mediated_signaling_events_Pathway_(regulation_of_stress_fiber_assembly)                                        | 0                          | 0                     | 0                    | 5                     | 0                      |
| NCI_CXCR4_mediated_signaling_events_Main_Pathway                                                                         | -0,004                     | 0,066                 | -0,003               | 76                    | -0,004                 |
| NCI_CXCR4_mediated_signaling_events_Pathway_(actin_filament_depolymerization)                                            | 0                          | 0                     | 0                    | 1                     | 0                      |
| NCI_CXCR4_mediated_signaling_events_Pathway_(cell_adhesion)                                                              | -0,025                     | 0,236                 | -0,024               | 28                    | -0,024                 |
| NCI_CXCR4_mediated_signaling_events_Pathway_(cell_proliferation)                                                         | -0,001                     | 0,004                 | -0,000               | 11                    | -0,000                 |
| NCI_CXCR4_mediated_signaling_events_Pathway_(chemotaxis)                                                                 | -0,014                     | 0,031                 | -0,005               | 60                    | -0,010                 |
| NCI_CXCR4_mediated_signaling_events_Pathway_(establishment_of_cell_polarity)                                             | -0,034                     | 0,055                 | -0,016               | 17                    | -0,025                 |
| NCI_CXCR4_mediated_signaling_events_Pathway_(positive_regulation_of_lamellipodium_assembly)                              | -0,112                     | 0,278                 | -0,060               | 4                     | -0,086                 |
| NCI_CXCR4_mediated_signaling_events_Pathway_(regulation_of_heterotypic_cell_cell_adhesion)                               | -0,001                     | 0,004                 | -0,000               | 12                    | -0,000                 |
| NCI_Degradation_of_beta_catenin_Main_Pathway                                                                             | 0,005                      | -0,012                | 0,002                | 18                    | 0,004                  |
| NCI_Direct_p53_effectors_Main_Pathway                                                                                    | -0,076                     | 0,083                 | -0,042               | 7                     | -0,059                 |
| NCI_DNA_PK_pathway_in_nonhomologous_end_joining_Main_Pathway                                                             | 0,005                      | -0,003                | -0,017               | 13                    | -0,006                 |
| NCI_DNA_PK_pathway_in_nonhomologous_end_joining_Pathway_(double_strand_break_repair_via_homologous_recombination)        | -0,040                     | 0,022                 | -0,053               | 4                     | -0,047                 |
| NCI_DNA_PK_pathway_in_nonhomologous_end_joining_Pathway_(double_strand_break_repair_via_nonhomologous_end_joining)       | 0,005                      | -0,003                | -0,017               | 13                    | -0,006                 |
| NCI_DNA_PK_pathway_in_nonhomologous_end_joining_Pathway_(immunoglobulin_heavy_chain_V_D_J_recombination)                 | -0,016                     | 0,028                 | -0,026               | 7                     | -0,021                 |
| NCI_DNA_PK_pathway_in_nonhomologous_end_joining_Pathway_(immunoglobulin_light_chain_V_J_recombination)                   | -0,016                     | 0,028                 | -0,026               | 7                     | -0,021                 |
| NCI_DNA_PK_pathway_in_nonhomologous_end_joining_Pathway_(V_D_J_recombination)                                            | 0,006                      | 0,001                 | -0,016               | 10                    | -0,005                 |
| NCI_Downstream_signaling_in_naive_CD8_T_cells_Main_Pathway                                                               | -0,047                     | 0,088                 | 0,035                | 41                    | -0,006                 |
| NCI_Downstream_signaling_in_naive_CD8_T_cells_Pathway_(alpha_beta_T_cell_proliferation)                                  | 0                          | 0                     | 0                    | 1                     | 0                      |
| NCI_Downstream_signaling_in_naive_CD8_T_cells_Pathway_(Pathway_regulation_of_survival_gene_product_expression_via_IL2RG) | -0,060                     | 0,045                 | 0,023                | 11                    | -0,019                 |
| NCI_E_cadherin_signaling_in_keratinocytes_Main_Pathway                                                                   | -0,004                     | -0,070                | 0,032                | 21                    | 0,014                  |
| NCI_E_cadherin_signaling_in_keratinocytes_Pathway_(actin_cable_formation)                                                | -0,034                     | 0,022                 | -0,002               | 9                     | -0,018                 |
| NCI_E_cadherin_signaling_in_keratinocytes_Pathway_(adherens_junction_organization)                                       | -0,014                     | 0,036                 | -0,009               | 10                    | -0,011                 |
| NCI_E_cadherin_signaling_in_keratinocytes_Pathway_(apoptosis)                                                            | 0,019                      | -0,035                | 0,027                | 10                    | 0,023                  |
| NCI_E_cadherin_signaling_in_keratinocytes_Pathway_(establishment_of_polarity_of_embryonic_epithelium)                    | -0,038                     | 0,025                 | -0,002               | 8                     | -0,020                 |
| NCI_E_cadherin_signaling_in_keratinocytes_Pathway_(keratinocyte_differentiation)                                         | 0,027                      | -0,060                | 0,035                | 13                    | 0,031                  |
| NCI_E_cadherin_signaling_in_the_nascent_adherens_junction_Main_Pathway                                                   | -0,005                     | -0,032                | 0,024                | 33                    | 0,009                  |
| NCI_E_cadherin_signaling_in_the_nascent_adherens_junction_Pathway_(actin_cytoskeleton_organization)                      | 0,004                      | 0,048                 | 0,004                | 6                     | 0,004                  |
| NCI_E_cadherin_signaling_in_the_nascent_adherens_junction_Pathway_(adherens_junction_assembly)                           | -0,054                     | 0,162                 | -0,002               | 6                     | -0,028                 |
| NCI_E_cadherin_signaling_in_the_nascent_adherens_junction_Pathway_(regulation_of_actin_nucleation)                       | -0,021                     | -0,006                | 0,013                | 12                    | -0,004                 |

| Pathway                                                                                                                | Tumour_MDA_MB.231_Invasive | Tumour_AU565_Invasive | Tumour_T47D_Invasive | Number of genes in PW | Mean (MDA_MB.231_T47D) |
|------------------------------------------------------------------------------------------------------------------------|----------------------------|-----------------------|----------------------|-----------------------|------------------------|
| NCI_E_cadherin_signaling_in_the_nascent_adherens_junction_Pathway_(regulation_of_calcium_dependent_cell_cell_adhesion) | -0,063                     | 0,157                 | -0,015               | 5                     | -0,039                 |
| NCI_E_cadherin_signaling_in_the_nascent_adherens_junction_Pathway_(regulation_of_cell_cell_adhesion)                   | -0,030                     | -0,028                | 0,022                | 4                     | -0,004                 |
| NCI_E2F_transcription_factor_network_Main_Pathway                                                                      | -0,022                     | 0,073                 | -0,028               | 40                    | -0,025                 |
| NCI_Effects_of_Botulinum_toxin_Main_Pathway                                                                            | 0,009                      | -0,047                | 0,044                | 4                     | 0,027                  |
| NCI_EGFR_dependent_Endothelin_signaling_events_Main_Pathway                                                            | -0,086                     | -0,387                | 0,112                | 4                     | 0,013                  |
| NCI_Endogenous_TLR_signaling_Main_Pathway                                                                              | -0,024                     | 0,055                 | -0,031               | 17                    | -0,027                 |
| NCI_Endogenous_TLR_signaling_Pathway_(cell_migration)                                                                  | -0,062                     | 0,150                 | -0,080               | 4                     | -0,071                 |
| NCI_Endogenous_TLR_signaling_Pathway_(cytokine_production_involved_in_inflammatory_response)                           | 0                          | 0                     | 0                    | 6                     | 0                      |
| NCI_Endogenous_TLR_signaling_Pathway_(regulation_of_apoptosis)                                                         | -0,029                     | 0,067                 | -0,038               | 11                    | -0,033                 |
| NCI_Endogenous_TLR_signaling_Pathway_(regulation_of_cell_adhesion)                                                     | -0,011                     | 0,012                 | -0,023               | 7                     | -0,017                 |
| NCI_Endogenous_TLR_signaling_Pathway_(regulation_of_cell_matrix_adhesion)                                              | -0,062                     | 0,150                 | -0,080               | 4                     | -0,071                 |
| NCI_Endogenous_TLR_signaling_Pathway_(regulation_of_cell_proliferation)                                                | -0,029                     | 0,067                 | -0,038               | 11                    | -0,033                 |
| NCI_Endogenous_TLR_signaling_Pathway_(regulation_of_granulocyte_colony_stimulating_factor_production)                  | 0                          | 0                     | 0                    | 4                     | 0                      |
| NCI_Endogenous_TLR_signaling_Pathway_(regulation_of_interleukin_1_beta_production)                                     | -0,029                     | 0,067                 | -0,038               | 11                    | -0,033                 |
| NCI_Endogenous_TLR_signaling_Pathway_(regulation_of_interleukin_10_production)                                         | 0                          | 0                     | 0                    | 4                     | 0                      |
| NCI_Endogenous_TLR_signaling_Pathway_(regulation_of_interleukin_6_production)                                          | 0                          | 0                     | 0                    | 5                     | 0                      |
| NCI_Endogenous_TLR_signaling_Pathway_(regulation_of_tumor_necrosis_factor_production)                                  | 0                          | 0                     | 0                    | 5                     | 0                      |
| NCI_Endogenous_TLR_signaling_Pathway_(respiratory_burst_involved_in_inflammatory_response)                             | -0,022                     | 0,058                 | -0,031               | 7                     | -0,026                 |
| NCI_Endothelins_Main_Pathway                                                                                           | 0,003                      | -0,051                | 0,015                | 62                    | 0,009                  |
| NCI_Endothelins_Pathway_(arachidonic_acid_secretion)                                                                   | 0,050                      | -0,146                | 0,029                | 5                     | 0,039                  |
| NCI_Endothelins_Pathway_(cAMP_biosynthetic_process)                                                                    | -0,017                     | -0,031                | 0,008                | 19                    | -0,005                 |
| NCI_Endothelins_Pathway_(positive_regulation_of_muscle_contraction)                                                    | -0,037                     | 0,024                 | -0,027               | 4                     | -0,032                 |
| NCI_Endothelins_Pathway_(regulation_of_vascular_smooth_muscle_contraction)                                             | 0,040                      | 0,014                 | -0,016               | 5                     | 0,012                  |
| NCI_EPHA_forward_signaling_Main_Pathway                                                                                | -0,009                     | 0,209                 | -0,004               | 26                    | -0,007                 |
| NCI_EPHA_forward_signaling_Pathway_(actin_filament_depolymerization)                                                   | 0                          | 0                     | 0                    | 6                     | 0                      |
| NCI_EPHA_forward_signaling_Pathway_(axon_guidance)                                                                     | -0,003                     | 0,029                 | 0,000                | 16                    | -0,001                 |
| NCI_EPHA_forward_signaling_Pathway_(cell_cell_adhesion)                                                                | -0,008                     | 0,013                 | -0,003               | 14                    | -0,005                 |
| NCI_EPHA_forward_signaling_Pathway_(proteasomal_ubiquitin_dependent_protein_catabolic_process)                         | -0,011                     | 0,248                 | -0,002               | 20                    | -0,006                 |
| NCI_EPHA_forward_signaling_Pathway_(regulation_of_stress_fiber_assembly)                                               | -0,008                     | 0,013                 | -0,003               | 14                    | -0,005                 |
| NCI_EPHA2_forward_signaling_Main_Pathway                                                                               | 0,018                      | -0,041                | 0,010                | 10                    | 0,014                  |
| NCI_EPHB_forward_signaling_Main_Pathway                                                                                | 0,012                      | 0,005                 | -0,032               | 8                     | -0,010                 |
| NCI_Ephrin_A_reverse_signaling_Main_Pathway                                                                            | -0,001                     | 0,049                 | 0,028                | 3                     | 0,014                  |
| NCI_Ephrin_A_reverse_signaling_Pathway_(beta_integrin_mediated_adhesion)                                               | -0,001                     | 0,049                 | 0,028                | 3                     | 0,014                  |
| NCI_Ephrin_A_reverse_signaling_Pathway_(MAPKKK_cascade)                                                                | 0                          | 0                     | 0                    | 2                     | 0                      |
| NCI_Ephrin_A_reverse_signaling_Pathway_(neuron_projection_morphogenesis)                                               | 0                          | 0                     | 0                    | 2                     | 0                      |
| NCI_Ephrin_B_reverse_signaling_Main_Pathway                                                                            | 0,002                      | 0,206                 | 0,021                | 20                    | 0,011                  |
| NCI_Ephrin_B_reverse_signaling_Pathway_(angiogenesis)                                                                  | -0,030                     | 0,355                 | -0,020               | 15                    | -0,025                 |
| NCI_Ephrin_B_reverse_signaling_Pathway_(cell_adhesion)                                                                 | -0,028                     | 0,314                 | -0,010               | 17                    | -0,019                 |
| NCI_Ephrin_B_reverse_signaling_Pathway_(endothelial_cell_migration)                                                    | -0,030                     | 0,355                 | -0,020               | 15                    | -0,025                 |
| NCI_Ephrin_B_reverse_signaling_Pathway_(endothelial_cell_proliferation)                                                | 0,119                      | -0,160                | -0,062               | 2                     | 0,029                  |
| NCI_EPO_signaling_Main_Pathway                                                                                         | 0,015                      | 0,157                 | 0,003                | 33                    | 0,009                  |
| NCI_EPO_signaling_Pathway_(beta_integrin_mediated_adhesion)                                                            | -0,012                     | 0,025                 | 0,000                | 7                     | -0,006                 |
| NCI_EPO_signaling_Pathway_(cell_proliferation)                                                                         | -0,012                     | 1,167                 | -0,045               | 5                     | -0,028                 |
| NCI_EPO_signaling_Pathway_(elevation_of_cytosolic_calcium_ion_concentration)                                           | -0,054                     | 1,237                 | -0,054               | 5                     | -0,054                 |
| NCI_ErbB_receptor_signaling_network_Main_Pathway                                                                       | 0,000                      | -0,253                | 0,057                | 15                    | 0,029                  |
| NCI_ErbB1_downstream_signaling_Main_Pathway                                                                            | 0,029                      | -0,098                | 0,026                | 82                    | 0,028                  |
| NCI_ErbB1_downstream_signaling_Pathway_(cell_migration)                                                                | 0,042                      | 0,050                 | -0,006               | 9                     | 0,018                  |
| NCI_ErbB1_downstream_signaling_Pathway_(cell_proliferation)                                                            | 0,022                      | -0,208                | 0,066                | 22                    | 0,044                  |
| NCI_ErbB1_downstream_signaling_Pathway_(cytoskeleton_organization)                                                     | 0,051                      | 0,104                 | 0,038                | 5                     | 0,044                  |
| NCI_ErbB1_downstream_signaling_Pathway_(lamellipodium_assembly)                                                        | 0,077                      | -0,204                | 0,030                | 7                     | 0,054                  |

| Pathway                                                                                            | Tumour_MDA_MB.231_Invasive | Tumour_AU565_Invasive | Tumour_T47D_Invasive | Number of genes in PW | Mean (MDA_MB.231_T47D) |
|----------------------------------------------------------------------------------------------------|----------------------------|-----------------------|----------------------|-----------------------|------------------------|
| NCI_ErbB1_downstream_signaling_Pathway_(ruffle_organization)                                       | 0,035                      | -0,167                | 0,049                | 18                    | 0,042                  |
| NCI_ErbB1_downstream_signaling_Pathway_(tight_junction_assembly)                                   | 0,045                      | 0,213                 | 0,003                | 3                     | 0,024                  |
| NCI_ErbB2_ErbB3_signaling_events_Main_Pathway                                                      | 0,026                      | 0,016                 | -0,011               | 33                    | 0,008                  |
| NCI_ErbB2_ErbB3_signaling_events_Pathway_(activation_of_caspase_activity)                          | 0,035                      | -0,064                | 0,065                | 7                     | 0,050                  |
| NCI_ErbB2_ErbB3_signaling_events_Pathway_(apoptosis)                                               | 0,029                      | 0,067                 | 0,008                | 8                     | 0,018                  |
| NCI_ErbB2_ErbB3_signaling_events_Pathway_(cell_migration)                                          | 0,015                      | 0,065                 | -0,039               | 6                     | -0,012                 |
| NCI_ErbB2_ErbB3_signaling_events_Pathway_(cell_proliferation)                                      | -0,098                     | 0,430                 | -0,142               | 7                     | -0,120                 |
| NCI_ErbB2_ErbB3_signaling_events_Pathway_(heart_morphogenesis)                                     | -0,043                     | 0,158                 | -0,058               | 7                     | -0,051                 |
| NCI_ErbB2_ErbB3_signaling_events_Pathway_(mammary_gland_morphogenesis)                             | -0,043                     | 0,158                 | -0,058               | 7                     | -0,051                 |
| NCI_ErbB2_ErbB3_signaling_events_Pathway_(myelination)                                             | 0,012                      | -0,058                | 0,053                | 10                    | 0,032                  |
| NCI_ErbB2_ErbB3_signaling_events_Pathway_(nervous_system_development)                              | -0,043                     | 0,158                 | -0,058               | 7                     | -0,051                 |
| NCI_ErbB4_signaling_events_Pathway                                                                 | -0,011                     | -0,005                | 0,014                | 27                    | 0,002                  |
| NCI_ErbB4_signaling_events_Pathway_(apoptosis)                                                     | 0,018                      | -0,023                | 0,024                | 10                    | 0,021                  |
| NCI_ErbB4_signaling_events_Pathway_(axon_guidance)                                                 | 0,027                      | -0,062                | 0,011                | 5                     | 0,019                  |
| NCI_ErbB4_signaling_events_Pathway_(cell_proliferation)                                            | 0,021                      | -0,048                | 0,008                | 6                     | 0,015                  |
| NCI_ErbB4_signaling_events_Pathway_(chemotaxis)                                                    | 0,018                      | -0,023                | 0,024                | 10                    | 0,021                  |
| NCI_ErbB4_signaling_events_Pathway_(dendrite_morphogenesis)                                        | 0,018                      | -0,023                | 0,024                | 10                    | 0,021                  |
| NCI_ErbB4_signaling_events_Pathway_(epithelial_cell_differentiation)                               | -0,007                     | -0,047                | 0,010                | 14                    | 0,002                  |
| NCI_ErbB4_signaling_events_Pathway_(glial_cell_differentiation)                                    | -0,008                     | -0,086                | 0,032                | 10                    | 0,012                  |
| NCI_ErbB4_signaling_events_Pathway_(heart_development)                                             | 0,027                      | -0,062                | 0,011                | 5                     | 0,019                  |
| NCI_ErbB4_signaling_events_Pathway_(neural_crest_cell_migration)                                   | 0                          | 0                     | 0                    | 3                     | 0                      |
| NCI_Fanconi_anemia_Main_Pathway                                                                    | -0,036                     | 0,013                 | -0,009               | 45                    | -0,022                 |
| NCI_Fanconi_anemia_Pathway_(DNA_repair)                                                            | -0,007                     | -0,096                | -0,043               | 3                     | -0,025                 |
| NCI_Fanconi_anemia_Pathway_(G1_S_transition_checkpoint)                                            | -0,031                     | 0,032                 | -0,047               | 5                     | -0,039                 |
| NCI_Fanconi_anemia_Pathway_(regulation_of_double_strand_break_repair_via_homologous_recombination) | -0,034                     | 0,012                 | -0,014               | 37                    | -0,024                 |
| NCI_Fanconi_anemia_Pathway_(Sister_Chromatid_Exchange_Process)                                     | -0,050                     | 0,070                 | -0,018               | 30                    | -0,034                 |
| NCI_FAS_CD95_signaling_Main_Pathway                                                                | 0,017                      | -0,006                | 0,014                | 31                    | 0,015                  |
| NCI_FAS_CD95_signaling_Pathway_(cell_cycle)                                                        | 0,081                      | 0,085                 | 0,028                | 4                     | 0,054                  |
| NCI_FAS_CD95_signaling_Pathway_(cell_migration)                                                    | -0,026                     | -0,022                | 0,049                | 9                     | 0,012                  |
| NCI_FAS_CD95_signaling_Pathway_(necroptosis)                                                       | 0,066                      | -0,005                | 0,055                | 6                     | 0,060                  |
| NCI_FAS_CD95_signaling_Pathway_(neuron_projection_development)                                     | 0,067                      | -0,087                | 0,017                | 8                     | 0,042                  |
| NCI_FAS_CD95_signaling_Pathway_(release_of_cytochrome_c_from_mitochondria)                         | 0,081                      | -0,069                | 0,038                | 7                     | 0,059                  |
| NCI_Fc_epsilon_receptor_1_signaling_in_mast_cells_Main_Pathway                                     | -0,035                     | 0,090                 | -0,024               | 56                    | -0,030                 |
| NCI_Fc_epsilon_receptor_1_signaling_in_mast_cells_Pathway_(regulation_of_mast_cell_degranulation)  | -0,023                     | 0,052                 | -0,050               | 10                    | -0,037                 |
| NCI_FGF_signaling_Main_Pathway                                                                     | -0,019                     | 0,059                 | -0,027               | 18                    | -0,023                 |
| NCI_FGF_signaling_Pathway_(cell_migration)                                                         | -0,061                     | 0,253                 | -0,051               | 4                     | -0,056                 |
| NCI_FGF_signaling_Pathway_(MAPKKK_cascade)                                                         | 0,001                      | -0,049                | 0,002                | 8                     | 0,001                  |
| NCI_FGF_signaling_Pathway_(negative_regulation_of_apoptosis)                                       | 0,011                      | -0,016                | -0,021               | 5                     | -0,005                 |
| NCI_FOXA1_transcription_factor_network_Main_Pathway                                                | 0                          | 0                     | 0                    | 12                    | 0                      |
| NCI_FOXA2_and_FOXA3_transcription_factor_networks_Main_Pathway                                     | 0,041                      | -0,140                | 0,045                | 24                    | 0,043                  |
| NCI_FOXM1_transcription_factor_network_Main_Pathway                                                | 0,030                      | -0,022                | 0,038                | 39                    | 0,034                  |
| NCI_FoxO_family_signaling_Main_Pathway                                                             | 0,022                      | -0,030                | -0,002               | 40                    | 0,010                  |
| NCI_Glucocorticoid_receptor_regulatory_network_Main_Pathway                                        | -0,031                     | 0,026                 | 0,006                | 64                    | -0,013                 |
| NCI_Glucocorticoid_receptor_regulatory_network_Pathway_(apoptosis)                                 | -0,060                     | 0,038                 | 0,029                | 19                    | -0,016                 |
| NCI_Glucocorticoid_receptor_regulatory_network_Pathway_(histone_acetylation)                       | -0,060                     | 0,038                 | 0,029                | 19                    | -0,016                 |
| NCI_Glucocorticoid_receptor_regulatory_network_Pathway_(MAPKKK_cascade)                            | -0,060                     | 0,038                 | 0,029                | 19                    | -0,016                 |
| NCI_Glypican_1_network_Main_Pathway                                                                | -0,003                     | -0,011                | -0,016               | 18                    | -0,010                 |
| NCI_Glypican_1_network_Pathway_(BMP_signaling_pathway)                                             | -0,017                     | -0,020                | -0,036               | 9                     | -0,027                 |
| NCI_Glypican_1_network_Pathway_(cell_growth)                                                       | -0,014                     | -0,017                | -0,030               | 11                    | -0,022                 |
| NCI_Glypican_1_network_Pathway_(fibroblast_growth_factor_receptor_signaling_pathway)               | -0,014                     | -0,017                | -0,030               | 11                    | -0,022                 |
| NCI_Glypican_2_network_Main_Pathway                                                                | 0                          | 0                     | 0                    | 2                     | 0                      |
| NCI_Glypican_3_network_Main_Pathway                                                                | 0,045                      | -0,003                | -0,016               | 6                     | 0,014                  |
| NCI_Glypican_3_network_Pathway_(apoptosis)                                                         | 0,067                      | -0,004                | -0,024               | 4                     | 0,021                  |
| NCI_Glypican_3_network_Pathway_(embryonic_digit_morphogenesis)                                     | 0                          | 0                     | 0                    | 2                     | 0                      |

| Pathway                                                                                                                         | Tumour_MDA_MB.231_Invasive | Tumour_AU565_Invasive | Tumour_T47D_Invasive | Number of genes in PW | Mean (MDA_MB.231_T47D) |
|---------------------------------------------------------------------------------------------------------------------------------|----------------------------|-----------------------|----------------------|-----------------------|------------------------|
| NCI_Glypican_3_network_Pathway_(kidney_development)                                                                             | 0                          | 0                     | 0                    | 2                     | 0                      |
| NCI_Glypican_3_network_Pathway_(skeletal_system_development)                                                                    | 0                          | 0                     | 0                    | 2                     | 0                      |
| NCI_GMCSF_mediated_signaling_events_Main_Pathway                                                                                | -0,009                     | -0,072                | 0,041                | 8                     | 0,016                  |
| NCI_Hedgehog_signaling_events_mediated_by_Gli_proteins_Main_Pathway                                                             | 0,062                      | -0,164                | 0,023                | 13                    | 0,042                  |
| NCI_Hedgehog_signaling_events_mediated_by_Gli_proteins_Pathway_(embryonic_limb_morphogenesis)                                   | 0,102                      | -0,226                | 0,025                | 7                     | 0,063                  |
| NCI_Hedgehog_signaling_events_mediated_by_Gli_proteins_Pathway_(forebrain_development)                                          | 0,102                      | -0,226                | 0,025                | 7                     | 0,063                  |
| NCI_HIF_1_alpha_transcription_factor_network_Main_Pathway                                                                       | 0,020                      | -0,181                | 0,079                | 59                    | 0,050                  |
| NCI_HIF_2_alpha_transcription_factor_network_Main_Pathway                                                                       | 0,057                      | -0,087                | 0,039                | 29                    | 0,048                  |
| NCI_HIF_2_alpha_transcription_factor_network_Pathway_(neuron_apoptosis)                                                         | 0,010                      | -0,119                | 0,072                | 3                     | 0,041                  |
| NCI_HIV_1_Nef_Negative_effector_of_Fas_and_TNF_alpha_Main_Pathway                                                               | 0,004                      | 0,031                 | 0,005                | 30                    | 0,004                  |
| NCI_HIV_1_Nef_Negative_effector_of_Fas_and_TNF_alpha_Pathway_(Pathway_degradation_of_CASP3_CASP7_CASP6)                         | 0,016                      | 0,026                 | -0,019               | 14                    | -0,001                 |
| NCI_HIV_1_Nef_Negative_effector_of_Fas_and_TNF_alpha_Pathway_(protein_ubiquitination)                                           | -0,036                     | 0,096                 | 0,011                | 13                    | -0,012                 |
| NCI_Hypoxic_and_oxygen_homeostasis_regulation_of_HIF_1_alpha_Main_Pathway                                                       | 0,019                      | -0,084                | 0,018                | 19                    | 0,018                  |
| NCI_IFN_gamma_Main_Pathway                                                                                                      | 0,031                      | -0,074                | 0,017                | 35                    | 0,024                  |
| NCI_IFN_gamma_Pathway_(Antibacterial_Response)                                                                                  | 0,047                      | -0,135                | 0,012                | 15                    | 0,029                  |
| NCI_IFN_gamma_Pathway_(antigen_processing_and_presentation_of_peptide_antigen_via_MHC_class_I)                                  | 0,047                      | -0,135                | 0,012                | 15                    | 0,029                  |
| NCI_IFN_gamma_Pathway_(antigen_processing_and_presentation_of_peptide_antigen_via_MHC_class_II)                                 | 0,047                      | -0,135                | 0,012                | 15                    | 0,029                  |
| NCI_IFN_gamma_Pathway_(Antiviral_Response)                                                                                      | 0,047                      | -0,135                | 0,012                | 15                    | 0,029                  |
| NCI_IFN_gamma_Pathway_(apoptosis)                                                                                               | 0,047                      | -0,135                | 0,012                | 15                    | 0,029                  |
| NCI_IFN_gamma_Pathway_(Immunoregulation)                                                                                        | 0,047                      | -0,135                | 0,012                | 15                    | 0,029                  |
| NCI_IFN_gamma_Pathway_(negative_regulation_of_cell_growth)                                                                      | 0,047                      | -0,135                | 0,012                | 15                    | 0,029                  |
| NCI_IGF1_Main_Pathway                                                                                                           | -0,182                     | -0,016                | 0,010                | 28                    | -0,086                 |
| NCI_IGF1_Pathway_(positive_regulation_of_MAPKKK_cascade)                                                                        | 0,040                      | -0,055                | 0,007                | 10                    | 0,024                  |
| NCI_IL1_mediated_signaling_events_Main_Pathway                                                                                  | -0,001                     | 0,030                 | -0,009               | 26                    | -0,005                 |
| NCI_IL12_mediated_signaling_events_Main_Pathway                                                                                 | 0,038                      | -0,129                | 0,039                | 41                    | 0,038                  |
| NCI_IL12_signaling_mediated_by_STAT4_Main_Pathway                                                                               | -0,020                     | -0,067                | 0,135                | 10                    | 0,058                  |
| NCI_IL12_signaling_mediated_by_STAT4_Pathway_(natural_killer_cell_mediated_cytotoxicity)                                        | -0,155                     | -0,192                | 0,384                | 1                     | 0,114                  |
| NCI_IL12_signaling_mediated_by_STAT4_Pathway_(T_helper_1_cell_differentiation)                                                  | -0,155                     | -0,192                | 0,384                | 1                     | 0,114                  |
| NCI_IL12_signaling_mediated_by_STAT4_Pathway_(T_helper_2_cell_differentiation)                                                  | -0,155                     | -0,192                | 0,384                | 1                     | 0,114                  |
| NCI_IL2_mediated_signaling_events_Main_Pathway                                                                                  | -0,009                     | 0,024                 | -0,006               | 48                    | -0,007                 |
| NCI_IL2_mediated_signaling_events_Pathway_(G1_S_transition_of_mitotic_cell_cycle)                                               | 0,041                      | 0,071                 | -0,036               | 5                     | 0,003                  |
| NCI_IL2_mediated_signaling_events_Pathway_(natural_killer_cell_mediated_cytotoxicity)                                           | -0,013                     | -0,000                | -0,010               | 19                    | -0,012                 |
| NCI_IL2_mediated_signaling_events_Pathway_(positive_regulation_of_cell_cell_adhesion)                                           | -0,055                     | 0,037                 | -0,020               | 13                    | -0,038                 |
| NCI_IL2_mediated_signaling_events_Pathway_(T_cell_proliferation)                                                                | -0,048                     | 0,032                 | -0,018               | 15                    | -0,033                 |
| NCI_IL2_signaling_events_mediated_by_PI3K_Main_Pathway                                                                          | -0,156                     | 0,025                 | 0,000                | 32                    | -0,078                 |
| NCI_IL2_signaling_events_mediated_by_PI3K_Pathway_(actin_cytoskeleton_organization)                                             | -0,019                     | -0,012                | -0,013               | 15                    | -0,016                 |
| NCI_IL2_signaling_events_mediated_by_PI3K_Pathway_(cell_proliferation)                                                          | -0,008                     | 0,038                 | -0,019               | 17                    | -0,013                 |
| NCI_IL2_signaling_events_mediated_by_PI3K_Pathway_(cell_survival)                                                               | -0,035                     | 0,001                 | -0,013               | 18                    | -0,024                 |
| NCI_IL2_signaling_events_mediated_by_PI3K_Pathway_(T_cell_proliferation)                                                        | -0,019                     | -0,012                | -0,013               | 15                    | -0,016                 |
| NCI_IL2_signaling_events_mediated_by_STAT5_Main_Pathway                                                                         | -0,009                     | -0,072                | 0,041                | 8                     | 0,016                  |
| NCI_IL2_signaling_events_mediated_by_STAT5_Pathway_(activation_induced_cell_death_of_T_cells)                                   | -0,009                     | -0,072                | 0,041                | 2                     | 0,016                  |
| NCI_IL2_signaling_events_mediated_by_STAT5_Pathway_(CD4_positive_CD25_positive_alpha_beta_regulatory_T_cell_lineage_commitment) | -0,009                     | -0,072                | 0,041                | 2                     | 0,016                  |
| NCI_IL23_mediated_signaling_events_Main_Pathway                                                                                 | 0,033                      | -0,119                | 0,056                | 33                    | 0,045                  |
| NCI_IL23_mediated_signaling_events_Pathway_(keratinocyte_proliferation)                                                         | 0                          | 0                     | 0                    | 6                     | 0                      |
| NCI_IL23_mediated_signaling_events_Pathway_(positive_regulation_of_chronic_inflammatory_response)                               | 0                          | 0                     | 0                    | 6                     | 0                      |
| NCI_IL23_mediated_signaling_events_Pathway_(positive_regulation_of_dendritic_cell_antigen_processing_and_presentation)          | 0                          | 0                     | 0                    | 2                     | 0                      |

| Pathway                                                                                               | Tumour_MDA_MB.231_Invasive | Tumour_AU565_Invasive | Tumour_T47D_Invasive | Number of genes in PW | Mean (MDA_MB.231_T47D) |
|-------------------------------------------------------------------------------------------------------|----------------------------|-----------------------|----------------------|-----------------------|------------------------|
| NCI_IL23_mediated_signaling_events_Pathway_(positive_regulation_of_humoral_immune_response)           | 0                          | 0                     | 0                    | 6                     | 0                      |
| NCI_IL23_mediated_signaling_events_Pathway_(positive_regulation_of_T_cell_mediated_cytotoxicity)      | 0                          | 0                     | 0                    | 6                     | 0                      |
| NCI_IL23_mediated_signaling_events_Pathway_(T_cell_proliferation)                                     | 0                          | 0                     | 0                    | 6                     | 0                      |
| NCI_IL27_mediated_signaling_events_Main_Pathway                                                       | 0,044                      | -0,250                | 0,047                | 20                    | 0,045                  |
| NCI_IL27_mediated_signaling_events_Pathway_(cytokine_production_during_immune_response)               | 0                          | 0                     | 0                    | 6                     | 0                      |
| NCI_IL27_mediated_signaling_events_Pathway_(MAPKKK_cascade)                                           | 0                          | 0                     | 0                    | 6                     | 0                      |
| NCI_IL27_mediated_signaling_events_Pathway_(mast_cell_activation)                                     | 0                          | 0                     | 0                    | 6                     | 0                      |
| NCI_IL27_mediated_signaling_events_Pathway_(positive_regulation_of_mast_cell_cytokine_production)     | 0,010                      | -0,091                | 0,024                | 7                     | 0,017                  |
| NCI_IL27_mediated_signaling_events_Pathway_(positive_regulation_of_T_cell_mediated_cytotoxicity)      | 0                          | 0                     | 0                    | 6                     | 0                      |
| NCI_IL27_mediated_signaling_events_Pathway_(T_cell_proliferation)                                     | 0                          | 0                     | 0                    | 6                     | 0                      |
| NCI_IL27_mediated_signaling_events_Pathway_(T_cell_proliferation_during_immune_response)              | 0                          | 0                     | 0                    | 6                     | 0                      |
| NCI_IL27_mediated_signaling_events_Pathway_(T_helper_2_cell_differentiation)                          | 0                          | 0                     | 0                    | 6                     | 0                      |
| NCI_IL3_mediated_signaling_events_Main_Pathway                                                        | 0,004                      | -0,008                | 0,009                | 18                    | 0,007                  |
| NCI_IL4_mediated_signaling_events_Main_Pathway                                                        | 0,001                      | -0,094                | 0,005                | 37                    | 0,003                  |
| NCI_IL4_mediated_signaling_events_Pathway_(T_cell_proliferation)                                      | 0,355                      | -1,319                | 0,434                | 1                     | 0,395                  |
| NCI_IL4_mediated_signaling_events_Pathway_(T_helper_1_cell_differentiation)                           | 0,355                      | -1,319                | 0,434                | 1                     | 0,395                  |
| NCI_IL4_mediated_signaling_events_Pathway_(T_helper_2_cell_differentiation)                           | 0,355                      | -1,319                | 0,434                | 1                     | 0,395                  |
| NCI_IL5_mediated_signaling_events_Main_Pathway                                                        | -0,005                     | -0,006                | 0,024                | 11                    | 0,009                  |
| NCI_IL5_mediated_signaling_events_Pathway_(proteasomal_ubiquitin_dependent_protein_catabolic_process) | 0                          | 0                     | 0                    | 4                     | 0                      |
| NCI_IL5_mediated_signaling_events_Pathway_(regulation_of_isotype_switching_to_igG_isotypes)           | -0,003                     | -0,024                | 0,014                | 6                     | 0,005                  |
| NCI_IL6_mediated_signaling_events_Main_Pathway                                                        | 0,015                      | -0,121                | 0,032                | 38                    | 0,024                  |
| NCI_IL6_mediated_signaling_events_Pathway_(cell_cycle_arrest)                                         | 0,176                      | -0,819                | 0,275                | 9                     | 0,225                  |
| NCI_IL6_mediated_signaling_events_Pathway_(cell_survival)                                             | 0,176                      | -0,819                | 0,275                | 9                     | 0,225                  |
| NCI_IL6_mediated_signaling_events_Pathway_(macrophage_differentiation)                                | 0,176                      | -0,819                | 0,275                | 9                     | 0,225                  |
| NCI_IL6_mediated_signaling_events_Pathway_(MAPKKK_cascade)                                            | -0,043                     | 0,044                 | 0,019                | 7                     | -0,012                 |
| NCI_IL8_and_CXCR1_mediated_signaling_events_Main_Pathway                                              | -0,024                     | 0,115                 | 0,016                | 25                    | -0,004                 |
| NCI_IL8_and_CXCR1_mediated_signaling_events_Pathway_(basophil_degranulation)                          | -0,001                     | -0,080                | 0,016                | 5                     | 0,008                  |
| NCI_IL8_and_CXCR1_mediated_signaling_events_Pathway_(cAMP_biosynthetic_process)                       | -0,057                     | -0,128                | 0,032                | 10                    | -0,012                 |
| NCI_IL8_and_CXCR1_mediated_signaling_events_Pathway_(chemotaxis)                                      | 0,030                      | -0,078                | 0,035                | 6                     | 0,032                  |
| NCI_IL8_and_CXCR2_mediated_signaling_events_Main_Pathway                                              | -0,040                     | 0,127                 | 0,012                | 28                    | -0,014                 |
| NCI_IL8_and_CXCR2_mediated_signaling_events_Pathway_(cAMP_biosynthetic_process)                       | -0,075                     | -0,034                | 0,009                | 14                    | -0,033                 |
| NCI_IL8_and_CXCR2_mediated_signaling_events_Pathway_(Pathway_degradation_of_CXCL8)                    | -0,069                     | -0,039                | 0,012                | 16                    | -0,028                 |
| NCI_IL8_and_CXCR2_mediated_signaling_events_Pathway_(regulation_of_cell_migration)                    | 0,025                      | -0,098                | 0,057                | 6                     | 0,041                  |
| NCI_Insulin_mediated_glucose_transport_Main_Pathway                                                   | 0,042                      | -0,135                | 0,028                | 19                    | 0,035                  |
| NCI_Insulin_Pathway_Main_Pathway                                                                      | -0,158                     | -0,008                | 0,045                | 44                    | -0,056                 |
| NCI_Insulin_Pathway_Pathway_(negative_regulation_of_MAPKKK_cascade)                                   | -0,118                     | 0,111                 | -0,021               | 9                     | -0,069                 |
| NCI_Integrin_linked_kinase_signaling_Main_Pathway                                                     | 0,031                      | -0,016                | 0,008                | 43                    | 0,019                  |
| NCI_Integrin_linked_kinase_signaling_Pathway_(anoikis)                                                | 0,087                      | -0,038                | 0,050                | 10                    | 0,069                  |
| NCI_Integrin_linked_kinase_signaling_Pathway_(apoptosis)                                              | 0,087                      | -0,038                | 0,050                | 10                    | 0,069                  |
| NCI_Integrin_linked_kinase_signaling_Pathway_(centrosome_localization)                                | 0,051                      | -0,062                | 0,004                | 16                    | 0,027                  |
| NCI_Integrin_linked_kinase_signaling_Pathway_(DNA_biosynthetic_process)                               | 0,031                      | -0,019                | 0,001                | 13                    | 0,016                  |
| NCI_Integrin_linked_kinase_signaling_Pathway_(microtubule_cytoskeleton_organization)                  | 0,060                      | -0,038                | 0,005                | 3                     | 0,033                  |
| NCI_Integrin_linked_kinase_signaling_Pathway_(substrate_adhesion_dependent_cell_spreading)            | -0,046                     | 0,107                 | -0,029               | 8                     | -0,037                 |
| NCI_Integrins_in_angiogenesis_Main_Pathway                                                            | -0,055                     | -0,043                | 0,021                | 63                    | -0,017                 |
| NCI_Integrins_in_angiogenesis_Pathway_(angiogenesis)                                                  | -0,003                     | -0,011                | 0,006                | 19                    | 0,001                  |
| NCI_Internalization_of_ErbB1_Main_Pathway                                                             | -0,005                     | -0,027                | 0,016                | 38                    | 0,005                  |
| NCI_JNK_signaling_in_the_CD4_TCR_Main_Pathway                                                         | 0,023                      | -0,086                | 0,054                | 14                    | 0,039                  |
| NCI_Lissencephaly_gene_LIS1_in_neuronal_migration_and_development_Main_Pathway                        | 0,016                      | -0,046                | -0,010               | 19                    | 0,003                  |

| Pathway                                                                                                         | Tumour_MDA_MB.231_Invasive | Tumour_AU565_Invasive | Tumour_T47D_Invasive | Number of genes in PW | Mean (MDA_MB.231_T47D) |
|-----------------------------------------------------------------------------------------------------------------|----------------------------|-----------------------|----------------------|-----------------------|------------------------|
| NCI_Lissencephaly_gene_LIS1_in_neuronal_migration_and_development_Pathway_(anaphase)                            | 0,046                      | -0,242                | 0,054                | 2                     | 0,050                  |
| NCI_Lissencephaly_gene_LIS1_in_neuronal_migration_and_development_Pathway_(microtubule_based_movement)          | -0,073                     | 0,079                 | -0,035               | 3                     | -0,054                 |
| NCI_LKB1_signaling_events_Main_Pathway                                                                          | 0,013                      | -0,010                | -0,005               | 40                    | 0,004                  |
| NCI_LKB1_signaling_events_Pathway_(anoikis)                                                                     | -0,027                     | 0,016                 | -0,007               | 6                     | -0,017                 |
| NCI_LKB1_signaling_events_Pathway_(ATP_biosynthetic_process)                                                    | -0,017                     | 0,017                 | -0,018               | 5                     | -0,018                 |
| NCI_LKB1_signaling_events_Pathway_(ATP_metabolic_process)                                                       | -0,017                     | 0,017                 | -0,018               | 5                     | -0,018                 |
| NCI_LKB1_signaling_events_Pathway_(chromatin_remodeling)                                                        | 0                          | 0                     | 0                    | 2                     | 0                      |
| NCI_LKB1_signaling_events_Pathway_(establishment_of_cell_polarity)                                              | 0,004                      | -0,021                | -0,012               | 10                    | -0,004                 |
| NCI_LKB1_signaling_events_Pathway_(Pathway_degradation_of_CDC37)                                                | 0,008                      | -0,040                | -0,018               | 3                     | -0,005                 |
| NCI_LKB1_signaling_events_Pathway_(Pathway_positive_regulation_of_CREB_transcription_factor_activity_via_CRIC2) | 0,043                      | -0,044                | 0,013                | 15                    | 0,028                  |
| NCI_LKB1_signaling_events_Pathway_(tubulin_complex_assembly)                                                    | 0,022                      | -0,037                | 0,006                | 9                     | 0,014                  |
| NCI_LKB1_signaling_events_Pathway_(Wnt_receptor_signaling_pathway)                                              | -0,017                     | 0,017                 | -0,018               | 5                     | -0,018                 |
| NCI_LPA_receptor_mediated_events_Main_Pathway                                                                   | -0,014                     | 0,011                 | 0,031                | 60                    | 0,009                  |
| NCI_LPA_receptor_mediated_events_Pathway_(arachidonic_acid_secretion)                                           | -0,061                     | -0,025                | 0,009                | 9                     | -0,026                 |
| NCI_LPA_receptor_mediated_events_Pathway_(cAMP_biosynthetic_process)                                            | -0,026                     | -0,023                | 0,006                | 17                    | -0,010                 |
| NCI_LPA_receptor_mediated_events_Pathway_(contractile_ring_contraction_involved_in_cytokinesis)                 | -0,016                     | 0,028                 | -0,001               | 8                     | -0,009                 |
| NCI_LPA_receptor_mediated_events_Pathway_(MAPKKK_cascade)                                                       | -0,061                     | -0,025                | 0,009                | 9                     | -0,026                 |
| NCI_LPA_receptor_mediated_events_Pathway_(positive_regulation_of_dendritic_cell_cytokine_production)            | 0                          | 0                     | 0                    | 3                     | 0                      |
| NCI_LPA_receptor_mediated_events_Pathway_(positive_regulation_of_microtubule_depolymerization)                  | -0,014                     | 0,012                 | -0,011               | 3                     | -0,013                 |
| NCI_LPA_receptor_mediated_events_Pathway_(positive_regulation_of_mitosis)                                       | -0,061                     | -0,025                | 0,009                | 9                     | -0,026                 |
| NCI_LPA_receptor_mediated_events_Pathway_(stress_fiber_assembly)                                                | 0,029                      | -0,046                | 0,016                | 8                     | 0,023                  |
| NCI_LPA4_mediated_signaling_events_Main_Pathway                                                                 | 0                          | 0                     | 0                    | 9                     | 0                      |
| NCI_LPA4_mediated_signaling_events_Pathway_(cAMP_biosynthetic_process)                                          | 0                          | 0                     | 0                    | 9                     | 0                      |
| NCI_mTOR_signaling_Main_Pathway                                                                                 | -0,083                     | 0,026                 | 0,016                | 60                    | -0,034                 |
| NCI_mTOR_signaling_Pathway_(lipid_biosynthetic_process)                                                         | 0,009                      | 0,020                 | 0,029                | 12                    | 0,019                  |
| NCI_mTOR_signaling_Pathway_(Pathway_rRNA_transcription_via_RRN3)                                                | 0,005                      | 0,018                 | 0,025                | 14                    | 0,015                  |
| NCI_mTOR_signaling_Pathway_(regulation_of_actin_cytoskeleton_organization)                                      | -0,004                     | -0,008                | 0,074                | 9                     | 0,035                  |
| NCI_mTOR_signaling_Pathway_(regulation_of_protein_stability)                                                    | -0,004                     | -0,008                | 0,074                | 9                     | 0,035                  |
| NCI_mTOR_signaling_Pathway_(translational_initiation)                                                           | 0,018                      | 0,059                 | 0,009                | 13                    | 0,014                  |
| NCI_N_cadherin_signaling_events_Main_Pathway                                                                    | -0,014                     | -0,009                | 0,001                | 34                    | -0,007                 |
| NCI_N_cadherin_signaling_events_Pathway_(actin_filament_polymerization)                                         | 0,018                      | -0,013                | -0,010               | 11                    | 0,004                  |
| NCI_N_cadherin_signaling_events_Pathway_(adherens_junction_organization)                                        | -0,018                     | 0,089                 | -0,036               | 3                     | -0,027                 |
| NCI_N_cadherin_signaling_events_Pathway_(apoptosis)                                                             | 0,037                      | -0,134                | -0,006               | 7                     | 0,015                  |
| NCI_N_cadherin_signaling_events_Pathway_(axon_guidance)                                                         | 0,043                      | -0,156                | -0,007               | 6                     | 0,018                  |
| NCI_N_cadherin_signaling_events_Pathway_(axonogenesis)                                                          | 0                          | 0                     | 0                    | 4                     | 0                      |
| NCI_N_cadherin_signaling_events_Pathway_(cardiac_muscle_tissue_morphogenesis)                                   | 0,043                      | -0,156                | -0,007               | 6                     | 0,018                  |
| NCI_N_cadherin_signaling_events_Pathway_(cortical_microtubule_organization)                                     | 0,043                      | -0,156                | -0,007               | 6                     | 0,018                  |
| NCI_N_cadherin_signaling_events_Pathway_(endothelial_cell_proliferation)                                        | 0,043                      | -0,156                | -0,007               | 6                     | 0,018                  |
| NCI_N_cadherin_signaling_events_Pathway_(gap_junction_assembly)                                                 | 0,030                      | -0,121                | -0,003               | 9                     | 0,013                  |
| NCI_N_cadherin_signaling_events_Pathway_(lamellipodium_assembly)                                                | 0,029                      | -0,117                | 0,012                | 9                     | 0,020                  |
| NCI_N_cadherin_signaling_events_Pathway_(long_term_synaptic_potentiation)                                       | 0,043                      | -0,156                | -0,007               | 6                     | 0,018                  |
| NCI_N_cadherin_signaling_events_Pathway_(myoblast_differentiation)                                              | 0,001                      | -0,097                | -0,012               | 10                    | -0,006                 |
| NCI_N_cadherin_signaling_events_Pathway_(osteoblast_differentiation)                                            | 0,003                      | -0,097                | 0,029                | 6                     | 0,016                  |
| NCI_N_cadherin_signaling_events_Pathway_(protein_transport_into_membrane_raft)                                  | 0,043                      | -0,156                | -0,007               | 6                     | 0,018                  |
| NCI_N_cadherin_signaling_events_Pathway_(regulation_of_cell_cell_adhesion)                                      | 0,018                      | -0,033                | -0,002               | 13                    | 0,008                  |
| NCI_N_cadherin_signaling_events_Pathway_(regulation_of_short_term_neuronal_synaptic_plasticity)                 | 0,043                      | -0,156                | -0,007               | 6                     | 0,018                  |
| NCI_N_cadherin_signaling_events_Pathway_(regulation_of_synapse_organization)                                    | 0,037                      | -0,134                | -0,006               | 7                     | 0,015                  |
| NCI_N_cadherin_signaling_events_Pathway_(regulation_of_synaptic_plasticity)                                     | 0,043                      | -0,156                | -0,007               | 6                     | 0,018                  |
| NCI_N_cadherin_signaling_events_Pathway_(synaptic_vesicle_fusion_to_presynaptic_membrane)                       | 0,043                      | -0,156                | -0,007               | 6                     | 0,018                  |
| NCI_Nectin_adhesion_Main_Pathway                                                                                | 0,008                      | -0,031                | 0,022                | 30                    | 0,015                  |
| NCI_Nectin_adhesion_Pathway_(positive_regulation_of_JNK_cascade)                                                | 0,017                      | -0,172                | 0,042                | 5                     | 0,030                  |

| Pathway                                                                                           | Tumour_MDA_MB.231_Invasive | Tumour_AU565_Invasive | Tumour_T47D_Invasive | Number of genes in PW | Mean (MDA_MB.231_T47D) |
|---------------------------------------------------------------------------------------------------|----------------------------|-----------------------|----------------------|-----------------------|------------------------|
| NCI_Nectin_adhesion_Pathway_(positive_regulation_of_lamellipodium_assembly)                       | 0,031                      | -0,006                | -0,007               | 4                     | 0,012                  |
| NCI_Nephrin_Neph1_signaling_in_the_kidney_podocyte_Main_Pathway                                   | 0,011                      | -0,010                | 0,010                | 27                    | 0,010                  |
| NCI_Nephrin_Neph1_signaling_in_the_kidney_podocyte_Pathway_(apoptosis)                            | 0,029                      | 0,067                 | 0,008                | 5                     | 0,018                  |
| NCI_Nephrin_Neph1_signaling_in_the_kidney_podocyte_Pathway_(lamellipodium_assembly)               | 0,016                      | -0,038                | 0,019                | 8                     | 0,017                  |
| NCI_Netrin_mediated_signaling_events_Main_Pathway                                                 | 0,039                      | -0,069                | 0,009                | 23                    | 0,024                  |
| NCI_Netrin_mediated_signaling_events_Pathway_(apoptosis)                                          | 0                          | 0                     | 0                    | 4                     | 0                      |
| NCI_Netrin_mediated_signaling_events_Pathway_(axon_guidance)                                      | 0,124                      | -0,250                | -0,006               | 5                     | 0,059                  |
| NCI_Netrin_mediated_signaling_events_Pathway_(negative_chemotaxis)                                | 0,029                      | -0,070                | 0,020                | 9                     | 0,025                  |
| NCI_Neurotrophic_factor_mediated_Trk_receptor_signaling_Main_Pathway                              | -0,011                     | 0,002                 | 0,010                | 54                    | -0,001                 |
| NCI_Neurotrophic_factor_mediated_Trk_receptor_signaling_Pathway_(axon_guidance)                   | 0,023                      | 0,004                 | -0,003               | 9                     | 0,010                  |
| NCI_Neurotrophic_factor_mediated_Trk_receptor_signaling_Pathway_(MAPKKK_cascade)                  | -0,025                     | -0,133                | 0,058                | 10                    | 0,017                  |
| NCI_Neurotrophic_factor_mediated_Trk_receptor_signaling_Pathway_(neuron_projection_morphogenesis) | -0,026                     | 0,005                 | 0,010                | 23                    | -0,008                 |
| NCI_Neurotrophic_factor_mediated_Trk_receptor_signaling_Pathway_(Schwann_cell_development)        | -0,015                     | 0,035                 | 0,000                | 20                    | -0,007                 |
| NCI_Noncanonical_Wnt_signaling_Main_Pathway                                                       | 0,139                      | 0,027                 | 0,075                | 4                     | 0,107                  |
| NCI_Nongenotropic_Androgen_signaling_Main_Pathway                                                 | -0,010                     | -0,018                | 0,012                | 27                    | 0,001                  |
| NCI_Nongenotropic_Androgen_signaling_Pathway_(actin_cytoskeleton_reorganization)                  | -0,070                     | 0,146                 | -0,021               | 4                     | -0,046                 |
| NCI_Nongenotropic_Androgen_signaling_Pathway_(apoptosis)                                          | 0,004                      | -0,026                | 0,013                | 15                    | 0,008                  |
| NCI_Nongenotropic_Androgen_signaling_Pathway_(cAMP_biosynthetic_process)                          | -0,056                     | -0,049                | 0,012                | 8                     | -0,022                 |
| NCI_Nongenotropic_Androgen_signaling_Pathway_(cell_proliferation)                                 | -0,001                     | -0,043                | 0,012                | 18                    | 0,005                  |
| NCI_Notch_mediated_HES_HEY_network_Main_Pathway                                                   | -0,032                     | 0,012                 | 0,014                | 28                    | -0,009                 |
| NCI_Notch_mediated_HES_HEY_network_Pathway_(Pathway_degradation_of_HEY1)                          | 0                          | 0                     | 0                    | 5                     | 0                      |
| NCI_Notch_signaling_Main_Pathway                                                                  | -0,026                     | -0,033                | 0,007                | 47                    | -0,009                 |
| NCI_Notch_signaling_Pathway_(Bergmann_glia_cell_differentiation)                                  | -0,031                     | -0,059                | -0,000               | 26                    | -0,016                 |
| NCI_Notch_signaling_Pathway_(oligodendrocyte_development)                                         | -0,029                     | -0,055                | -0,000               | 28                    | -0,015                 |
| NCI_Notch_signaling_Pathway_(skeletal_muscle_tissue_development)                                  | -0,188                     | 0,062                 | -0,142               | 5                     | -0,165                 |
| NCI_Osteopontin_mediated_events_Main_Pathway                                                      | -0,015                     | 0,000                 | 0,048                | 30                    | 0,017                  |
| NCI_Osteopontin_mediated_events_Pathway_(bone_resorption)                                         | -0,076                     | -0,057                | 0,072                | 11                    | -0,002                 |
| NCI_Osteopontin_mediated_events_Pathway_(ruffle_organization)                                     | -0,023                     | 0,232                 | -0,063               | 5                     | -0,043                 |
| NCI_p38_MAPK_signaling_Main_Pathway                                                               | -0,006                     | 0,049                 | -0,002               | 27                    | -0,004                 |
| NCI_p38_signaling_mediated_by_MAPKAP_kinases_Main_Pathway                                         | 0,063                      | -0,063                | 0,029                | 21                    | 0,046                  |
| NCI_p38_signaling_mediated_by_MAPKAP_kinases_Pathway_(actin_cytoskeleton_reorganization)          | 0,083                      | -0,190                | 0,070                | 5                     | 0,077                  |
| NCI_p38_signaling_mediated_by_MAPKAP_kinases_Pathway_(chemotaxis)                                 | -0,013                     | -0,007                | 0,007                | 4                     | -0,003                 |
| NCI_p38_signaling_mediated_by_MAPKAP_kinases_Pathway_(regulation_of_mRNA_stability)               | -0,017                     | -0,009                | 0,010                | 3                     | -0,004                 |
| NCI_p53_Main_Pathway                                                                              | -0,104                     | 0,095                 | -0,110               | 44                    | -0,107                 |
| NCI_p53_Pathway_(apoptosis)                                                                       | 0,014                      | -0,029                | 0,014                | 40                    | 0,014                  |
| NCI_p53_Pathway_(proteasomal_ubiquitin_dependent_protein_catabolic_process)                       | -0,044                     | 0,013                 | 0,038                | 4                     | -0,003                 |
| NCI_p73_transcription_factor_network_Main_Pathway                                                 | -0,013                     | -0,002                | 0,014                | 76                    | 0,001                  |
| NCI_p73_transcription_factor_network_Pathway_(apoptosis)                                          | -0,004                     | -0,043                | 0,007                | 22                    | 0,001                  |
| NCI_p75_NTR_mediated_signaling_Main_Pathway                                                       | -0,021                     | -0,021                | 0,012                | 60                    | -0,004                 |
| NCI_p75_NTR_mediated_signaling_Pathway_(activation_of_caspase_activity)                           | -0,050                     | 0,147                 | 0,025                | 7                     | -0,013                 |
| NCI_p75_NTR_mediated_signaling_Pathway_(cell_cycle_arrest)                                        | -0,028                     | 0,081                 | 0,022                | 9                     | -0,003                 |
| NCI_p75_NTR_mediated_signaling_Pathway_(neuron_apoptosis)                                         | -0,006                     | -0,037                | 0,040                | 24                    | 0,017                  |
| NCI_p75_NTR_mediated_signaling_Pathway_(neuron_projection_morphogenesis)                          | -0,025                     | 0,055                 | 0,009                | 17                    | -0,008                 |
| NCI_PAR1_mediated_thrombin_signaling_events_Main_Pathway                                          | -0,031                     | -0,035                | 0,020                | 43                    | -0,005                 |
| NCI_PAR1_mediated_thrombin_signaling_events_Pathway_(cAMP_biosynthetic_process)                   | -0,046                     | -0,096                | 0,034                | 21                    | -0,006                 |
| NCI_PAR1_mediated_thrombin_signaling_events_Pathway_(chemotaxis)                                  | -0,062                     | 0,140                 | -0,036               | 4                     | -0,049                 |
| NCI_PAR1_mediated_thrombin_signaling_events_Pathway_(focal_adhesion_assembly)                     | -0,012                     | 0,048                 | 0,001                | 7                     | -0,005                 |
| NCI_PAR1_mediated_thrombin_signaling_events_Pathway_(MAPKKK_cascade)                              | -0,011                     | -0,057                | 0,022                | 13                    | 0,005                  |



| Pathway                                                                                                  | Tumour_MDA_MB.231_Invasive | Tumour_AU565_Invasive | Tumour_T47D_Invasive | Number of genes in PW | Mean (MDA_MB.231_T47D) |
|----------------------------------------------------------------------------------------------------------|----------------------------|-----------------------|----------------------|-----------------------|------------------------|
| NCI_PAR1_mediated_thrombin_signaling_events_Pathway_(platelet_aggregation)                               | -0,023                     | -0,011                | 0,008                | 17                    | -0,008                 |
| NCI_PAR1_mediated_thrombin_signaling_events_Pathway_(positive_regulation_of_stress_fiber_assembly)       | -0,020                     | 0,073                 | -0,001               | 12                    | -0,011                 |
| NCI_PAR1_mediated_thrombin_signaling_events_Pathway_(Regulation_of_Cell_Shape)                           | -0,062                     | 0,140                 | -0,036               | 4                     | -0,049                 |
| NCI_PAR1_mediated_thrombin_signaling_events_Pathway_(regulation_of_vascular_permeability)                | 0,017                      | 0,019                 | 0,021                | 12                    | 0,019                  |
| NCI_PAR4_mediated_thrombin_signaling_events_Main_Pathway                                                 | -0,044                     | 0,019                 | -0,009               | 15                    | -0,027                 |
| NCI_PAR4_mediated_thrombin_signaling_events_Pathway_(platelet_aggregation)                               | -0,062                     | 0,140                 | -0,036               | 4                     | -0,049                 |
| NCI_PAR4_mediated_thrombin_signaling_events_Pathway_(Regulation_of_Cell_Shape)                           | -0,062                     | 0,140                 | -0,036               | 4                     | -0,049                 |
| NCI_PDGFR_receptor_signaling_network_Main_Pathway                                                        | 0                          | 0                     | 0                    | 6                     | 0                      |
| NCI_PDGFR_receptor_signaling_network_Pathway_(platelet_derived_growth_factor_receptor_signaling_pathway) | 0                          | 0                     | 0                    | 6                     | 0                      |
| NCI_PDGFR_alpha_signaling_Main_Pathway                                                                   | 0,019                      | -0,177                | 0,072                | 20                    | 0,046                  |
| NCI_PDGFR_alpha_signaling_Pathway_(JAK_STAT_cascade)                                                     | 0,047                      | -0,947                | 0,212                | 3                     | 0,130                  |
| NCI_PDGFR_alpha_signaling_Pathway_(positive_regulation_of_JUN_kinase_activity)                           | -0,073                     | -0,271                | 0,119                | 5                     | 0,023                  |
| NCI_PDGFR_alpha_signaling_Pathway_(Ras_protein_signal_transduction)                                      | -0,073                     | -0,271                | 0,119                | 5                     | 0,023                  |
| NCI_PDGFR_beta_signaling_Main_Pathway                                                                    | 0,013                      | -0,032                | 0,028                | 122                   | 0,021                  |
| NCI_PDGFR_beta_signaling_Pathway_(actin_cytoskeleton_organization)                                       | 0,048                      | -0,151                | 0,016                | 5                     | 0,032                  |
| NCI_PDGFR_beta_signaling_Pathway_(cell_migration)                                                        | -0,088                     | 0,422                 | -0,019               | 15                    | -0,054                 |
| NCI_PDGFR_beta_signaling_Pathway_(chemotaxis)                                                            | -0,034                     | 0,290                 | 0,007                | 19                    | -0,014                 |
| NCI_PDGFR_beta_signaling_Pathway_(focal_adhesion_assembly)                                               | 0,007                      | -0,134                | 0,053                | 6                     | 0,030                  |
| NCI_PDGFR_beta_signaling_Pathway_(receptor_recycling)                                                    | -0,008                     | 0,054                 | 0,030                | 13                    | 0,011                  |
| NCI_PDGFR_beta_signaling_Pathway_(ruffle_organization)                                                   | 0,018                      | -0,088                | 0,035                | 29                    | 0,027                  |
| NCI_Plasma_membrane_estrogen_receptor_signaling_Main_Pathway                                             | -0,013                     | -0,021                | 0,015                | 36                    | 0,001                  |
| NCI_Plasma_membrane_estrogen_receptor_signaling_Pathway_(apoptosis)                                      | 0,047                      | -0,141                | 0,067                | 7                     | 0,057                  |
| NCI_Plasma_membrane_estrogen_receptor_signaling_Pathway_(cAMP_biosynthetic_process)                      | -0,053                     | 0,011                 | -0,021               | 6                     | -0,037                 |
| NCI_Plasma_membrane_estrogen_receptor_signaling_Pathway_(cell_adhesion)                                  | -0,007                     | -0,086                | 0,035                | 16                    | 0,014                  |
| NCI_Plasma_membrane_estrogen_receptor_signaling_Pathway_(JNK_cascade)                                    | 0                          | 0                     | 0                    | 1                     | 0                      |
| NCI_Plasma_membrane_estrogen_receptor_signaling_Pathway_(MAPKKK_cascade)                                 | -0,012                     | 0,033                 | 0,007                | 2                     | -0,002                 |
| NCI_Plasma_membrane_estrogen_receptor_signaling_Pathway_(pseudopodium_formation)                         | 0,010                      | 0,008                 | -0,024               | 3                     | -0,007                 |
| NCI_Plasma_membrane_estrogen_receptor_signaling_Pathway_(regulation_of_stress_fiber_assembly)            | 0,010                      | 0,008                 | -0,024               | 3                     | -0,007                 |
| NCI_Plasma_membrane_estrogen_receptor_signaling_Pathway_(ruffle_organization)                            | 0,010                      | 0,008                 | -0,024               | 3                     | -0,007                 |
| NCI_Plasma_membrane_estrogen_receptor_signaling_Pathway_(vasodilation)                                   | -0,007                     | -0,086                | 0,035                | 16                    | 0,014                  |
| NCI_Plexin_D1_Signaling_Main_Pathway                                                                     | 0,020                      | -0,128                | 0,065                | 19                    | 0,042                  |
| NCI_Plexin_D1_Signaling_Pathway_(cell_adhesion_mediated_by_integrin)                                     | 0,025                      | -0,162                | 0,082                | 15                    | 0,054                  |
| NCI_Plexin_D1_Signaling_Pathway_(endothelial_cell_migration)                                             | -0,015                     | 0,171                 | -0,003               | 3                     | -0,009                 |
| NCI_Plexin_D1_Signaling_Pathway_(focal_adhesion_assembly)                                                | 0                          | 0                     | 0                    | 3                     | 0                      |
| NCI_Plexin_D1_Signaling_Pathway_(receptor_recycling)                                                     | 0,008                      | 0,111                 | 0,031                | 4                     | 0,020                  |
| NCI_Plexin_D1_Signaling_Pathway_(regulation_of_synapse_organization)                                     | 0                          | 0                     | 0                    | 3                     | 0                      |
| NCI_PLK1_signaling_events_Main_Pathway                                                                   | 0,016                      | -0,034                | -0,016               | 42                    | 0,000                  |
| NCI_PLK1_signaling_events_Pathway_(chromosome_segregation)                                               | 0,077                      | -0,192                | 0,004                | 2                     | 0,041                  |
| NCI_PLK1_signaling_events_Pathway_(cytokinesis)                                                          | 0,006                      | 0,042                 | -0,017               | 13                    | -0,005                 |
| NCI_PLK1_signaling_events_Pathway_(G2_M_transition_of_mitotic_cell_cycle)                                | 0,054                      | -0,023                | -0,021               | 5                     | 0,016                  |
| NCI_PLK1_signaling_events_Pathway_(Golgi_organization)                                                   | 0,032                      | 0,024                 | -0,013               | 14                    | 0,010                  |
| NCI_PLK1_signaling_events_Pathway_(metaphase_plate_congression)                                          | 0,033                      | 0,005                 | -0,007               | 11                    | 0,013                  |
| NCI_PLK1_signaling_events_Pathway_(microtubule_cytoskeleton_organization)                                | 0,028                      | 0,030                 | -0,013               | 12                    | 0,007                  |
| NCI_PLK1_signaling_events_Pathway_(positive_regulation_of_microtubule_depolymerization)                  | 0,019                      | 0,011                 | -0,008               | 12                    | 0,005                  |
| NCI_PLK1_signaling_events_Pathway_(proteasomal_ubiquitin_dependent_protein_catabolic_process)            | 0,054                      | -0,085                | 0,006                | 12                    | 0,030                  |
| NCI_PLK1_signaling_events_Pathway_(regulation_of_attachment_of_spindle_microtubules_to_kinetochore)      | 0,040                      | 0,003                 | -0,007               | 16                    | 0,017                  |
| NCI_PLK1_signaling_events_Pathway_(regulation_of centriole centriole cohesion)                           | 0,032                      | 0,002                 | -0,005               | 14                    | 0,013                  |

| Pathway                                                                                                       | Tumour_MDA_MB.231_Invasive | Tumour_AU565_Invasive | Tumour_T47D_Invasive | Number of genes in PW | Mean (MDA_MB.231_T47D) |
|---------------------------------------------------------------------------------------------------------------|----------------------------|-----------------------|----------------------|-----------------------|------------------------|
| NCI_PLK1_signaling_events_Pathway_(regulation_of_mitotic_centrosome_separation)                               | 0,032                      | 0,024                 | -0,013               | 14                    | 0,010                  |
| NCI_PLK1_signaling_events_Pathway_(spindle_assembly)                                                          | 0,028                      | 0,021                 | -0,011               | 16                    | 0,008                  |
| NCI_PLK1_signaling_events_Pathway_(spindle_elongation)                                                        | 0,032                      | 0,024                 | -0,013               | 14                    | 0,010                  |
| NCI_PLK1_signaling_events_Pathway_(spindle_stabilization)                                                     | 0,012                      | 0,020                 | -0,014               | 12                    | -0,001                 |
| NCI_PLK2_and_PLK4_events_Main_Pathway                                                                         | 0                          | 0                     | 0                    | 2                     | 0                      |
| NCI_PLK2_and_PLK4_events_Pathway_(regulation_of_centriole_replication)                                        | 0                          | 0                     | 0                    | 2                     | 0                      |
| NCI_PLK3_signaling_events_Main_Pathway                                                                        | 0,031                      | -0,003                | -0,001               | 5                     | 0,015                  |
| NCI_Posttranslational_regulation_of_adherens_junction_stability_and_dissassembly_Main_Pathway                 | -0,018                     | -0,056                | 0,005                | 48                    | -0,007                 |
| NCI_Posttranslational_regulation_of_adherens_junction_stability_and_dissassembly_Pathway_(axonogenesis)       | -0,015                     | -0,132                | 0,017                | 26                    | 0,001                  |
| NCI_Presenilin_action_in_Notch_and_Wnt_signaling_Main_Pathway                                                 | 0,006                      | -0,014                | 0,014                | 41                    | 0,010                  |
| NCI_Presenilin_action_in_Notch_and_Wnt_signaling_Pathway_(apoptosis)                                          | 0,013                      | -0,013                | -0,005               | 15                    | 0,004                  |
| NCI_Presenilin_action_in_Notch_and_Wnt_signaling_Pathway_(Pathway_degradation_of_CTNNB1)                      | 0,003                      | -0,020                | 0,021                | 33                    | 0,012                  |
| NCI_Proteoglycan_syndecan_mediated_signaling_events_Main_Pathway                                              | -0,105                     | 0,112                 | -0,035               | 4                     | -0,070                 |
| NCI_RAC1_signaling_Main_Pathway                                                                               | 0,030                      | -0,080                | 0,035                | 54                    | 0,033                  |
| NCI_RAC1_signaling_Pathway_(actin_filament_depolymerization)                                                  | -0,065                     | 0,176                 | -0,007               | 3                     | -0,036                 |
| NCI_RAC1_signaling_Pathway_(actin_filament_polymerization)                                                    | 0,008                      | 0,148                 | 0,051                | 4                     | 0,030                  |
| NCI_RAC1_signaling_Pathway_(lamellipodium_assembly)                                                           | 0,030                      | -0,085                | 0,033                | 18                    | 0,031                  |
| NCI_RAC1_signaling_Pathway_(neuron_projection_development)                                                    | -0,060                     | 0,191                 | -0,018               | 4                     | -0,039                 |
| NCI_RAC1_signaling_Pathway_(Pathway_positive_regulation_of_NF_kappaB_transcription_factor_activity_via_RAC1)  | -0,133                     | 0,435                 | -0,026               | 3                     | -0,079                 |
| NCI_RAC1_signaling_Pathway_(positive_regulation_of_Wnt_receptor_signaling_pathway)                            | 0,017                      | 0,133                 | 0,048                | 4                     | 0,033                  |
| NCI_RAC1_signaling_Pathway_(regulation_of_cell_cycle)                                                         | -0,066                     | 0,132                 | -0,024               | 4                     | -0,045                 |
| NCI_Rapid_glucocorticoid_signaling_Main_Pathway                                                               | -0,080                     | 0,016                 | -0,031               | 4                     | -0,055                 |
| NCI_Rapid_glucocorticoid_signaling_Pathway_(glutamate_secretion)                                              | -0,080                     | 0,016                 | -0,031               | 4                     | -0,055                 |
| NCI_Ras_signaling_in_the_CD4_TCR_Main_Pathway                                                                 | -0,016                     | 0,151                 | 0,004                | 14                    | -0,006                 |
| NCI_Reelin_signaling_Main_Pathway                                                                             | 0,065                      | -0,158                | 0,048                | 22                    | 0,057                  |
| NCI_Reelin_signaling_Pathway_(long_term_memory)                                                               | -0,000                     | 0,021                 | 0,012                | 7                     | 0,006                  |
| NCI_Reelin_signaling_Pathway_(neuron_migration)                                                               | 0,005                      | 0,017                 | 0,010                | 8                     | 0,008                  |
| NCI_Regulation_of_Androgen_receptor_activity_Main_Pathway                                                     | 0,014                      | -0,005                | 0,005                | 30                    | 0,009                  |
| NCI_Regulation_of_Androgen_receptor_activity_Pathway_(cell_proliferation)                                     | 0,016                      | -0,005                | 0,006                | 26                    | 0,011                  |
| NCI_Regulation_of_Androgen_receptor_activity_Pathway_(Pathway_positive_regulation_of_transcription_via_GATA2) | 0                          | 0                     | 0                    | 1                     | 0                      |
| NCI_Regulation_of_CDC42_activity_Main_Pathway                                                                 | 0,003                      | 0,019                 | -0,005               | 30                    | -0,001                 |
| NCI_Regulation_of_cytoplasmic_and_nuclear_SMAD2_3_signaling_Main_Pathway                                      | 0,007                      | -0,059                | 0,015                | 18                    | 0,011                  |
| NCI_Regulation_of_nuclear_beta_catenin_signaling_and_target_gene_transcription_Main_Pathway                   | 0,020                      | -0,043                | 0,034                | 78                    | 0,027                  |
| NCI_Regulation_of_nuclear_SMAD2_3_signaling_Main_Pathway                                                      | -0,002                     | -0,056                | 0,029                | 63                    | 0,013                  |
| NCI_Regulation_of_nuclear_SMAD2_3_signaling_Pathway_(muscle_cell_differentiation)                             | -0,003                     | -0,081                | 0,045                | 42                    | 0,021                  |
| NCI_Regulation_of_nuclear_SMAD2_3_signaling_Pathway_(negative_regulation_of_cell_growth)                      | 0                          | 0                     | 0                    | 1                     | 0                      |
| NCI_Regulation_of_nuclear_SMAD2_3_signaling_Pathway_(Pathway_degradation_of_SMAD3)                            | -0,002                     | -0,091                | 0,052                | 38                    | 0,025                  |
| NCI_Regulation_of_p38_alpha_and_p38_beta_Main_Pathway                                                         | -0,043                     | 0,237                 | -0,016               | 26                    | -0,029                 |
| NCI_Regulation_of_p38_alpha_and_p38_beta_Pathway_(positive_regulation_of_innate_immune_response)              | -0,043                     | 0,237                 | -0,016               | 26                    | -0,029                 |
| NCI_Regulation_of_RAC1_activity_Main_Pathway                                                                  | -0,012                     | 0,027                 | -0,007               | 38                    | -0,009                 |
| NCI_Regulation_of_Ras_family_activation_Main_Pathway                                                          | 0,024                      | -0,017                | -0,005               | 32                    | 0,010                  |
| NCI_Regulation_of_retinoblastoma_protein_Main_Pathway                                                         | -0,014                     | 0,037                 | 0,012                | 52                    | -0,001                 |
| NCI_Regulation_of_retinoblastoma_protein_Pathway_(erythrocyte_differentiation)                                | -0,029                     | 0,044                 | 0,019                | 9                     | -0,005                 |
| NCI_Regulation_of_retinoblastoma_protein_Pathway_(histone_methylation)                                        | -0,023                     | 0,049                 | 0,026                | 6                     | 0,002                  |
| NCI_Regulation_of_retinoblastoma_protein_Pathway_(Pathway_rRNA_transcription_via_RB1)                         | 0,009                      | 0,013                 | 0,032                | 25                    | 0,021                  |
| NCI_Regulation_of_retinoblastoma_protein_Pathway_(proteasomal_ubiquitin_dependent_protein_catabolic_process)  | 0,015                      | 0,011                 | 0,034                | 19                    | 0,024                  |
| NCI_Regulation_of_RhoA_activity_Main_Pathway                                                                  | 0,007                      | -0,044                | 0,005                | 46                    | 0,006                  |
| NCI_Regulation_of_Telomerase_Main_Pathway                                                                     | -0,152                     | 0,059                 | -0,021               | 40                    | -0,087                 |

| Pathway                                                                                                                                                            | Tumour_MDA_MB.231_Invasive | Tumour_AU565_Invasive | Tumour_T47D_Invasive | Number of genes in PW | Mean (MDA_MB.231_T47D) |
|--------------------------------------------------------------------------------------------------------------------------------------------------------------------|----------------------------|-----------------------|----------------------|-----------------------|------------------------|
| NCI_Regulation_of_Telomerase_Pathway_(cell_cycle)                                                                                                                  | 0,034                      | -0,016                | -0,013               | 3                     | 0,010                  |
| NCI_Retinoic_acid_receptors_mediated_signaling_Main_Pathway                                                                                                        | -0,028                     | -0,004                | 0,006                | 29                    | -0,011                 |
| NCI_Retinoic_acid_receptors_mediated_signaling_Pathway_(proteasomal_ubiquitin_dependent_protein_catabolic_process)                                                 | -0,004                     | -0,023                | 0,007                | 19                    | 0,002                  |
| NCI_RhoA_signaling_Main_Pathway                                                                                                                                    | 0,027                      | -0,085                | 0,037                | 27                    | 0,032                  |
| NCI_RhoA_signaling_Pathway_(actin_cytoskeleton_organization)                                                                                                       | -0,004                     | -0,130                | 0,009                | 2                     | 0,002                  |
| NCI_RhoA_signaling_Pathway_(actin_filament_depolymerization)                                                                                                       | -0,019                     | 0,046                 | -0,005               | 5                     | -0,012                 |
| NCI_RhoA_signaling_Pathway_(Golgi_organization)                                                                                                                    | -0,098                     | 0,177                 | -0,053               | 2                     | -0,075                 |
| NCI_RhoA_signaling_Pathway_(Pathway_positive_regulation_of_NF_kappaB_transcription_factor_activity_via_RHOA)                                                       | -0,094                     | 0,196                 | -0,105               | 1                     | -0,099                 |
| NCI_Role_of_Calcineurin_dependent_NFAT_signaling_in_lymphocytes_Main_Pathway                                                                                       | 0,017                      | -0,022                | 0,006                | 49                    | 0,011                  |
| NCI_Role_of_Calcineurin_dependent_NFAT_signaling_in_lymphocytes_Pathway_(apoptosis)                                                                                | 0,040                      | -0,023                | -0,028               | 4                     | 0,006                  |
| NCI_Role_of_Calcineurin_dependent_NFAT_signaling_in_lymphocytes_Pathway_(positive_T_cell_selection)                                                                | -0,023                     | 0,057                 | 0,026                | 4                     | 0,001                  |
| NCI_RXR_and_RAR_heterodimerization_with_other_nuclear_receptor_Main_Pathway                                                                                        | -0,015                     | 0,011                 | -0,001               | 12                    | -0,008                 |
| NCI_S1P1_Main_Pathway                                                                                                                                              | -0,035                     | 0,011                 | -0,005               | 19                    | -0,020                 |
| NCI_S1P1_Pathway_(negative_regulation_of_cAMP_metabolic_process)                                                                                                   | -0,038                     | -0,087                | 0,030                | 6                     | -0,004                 |
| NCI_S1P1_Pathway_(negative_regulation_of_T_cell_proliferation)                                                                                                     | -0,038                     | -0,087                | 0,030                | 6                     | -0,004                 |
| NCI_S1P1_Pathway_(receptor_internalization)                                                                                                                        | -0,030                     | -0,032                | 0,023                | 11                    | -0,003                 |
| NCI_S1P2_Main_Pathway                                                                                                                                              | 0,003                      | -0,052                | 0,019                | 26                    | 0,011                  |
| NCI_S1P2_Pathway_(chemotaxis)                                                                                                                                      | 0,010                      | -0,023                | -0,014               | 8                     | -0,002                 |
| NCI_S1P2_Pathway_(regulation_of_vascular_permeability)                                                                                                             | -0,036                     | 0,038                 | -0,035               | 5                     | -0,036                 |
| NCI_S1P3_Main_Pathway                                                                                                                                              | -0,016                     | -0,065                | 0,007                | 23                    | -0,005                 |
| NCI_S1P3_Pathway_(Sinus_Bradycardia)                                                                                                                               | -0,038                     | -0,087                | 0,030                | 6                     | -0,004                 |
| NCI_S1P4_Main_Pathway                                                                                                                                              | -0,027                     | 0,000                 | -0,005               | 14                    | -0,016                 |
| NCI_S1P4_Pathway_(cell_migration)                                                                                                                                  | -0,036                     | -0,045                | 0,023                | 7                     | -0,006                 |
| NCI_S1P5_Main_Pathway                                                                                                                                              | -0,040                     | -0,041                | 0,010                | 8                     | -0,015                 |
| NCI_S1P5_Pathway_(negative_regulation_of_cAMP_metabolic_process)                                                                                                   | -0,038                     | -0,087                | 0,030                | 6                     | -0,004                 |
| NCI_S1P5_Pathway_(telencephalon_oligodendrocyte_cell_migration)                                                                                                    | -0,046                     | -0,047                | 0,011                | 7                     | -0,017                 |
| NCI_SHP2_signaling_Main_Pathway                                                                                                                                    | -0,034                     | -0,059                | 0,017                | 48                    | -0,009                 |
| NCI_Signaling_events_mediated_by_focal_adhesion_kinase_Main_Pathway                                                                                                | 0,026                      | -0,063                | 0,033                | 47                    | 0,030                  |
| NCI_Signaling_events_mediated_by_focal_adhesion_kinase_Pathway_(apoptosis)                                                                                         | 0,095                      | -0,206                | 0,104                | 4                     | 0,099                  |
| NCI_Signaling_events_mediated_by_focal_adhesion_kinase_Pathway_(cell_migration)                                                                                    | 0,016                      | -0,031                | 0,019                | 12                    | 0,017                  |
| NCI_Signaling_events_mediated_by_focal_adhesion_kinase_Pathway_(negative_regulation_of_cell_adhesion_involved_in_substrate_bound_cell_migration)                   | 0,040                      | -0,004                | 0,032                | 12                    | 0,036                  |
| NCI_Signaling_events_mediated_by_focal_adhesion_kinase_Pathway_(regulation_of_cell_cycle)                                                                          | 0,143                      | -0,338                | 0,109                | 4                     | 0,126                  |
| NCI_Signaling_events_mediated_by_HDAC_Class_I_Main_Pathway                                                                                                         | -0,037                     | 0,023                 | 0,017                | 52                    | -0,010                 |
| NCI_Signaling_events_mediated_by_HDAC_Class_I_Pathway_(histone_deacetylation)                                                                                      | -0,055                     | 0,129                 | -0,006               | 18                    | -0,031                 |
| NCI_Signaling_events_mediated_by_HDAC_Class_I_Pathway_(proteasomal_ubiquitin_dependent_protein_catabolic_process)                                                  | -0,030                     | -0,007                | 0,024                | 4                     | -0,003                 |
| NCI_Signaling_events_mediated_by_HDAC_Class_II_Main_Pathway                                                                                                        | -0,024                     | 0,022                 | 0,010                | 29                    | -0,007                 |
| NCI_Signaling_events_mediated_by_HDAC_Class_III_Main_Pathway                                                                                                       | -0,004                     | -0,057                | 0,069                | 17                    | 0,032                  |
| NCI_Signaling_events_mediated_by_HDAC_Class_III_Pathway_(muscle_cell_differentiation)                                                                              | -0,075                     | -0,193                | 0,075                | 8                     | 0,000                  |
| NCI_Signaling_events_mediated_by_HDAC_Class_III_Pathway_(regulation_of_S_phase_of_mitotic_cell_cycle)                                                              | -0,090                     | -0,232                | 0,090                | 7                     | 0,000                  |
| NCI_Signaling_events_mediated_by_Hepatocyte_Growth_Factor_Receptor_c_Met_Main_Pathway                                                                              | 0,009                      | 0,001                 | 0,010                | 72                    | 0,010                  |
| NCI_Signaling_events_mediated_by_Hepatocyte_Growth_Factor_Receptor_c_Met_Pathway_(apoptosis)                                                                       | 0,018                      | 0,112                 | -0,045               | 4                     | -0,014                 |
| NCI_Signaling_events_mediated_by_Hepatocyte_Growth_Factor_Receptor_c_Met_Pathway_(Pathway_positive_regulation_of_NF_kappaB_transcription_factor_activity_via_RAF1) | -0,040                     | -0,000                | -0,001               | 9                     | -0,020                 |
| NCI_Signaling_events_mediated_by_Hepatocyte_Growth_Factor_Receptor_c_Met_Pathway_(positive_regulation_of_tyrosine_phosphorylation_of_STAT_protein)                 | 0,033                      | -0,056                | 0,030                | 17                    | 0,031                  |
| NCI_Signaling_events_mediated_by_Hepatocyte_Growth_Factor_Receptor_c_Met_Pathway_(translational_initiation)                                                        | 0,013                      | 0,122                 | -0,015               | 9                     | -0,001                 |

| Pathway                                                                                                                           | Tumour_MDA_MB.231_Invasive | Tumour_AU565_Invasive | Tumour_T47D_Invasive | Number of genes in PW | Mean (MDA_MB.231_T47D) |
|-----------------------------------------------------------------------------------------------------------------------------------|----------------------------|-----------------------|----------------------|-----------------------|------------------------|
| NCI_Signaling_events_mediated_by_PRL_Main_Pathway                                                                                 | 0,032                      | -0,056                | 0,018                | 21                    | 0,025                  |
| NCI_Signaling_events_mediated_by_PRL_Pathway_(cell_motility)                                                                      | -0,002                     | 0,057                 | -0,020               | 5                     | -0,011                 |
| NCI_Signaling_events_mediated_by_PRL_Pathway_(mitosis)                                                                            | 0,081                      | -0,283                | 0,083                | 2                     | 0,082                  |
| NCI_Signaling_events_mediated_by_PTP1B_Main_Pathway                                                                               | 0,025                      | -0,100                | -0,004               | 13                    | 0,011                  |
| NCI_Signaling_events_mediated_by_PTP1B_Pathway_(cell_migration)                                                                   | -0,100                     | 0,127                 | -0,075               | 3                     | -0,087                 |
| NCI_Signaling_events_mediated_by_PTP1B_Pathway_(Ras_protein_signal_transduction)                                                  | -0,100                     | 0,127                 | -0,075               | 3                     | -0,087                 |
| NCI_Signaling_events_mediated_by_Stem_cell_factor_receptor_c_Kit_Main_Pathway                                                     | -0,083                     | 0,053                 | 0,015                | 50                    | -0,034                 |
| NCI_Signaling_events_mediated_by_Stem_cell_factor_receptor_c_Kit_Pathway_(actin_filament_polymerization)                          | 0                          | 0                     | 0                    | 3                     | 0                      |
| NCI_Signaling_events_mediated_by_Stem_cell_factor_receptor_c_Kit_Pathway_(cell_migration)                                         | 0                          | 0                     | 0                    | 3                     | 0                      |
| NCI_Signaling_events_mediated_by_Stem_cell_factor_receptor_c_Kit_Pathway_(cell_motility)                                          | 0,066                      | -0,160                | 0,023                | 9                     | 0,045                  |
| NCI_Signaling_events_mediated_by_Stem_cell_factor_receptor_c_Kit_Pathway_(cell_proliferation)                                     | 0,059                      | -0,025                | -0,004               | 3                     | 0,028                  |
| NCI_Signaling_events_mediated_by_Stem_cell_factor_receptor_c_Kit_Pathway_(megakaryocyte_differentiation)                          | 0                          | 0                     | 0                    | 3                     | 0                      |
| NCI_Signaling_events_mediated_by_Stem_cell_factor_receptor_c_Kit_Pathway_(Pathway_positive_regulation_of_transcription_via_MAPK3) | 0,025                      | 0,029                 | -0,010               | 4                     | 0,007                  |
| NCI_Signaling_events_mediated_by_Stem_cell_factor_receptor_c_Kit_Pathway_(positive_regulation_of_cell_proliferation)              | 0,066                      | -0,160                | 0,023                | 9                     | 0,045                  |
| NCI_Signaling_events_mediated_by_Stem_cell_factor_receptor_c_Kit_Pathway_(response_to_radiation)                                  | 0                          | 0                     | 0                    | 3                     | 0                      |
| NCI_Signaling_events_mediated_by_TCPTP_Main_Pathway                                                                               | -0,007                     | 0,104                 | -0,027               | 32                    | -0,017                 |
| NCI_Signaling_events_mediated_by_TCPTP_Pathway_(G1_S_transition_of_mitotic_cell_cycle)                                            | 0,031                      | -0,161                | 0,032                | 12                    | 0,032                  |
| NCI_Signaling_events_mediated_by_TCPTP_Pathway_(macrophage_differentiation)                                                       | 0,048                      | -0,217                | 0,041                | 13                    | 0,044                  |
| NCI_Signaling_events_mediated_by_TCPTP_Pathway_(MAPKKK_cascade)                                                                   | 0,031                      | -0,161                | 0,032                | 12                    | 0,032                  |
| NCI_Signaling_events_mediated_by_TCPTP_Pathway_(positive_regulation_of_S_phase_of_mitotic_cell_cycle)                             | 0,001                      | 0,029                 | 0,013                | 14                    | 0,007                  |
| NCI_Signaling_events_mediated_by_TCPTP_Pathway_(regulation_of_gluconeogenesis)                                                    | 0,059                      | -0,269                | 0,050                | 11                    | 0,055                  |
| NCI_Signaling_events_mediated_by_the_Hedgehog_family_Main_Pathway                                                                 | 0,011                      | -0,048                | 0,016                | 21                    | 0,013                  |
| NCI_Signaling_events_mediated_by_the_Hedgehog_family_Pathway_(catabolic_process)                                                  | 0                          | 0                     | 0                    | 3                     | 0                      |
| NCI_Signaling_events_mediated_by_the_Hedgehog_family_Pathway_(determination_of_left_right_symmetry)                               | 0,042                      | -0,060                | 0,027                | 6                     | 0,035                  |
| NCI_Signaling_events_mediated_by_the_Hedgehog_family_Pathway_(heart_development)                                                  | 0,042                      | -0,060                | 0,027                | 6                     | 0,035                  |
| NCI_Signaling_events_mediated_by_the_Hedgehog_family_Pathway_(heart_looping)                                                      | 0,042                      | -0,060                | 0,027                | 6                     | 0,035                  |
| NCI_Signaling_events_mediated_by_the_Hedgehog_family_Pathway_(pancreas_development)                                               | 0                          | 0                     | 0                    | 2                     | 0                      |
| NCI_Signaling_events_mediated_by_the_Hedgehog_family_Pathway_(receptor_mediated_endocytosis)                                      | 0,012                      | -0,052                | 0,007                | 13                    | 0,009                  |
| NCI_Signaling_events_mediated_by_the_Hedgehog_family_Pathway_(somite_specification)                                               | 0,042                      | -0,060                | 0,027                | 6                     | 0,035                  |
| NCI_Signaling_events_mediated_by_VEGFR1_and_VEGFR2_Main_Pathway                                                                   | -0,008                     | -0,024                | 0,019                | 63                    | 0,006                  |
| NCI_Signaling_events_mediated_by_VEGFR1_and_VEGFR2_Pathway_(angiogenesis)                                                         | -0,019                     | -0,094                | 0,057                | 31                    | 0,019                  |
| NCI_Signaling_events_mediated_by_VEGFR1_and_VEGFR2_Pathway_(cell_proliferation)                                                   | 0,043                      | -0,049                | 0,007                | 13                    | 0,025                  |
| NCI_Signaling_events_mediated_by_VEGFR1_and_VEGFR2_Pathway_(focal_adhesion_assembly)                                              | 0,068                      | -0,157                | 0,040                | 13                    | 0,054                  |
| NCI_Signaling_events_mediated_by_VEGFR1_and_VEGFR2_Pathway_(Pathway_degradation_of_AKAP1)                                         | -0,334                     | 0,262                 | 0,110                | 1                     | -0,112                 |
| NCI_Signaling_events_mediated_by_VEGFR1_and_VEGFR2_Pathway_(regulation_of_vascular_permeability)                                  | -0,018                     | -0,090                | 0,055                | 32                    | 0,018                  |
| NCI_Signaling_events_mediated_by_VEGFR1_and_VEGFR2_Pathway_(stress_fiber_assembly)                                                | -0,006                     | 0,009                 | -0,035               | 3                     | -0,021                 |
| NCI_Signaling_events_regulated_by_Ret_tyrosine_kinase_Main_Pathway                                                                | 0,002                      | 0,002                 | -0,001               | 31                    | 0,001                  |
| NCI_Signaling_events_regulated_by_Ret_tyrosine_kinase_Pathway_(activation_of_MAPKK_activity)                                      | -0,022                     | 0,063                 | -0,024               | 7                     | -0,023                 |
| NCI_Signaling_events_regulated_by_Ret_tyrosine_kinase_Pathway_(lamellipodium_assembly)                                            | -0,003                     | 0,031                 | -0,035               | 12                    | -0,019                 |

| Pathway                                                                                                                              | Tumour_MDA_MB.231_Invasive | Tumour_AU565_Invasive | Tumour_T47D_Invasive | Number of genes in PW | Mean (MDA_MB.231_T47D) |
|--------------------------------------------------------------------------------------------------------------------------------------|----------------------------|-----------------------|----------------------|-----------------------|------------------------|
| NCI_Signaling_events_regulated_by_Ret_tyrosine_kinase_Pathway_(MAPKKK_cascade)                                                       | -0,030                     | 0,069                 | -0,034               | 5                     | -0,032                 |
| NCI_Signaling_events_regulated_by_Ret_tyrosine_kinase_Pathway_(tube_development)                                                     | -0,030                     | 0,069                 | -0,034               | 5                     | -0,032                 |
| NCI_Signaling_mediated_by_p38_alpha_and_p38_beta_Main_Pathway                                                                        | -0,018                     | -0,003                | 0,011                | 33                    | -0,003                 |
| NCI_Signaling_mediated_by_p38_gamma_and_p38_delta_Main_Pathway                                                                       | -0,010                     | 0,071                 | 0,006                | 11                    | -0,002                 |
| NCI_Signaling_mediated_by_p38_gamma_and_p38_delta_Pathway_(G2_M_transition_checkpoint)                                               | 0,025                      | -0,007                | 0,014                | 4                     | 0,020                  |
| NCI_Sphingosine_1_phosphate_S1P_Main_Pathway                                                                                         | -0,025                     | -0,065                | 0,028                | 20                    | 0,001                  |
| NCI_Stabilization_and_expansion_of_the_E_cadherin_adherens_junction_Main_Pathway                                                     | 0,014                      | 0,026                 | 0,013                | 41                    | 0,013                  |
| NCI_Stabilization_and_expansion_of_the_E_cadherin_adherens_junction_Pathway_(actin_cable_formation)                                  | 0,023                      | 0,019                 | 0,019                | 15                    | 0,021                  |
| NCI_Stabilization_and_expansion_of_the_E_cadherin_adherens_junction_Pathway_(actin_cytoskeleton_organization)                        | -0,012                     | 0,008                 | 0,023                | 6                     | 0,005                  |
| NCI_Stabilization_and_expansion_of_the_E_cadherin_adherens_junction_Pathway_(adherens_junction_assembly)                             | -0,019                     | 0,050                 | 0,005                | 13                    | -0,007                 |
| NCI_Stabilization_and_expansion_of_the_E_cadherin_adherens_junction_Pathway_(adherens_junction_organization)                         | -0,018                     | 0,089                 | -0,036               | 3                     | -0,027                 |
| NCI_Stabilization_and_expansion_of_the_E_cadherin_adherens_junction_Pathway_(cortical_microtubule_organization)                      | -0,056                     | 0,148                 | 0,008                | 4                     | -0,024                 |
| NCI_Stabilization_and_expansion_of_the_E_cadherin_adherens_junction_Pathway_(epithelial_cell_differentiation)                        | -0,056                     | 0,148                 | 0,008                | 4                     | -0,024                 |
| NCI_Stabilization_and_expansion_of_the_E_cadherin_adherens_junction_Pathway_(establishment_of_epithelial_cell_apical_basal_polarity) | -0,040                     | -0,011                | 0,009                | 9                     | -0,015                 |
| NCI_Stabilization_and_expansion_of_the_E_cadherin_adherens_junction_Pathway_(regulation_of_calcium_dependent_cell_cell_adhesion)     | -0,045                     | 0,118                 | 0,006                | 5                     | -0,019                 |
| NCI_Stabilization_and_expansion_of_the_E_cadherin_adherens_junction_Pathway_(regulation_of_cell_cell_adhesion)                       | -0,014                     | 0,035                 | 0,003                | 9                     | -0,005                 |
| NCI_Stabilization_and_expansion_of_the_E_cadherin_adherens_junction_Pathway_(Wnt_receptor_signaling_pathway)                         | -0,056                     | 0,148                 | 0,008                | 4                     | -0,024                 |
| NCI_Sumoylation_by_RanBP2_regulates_transcriptional_repression_Main_Pathway                                                          | -0,040                     | 0,052                 | 0,014                | 15                    | -0,013                 |
| NCI_Syndecan_1_mediated_signaling_events_Main_Pathway                                                                                | 0,008                      | -0,045                | 0,012                | 32                    | 0,010                  |
| NCI_Syndecan_1_mediated_signaling_events_Pathway_(homophilic_cell_adhesion)                                                          | -0,020                     | 0,022                 | 0,001                | 27                    | -0,009                 |
| NCI_Syndecan_1_mediated_signaling_events_Pathway_(positive_regulation_of_cell_migration)                                             | -0,020                     | 0,022                 | 0,001                | 27                    | -0,009                 |
| NCI_Syndecan_1_mediated_signaling_events_Pathway_(Tumor_Cell_Invasion)                                                               | -0,020                     | 0,022                 | 0,001                | 27                    | -0,009                 |
| NCI_Syndecan_2_mediated_signaling_events_Main_Pathway                                                                                | 0,023                      | -0,097                | 0,018                | 27                    | 0,021                  |
| NCI_Syndecan_2_mediated_signaling_events_Pathway_(dendrite_morphogenesis)                                                            | -0,004                     | -0,043                | -0,012               | 6                     | -0,008                 |
| NCI_Syndecan_2_mediated_signaling_events_Pathway_(determination_of_left_right_symmetry)                                              | -0,004                     | -0,043                | -0,012               | 6                     | -0,008                 |
| NCI_Syndecan_2_mediated_signaling_events_Pathway_(positive_regulation_of_cell_cell_adhesion)                                         | 0,042                      | -0,042                | -0,014               | 7                     | 0,014                  |
| NCI_Syndecan_3_mediated_signaling_events_Main_Pathway                                                                                | 0,017                      | -0,278                | 0,100                | 15                    | 0,058                  |
| NCI_Syndecan_3_mediated_signaling_events_Pathway_(limb_bud_formation)                                                                | 0,032                      | -0,155                | 0,078                | 12                    | 0,055                  |
| NCI_Syndecan_4_mediated_signaling_events_Main_Pathway                                                                                | 0,026                      | -0,010                | -0,009               | 21                    | 0,008                  |
| NCI_Syndecan_4_mediated_signaling_events_Pathway_(cell_migration)                                                                    | 0,018                      | 0,007                 | 0,001                | 11                    | 0,009                  |
| NCI_TCR_signaling_in_naive_CD4_T_cells_Main_Pathway                                                                                  | -0,002                     | 0,012                 | 0,007                | 60                    | 0,003                  |
| NCI_TCR_signaling_in_naive_CD4_T_cells_Pathway_(proteasomal_ubiquitin_dependent_protein_catabolic_process)                           | -0,025                     | 0,045                 | -0,017               | 19                    | -0,021                 |
| NCI_TCR_signaling_in_naive_CD8_T_cells_Main_Pathway                                                                                  | -0,005                     | 0,001                 | -0,004               | 53                    | -0,004                 |
| NCI_TCR_signaling_in_naive_CD8_T_cells_Pathway_(Pathway_regulation_of_survival_gene_product_expression_via_AKT1)                     | -0,065                     | 0,105                 | -0,008               | 17                    | -0,037                 |
| NCI_TGF_beta_receptor_signaling_Main_Pathway                                                                                         | 0,012                      | 0,155                 | -0,042               | 34                    | -0,015                 |
| NCI_TGF_beta_receptor_signaling_Pathway_(JNK_cascade)                                                                                | -0,017                     | 0,141                 | 0,020                | 8                     | 0,001                  |
| NCI_Thromboxane_A2_receptor_signaling_Main_Pathway                                                                                   | -0,015                     | 0,074                 | 0,006                | 48                    | -0,004                 |
| NCI_Thromboxane_A2_receptor_signaling_Pathway_(cAMP_biosynthetic_process)                                                            | 0,021                      | -0,082                | 0,037                | 21                    | 0,029                  |
| NCI_Thromboxane_A2_receptor_signaling_Pathway_(JNK_cascade)                                                                          | 0,120                      | -0,242                | 0,057                | 13                    | 0,088                  |
| NCI_Thromboxane_A2_receptor_signaling_Pathway_(MAPKKK_cascade)                                                                       | 0,017                      | -0,055                | 0,021                | 25                    | 0,019                  |
| NCI_Thromboxane_A2_receptor_signaling_Pathway_(platelet_activation)                                                                  | 0,018                      | -0,070                | 0,032                | 24                    | 0,025                  |
| NCI_TNF_receptor_signaling_pathway_Main_Pathway                                                                                      | 0,015                      | -0,073                | 0,045                | 36                    | 0,030                  |
| NCI_TNF_receptor_signaling_pathway_Pathway_(JNK_cascade)                                                                             | -0,001                     | 0,025                 | 0,022                | 14                    | 0,010                  |

| Pathway                                                                                                                  | Tumour_MDA_MB.231_Invasive | Tumour_AU565_Invasive | Tumour_T47D_Invasive | Number of genes in PW | Mean (MDA_MB.231_T47D) |
|--------------------------------------------------------------------------------------------------------------------------|----------------------------|-----------------------|----------------------|-----------------------|------------------------|
| NCI_TRAIL_signaling_Main_Pathway                                                                                         | 0,004                      | 0,020                 | -0,017               | 21                    | -0,006                 |
| NCI_Trk_receptor_signaling_mediated_by_PI3K_and_PLC_gamma_Main_Pathway                                                   | -0,032                     | 0,047                 | -0,005               | 33                    | -0,019                 |
| NCI_Trk_receptor_signaling_mediated_by_PI3K_and_PLC_gamma_Pathway_(axonogenesis)                                         | -0,047                     | 0,143                 | -0,001               | 11                    | -0,024                 |
| NCI_Trk_receptor_signaling_mediated_by_PI3K_and_PLC_gamma_Pathway_(neuron_apoptosis)                                     | -0,047                     | 0,143                 | -0,001               | 11                    | -0,024                 |
| NCI_Trk_receptor_signaling_mediated_by_PI3K_and_PLC_gamma_Pathway_(regulation_of_long_term_neuronal_synaptic_plasticity) | -0,044                     | 0,177                 | -0,016               | 1                     | -0,030                 |
| NCI_Trk_receptor_signaling_mediated_by_the_MAPK_Main_Pathway                                                             | -0,014                     | 0,042                 | -0,000               | 30                    | -0,007                 |
| NCI_Trk_receptor_signaling_mediated_by_the_MAPK_Pathway_(neuron_apoptosis)                                               | -0,016                     | -0,001                | 0,009                | 10                    | -0,004                 |
| NCI_Trk_receptor_signaling_mediated_by_the_MAPK_Pathway_(neuron_projection_morphogenesis)                                | 0,042                      | -0,038                | 0,008                | 7                     | 0,025                  |
| NCI_Urokinase_type_plasminogen_activator_uPA_and_uPAR_mediated_signaling_Main_Pathway                                    | 0,037                      | -0,171                | 0,063                | 37                    | 0,050                  |
| NCI_Urokinase_type_plasminogen_activator_uPA_and_uPAR_mediated_signaling_Pathway_(cell_adhesion)                         | 0,240                      | -0,482                | 0,220                | 3                     | 0,230                  |
| NCI_Urokinase_type_plasminogen_activator_uPA_and_uPAR_mediated_signaling_Pathway_(cell_migration)                        | 0,206                      | -0,460                | 0,204                | 5                     | 0,205                  |
| NCI_Urokinase_type_plasminogen_activator_uPA_and_uPAR_mediated_signaling_Pathway_(cell_proliferation)                    | 0,165                      | -0,352                | 0,164                | 6                     | 0,165                  |
| NCI_Validated_nuclear_estrogen_receptor_alpha_network_Main_Pathway                                                       | -0,176                     | 0,173                 | -0,136               | 47                    | -0,156                 |
| NCI_Validated_nuclear_estrogen_receptor_beta_network_Main_Pathway                                                        | -0,324                     | 0,337                 | -0,345               | 15                    | -0,335                 |
| NCI_Validated_targets_of_C_MYC_transcriptional_activation_Main_Pathway                                                   | -0,016                     | 0,038                 | 0,025                | 56                    | 0,005                  |
| NCI_Validated_targets_of_C_MYC_transcriptional_activation_Pathway_(Pathway_rRNA_transcription_via_MAX)                   | -0,026                     | 0,040                 | 0,035                | 5                     | 0,005                  |
| NCI_Validated_targets_of_C_MYC_transcriptional_repression_Main_Pathway                                                   | -0,026                     | -0,056                | 0,027                | 53                    | 0,000                  |
| NCI_Validated_targets_of_C_MYC_transcriptional_repression_Pathway_(cell_cycle_arrest)                                    | -0,010                     | -0,074                | 0,031                | 12                    | 0,010                  |
| NCI_Validated_transcriptional_targets_of_AP1_family_members_Fra1_and_Fra2_Main_Pathway                                   | -0,241                     | 0,050                 | 0,023                | 17                    | -0,109                 |
| NCI_Validated_transcriptional_targets_of_deltaNp63_isoforms_Main_Pathway                                                 | -0,005                     | -0,005                | -0,001               | 47                    | -0,003                 |
| NCI_Validated_transcriptional_targets_of_deltaNp63_isoforms_Pathway_(Pathway_degradation_of_TP63)                        | -0,001                     | -0,004                | -0,001               | 9                     | -0,001                 |
| NCI_Validated_transcriptional_targets_of_TAp63_isoforms_Main_Pathway                                                     | -0,017                     | 0,099                 | 0,037                | 53                    | 0,010                  |
| NCI_Validated_transcriptional_targets_of_TAp63_isoforms_Pathway_(Metastasis)                                             | -0,030                     | 0,111                 | 0,031                | 14                    | 0,001                  |
| NCI_Validated_transcriptional_targets_of_TAp63_isoforms_Pathway_(Pathway_degradation_of_TP63)                            | -0,030                     | 0,111                 | 0,031                | 13                    | 0,001                  |
| NCI_VEGF_and_VEGFR_signaling_network_Main_Pathway                                                                        | 0,014                      | 0,003                 | -0,065               | 10                    | -0,026                 |
| NCI_VEGFR1_specific_signals_Main_Pathway                                                                                 | 0,023                      | 0,005                 | -0,109               | 6                     | -0,043                 |
| NCI_VEGFR3_signaling_in_lymphatic_endothelium_Main_Pathway                                                               | -0,013                     | 0,006                 | 0,017                | 16                    | 0,002                  |
| NCI_VEGFR3_signaling_in_lymphatic_endothelium_Pathway_(cell_migration)                                                   | 0,024                      | -0,130                | 0,043                | 10                    | 0,033                  |
| NCI_VEGFR3_signaling_in_lymphatic_endothelium_Pathway_(cell_proliferation)                                               | -0,023                     | 0,027                 | -0,012               | 8                     | -0,018                 |
| NCI_VEGFR3_signaling_in_lymphatic_endothelium_Pathway_(DNA_mediated_transformation)                                      | -0,048                     | 0,043                 | -0,010               | 6                     | -0,029                 |
| NCI_VEGFR3_signaling_in_lymphatic_endothelium_Pathway_(lymphangiogenesis)                                                | 0                          | 0                     | 0                    | 3                     | 0                      |
| NCI_VEGFR3_signaling_in_lymphatic_endothelium_Pathway_(vasculogenesis)                                                   | 0                          | 0                     | 0                    | 3                     | 0                      |
| NCI_Visual_signal_transduction_Cones_Main_Pathway                                                                        | 0                          | 0                     | 0                    | 5                     | 0                      |
| NCI_Visual_signal_transduction_Rods_Main_Pathway                                                                         | -0,027                     | 0,016                 | -0,011               | 8                     | -0,019                 |
| NCI_Wnt_signaling_network_Main_Pathway                                                                                   | 0,003                      | -0,059                | 0,028                | 28                    | 0,016                  |
| NCI_Wnt_signaling_network_Pathway_(Wnt_receptor_signaling_pathway_through_beta_catenin)                                  | -0,003                     | -0,011                | 0,006                | 24                    | 0,001                  |
| Neuronal_Development_Induced_by_CDK5                                                                                     | 0,017                      | -0,025                | 0,001                | 81                    | 0,009                  |
| Neuronal_Intermediate_Filaments                                                                                          | -0,011                     | 0,001                 | 0,000                | 10                    | -0,006                 |
| NGF_Pathway                                                                                                              | 0,018                      | -0,063                | 0,036                | 87                    | 0,027                  |
| NGF_Pathway_Actin_Polymerization_Neurite_Outgrowth_and_Differentiation                                                   | -0,012                     | -0,134                | 0,020                | 11                    | 0,004                  |
| NGF_Pathway_Apoptosis                                                                                                    | 0,004                      | 0,016                 | 0,010                | 12                    | 0,007                  |
| NGF_Pathway_Gene_Expression_via_MYC_ELK1_CREB3_NFKB2                                                                     | 0,062                      | -0,160                | 0,076                | 22                    | 0,069                  |
| NGF_Pathway_Neurite_Outgrowth_and_Differentiation                                                                        | 0,025                      | -0,073                | 0,022                | 21                    | 0,024                  |
| NGF_Pathway_Neuronal_Survival                                                                                            | 0,016                      | 0,010                 | 0,009                | 16                    | 0,013                  |
| nicotine_degradation_III                                                                                                 | -0,033                     | 0,041                 | -0,012               | 8                     | -0,023                 |
| nicotine_degradation_IV                                                                                                  | -0,019                     | 0,023                 | -0,007               | 14                    | -0,013                 |

| Pathway                                                                                                                                                                                               | Tumour_MDA_MB.231_Invasive | Tumour_AU565_Invasive | Tumour_T47D_Invasive | Number of genes in PW | Mean (MDA_MB.231_T47D) |
|-------------------------------------------------------------------------------------------------------------------------------------------------------------------------------------------------------|----------------------------|-----------------------|----------------------|-----------------------|------------------------|
| Nicotine_Influence_on_Glutamatergic_Neurons                                                                                                                                                           | -0,035                     | 0,010                 | 0,006                | 56                    | -0,015                 |
| Nitric_Oxide_Pathway_in_Skeletal_Muscle                                                                                                                                                               | -0,010                     | 0,005                 | 0,000                | 36                    | -0,005                 |
| Non-Junctional_Cell_Adhesion_in_Endothelium                                                                                                                                                           | 0,042                      | -0,163                | 0,046                | 35                    | 0,044                  |
| noradrenaline_and_adrenaline_degradation                                                                                                                                                              | -0,061                     | -0,011                | -0,019               | 11                    | -0,040                 |
| Notch_Signaling_Pathway                                                                                                                                                                               | 0,021                      | -0,068                | 0,027                | 33                    | 0,024                  |
| Notch_Signaling_Pathway_gamma_Secretase                                                                                                                                                               | 0,009                      | -0,263                | 0,084                | 6                     | 0,047                  |
| Notch_Signaling_Pathway_Gene_Expression_Chromatin_Remodeling_via_RBPJ                                                                                                                                 | 0,023                      | -0,025                | 0,014                | 27                    | 0,019                  |
| Notch_Signaling_Pathway_Transcription_of_Target_Genes_Hairy_E-Spl_via_RBPJ                                                                                                                            | 0,023                      | -0,025                | 0,014                | 27                    | 0,019                  |
| oleate_biosynthesis                                                                                                                                                                                   | 0,024                      | -0,090                | 0,014                | 6                     | 0,019                  |
| ornithine_ide_novo_i_biosynthesis                                                                                                                                                                     | -0,122                     | -0,008                | 0,045                | 4                     | -0,039                 |
| Outside-in_Signaling_through_Integrins                                                                                                                                                                | 0,045                      | -0,059                | 0,019                | 50                    | 0,032                  |
| oxidative_ethanol_degradation_III                                                                                                                                                                     | -0,110                     | 0,044                 | -0,027               | 7                     | -0,068                 |
| oxidized_GTP_and_dGTP_detoxification                                                                                                                                                                  | -0,023                     | 0,225                 | 0,147                | 1                     | 0,062                  |
| p38_Signaling_Pathway                                                                                                                                                                                 | -0,012                     | -0,023                | 0,011                | 487                   | -0,001                 |
| p38_Signaling_Pathway_Actin_Cytoskeleton_Reorganization                                                                                                                                               | 0,083                      | -0,190                | 0,070                | 5                     | 0,077                  |
| p38_Signaling_Pathway_Apoptosis                                                                                                                                                                       | 0                          | 0                     | 0                    | 2                     | 0                      |
| p38_Signaling_Pathway_Gene_Expression_Cell_Motility_Inflammation_Apoptosis_Osmoregulation_via_MEF2D_TP53_CREB1_ATF2_JUND_ETV1_NFKB2_AP2A1_MAX_FOSL1_CEBPG_ELK1_CDC25C_JUNB_STAT1_SP1_DDIT3_ELK4_CEBPA | -0,001                     | -0,119                | 0,065                | 36                    | 0,032                  |
| p38_Signaling_Pathway_Translation                                                                                                                                                                     | -0,018                     | 0,000                 | -0,019               | 4                     | -0,018                 |
| p53_Signaling_Pathway                                                                                                                                                                                 | 0,024                      | -0,051                | 0,016                | 130                   | 0,020                  |
| p53_Signaling_Pathway_Apoptosis                                                                                                                                                                       | 0,038                      | -0,073                | 0,022                | 49                    | 0,030                  |
| p53_Signaling_Pathway_Breast_Cancer                                                                                                                                                                   | 0,031                      | -0,049                | 0,010                | 35                    | 0,020                  |
| p53_Signaling_Pathway_Cancer                                                                                                                                                                          | 0,038                      | -0,073                | 0,022                | 39                    | 0,030                  |
| p53_Signaling_Pathway_Cell_Cycle_Arrest                                                                                                                                                               | 0,031                      | -0,049                | 0,010                | 49                    | 0,020                  |
| p53_Signaling_Pathway_Cell_Growth_Accumulation                                                                                                                                                        | 0,031                      | -0,049                | 0,010                | 35                    | 0,020                  |
| p53_Signaling_Pathway_DNA_Repair                                                                                                                                                                      | 0,031                      | -0,049                | 0,010                | 36                    | 0,020                  |
| p53_Signaling_Pathway_Exosome_Mediated_Secretion                                                                                                                                                      | 0,031                      | -0,049                | 0,010                | 35                    | 0,020                  |
| p53_Signaling_Pathway_Gene_Expression_Anti-Apoptosis_via_TP53                                                                                                                                         | 0,038                      | -0,073                | 0,022                | 39                    | 0,030                  |
| p53_Signaling_Pathway_Gene_Expression_Cell_Cycle_and_Cell_Growth_via_TP53                                                                                                                             | 0,038                      | -0,073                | 0,022                | 39                    | 0,030                  |
| p53_Signaling_Pathway_Gene_Expression_Cell_Fate_and_Development_via_TP53                                                                                                                              | 0,038                      | -0,073                | 0,022                | 39                    | 0,030                  |
| p53_Signaling_Pathway_Gene_Expression_Cell_Signaling_via_TP53                                                                                                                                         | 0,038                      | -0,073                | 0,022                | 39                    | 0,030                  |
| p53_Signaling_Pathway_Gene_Expression_DNA_Replication_and_Repair_via_TP53                                                                                                                             | 0,038                      | -0,073                | 0,022                | 39                    | 0,030                  |
| p53_Signaling_Pathway_Gene_Expression_ECM_and_Adhesion_via_TP53                                                                                                                                       | 0,038                      | -0,073                | 0,022                | 39                    | 0,030                  |
| p53_Signaling_Pathway_Gene_Expression_Infection_and_Immune_Response_via_TP53                                                                                                                          | 0,038                      | -0,073                | 0,022                | 39                    | 0,030                  |
| p53_Signaling_Pathway_Inhibition_of_Angiogenesis_and_Metastasis                                                                                                                                       | 0,031                      | -0,049                | 0,010                | 38                    | 0,020                  |
| p53_Signaling_Pathway_Inhibition_of_IGF1R_mTOR_Pathways                                                                                                                                               | -0,264                     | 0,237                 | 0                    | 4                     | -0,132                 |
| p53_Signaling_Pathway_Normal_Cell_Cycle_Progression                                                                                                                                                   | 0,038                      | -0,073                | 0,022                | 39                    | 0,030                  |
| PAK_Pathway                                                                                                                                                                                           | 0,011                      | -0,039                | 0,010                | 343                   | 0,010                  |
| PAK_Pathway_Actin_Organization                                                                                                                                                                        | 0,007                      | -0,016                | 0,005                | 250                   | 0,006                  |
| PAK_Pathway_Cell_Survival                                                                                                                                                                             | 0,007                      | -0,016                | 0,005                | 250                   | 0,006                  |
| PAK_Pathway_Contractility_Stress_Fibres_and_Focal_Adhesion                                                                                                                                            | 0,032                      | -0,087                | 0,036                | 53                    | 0,034                  |
| PAK_Pathway_Lamelliopodia_and_Filopodia_Outgrowth                                                                                                                                                     | 0,008                      | -0,019                | 0,007                | 260                   | 0,007                  |
| PAK_Pathway_Paxillin_Disassembly                                                                                                                                                                      | 0                          | 0                     | 0                    | 1                     | 0                      |
| PAK_Pathway_Transcriptional_Activation_and_Filopodia_Formation                                                                                                                                        | 0,124                      | -0,268                | 0,095                | 6                     | 0,109                  |
| palmitate_biosynthesis                                                                                                                                                                                | -0,038                     | 0,040                 | 0,032                | 7                     | -0,003                 |
| pentose_phosphate_pathway                                                                                                                                                                             | -0,013                     | 0,124                 | 0,027                | 7                     | 0,007                  |
| pentose_phosphate_pathway_non-oxidative_branch                                                                                                                                                        | -0,042                     | 0,131                 | -0,009               | 4                     | -0,025                 |
| pentose_phosphate_pathway_oxidative_branch                                                                                                                                                            | 0,024                      | 0,115                 | 0,075                | 3                     | 0,049                  |
| phenylalanine_degradationtyrosine_biosynthesis                                                                                                                                                        | 0                          | 0                     | 0                    | 4                     | 0                      |
| phenylethylamine_degradation_I                                                                                                                                                                        | -0,192                     | 0,078                 | -0,047               | 4                     | -0,120                 |
| phosphatidylcholine_biosynthesis                                                                                                                                                                      | -0,122                     | 0,068                 | -0,041               | 6                     | -0,082                 |
| phosphatidylethanolamine_biosynthesis_II                                                                                                                                                              | -0,167                     | 0,144                 | -0,053               | 6                     | -0,110                 |
| phosphatidylserine_biosynthesis_I                                                                                                                                                                     | -0,042                     | -0,159                | 0,104                | 1                     | 0,031                  |
| phospholipases                                                                                                                                                                                        | -0,102                     | 0,083                 | 0,003                | 39                    | -0,050                 |
| phytol_degradation                                                                                                                                                                                    | -0,140                     | -0,236                | -0,041               | 2                     | -0,090                 |

| Pathway                                                                                                | Tumour_MDA_MB.231_Invasive | Tumour_AU565_Invasive | Tumour_T47D_Invasive | Number of genes in PW | Mean (MDA_MB.231_T47D) |
|--------------------------------------------------------------------------------------------------------|----------------------------|-----------------------|----------------------|-----------------------|------------------------|
| PLAU-mediated_Signaling_Events_During_Cell_Adhesion                                                    | -0,001                     | -0,092                | 0,001                | 30                    | -0,000                 |
| PPAR_Pathway                                                                                           | -0,009                     | -0,010                | 0,005                | 229                   | -0,002                 |
| PPAR_Pathway_Adipocyte_Differentiation_Glucose_Homeostasis_and_Macrophage_Function                     | 0,014                      | -0,003                | 0,045                | 5                     | 0,029                  |
| PPAR_Pathway_Fatty_Acid_Metabolism_Lipid_Homeostasis_and_Skin_Proliferation                            | 0,014                      | -0,003                | 0,045                | 5                     | 0,029                  |
| PPAR_Pathway_Peroxisome_Proliferation_Hepatocarcinogenesis_Fatty_Acid_Metabolism_and_Lipid_Homeostasis | 0,014                      | -0,003                | 0,045                | 5                     | 0,029                  |
| pregnenolone_biosynthesis                                                                              | 0                          | 0                     | 0                    | 1                     | 0                      |
| PRL_Pathway                                                                                            | 0,007                      | -0,054                | 0,023                | 61                    | 0,015                  |
| progesterone_biosynthesis                                                                              | 0                          | 0                     | 0                    | 2                     | 0                      |
| proline_biosynthesis                                                                                   | -0,073                     | 0,100                 | -0,067               | 3                     | -0,070                 |
| proline_degradation                                                                                    | -0,043                     | -0,047                | 0,038                | 2                     | -0,003                 |
| propionyl-CoA_degradation                                                                              | -0,086                     | 0,078                 | -0,055               | 4                     | -0,070                 |
| protein_citrullination                                                                                 | -0,111                     | 0,087                 | -0,006               | 5                     | -0,058                 |
| protein_iO-iNi-acetyl-glucosylation                                                                    | 0,022                      | -0,132                | -0,037               | 2                     | -0,007                 |
| Protein_Kinase_A_Pathway                                                                               | -0,019                     | -0,149                | -0,002               | 6                     | -0,010                 |
| PRPP_biosynthesis                                                                                      | 0,000                      | 0,112                 | -0,006               | 3                     | -0,003                 |
| PTEN_Pathway                                                                                           | 0,013                      | 0,018                 | -0,006               | 491                   | 0,003                  |
| PTEN_Pathway_Adhesion_or_Migration                                                                     | 0,004                      | 0,016                 | -0,002               | 343                   | 0,001                  |
| PTEN_Pathway_Angiogenesis_and_Tumorigenesis                                                            | 0,007                      | -0,014                | 0,003                | 175                   | 0,005                  |
| PTEN_Pathway_Apoptosis                                                                                 | -0,077                     | 0,236                 | -0,086               | 19                    | -0,082                 |
| PTEN_Pathway_Ca2+_Signaling                                                                            | 0,007                      | -0,014                | 0,003                | 175                   | 0,005                  |
| PTEN_Pathway_Cell_Cycle                                                                                | 0,003                      | 0,014                 | -0,008               | 95                    | -0,003                 |
| PTEN_Pathway_Cell_Survival                                                                             | -0,011                     | -0,067                | 0,022                | 16                    | 0,005                  |
| PTEN_Pathway_Differentiation                                                                           | 0,002                      | 0,013                 | -0,007               | 102                   | -0,003                 |
| PTEN_Pathway_DNA_Repair                                                                                | 0,009                      | 0,018                 | -0,021               | 86                    | -0,006                 |
| PTEN_Pathway_Genomic_Stability                                                                         | 0,003                      | 0,021                 | -0,008               | 83                    | -0,003                 |
| PTEN_Pathway_Growth                                                                                    | 0,003                      | 0,014                 | -0,008               | 95                    | -0,003                 |
| PTEN_Pathway_Migration                                                                                 | 0,009                      | 0,022                 | -0,008               | 115                   | 0,000                  |
| PTEN_Pathway_Neuronal_Survival                                                                         | 0,021                      | -0,046                | 0,006                | 7                     | 0,013                  |
| PTEN_Pathway_Proliferation                                                                             | 0,008                      | 0,025                 | -0,010               | 114                   | -0,001                 |
| PTEN_Pathway_Proliferation_CyclinA2_Geminin_AuroraA_PLK1                                               | -0,000                     | -0,018                | 0,020                | 37                    | 0,010                  |
| PTEN_Pathway_Protein_Synthesis                                                                         | 2,306                      | -0,021                | -0,171               | 2                     | 1,068                  |
| PTEN_Pathway_Senescence_Ets2_p16                                                                       | -0,000                     | -0,018                | 0,020                | 37                    | 0,010                  |
| PTEN_Pathway_Synaptic_Transmission                                                                     | 0,003                      | 0,021                 | -0,008               | 85                    | -0,003                 |
| purine_deoxyribonucleosides_degradation                                                                | 0,015                      | 0,088                 | 0,250                | 2                     | 0,132                  |
| purine_deoxyribonucleosides_salvage                                                                    | -0,041                     | 0,028                 | -0,043               | 12                    | -0,042                 |
| purine_nucleotides_degradation                                                                         | -0,003                     | 0,053                 | 0,009                | 11                    | 0,003                  |
| purine_nucleotides_ide_novoi_biosynthesis                                                              | -0,014                     | 0,087                 | -0,029               | 44                    | -0,022                 |
| purine_ribonucleosides_degradation_to_ribose-1-phosphate                                               | 0,012                      | 0,183                 | 0,080                | 3                     | 0,046                  |
| putrescine_biosynthesis_I                                                                              | 0                          | 0                     | 0                    | 1                     | 0                      |
| putrescine_biosynthesis_II                                                                             | -0,100                     | 0,338                 | -0,082               | 2                     | -0,091                 |
| putrescine_degradation_III                                                                             | -0,145                     | 0,116                 | -0,037               | 10                    | -0,091                 |
| pyridoxal_5-phosphate_salvage                                                                          | -0,006                     | 0,026                 | 0,005                | 5                     | -0,001                 |
| pyrimidine_deoxyribonucleosides_degradation                                                            | -0,022                     | 0,069                 | -0,015               | 4                     | -0,019                 |
| pyrimidine_deoxyribonucleosides_salvage                                                                | 0,037                      | -0,135                | 0,033                | 5                     | 0,035                  |
| pyrimidine_deoxyribonucleotide_phosphorylation                                                         | -0,008                     | 0,001                 | -0,032               | 11                    | -0,020                 |
| pyrimidine_deoxyribonucleotides_biosynthesis_from_CTP                                                  | 0,004                      | 0,033                 | -0,009               | 15                    | -0,003                 |
| pyrimidine_deoxyribonucleotides_ide_novoi_biosynthesis                                                 | 0,013                      | 0,017                 | -0,005               | 15                    | 0,004                  |
| pyrimidine_ribonucleosides_degradation                                                                 | -0,015                     | 0,046                 | -0,010               | 6                     | -0,012                 |
| pyrimidine_ribonucleosides_salvage_I                                                                   | -0,032                     | 0,005                 | -0,036               | 4                     | -0,034                 |
| pyruvate_decarboxylation_to_acetyl-CoA                                                                 | -0,072                     | -0,095                | -0,002               | 5                     | -0,037                 |
| Rac1_Signaling                                                                                         | 0,033                      | -0,064                | 0,010                | 15                    | 0,021                  |
| RALA_Signaling                                                                                         | -0,095                     | -0,031                | -0,010               | 8                     | -0,052                 |
| RALB_Signaling                                                                                         | -0,018                     | 0,015                 | 0,008                | 5                     | -0,005                 |
| RANK_Signaling_in_Osteoclasts_Pathway                                                                  | 0,011                      | -0,014                | 0,038                | 73                    | 0,024                  |
| RANK_Signaling_in_Osteoclasts_Pathway_Expression_of_Osteoclastic_Genes_via_JUN_NFAT5_NFKB2_MITF_FOS    | 0,014                      | -0,076                | 0,062                | 33                    | 0,038                  |
| RANK_Signaling_in_Osteoclasts_Pathway_Inhibition_of_Death                                              | 0,051                      | -0,095                | 0,057                | 29                    | 0,054                  |



| Pathway                                                                                                                                                                                         | Tumour_MDA_MB.231_Invasive | Tumour_AU565_Invasive | Tumour_T47D_Invasive | Number of genes in PW | Mean (MDA_MB.231_T47D) |
|-------------------------------------------------------------------------------------------------------------------------------------------------------------------------------------------------|----------------------------|-----------------------|----------------------|-----------------------|------------------------|
| RANK_Signaling_in_Osteoclasts_Pathway_Resorption                                                                                                                                                | 0,029                      | -0,065                | 0,042                | 32                    | 0,036                  |
| Rapoport-Luebering_glycolytic_shunt                                                                                                                                                             | -0,046                     | -0,069                | -0,043               | 2                     | -0,044                 |
| Ras_Pathway                                                                                                                                                                                     | -0,001                     | -0,042                | 0,016                | 441                   | 0,007                  |
| Ras_Pathway_Apoptosis                                                                                                                                                                           | 0,024                      | -0,091                | 0,068                | 33                    | 0,046                  |
| Ras_Pathway_CDC42_Pathway                                                                                                                                                                       | -0,119                     | -0,006                | -0,037               | 4                     | -0,078                 |
| Ras_Pathway_Cell-Cell_Junctions                                                                                                                                                                 | 0,007                      | -0,039                | 0,034                | 25                    | 0,021                  |
| Ras_Pathway_Gene_Expression_Cell_Proliferation_Cell_Survival_Differentiation_Development_Cell_Cycle_Control_Cell_Motility_Tumorigenesis_via_ELK4_ATF2_MEF2D_STAT2_CREB3_CCNA1_MYC_ELK1_JUN_CDK4 | 0,025                      | -0,058                | 0,018                | 64                    | 0,022                  |
| Ras_Pathway_Golgi_Trafficking_and_Vesicle_Formation                                                                                                                                             | -0,089                     | 0,010                 | -0,028               | 10                    | -0,058                 |
| Ras_Pathway_Increased_T-cell_Adhesion                                                                                                                                                           | -0,021                     | -0,072                | 0,026                | 28                    | 0,002                  |
| Ras_Pathway_Receptor_Endocytosis                                                                                                                                                                | -0,007                     | -0,056                | 0,094                | 8                     | 0,044                  |
| Ras_Pathway_RhoA_Pathway                                                                                                                                                                        | -0,023                     | 0,105                 | -0,026               | 9                     | -0,024                 |
| Ras_Signaling                                                                                                                                                                                   | -0,020                     | 0,012                 | -0,008               | 36                    | -0,014                 |
| reactome_2_LTR_circle_formation_Main_Pathway                                                                                                                                                    | -0,064                     | 0,211                 | -0,120               | 7                     | -0,092                 |
| reactome_A_tetrasaccharide_linker_sequence_is_required_for_GAG_synthesis_Main_Pathway                                                                                                           | -0,025                     | 0,020                 | 0,002                | 23                    | -0,011                 |
| reactome_A_third_proteolytic_cleavage_releases_NICD_Main_Pathway                                                                                                                                | -0,037                     | -0,064                | 0,007                | 9                     | -0,015                 |
| reactome_Abacavir_metabolism_Main_Pathway                                                                                                                                                       | -0,066                     | 0,121                 | -0,025               | 5                     | -0,045                 |
| reactome_Abacavir_transmembrane_transport_Main_Pathway                                                                                                                                          | 0                          | 0                     | 0                    | 5                     | 0                      |
| reactome_ABC_family_proteins_mediated_transport_Main_Pathway                                                                                                                                    | -0,018                     | 0,023                 | 0,014                | 15                    | -0,002                 |
| reactome_ABCA_transporters_in_lipid_homeostasis_Main_Pathway                                                                                                                                    | -0,014                     | 0,002                 | 0,002                | 14                    | -0,006                 |
| reactome_Abnormal_metabolism_in_phenylketonuria_Main_Pathway                                                                                                                                    | 0,020                      | 0,119                 | -0,013               | 4                     | 0,003                  |
| reactome_Abortive_elongation_of_HIV_1_transcript_in_the_absence_of_Tat_Main_Pathway                                                                                                             | -0,021                     | -0,037                | -0,015               | 23                    | -0,018                 |
| reactome_Acetylcholine_Neurotransmitter_Release_Cycle_Main_Pathway                                                                                                                              | -0,001                     | 0,026                 | -0,017               | 16                    | -0,009                 |
| reactome_Acetylcholine_regulates_insulin_secretion_Main_Pathway                                                                                                                                 | -0,041                     | 0,054                 | 0,030                | 10                    | -0,006                 |
| reactome_Activated_NOTCH1_Transmits_Signal_to_the_Nucleus_Main_Pathway                                                                                                                          | -0,027                     | -0,088                | 0,017                | 30                    | -0,005                 |
| reactome_Activated_point_mutants_of_FGFR2_Main_Pathway                                                                                                                                          | 0                          | 0                     | 0                    | 14                    | 0                      |
| reactome_activated_TAK1_mediates_p38_MAPK_activation_Main_Pathway                                                                                                                               | -0,017                     | -0,034                | -0,008               | 6                     | -0,013                 |
| reactome_Activation_of_ATR_in_response_to_replication_stress_Main_Pathway                                                                                                                       | -0,064                     | 0,081                 | -0,021               | 37                    | -0,043                 |
| reactome_Activation_of_BAD_and_translocation_to_mitochondria_Main_Pathway                                                                                                                       | 0,014                      | 0,005                 | 0,031                | 8                     | 0,023                  |
| reactome_Activation_of_BID_and_translocation_to_mitochondria_Main_Pathway                                                                                                                       | 0,102                      | -0,066                | 0,061                | 4                     | 0,081                  |
| reactome_Activation_of_BIM_and_translocation_to_mitochondria_Main_Pathway                                                                                                                       | 0,043                      | -0,064                | 0,046                | 3                     | 0,044                  |
| reactome_Activation_of_BMF_and_translocation_to_mitochondria_Main_Pathway                                                                                                                       | 0,040                      | 0,166                 | -0,032               | 3                     | 0,004                  |
| reactome_Activation_of_C3_and_C5_Main_Pathway                                                                                                                                                   | 0,192                      | -0,217                | 0,440                | 3                     | 0,316                  |
| reactome_Activation_of_caspases_through_apoptosome_mediated_cleavage_Main_Pathway                                                                                                               | -0,051                     | 0,065                 | -0,123               | 5                     | -0,087                 |
| reactome_Activation_of_DNA_fragmentation_factor_Main_Pathway                                                                                                                                    | -0,040                     | -0,014                | -0,010               | 11                    | -0,025                 |
| reactome_Activation_of_G_protein_gated_Potassium_channels_Main_Pathway                                                                                                                          | -0,038                     | -0,052                | 0,023                | 15                    | -0,008                 |
| reactome_Activation_of_gene_expression_by_SREBF_SREBP_Main_Pathway                                                                                                                              | 0,021                      | -0,104                | 0,053                | 38                    | 0,037                  |
| reactome_Activation_of_IRF3_IRF7_mediated_by_TBK1_IKK_epsilon_Main_Pathway                                                                                                                      | 0,081                      | -0,086                | 0,010                | 11                    | 0,046                  |
| reactome_Activation_of_Matrix_Metalloproteinases_Main_Pathway                                                                                                                                   | -0,014                     | -0,042                | 0,015                | 21                    | 0,000                  |
| reactome_Activation_of_NF_kappaB_in_B_cells_Main_Pathway                                                                                                                                        | -0,003                     | 0,006                 | 0,004                | 56                    | 0,001                  |
| reactome_Activation_of_NIMA_Kinases_NEK9_NEK6_NEK7_Main_Pathway                                                                                                                                 | 0,052                      | -0,106                | 0,035                | 4                     | 0,043                  |
| reactome_Activation_of_NOXA_and_translocation_to_mitochondria_Main_Pathway                                                                                                                      | -0,116                     | 0,142                 | 0,031                | 3                     | -0,043                 |
| reactome_Activation_of_PKB_Main_Pathway                                                                                                                                                         | -0,056                     | 0,175                 | -0,063               | 4                     | -0,059                 |
| reactome_Activation_of_PPARGC1A_PGC_1alpha_by_phosphorylation_Main_Pathway                                                                                                                      | -0,012                     | 0,026                 | -0,016               | 10                    | -0,014                 |
| reactome_Activation_of_PUMA_and_translocation_to_mitochondria_Main_Pathway                                                                                                                      | -0,116                     | 0,142                 | 0,031                | 3                     | -0,043                 |
| reactome_Activation_of_Rac_Main_Pathway                                                                                                                                                         | -0,054                     | 0,089                 | -0,006               | 14                    | -0,030                 |
| reactome_Activation_of_RAS_in_B_cells_Main_Pathway                                                                                                                                              | -0,057                     | 0,322                 | -0,039               | 5                     | -0,048                 |
| reactome_Activation_of_the_AP_1_family_of_transcription_factors_Main_Pathway                                                                                                                    | 0,022                      | 0,034                 | 0,017                | 10                    | 0,020                  |
| reactome_Activation_of_the_mRNA_upon_binding_of_the_cap_binding_complex_and_elfs_and_subsequent_binding_to_43S_Main_Pathway                                                                     | -0,029                     | 0,128                 | -0,008               | 7                     | -0,019                 |

| Pathway                                                                                                                        | Tumour_MDA_MB.231_Invasive | Tumour_AU565_Invasive | Tumour_T47D_Invasive | Number of genes in PW | Mean (MDA_MB.231_T47D) |
|--------------------------------------------------------------------------------------------------------------------------------|----------------------------|-----------------------|----------------------|-----------------------|------------------------|
| reactome_Activation_of_the_phototransduction_cascade_Main_Pathway                                                              | -0,022                     | 0,013                 | -0,009               | 10                    | -0,015                 |
| reactome_Activation_of_the_pre_replicative_complex_Main_Pathway                                                                | -0,061                     | 0,073                 | -0,003               | 30                    | -0,032                 |
| reactome_Acyl_chain_remodeling_of_CL_Main_Pathway                                                                              | -0,051                     | -0,146                | -0,004               | 6                     | -0,027                 |
| reactome_Acyl_chain_remodeling_of_DAG_and_TAG_Main_Pathway                                                                     | -0,035                     | -0,002                | 0,076                | 5                     | 0,021                  |
| reactome_Acyl_chain_remodelling_of_PC_Main_Pathway                                                                             | -0,039                     | -0,022                | 0,037                | 17                    | -0,001                 |
| reactome_Acyl_chain_remodelling_of_PE_Main_Pathway                                                                             | -0,046                     | -0,026                | 0,032                | 15                    | -0,007                 |
| reactome_Acyl_chain_remodelling_of_PG_Main_Pathway                                                                             | -0,006                     | -0,001                | 0,030                | 10                    | 0,012                  |
| reactome_Acyl_chain_remodelling_of_PL_Main_Pathway                                                                             | 0,023                      | -0,141                | 0,037                | 9                     | 0,030                  |
| reactome_Acyl_chain_remodelling_of_PS_Main_Pathway                                                                             | -0,032                     | 0,015                 | 0,028                | 10                    | -0,002                 |
| reactome_Adenosine_P1_receptors_Main_Pathway                                                                                   | 0                          | 0                     | 0                    | 4                     | 0                      |
| reactome_Adenylate_cyclase_activating_Main_Pathway                                                                             | 0                          | 0                     | 0                    | 10                    | 0                      |
| reactome_Adenylate_cyclase_inhibitory_Main_Pathway                                                                             | -0,016                     | -0,037                | 0,013                | 14                    | -0,002                 |
| reactome_Adherens_junctions_interactions_Main_Pathway                                                                          | 0,029                      | -0,131                | 0,029                | 24                    | 0,029                  |
| reactome_ADP_signalling_through_P2Y_purinoceptor_1_Main_Pathway                                                                | -0,024                     | -0,086                | 0,030                | 24                    | 0,003                  |
| reactome_ADP_signalling_through_P2Y_purinoceptor_12_Main_Pathway                                                               | -0,036                     | -0,059                | 0,024                | 22                    | -0,006                 |
| reactome_Adrenaline_noradrenaline_inhibits_insulin_secretion_Main_Pathway                                                      | -0,036                     | -0,035                | 0,015                | 23                    | -0,010                 |
| reactome_Adrenaline_signalling_through_Alpha_2_adrenergic_receptor_Main_Pathway                                                | 0                          | 0                     | 0                    | 3                     | 0                      |
| reactome_Adrenoceptors_Main_Pathway                                                                                            | 0                          | 0                     | 0                    | 9                     | 0                      |
| reactome_Advanced_glycosylation_endproduct_receptor_signaling_Main_Pathway                                                     | -0,018                     | -0,038                | -0,052               | 8                     | -0,035                 |
| reactome_Aflatoxin_activation_and_detoxification_Main_Pathway                                                                  | 0                          | 0                     | 0                    | 4                     | 0                      |
| reactome_AKT_mediated_inactivation_of_FOXO1A_Main_Pathway                                                                      | 0,016                      | -0,033                | 0,005                | 4                     | 0,010                  |
| reactome_AKT_phosphorylates_targets_in_the_cytosol_Main_Pathway                                                                | 0,024                      | -0,059                | 0,022                | 13                    | 0,023                  |
| reactome_AKT_phosphorylates_targets_in_the_nucleus_Main_Pathway                                                                | -0,011                     | 0,024                 | -0,002               | 8                     | -0,007                 |
| reactome_Alpha_defensins_Main_Pathway                                                                                          | 0                          | 0                     | 0                    | 6                     | 0                      |
| reactome_alpha_linolenic_acid_ALA_metabolism_Main_Pathway                                                                      | -0,099                     | -0,028                | 0,002                | 10                    | -0,048                 |
| reactome_Alpha_oxidation_of_phytanate_Main_Pathway                                                                             | -1,248                     | 0,860                 | -0,080               | 4                     | -0,664                 |
| reactome_Alternative_complement_activation_Main_Pathway                                                                        | 0,144                      | -0,163                | 0,330                | 4                     | 0,237                  |
| reactome_Amine_compound_SLC_transporters_Main_Pathway                                                                          | -0,053                     | 0,618                 | -0,035               | 8                     | -0,044                 |
| reactome_Amine_ligand_binding_receptors_Main_Pathway                                                                           | 0                          | 0                     | 0                    | 7                     | 0                      |
| reactome_Amino_acid_and_oligopeptide_SLC_transporters_Main_Pathway                                                             | 0                          | 0                     | 0                    | 6                     | 0                      |
| reactome_Amino_acid_synthesis_and_interconversion_transamination_Main_Pathway                                                  | -0,065                     | 0,082                 | -0,097               | 9                     | -0,081                 |
| reactome_Amino_acid_transport_across_the_plasma_membrane_Main_Pathway                                                          | -0,038                     | 0,012                 | 0,002                | 30                    | -0,018                 |
| reactome_AMPK_inhibits_chREBP_transcriptional_activation_activity_Main_Pathway                                                 | 0                          | 0                     | 0                    | 5                     | 0                      |
| reactome_Amyloids_Main_Pathway                                                                                                 | -0,022                     | 0,028                 | -0,004               | 50                    | -0,013                 |
| reactome_Anchoring_fibril_formation_Main_Pathway                                                                               | 0,047                      | -0,336                | 0,068                | 7                     | 0,057                  |
| reactome_Androgen_biosynthesis_Main_Pathway                                                                                    | -0,008                     | -0,022                | -0,006               | 9                     | -0,007                 |
| reactome_Antigen_activates_B_Cell_Receptor_BCR_leading_to_generation_of_second_messengers_Main_Pathway                         | -0,011                     | 0,156                 | 0,016                | 29                    | 0,002                  |
| reactome_Antigen_Presentation_Folding_assembly_and_peptide_loading_of_class_I_MHC_Main_Pathway                                 | -0,007                     | -0,169                | 0,092                | 27                    | 0,042                  |
| reactome_Antigen_processing_Ubiquitination_Proteasome_degradation_Main_Pathway                                                 | 0,013                      | -0,009                | 0,004                | 211                   | 0,009                  |
| reactome_APC_C_Cdc20_mediated_degradation_of_Cyclin_B_Main_Pathway                                                             | -0,001                     | 0,049                 | -0,013               | 21                    | -0,007                 |
| reactome_APC_C_Cdc20_mediated_degradation_of_mitotic_proteins_Main_Pathway                                                     | -0,011                     | 0,018                 | -0,002               | 18                    | -0,007                 |
| reactome_APC_C_Cdc20_mediated_degradation_of_Securin_Main_Pathway                                                              | -0,012                     | 0,033                 | -0,006               | 64                    | -0,009                 |
| reactome_APC_C_Cdh1_mediated_degradation_of_Cdc20_and_other_APC_C_Cdh1_targeted_proteins_in_late_mitosis_early_G1_Main_Pathway | -0,008                     | 0,012                 | -0,008               | 69                    | -0,008                 |
| reactome_APC_Cdc20_mediated_degradation_of_Nek2A_Main_Pathway                                                                  | 0,003                      | 0,027                 | -0,005               | 23                    | -0,001                 |
| reactome_APOBEC3G_mediated_resistance_to_HIV_1_infection_Main_Pathway                                                          | -0,120                     | 0,321                 | -0,168               | 4                     | -0,144                 |
| reactome_Apoptotic_cleavage_of_cell_adhesion_proteins_Main_Pathway                                                             | -0,023                     | 0,038                 | 0,014                | 10                    | -0,005                 |
| reactome_Apoptotic_cleavage_of_cellular_proteins_Main_Pathway                                                                  | 0,031                      | -0,052                | 0,024                | 10                    | 0,028                  |
| reactome_Arachidonate_production_from_DAG_Main_Pathway                                                                         | -0,057                     | 0,056                 | 0,010                | 3                     | -0,023                 |
| reactome_ARMS_mediated_activation_Main_Pathway                                                                                 | 0,035                      | -0,298                | 0,096                | 5                     | 0,065                  |
| reactome_Asparagine_N_linked_glycosylation_Main_Pathway                                                                        | -0,064                     | -0,223                | 0,070                | 7                     | 0,003                  |
| reactome_Assembly_Of_The_HIV_Virion_Main_Pathway                                                                               | 0,023                      | 0,135                 | -0,028               | 5                     | -0,002                 |

| Pathway                                                                                                                                  | Tumour_MDA_MB.231_Invasive | Tumour_AU565_Invasive | Tumour_T47D_Invasive | Number of genes in PW | Mean (MDA_MB.231_T47D) |
|------------------------------------------------------------------------------------------------------------------------------------------|----------------------------|-----------------------|----------------------|-----------------------|------------------------|
| reactome_Assembly_of_the_ORC_complex_at_the_origin_of_replication_Main_Pathway                                                           | -0,091                     | 0,076                 | 0,010                | 6                     | -0,041                 |
| reactome_Assembly_of_the_RAD50_MRE11_NBS1_complex_at_DNA_double_strand_breaks_Main_Pathway                                               | -0,030                     | -0,044                | 0,070                | 4                     | 0,020                  |
| reactome_Assembly_of_the_RAD51_ssDNA_nucleoprotein_complex_Main_Pathway                                                                  | 0,025                      | 0,047                 | -0,050               | 5                     | -0,012                 |
| reactome_Association_of_TriC_CCT_with_target_proteins_during_biosynthesis_Main_Pathway                                                   | -0,048                     | 0,153                 | -0,042               | 28                    | -0,045                 |
| reactome_Astrocytic_Glutamate_Glutamine_Uptake_And_Metabolism_Main_Pathway                                                               | 0,055                      | -0,116                | -0,040               | 4                     | 0,007                  |
| reactome_Asymmetric_localization_of_PCP_proteins_Main_Pathway                                                                            | 0,012                      | 0,005                 | 0,008                | 17                    | 0,010                  |
| reactome_ATF6_alpha_activates_chaperone_genes_Main_Pathway                                                                               | 0                          | 0                     | 0                    | 5                     | 0                      |
| reactome_ATF6_alpha_activates_chaperones_Main_Pathway                                                                                    | 0,019                      | -0,076                | 0,016                | 4                     | 0,017                  |
| reactome_ATM_mediated_phosphorylation_of_repair_proteins_Main_Pathway                                                                    | -0,024                     | 0,088                 | 0,025                | 5                     | 0,001                  |
| reactome_ATP_sensitive_Potassium_channels_Main_Pathway                                                                                   | 0                          | 0                     | 0                    | 4                     | 0                      |
| reactome_Attachment_of_GPI_anchor_to_uPAR_Main_Pathway                                                                                   | -0,050                     | -0,020                | 0,046                | 7                     | -0,002                 |
| reactome_Attenuation_phase_Main_Pathway                                                                                                  | 0,003                      | 0,072                 | -0,032               | 11                    | -0,015                 |
| reactome_AUF1_hnRNP_D0_destabilizes_mRNA_Main_Pathway                                                                                    | 0,071                      | -0,002                | 0,024                | 9                     | 0,048                  |
| reactome_Autodegradation_of_Cdh1_by_Cdh1_APC_C_Main_Pathway                                                                              | -0,018                     | 0,052                 | -0,007               | 60                    | -0,013                 |
| reactome_Autodegradation_of_the_E3_ubiquitin_ligase_COP1_Main_Pathway                                                                    | -0,014                     | 0,045                 | -0,008               | 51                    | -0,011                 |
| reactome_Autointegration_results_in_viral_DNA_circles_Main_Pathway                                                                       | -0,109                     | 0,300                 | -0,206               | 3                     | -0,157                 |
| reactome_Axonal_growth_inhibition_RHOA_activation_Main_Pathway                                                                           | -0,002                     | -0,066                | 0,017                | 5                     | 0,007                  |
| reactome_Axonal_growth_stimulation_Main_Pathway                                                                                          | -0,042                     | 0,135                 | -0,034               | 4                     | -0,038                 |
| reactome_Basigin_interactions_Main_Pathway                                                                                               | -0,044                     | -0,071                | 0,059                | 14                    | 0,008                  |
| reactome_Beta_catenin_phosphorylation_cascade_Main_Pathway                                                                               | 0,034                      | -0,051                | -0,007               | 16                    | 0,013                  |
| reactome_Beta_oxidation_of_butanoyl_CoA_to_acetyl_CoA_Main_Pathway                                                                       | -0,090                     | -0,013                | -0,032               | 3                     | -0,061                 |
| reactome_Beta_oxidation_of_decanoyl_CoA_to_octanoyl_CoA_CoA_Main_Pathway                                                                 | -0,146                     | -0,077                | -0,034               | 5                     | -0,090                 |
| reactome_Beta_oxidation_of_hexanoyl_CoA_to_butanoyl_CoA_Main_Pathway                                                                     | -0,110                     | -0,070                | -0,035               | 5                     | -0,072                 |
| reactome_Beta_oxidation_of_lauroyl_CoA_to_decanoyl_CoA_CoA_Main_Pathway                                                                  | -0,110                     | -0,070                | -0,035               | 5                     | -0,072                 |
| reactome_Beta_oxidation_of_myristoyl_CoA_to_lauroyl_CoA_Main_Pathway                                                                     | -0,094                     | -0,104                | -0,026               | 3                     | -0,060                 |
| reactome_Beta_oxidation_of_octanoyl_CoA_to_hexanoyl_CoA_Main_Pathway                                                                     | -0,146                     | -0,077                | -0,034               | 5                     | -0,090                 |
| reactome_Beta_oxidation_of_palmitoyl_CoA_to_myristoyl_CoA_Main_Pathway                                                                   | -0,162                     | 0,004                 | -0,037               | 3                     | -0,099                 |
| reactome_Beta_oxidation_of_pristanoyl_CoA_Main_Pathway                                                                                   | -0,133                     | -0,067                | -0,064               | 7                     | -0,098                 |
| reactome_Beta_oxidation_of_very_long_chain_fatty_acids_Main_Pathway                                                                      | -0,254                     | 0,157                 | -0,027               | 5                     | -0,141                 |
| reactome_betaKlotho_mediated_ligand_binding_Main_Pathway                                                                                 | 0                          | 0                     | 0                    | 3                     | 0                      |
| reactome_BH3_only_proteins_associate_with_and_inactivate_anti_apoptotic_BCL_2_members_Main_Pathway                                       | 0,000                      | -0,058                | 0,045                | 7                     | 0,023                  |
| reactome_Bicarbonate_transporters_Main_Pathway                                                                                           | -0,081                     | -0,142                | 0,077                | 9                     | -0,002                 |
| reactome_Bile_salt_and_organic_anion_SLC_transporters_Main_Pathway                                                                       | 0                          | 0                     | 0                    | 3                     | 0                      |
| reactome_Binding_and_entry_of_HIV_virion_Main_Pathway                                                                                    | -0,039                     | 0,096                 | -0,014               | 4                     | -0,026                 |
| reactome_binding_of_TCF_LEF_CTNNB1_to_target_gene_promoters_Main_Pathway                                                                 | -0,106                     | 0,245                 | 0,052                | 7                     | -0,027                 |
| reactome_Biosynthesis_of_the_N_glycan_precursor_dolichol_lipid_linked_oligosaccharide_LLO_and_transfer_to_a_nascent_protein_Main_Pathway | -0,366                     | 0,311                 | -0,040               | 15                    | -0,203                 |
| reactome_Biotin_transport_and_metabolism_Main_Pathway                                                                                    | -0,094                     | 0,159                 | -0,031               | 11                    | -0,062                 |
| reactome_Branched_chain_amino_acid_catabolism_Main_Pathway                                                                               | -0,101                     | 0,053                 | -0,038               | 17                    | -0,070                 |
| reactome_Budding_and_maturation_of_HIV_virion_Main_Pathway                                                                               | 0,007                      | 0,092                 | -0,021               | 25                    | -0,007                 |
| reactome_Butyrate_Response_Factor_1_BRF1_destabilizes_mRNA_Main_Pathway                                                                  | 0,025                      | 0,085                 | -0,040               | 17                    | -0,007                 |
| reactome_Ca_activated_K_channels_Main_Pathway                                                                                            | 0                          | 0                     | 0                    | 9                     | 0                      |
| reactome_Ca2_Main_Pathway                                                                                                                | -0,007                     | -0,091                | 0,040                | 30                    | 0,016                  |
| reactome_Calmodulin_induced_events_Main_Pathway                                                                                          | 0,002                      | -0,049                | 0,012                | 5                     | 0,007                  |
| reactome_Calnexin_calreticulin_cycle_Main_Pathway                                                                                        | -0,047                     | -0,096                | -0,028               | 5                     | -0,037                 |
| reactome_CaMK_IV_mediated_phosphorylation_of_CREB_Main_Pathway                                                                           | -0,049                     | 0,107                 | -0,013               | 3                     | -0,031                 |
| reactome_Carnitine_synthesis_Main_Pathway                                                                                                | 0,005                      | -0,056                | 0,018                | 4                     | 0,011                  |
| reactome_Caspase_mediated_cleavage_of_cytoskeletal_proteins_Main_Pathway                                                                 | -0,025                     | 0,097                 | 0,025                | 6                     | -0,000                 |
| reactome_Catecholamine_biosynthesis_Main_Pathway                                                                                         | 0                          | 0                     | 0                    | 4                     | 0                      |
| reactome_Cation_coupled_Chloride_cotransporters_Main_Pathway                                                                             | -0,040                     | 0,117                 | -0,027               | 7                     | -0,034                 |
| reactome_CD28_co_stimulation_Main_Pathway                                                                                                | -0,065                     | 0,715                 | -0,037               | 8                     | -0,051                 |

| Pathway                                                                                              | Tumour_MDA_MB.231_Invasive | Tumour_AU565_Invasive | Tumour_T47D_Invasive | Number of genes in PW | Mean (MDA_MB.231_T47D) |
|------------------------------------------------------------------------------------------------------|----------------------------|-----------------------|----------------------|-----------------------|------------------------|
| reactome_CD28_dependent_PI3K_Akt_signaling_Main_Pathway                                              | -0,014                     | 0,050                 | 0,009                | 21                    | -0,003                 |
| reactome_CD28_dependent_Vav1_Main_Pathway                                                            | -0,085                     | 0,221                 | -0,033               | 11                    | -0,059                 |
| reactome_Cdc20_Phospho_APC_C_mediated_degradation_of_Cyclin_A_Main_Pathway                           | -0,007                     | 0,031                 | -0,003               | 69                    | -0,005                 |
| reactome_CDC6_association_with_the_ORC_origin_complex_Main_Pathway                                   | -0,068                     | 0,057                 | 0,007                | 11                    | -0,031                 |
| reactome_CDK_mediated_phosphorylation_and_removal_of_Cdc6_Main_Pathway                               | -0,008                     | 0,035                 | -0,006               | 50                    | -0,007                 |
| reactome_CDO_in_myogenesis_Main_Pathway                                                              | -0,001                     | 0,006                 | -0,000               | 28                    | -0,001                 |
| reactome_CDT1_association_with_the_CDC6_ORC_origin_complex_Main_Pathway                              | -0,016                     | 0,033                 | -0,005               | 58                    | -0,011                 |
| reactome_cell_division_Main_Pathway                                                                  | 0,073                      | -0,158                | 0,025                | 4                     | 0,049                  |
| reactome_Ceramide_signalling_Main_Pathway                                                            | -0,051                     | -0,046                | 0,120                | 3                     | 0,034                  |
| reactome_cGMP_effects_Main_Pathway                                                                   | 0                          | 0                     | 0                    | 17                    | 0                      |
| reactome_Chk1_Chk2_Cds1_mediated_inactivation_of_Cyclin_B_Cdk1_complex_Main_Pathway                  | 0,030                      | 0,052                 | -0,065               | 5                     | -0,017                 |
| reactome_CHL1_interactions_Main_Pathway                                                              | -0,007                     | 0,012                 | -0,003               | 5                     | -0,005                 |
| reactome_Cholesterol_biosynthesis_Main_Pathway                                                       | 0,038                      | -0,227                | 0,074                | 19                    | 0,056                  |
| reactome_Chondroitin_sulfate_biosynthesis_Main_Pathway                                               | -0,022                     | 0,013                 | 0,035                | 19                    | 0,006                  |
| reactome_ChREBP_activates_metabolic_gene_expression_Main_Pathway                                     | 0                          | 0                     | 0                    | 7                     | 0                      |
| reactome_Chylomicron_mediated_lipid_transport_Main_Pathway                                           | -0,033                     | 0,049                 | -0,022               | 17                    | -0,028                 |
| reactome_Circadian_Clock_Main_Pathway                                                                | 0,016                      | -0,009                | -0,004               | 24                    | 0,006                  |
| reactome_Citric_acid_cycle_TCA_cycle_Main_Pathway                                                    | -0,156                     | 0,080                 | -0,029               | 19                    | -0,093                 |
| reactome_Class_A_1_Rhodopsin_like_receptors_Main_Pathway                                             | 0                          | 0                     | 0                    | 16                    | 0                      |
| reactome_Class_C_3_Metabotropic_glutamate_pheromone_receptors_Main_Pathway                           | 0                          | 0                     | 0                    | 38                    | 0                      |
| reactome_Class_II_GLUTs_Main_Pathway                                                                 | 0                          | 0                     | 0                    | 4                     | 0                      |
| reactome_Classical_antibody_mediated_complement_activation_Main_Pathway                              | 0,005                      | -0,011                | 0,002                | 11                    | 0,004                  |
| reactome_Classical_Kir_channels_Main_Pathway                                                         | 0                          | 0                     | 0                    | 4                     | 0                      |
| reactome_Clatrin_derived_vesicle_budding_Main_Pathway                                                | -0,014                     | -0,094                | 0,037                | 5                     | 0,012                  |
| reactome_Clearance_of_Nuclear_Envelope_Membranes_from_Chromatin_Main_Pathway                         | 0,136                      | 0,154                 | 0,014                | 5                     | 0,075                  |
| reactome_Cleavage_of_Growing_Transcript_in_the_Termination_Region_Main_Pathway                       | -0,061                     | 0,137                 | -0,021               | 33                    | -0,041                 |
| reactome_Cleavage_of_the_damaged_purine_Main_Pathway                                                 | 0,029                      | 0,161                 | -0,015               | 3                     | 0,007                  |
| reactome_Cleavage_of_the_damaged_pyrimidine_Main_Pathway                                             | 0,050                      | 0,089                 | 0,019                | 5                     | 0,034                  |
| reactome_Cobalamin_Cbl_vitamin_B12_transport_and_metabolism_Main_Pathway                             | -0,042                     | 0,028                 | 0,014                | 19                    | -0,014                 |
| reactome_Coenzyme_A_biosynthesis_Main_Pathway                                                        | -0,017                     | 0,145                 | -0,037               | 8                     | -0,027                 |
| reactome_Cohesin>Loading_onto_Chromatin_Main_Pathway                                                 | -0,090                     | 0,148                 | -0,066               | 10                    | -0,078                 |
| reactome_Collagen_biosynthesis_and_modifying_enzymes_Main_Pathway                                    | 0,004                      | -0,091                | 0,034                | 54                    | 0,019                  |
| reactome_Collagen_degradation_Main_Pathway                                                           | 0,013                      | -0,031                | 0,013                | 25                    | 0,013                  |
| reactome_Common_Pathway_Main_Pathway                                                                 | 0                          | 0                     | 0                    | 14                    | 0                      |
| reactome_Condensation_of_Prometaphase_Chromosomes_Main_Pathway                                       | -0,077                     | 0,266                 | -0,019               | 6                     | -0,048                 |
| reactome_Condensation_of_Prophase_Chromosomes_Main_Pathway                                           | -0,004                     | 0,022                 | 0,010                | 40                    | 0,003                  |
| reactome_Conjugation_of_benzoate_with_glycine_Main_Pathway                                           | 0                          | 0                     | 0                    | 5                     | 0                      |
| reactome_Conjugation_of_salicylate_with_glycine_Main_Pathway                                         | 0                          | 0                     | 0                    | 7                     | 0                      |
| reactome_Constitutive_PI3K_AKT_Signaling_in_Cancer_Main_Pathway                                      | 0,001                      | -0,005                | 0,014                | 23                    | 0,007                  |
| reactome_Constitutive_Signaling_by_NOTCH1_HD_Domain_Mutants_Main_Pathway                             | -0,025                     | 0,002                 | -0,030               | 15                    | -0,027                 |
| reactome_Constitutive_Signaling_by_NOTCH1_HD_PEST_Domain_Mutants_Main_Pathway                        | -0,008                     | -0,012                | 0,013                | 53                    | 0,002                  |
| reactome_Constitutive_Signaling_by_NOTCH1_PEST_Domain_Mutants_Main_Pathway                           | -0,008                     | -0,012                | 0,013                | 53                    | 0,002                  |
| reactome_Constitutive_Signaling_by_NOTCH1_t_7_9_NOTCH1_M1580_K2555_Translocation_Mutant_Main_Pathway | -0,080                     | -0,104                | 0,015                | 3                     | -0,033                 |
| reactome_Conversion_from_APC_C_Cdc20_to_APC_C_Cdh1_in_late_anaphase_Main_Pathway                     | -0,022                     | 0,027                 | -0,006               | 17                    | -0,014                 |
| reactome_COPII_Mediated_Transport_Main_Pathway                                                       | 0,019                      | -0,003                | -0,025               | 10                    | -0,003                 |
| reactome_COPII_Coat_Protein_2_Mediated_Vesicle_Transport_Main_Pathway                                | 0,042                      | -0,006                | 0,016                | 9                     | 0,029                  |
| reactome_Costimulation_by_the_CD28_family_Main_Pathway                                               | -0,010                     | 0,057                 | -0,001               | 9                     | -0,006                 |
| reactome_Creatine_metabolism_Main_Pathway                                                            | 0                          | 0                     | 0                    | 6                     | 0                      |
| reactome_CREB_phosphorylation_Main_Pathway                                                           | -0,028                     | 0,040                 | 0,007                | 7                     | -0,011                 |

| Pathway                                                                                              | Tumour_MDA_MB.231_Invasive | Tumour_AU565_Invasive | Tumour_T47D_Invasive | Number of genes in PW | Mean (MDA_MB.231_T47D) |
|------------------------------------------------------------------------------------------------------|----------------------------|-----------------------|----------------------|-----------------------|------------------------|
| reactome_CREB_phosphorylation_through_the_activation_of_Adenylate_Cyclase_Main_Pathway               | -0,048                     | 0,077                 | -0,039               | 7                     | -0,044                 |
| reactome_CREB_phosphorylation_through_the_activation_of_CaMKII_Main_Pathway                          | 0,003                      | -0,018                | 0,016                | 15                    | 0,010                  |
| reactome_CREB_phosphorylation_through_the_activation_of_CaMKK_Main_Pathway                           | 0,097                      | -0,133                | 0,040                | 4                     | 0,068                  |
| reactome_CREB_phosphorylation_through_the_activation_of_Ras_Main_Pathway                             | 0,004                      | -0,034                | 0,035                | 13                    | 0,020                  |
| reactome_CRMPs_in_Sema3A_signaling_Main_Pathway                                                      | 0,018                      | -0,011                | -0,009               | 16                    | 0,005                  |
| reactome_Cross_presentation_of_particulate_exogenous_antigens_phagosomes_Main_Pathway                | 0,042                      | -0,081                | -0,004               | 8                     | 0,019                  |
| reactome_Cross_presentation_of_soluble_exogenous_antigens_endosomes_Main_Pathway                     | -0,014                     | 0,028                 | -0,004               | 49                    | -0,009                 |
| reactome_Crosslinking_of_collagen_fibrils_Main_Pathway                                               | 0,007                      | -0,186                | 0,048                | 9                     | 0,027                  |
| reactome_CS_DS_degradation_Main_Pathway                                                              | 0,005                      | 0,068                 | -0,028               | 12                    | -0,012                 |
| reactome_CTLA4_inhibitory_signaling_Main_Pathway                                                     | -0,001                     | 0,242                 | -0,014               | 21                    | -0,007                 |
| reactome_Cyclin_A_B1_associated_events_during_G2_M_transition_Main_Pathway                           | 0,050                      | -0,054                | -0,020               | 21                    | 0,015                  |
| reactome_Cyclin_A_Cdk2_associated_events_at_S_phase_entry_Main_Pathway                               | 0,008                      | -0,028                | 0,011                | 13                    | 0,009                  |
| reactome_Cyclin_B2_mediated_events_Main_Pathway                                                      | 0,063                      | 0,089                 | -0,097               | 5                     | -0,017                 |
| reactome_Cyclin_D_associated_events_in_G1_Main_Pathway                                               | 0,015                      | -0,019                | -0,004               | 38                    | 0,006                  |
| reactome_Cyclin_E_associated_events_during_G1_S_transition_Main_Pathway                              | -0,005                     | -0,018                | 0,021                | 14                    | 0,008                  |
| reactome_CYP2E1_reactions_Main_Pathway                                                               | -0,024                     | 0,030                 | -0,009               | 11                    | -0,016                 |
| reactome_Cytosolic_iron_sulfur_cluster_assembly_Main_Pathway                                         | -0,037                     | 0,058                 | -0,006               | 13                    | -0,022                 |
| reactome_Cytosolic_sensors_of_pathogen_associated_DNA_Main_Pathway                                   | -0,023                     | 0,033                 | -0,024               | 22                    | -0,023                 |
| reactome_Cytosolic_sulfonation_of_small_molecules_Main_Pathway                                       | -0,109                     | 0,274                 | -0,095               | 4                     | -0,102                 |
| reactome_Cytosolic_tRNA_aminacylation_Main_Pathway                                                   | -0,037                     | 0,078                 | -0,037               | 24                    | -0,037                 |
| reactome_DAG_and_IP3_signaling_Main_Pathway                                                          | -0,004                     | -0,074                | 0,016                | 6                     | 0,006                  |
| reactome_DAPI12_interactions_Main_Pathway                                                            | -0,017                     | -0,027                | 0,021                | 21                    | 0,002                  |
| reactome_DAPI12_signaling_Main_Pathway                                                               | -0,061                     | 0,134                 | 0,008                | 26                    | -0,026                 |
| reactome_DARPP_32_events_Main_Pathway                                                                | -0,024                     | 0,031                 | -0,012               | 22                    | -0,018                 |
| reactome_DCC_mediated_attractive_signaling_Main_Pathway                                              | 0,007                      | -0,053                | 0,009                | 13                    | 0,008                  |
| reactome_Deadenylation_of_mRNA_Main_Pathway                                                          | -0,031                     | 0,099                 | -0,003               | 23                    | -0,017                 |
| reactome_degradation_of_AXIN_Main_Pathway                                                            | -0,022                     | 0,032                 | 0,016                | 54                    | -0,003                 |
| reactome_Degradation_of_beta_catenin_by_the_destruction_complex_Main_Pathway                         | 0,006                      | 0,006                 | -0,002               | 66                    | 0,002                  |
| reactome_Degradation_of_cysteine_and_homocysteine_Main_Pathway                                       | 0,094                      | -0,111                | -0,037               | 3                     | 0,029                  |
| reactome_degradation_of_DVL_Main_Pathway                                                             | -0,003                     | 0,026                 | 0,001                | 55                    | -0,001                 |
| reactome_Degradation_of_the_extracellular_matrix_Main_Pathway                                        | 0,003                      | -0,121                | 0,033                | 32                    | 0,018                  |
| reactome_Depolymerisation_of_the_Nuclear_Lamina_Main_Pathway                                         | 0,035                      | 0,049                 | 0,024                | 12                    | 0,030                  |
| reactome_Deposition_of_new_CENPA_containing_nucleosomes_at_the_centromere_Main_Pathway               | -0,005                     | 0,026                 | 0,001                | 45                    | -0,002                 |
| reactome_Dermatan_sulfate_biosynthesis_Main_Pathway                                                  | -0,010                     | 0,012                 | 0,014                | 11                    | 0,002                  |
| reactome_Detoxification_of_Reactive_Oxygen_Species_Main_Pathway                                      | -0,039                     | 0,018                 | -0,020               | 25                    | -0,029                 |
| reactome_Digestion_of_dietary_carbohydrate_Main_Pathway                                              | 0                          | 0                     | 0                    | 8                     | 0                      |
| reactome_Digestion_of_dietary_lipid_Main_Pathway                                                     | 0                          | 0                     | 0                    | 5                     | 0                      |
| reactome_Dimerization_of_procaspase_8_Main_Pathway                                                   | -0,473                     | 0,545                 | 0,008                | 9                     | -0,233                 |
| reactome_disassembly_of_the_destruction_complex_and_recruitment_of_AXIN_to_the_membrane_Main_Pathway | 0,007                      | -0,012                | 0,005                | 27                    | 0,006                  |
| reactome_Displacement_of_DNA_glycosylase_by_APE1_Main_Pathway                                        | 0,041                      | 0,112                 | -0,002               | 9                     | 0,019                  |
| reactome_Dissolution_of_Fibrin_Clot_Main_Pathway                                                     | 0,064                      | -0,229                | 0,092                | 13                    | 0,078                  |
| reactome_DNA_Damage_Telomere_Stress_Induced_Senescence_Main_Pathway                                  | -0,017                     | 0,054                 | 0,002                | 38                    | -0,008                 |
| reactome_DNA_replication_initiation_Main_Pathway                                                     | -0,088                     | 0,092                 | -0,000               | 6                     | -0,044                 |
| reactome_Dopamine_Neurotransmitter_Release_Cycle_Main_Pathway                                        | -0,001                     | 0,025                 | -0,016               | 17                    | -0,008                 |
| reactome_Dopamine_receptors_Main_Pathway                                                             | 0                          | 0                     | 0                    | 5                     | 0                      |
| reactome_Downregulation_of_ERBB2_ERBB3_signaling_Main_Pathway                                        | 0,044                      | 0,045                 | -0,021               | 9                     | 0,011                  |
| reactome_Downregulation_of_ERBB4_signaling_Main_Pathway                                              | 0,105                      | -0,038                | 0,010                | 7                     | 0,058                  |
| reactome_Downregulation_of_SMAD2_3_SMAD4_transcriptional_activity_Main_Pathway                       | 0,025                      | -0,072                | 0,031                | 23                    | 0,028                  |
| reactome_Downregulation_of_TGF_beta_receptor_signaling_Main_Pathway                                  | 0,002                      | -0,027                | 0,009                | 25                    | 0,006                  |
| reactome_Downstream_signal_transduction_Main_Pathway                                                 | 0,031                      | -0,048                | 0,037                | 22                    | 0,034                  |

| Pathway                                                                           | Tumour_MDA_MB.231_Invasive | Tumour_AU565_Invasive | Tumour_T47D_Invasive | Number of genes in PW | Mean (MDA_MB.231_T47D) |
|-----------------------------------------------------------------------------------|----------------------------|-----------------------|----------------------|-----------------------|------------------------|
| reactome_Downstream_TCR_signaling_Main_Pathway                                    | -0,015                     | 0,140                 | -0,114               | 41                    | -0,065                 |
| reactome_DSCAM_interactions_Main_Pathway                                          | -0,038                     | 0,131                 | -0,011               | 10                    | -0,024                 |
| reactome_Dual_incision_reaction_in_GG_NER_Main_Pathway                            | -0,020                     | -0,029                | 0,005                | 20                    | -0,007                 |
| reactome_Dual_incision_reaction_in_TC_NER_Main_Pathway                            | -0,010                     | -0,032                | 0,004                | 28                    | -0,003                 |
| reactome_E2F_enabled_inhibition_of_pre_replication_complex_formation_Main_Pathway | -0,046                     | 0,074                 | -0,005               | 10                    | -0,025                 |
| reactome_E2F_mediated_regulation_of_DNA_replication_Main_Pathway                  | -0,042                     | 0,094                 | 0,046                | 17                    | 0,002                  |
| reactome_Early_Phase_of_HIV_Life_Cycle_Main_Pathway                               | -0,084                     | 0,292                 | -0,004               | 3                     | -0,044                 |
| reactome_ECM_proteoglycans_Main_Pathway                                           | 0,001                      | -0,013                | 0,001                | 21                    | 0,001                  |
| reactome_Effects_of_PIP2_hydrolysis_Main_Pathway                                  | 0,016                      | -0,085                | 0,023                | 22                    | 0,019                  |
| reactome_EGFR_downregulation_Main_Pathway                                         | -0,007                     | -0,103                | 0,031                | 25                    | 0,012                  |
| reactome_EGFR_interacts_with_phospholipase_C_gamma_Main_Pathway                   | -0,129                     | -0,457                | 0,144                | 3                     | 0,008                  |
| reactome_EGFR_Transactivation_by_Gastrin_Main_Pathway                             | -0,098                     | -0,001                | 0,057                | 8                     | -0,020                 |
| reactome_Eicosanoids_Main_Pathway                                                 | 0                          | 0                     | 0                    | 12                    | 0                      |
| reactome_Elastic_fibre_formation_Main_Pathway                                     | 0,005                      | -0,128                | 0,033                | 13                    | 0,019                  |
| reactome_Electric_Transmission_Across_Gap_Junctions_Main_Pathway                  | 0,001                      | -0,006                | 0,011                | 5                     | 0,006                  |
| reactome_Elevation_of_cytosolic_Ca2_levels_Main_Pathway                           | 0,005                      | -0,030                | 0,011                | 9                     | 0,008                  |
| reactome_Elongation_arrest_and_recovery_Main_Pathway                              | -0,006                     | -0,043                | 0,004                | 31                    | -0,001                 |
| reactome_Endogenous_sterols_Main_Pathway                                          | -0,005                     | -0,097                | 0,034                | 18                    | 0,014                  |
| reactome_Endosomal_Sorting_Complex_Required_For_Transport_ESCRT_Main_Pathway      | 0,015                      | 0,046                 | -0,009               | 28                    | 0,003                  |
| reactome_Endosomal_Vacuolar_Main_Pathway                                          | -0,038                     | -0,123                | 0,079                | 14                    | 0,021                  |
| reactome_eNOS_activation_Main_Pathway                                             | -0,012                     | -0,265                | 0,095                | 7                     | 0,041                  |
| reactome_EPH_ephrin_mediated_repulsion_of_cells_Main_Pathway                      | -0,017                     | 0,088                 | -0,005               | 46                    | -0,011                 |
| reactome_EPHA_mediated_growth_cone_collapse_Main_Pathway                          | 0,038                      | 0,076                 | 0,007                | 32                    | 0,023                  |
| reactome_EPHB_mediated_forward_signaling_Main_Pathway                             | -0,024                     | 0,138                 | -0,011               | 40                    | -0,018                 |
| reactome_Ephrin_signaling_Main_Pathway                                            | 0,004                      | 0,071                 | -0,025               | 18                    | -0,011                 |
| reactome_ER_Phagosome_Main_Pathway                                                | -0,021                     | -0,016                | 0,022                | 67                    | 0,000                  |
| reactome_ER_Quality_Control_Compartment_ERQC_Main_Pathway                         | -0,046                     | -0,013                | -0,041               | 6                     | -0,043                 |
| reactome_ERK_MAPK_targets_Main_Pathway                                            | 0,018                      | -0,049                | 0,000                | 17                    | 0,009                  |
| reactome_ERK1_activation_Main_Pathway                                             | -0,007                     | 0,153                 | -0,039               | 3                     | -0,023                 |
| reactome_ERKs_are_inactivated_Main_Pathway                                        | 0,044                      | -0,082                | -0,002               | 12                    | 0,021                  |
| reactome_Erythrocytes_take_up_carbon_dioxide_and_release_oxygen_Main_Pathway      | 0                          | 0                     | 0                    | 6                     | 0                      |
| reactome_Erythrocytes_take_up_oxygen_and_release_carbon_dioxide_Main_Pathway      | 0                          | 0                     | 0                    | 6                     | 0                      |
| reactome_Establishment_of_Sister_Chromatid_Cohesion_Main_Pathway                  | -0,082                     | 0,135                 | -0,060               | 11                    | -0,071                 |
| reactome_Ethanol_oxidation_Main_Pathway                                           | -0,143                     | 0,162                 | -0,058               | 4                     | -0,100                 |
| reactome_Eukaryotic_Translation_Elongation_Main_Pathway                           | -0,047                     | 0,036                 | 0,024                | 6                     | -0,011                 |
| reactome_Eukaryotic_Translation_Termination_Main_Pathway                          | -0,004                     | 0,067                 | 0,029                | 84                    | 0,012                  |
| reactome_Extrinsic_Pathway_Main_Pathway                                           | 0                          | 0                     | 0                    | 5                     | 0                      |
| reactome_Facilitative_Na_independent_glucose_transporters_Main_Pathway            | 0                          | 0                     | 0                    | 7                     | 0                      |
| reactome_Fanconi_Anemia_Main_Pathway                                              | 0,028                      | 0,007                 | -0,030               | 17                    | -0,001                 |
| reactome_FasL_CD95L_signaling_Main_Pathway                                        | 0,076                      | -0,015                | 0,047                | 5                     | 0,061                  |
| reactome_Fatty_Acids_bound_to_GPR40_FFAR1_regulate_insulin_secretion_Main_Pathway | 0,013                      | -0,117                | 0,042                | 8                     | 0,027                  |
| reactome_Fatty_acids_Main_Pathway                                                 | 0                          | 0                     | 0                    | 15                    | 0                      |
| reactome_Fatty_Acyl_CoA_Biosynthesis_Main_Pathway                                 | -0,021                     | 0,057                 | 0,073                | 4                     | 0,026                  |
| reactome_Fc_epsilon_receptor_FCER1_signaling_Main_Pathway                         | -0,104                     | 0,802                 | -0,029               | 7                     | -0,066                 |
| reactome_FCER1_mediated_Ca2_mobilization_Main_Pathway                             | -0,042                     | 0,226                 | 0,015                | 26                    | -0,013                 |
| reactome_FCER1_mediated_MAPK_activation_Main_Pathway                              | -0,032                     | 0,274                 | 0,017                | 27                    | -0,007                 |
| reactome_FCER1_mediated_NF_kB_activation_Main_Pathway                             | 0,015                      | 0,159                 | 0,024                | 23                    | 0,019                  |
| reactome_FCGR_activation_Main_Pathway                                             | -0,044                     | 0,376                 | -0,007               | 15                    | -0,025                 |
| reactome_FGFR1b_ligand_binding_and_activation_Main_Pathway                        | 0                          | 0                     | 0                    | 5                     | 0                      |
| reactome_FGFR1c_ligand_binding_and_activation_Main_Pathway                        | 0                          | 0                     | 0                    | 7                     | 0                      |
| reactome_FGFR2b_ligand_binding_and_activation_Main_Pathway                        | 0                          | 0                     | 0                    | 5                     | 0                      |
| reactome_FGFR2c_ligand_binding_and_activation_Main_Pathway                        | 0                          | 0                     | 0                    | 9                     | 0                      |
| reactome_FGFR3b_ligand_binding_and_activation_Main_Pathway                        | 0                          | 0                     | 0                    | 4                     | 0                      |
| reactome_FGFR3c_ligand_binding_and_activation_Main_Pathway                        | 0                          | 0                     | 0                    | 8                     | 0                      |
| reactome_FGFR4_ligand_binding_and_activation_Main_Pathway                         | 0                          | 0                     | 0                    | 11                    | 0                      |

| Pathway                                                                                              | Tumour_MDA.<br>MB.231.<br>Invasive | Tumour_AU565.<br>Invasive | Tumour_T47D.<br>Invasive | Number<br>of genes<br>in PW | Mean<br>(MDA.<br>MB.231,<br>T47D) |
|------------------------------------------------------------------------------------------------------|------------------------------------|---------------------------|--------------------------|-----------------------------|-----------------------------------|
| reactome_Fibronectin_matrix_formation_Main_Pathway                                                   | 0,076                              | -0,470                    | 0,106                    | 3                           | 0,091                             |
| reactome_Ficolins_bind_to_repetitive_carbohydrate_structures_on_the_target_cell_surface_Main_Pathway | 0                                  | 0                         | 0                        | 4                           | 0                                 |
| reactome_FMO_oxidizes_nucleophiles_Main_Pathway                                                      | 0                                  | 0                         | 0                        | 3                           | 0                                 |
| reactome_Folding_of_actin_by_CCT_TriC_Main_Pathway                                                   | -0,114                             | 0,300                     | -0,061                   | 9                           | -0,087                            |
| reactome_Formation_of_a_pool_of_free_40S_subunits_Main_Pathway                                       | -0,010                             | 0,073                     | 0,025                    | 94                          | 0,008                             |
| reactome_Formation_of_annular_gap_junctions_Main_Pathway                                             | -0,058                             | -0,017                    | 0,019                    | 8                           | -0,019                            |
| reactome_Formation_of_apoptosome_Main_Pathway                                                        | -0,084                             | 0,003                     | -0,066                   | 3                           | -0,075                            |
| reactome_Formation_of_ATP_by_chemiosmotic_coupling_Main_Pathway                                      | -0,133                             | 0,016                     | -0,008                   | 18                          | -0,070                            |
| reactome_Formation_of_HIV_1_elongation_complex_containing_HIV_1_Tat_Main_Pathway                     | -0,008                             | -0,058                    | -0,005                   | 41                          | -0,007                            |
| reactome_Formation_of_HIV_elongation_complex_in_the_absence_of_HIV_Tat_Main_Pathway                  | -0,007                             | -0,064                    | -0,002                   | 42                          | -0,004                            |
| reactome_Formation_of_incision_complex_in_GG_NER_Main_Pathway                                        | -0,020                             | -0,029                    | 0,005                    | 20                          | -0,007                            |
| reactome_Formation_of_RNA_Pol_II_elongation_complex_Main_Pathway                                     | -0,007                             | -0,064                    | -0,002                   | 42                          | -0,004                            |
| reactome_Formation_of_Senescence_Associated_Heterochromatin_Foci_SAHF_Main_Pathway                   | -0,051                             | -0,022                    | 0,005                    | 16                          | -0,023                            |
| reactome_Formation_of_the_active_cofactor_UDP_glucuronate_Main_Pathway                               | -0,375                             | 0,299                     | -0,150                   | 3                           | -0,262                            |
| reactome_formation_of_the_beta_catenin_TCF_transactivating_complex_Main_Pathway                      | -0,010                             | 0,050                     | 0,008                    | 51                          | -0,001                            |
| reactome_Formation_of_the_Early_Elongation_Complex_Main_Pathway                                      | -0,014                             | -0,071                    | -0,015                   | 32                          | -0,015                            |
| reactome_Formation_of_the_HIV_1_Early_Elongation_Complex_Main_Pathway                                | -0,014                             | -0,071                    | -0,015                   | 32                          | -0,015                            |
| reactome_Formation_of_the_ternary_complex_and_subsequently_the_43S_complex_Main_Pathway              | -0,020                             | 0,104                     | 0,004                    | 48                          | -0,008                            |
| reactome_Formation_of_transcription_coupled_NER_TC_NER_repair_complex_Main_Pathway                   | -0,010                             | -0,032                    | 0,004                    | 28                          | -0,003                            |
| reactome_Formation_of_tubulin_folding_intermediates_by_CCT_TriC_Main_Pathway                         | -0,007                             | 0,036                     | -0,003                   | 20                          | -0,005                            |
| reactome_Formyl_peptide_receptors_bind_formyl_peptides_and_many_other_ligands_Main_Pathway           | 0,065                              | -0,266                    | 0,010                    | 5                           | 0,037                             |
| reactome_Free_fatty_acid_receptors_Main_Pathway                                                      | 0                                  | 0                         | 0                        | 5                           | 0                                 |
| reactome_Frs2_mediated_activation_Main_Pathway                                                       | 0,008                              | -0,124                    | 0,041                    | 9                           | 0,025                             |
| reactome_FRS2_mediated_cascade_Main_Pathway                                                          | -0,029                             | 0,112                     | -0,002                   | 22                          | -0,016                            |
| reactome_G_alpha_12_13_signalling_events_Main_Pathway                                                | -0,013                             | 0,021                     | -0,005                   | 74                          | -0,009                            |
| reactome_G_alpha_i_signalling_events_Main_Pathway                                                    | 0,001                              | -0,018                    | 0,011                    | 218                         | 0,006                             |
| reactome_G_alpha_q_signalling_events_Main_Pathway                                                    | -0,001                             | -0,023                    | 0,006                    | 161                         | 0,003                             |
| reactome_G_alpha_s_signalling_events_Main_Pathway                                                    | -0,005                             | -0,001                    | 0,001                    | 121                         | -0,002                            |
| reactome_G_alpha_z_signalling_events_Main_Pathway                                                    | -0,011                             | -0,017                    | 0,004                    | 43                          | -0,003                            |
| reactome_G_beta_gamma_signalling_through_PI3Kgamma_Main_Pathway                                      | -0,024                             | -0,029                    | 0,011                    | 25                          | -0,007                            |
| reactome_G_beta_gamma_signalling_through_PLC_beta_Main_Pathway                                       | -0,018                             | -0,065                    | 0,026                    | 20                          | 0,004                             |
| reactome_G_protein_activation_Main_Pathway                                                           | -0,029                             | -0,047                    | 0,019                    | 28                          | -0,005                            |
| reactome_G0_and_Early_G1_Main_Pathway                                                                | -0,024                             | 0,049                     | -0,002                   | 20                          | -0,013                            |
| reactome_G1_S_Specific_Transcription_Main_Pathway                                                    | -0,042                             | 0,094                     | 0,046                    | 17                          | 0,002                             |
| reactome_G2_M_DNA_damage_checkpoint_Main_Pathway                                                     | -0,103                             | 0,024                     | -0,039                   | 4                           | -0,071                            |
| reactome_G2_M_DNA_replication_checkpoint_Main_Pathway                                                | 0,074                              | 0,048                     | -0,004                   | 5                           | 0,035                             |
| reactome_G2_Phase_Main_Pathway                                                                       | 0,032                              | -0,005                    | 0,022                    | 5                           | 0,027                             |
| reactome_GAB1_signalsome_Main_Pathway                                                                | -0,056                             | -0,110                    | 0,065                    | 9                           | 0,005                             |
| reactome_GABA_A_rho_receptor_activation_Main_Pathway                                                 | 0                                  | 0                         | 0                        | 3                           | 0                                 |
| reactome_GABA_synthesis_release_reuptake_and_degradation_Main_Pathway                                | -0,035                             | 0,103                     | -0,038                   | 10                          | -0,036                            |
| reactome_Galactose_catabolism_Main_Pathway                                                           | 0,115                              | -0,221                    | 0,175                    | 3                           | 0,145                             |
| reactome_Gamma_carboxylation_of_protein_precursors_Main_Pathway                                      | -0,019                             | -0,027                    | 0,009                    | 9                           | -0,005                            |
| reactome_Gap_junction_assembly_Main_Pathway                                                          | -0,008                             | -0,008                    | -0,018                   | 19                          | -0,013                            |
| reactome_Gap_junction_degradation_Main_Pathway                                                       | -0,056                             | -0,044                    | 0,021                    | 9                           | -0,017                            |
| reactome_Gastrin_CREB_signalling_pathway_via_PKC_and_MAPK_Main_Pathway                               | -0,001                             | 0,069                     | -0,010                   | 7                           | -0,005                            |
| reactome_Generation_of_second_messenger_molecules_Main_Pathway                                       | -0,052                             | 0,239                     | -0,172                   | 32                          | -0,112                            |
| reactome_Glucagon_like_Peptide_1_GLP1_regulates_insulin_secretion_Main_Pathway                       | -0,028                             | -0,013                    | 0,005                    | 39                          | -0,011                            |
| reactome_Glucagon_signaling_in_metabolic_regulation_Main_Pathway                                     | -0,026                             | -0,032                    | 0,012                    | 26                          | -0,007                            |
| reactome_Glucagon_type_ligand_receptors_Main_Pathway                                                 | -0,031                             | -0,038                    | 0,014                    | 22                          | -0,008                            |
| reactome_Glucocorticoid_biosynthesis_Main_Pathway                                                    | 0                                  | 0                         | 0                        | 6                           | 0                                 |
| reactome_Gluconeogenesis_Main_Pathway                                                                | -0,062                             | 0,121                     | -0,044                   | 19                          | -0,053                            |

| Pathway                                                                                              | Tumour_MDA_MB.231_Invasive | Tumour_AU565_Invasive | Tumour_T47D_Invasive | Number of genes in PW | Mean (MDA_MB.231_T47D) |
|------------------------------------------------------------------------------------------------------|----------------------------|-----------------------|----------------------|-----------------------|------------------------|
| reactome_Glucose_transport_Main_Pathway                                                              | -0,082                     | 0,124                 | -0,013               | 10                    | -0,047                 |
| reactome_Glucuronidation_Main_Pathway                                                                | 0                          | 0                     | 0                    | 16                    | 0                      |
| reactome_Glutamate_Neurotransmitter_Release_Cycle_Main_Pathway                                       | -0,023                     | 0,042                 | -0,027               | 18                    | -0,025                 |
| reactome_Glutathione_synthesis_and_recycling_Main_Pathway                                            | -0,030                     | 0,135                 | -0,006               | 6                     | -0,018                 |
| reactome_Glycogen_breakdown_glycogenolysis_Main_Pathway                                              | 0,001                      | -0,001                | -0,018               | 12                    | -0,008                 |
| reactome_Glycogen_synthesis_Main_Pathway                                                             | 0,042                      | 0,015                 | 0,004                | 13                    | 0,023                  |
| reactome_Glycolysis_Main_Pathway                                                                     | 0,039                      | -0,038                | -0,028               | 9                     | 0,005                  |
| reactome_Glycoprotein_hormones_Main_Pathway                                                          | 0                          | 0                     | 0                    | 10                    | 0                      |
| reactome_Glycosphingolipid_metabolism_Main_Pathway                                                   | -0,044                     | 0,049                 | -0,035               | 35                    | -0,039                 |
| reactome_Glyoxylate_metabolism_Main_Pathway                                                          | 0                          | 0                     | 0                    | 5                     | 0                      |
| reactome_Golgi_Associated_Vesicle_Biogenesis_Main_Pathway                                            | -0,013                     | -0,001                | 0,018                | 45                    | 0,002                  |
| reactome_Golgi_Cisternae_Pericentriolar_Stack_Reorganization_Main_Pathway                            | 0,020                      | -0,103                | 0,034                | 9                     | 0,027                  |
| reactome_GP1b_IX_V_activation_signalling_Main_Pathway                                                | 0,049                      | -0,060                | 0,025                | 9                     | 0,037                  |
| reactome_GPVI_mediated_activation_cascade_Main_Pathway                                               | -0,030                     | 0,250                 | -0,018               | 30                    | -0,024                 |
| reactome_GRB2_events_in_EGFR_signaling_Main_Pathway                                                  | -0,125                     | -0,011                | 0,070                | 6                     | -0,028                 |
| reactome_GRB2_events_in_ERBB2_signaling_Main_Pathway                                                 | -0,102                     | 0,370                 | -0,007               | 4                     | -0,055                 |
| reactome_GRB2_SOS_provides_linkage_to_MAPK_signaling_for_Integrins_Main_Pathway                      | 0,020                      | -0,066                | 0,026                | 13                    | 0,023                  |
| reactome_Growth_hormone_receptor_signaling_Main_Pathway                                              | 0,002                      | 0,183                 | -0,008               | 21                    | -0,003                 |
| reactome_GTP_hydrolysis_and_joining_of_the_60S_ribosomal_subunit_Main_Pathway                        | -0,012                     | 0,072                 | 0,022                | 105                   | 0,005                  |
| reactome_HATs_acetylate_histones_Main_Pathway                                                        | -0,005                     | 0,031                 | 0,007                | 79                    | 0,001                  |
| reactome_HDACs_deacetylate_histones_Main_Pathway                                                     | -0,004                     | -0,012                | 0,021                | 36                    | 0,009                  |
| reactome_HDL_mediated_lipid_transport_Main_Pathway                                                   | -0,013                     | -0,017                | -0,021               | 12                    | -0,017                 |
| reactome_HDMs_demethylate_histones_Main_Pathway                                                      | -0,067                     | 0,047                 | -0,016               | 23                    | -0,042                 |
| reactome_Hedgehog_ligand_biogenesis_Main_Pathway                                                     | -0,020                     | 0,018                 | 0,000                | 59                    | -0,010                 |
| reactome_Heme_biosynthesis_Main_Pathway                                                              | -0,031                     | -0,005                | 0,045                | 9                     | 0,007                  |
| reactome_Heme_degradation_Main_Pathway                                                               | 0,041                      | -0,149                | 0,056                | 5                     | 0,048                  |
| reactome_Hexose_uptake_Main_Pathway                                                                  | 0                          | 0                     | 0                    | 7                     | 0                      |
| reactome_Hh_ligand_biogenesis_disease_Main_Pathway                                                   | -0,021                     | 0,019                 | 0,002                | 55                    | -0,010                 |
| reactome_Histamine_receptors_Main_Pathway                                                            | 0                          | 0                     | 0                    | 4                     | 0                      |
| reactome_Histidine_catabolism_Main_Pathway                                                           | 0                          | 0                     | 0                    | 5                     | 0                      |
| reactome_HIV_elongation_arrest_and_recovery_Main_Pathway                                             | -0,006                     | -0,043                | 0,004                | 31                    | -0,001                 |
| reactome_HIV_Transcription_Initiation_Main_Pathway                                                   | -0,041                     | 0,016                 | -0,040               | 43                    | -0,040                 |
| reactome_Hormone_sensitive_lipase_HSL_mediated_triacylglycerol_hydrolysis_Main_Pathway               | -0,066                     | -0,083                | 0,015                | 12                    | -0,026                 |
| reactome_HS_GAG_biosynthesis_Main_Pathway                                                            | -0,025                     | 0,039                 | -0,012               | 31                    | -0,019                 |
| reactome_HS_GAG_degradation_Main_Pathway                                                             | -0,038                     | 0,045                 | -0,015               | 14                    | -0,026                 |
| reactome_HSF1_activation_Main_Pathway                                                                | -0,057                     | 0,099                 | 0,007                | 10                    | -0,025                 |
| reactome_HSF1_dependent_transactivation_Main_Pathway                                                 | -0,030                     | 0,122                 | -0,031               | 16                    | -0,030                 |
| reactome_HuR_stabilizes_mRNA_Main_Pathway                                                            | -0,034                     | 0,044                 | -0,019               | 8                     | -0,027                 |
| reactome_Hyaluronan_biosynthesis_and_export_Main_Pathway                                             | 0                          | 0                     | 0                    | 4                     | 0                      |
| reactome_Hyaluronan_uptake_and_degradation_Main_Pathway                                              | -0,022                     | -0,268                | 0,072                | 10                    | 0,025                  |
| reactome_Hydrolysis_of_LPC_Main_Pathway                                                              | 0,046                      | -0,079                | 0,043                | 8                     | 0,045                  |
| reactome_Hydroxycarboxylic_acid_binding_receptors_Main_Pathway                                       | 0                          | 0                     | 0                    | 3                     | 0                      |
| reactome_Hypusinylation_Main_Pathway                                                                 | 0,012                      | 0,073                 | -0,026               | 4                     | -0,007                 |
| reactome_IKK_complex_recruitment_mediated_by_RIP1_Main_Pathway                                       | -0,001                     | -0,074                | 0,068                | 5                     | 0,034                  |
| reactome_Inactivation_of_APC_C_via_direct_inhibition_of_the_APC_C_complex_Main_Pathway               | -0,011                     | 0,018                 | -0,002               | 18                    | -0,007                 |
| reactome_Inactivation_of_Cdc42_and_Rac_Main_Pathway                                                  | -0,055                     | -0,051                | 0,087                | 9                     | 0,016                  |
| reactome_Inflammasomes_Main_Pathway                                                                  | 0,121                      | -0,458                | 0,211                | 3                     | 0,166                  |
| reactome_Inhibition_of_replication_initiation_of_damaged_DNA_by_RB1_E2F1_Main_Pathway                | -0,030                     | 0,047                 | 0,000                | 12                    | -0,015                 |
| reactome_Inhibition_of_TSC_complex_formation_by_PKB_Main_Pathway                                     | 0,032                      | -0,002                | -0,018               | 3                     | 0,007                  |
| reactome_Inhibition_of_voltage_gated_Ca2_channels_via_Gbeta_gamma_subunits_Main_Pathway              | -0,038                     | -0,052                | 0,023                | 15                    | -0,008                 |
| reactome_Initial_triggering_of_complement_Main_Pathway                                               | 0,005                      | -0,010                | 0,002                | 12                    | 0,003                  |
| reactome_Initiation_of_Nuclear_Envelope_Reformation_Main_Pathway                                     | 0,084                      | 0,060                 | 0,010                | 9                     | 0,047                  |
| reactome_Inositol_transporters_Main_Pathway                                                          | 0                          | 0                     | 0                    | 7                     | 0                      |
| reactome_Insulin_like_Growth_Factor_2_mRNA_Binding_Proteins_IGF2BPs_IMP_VICKZs_bind_RNA_Main_Pathway | -0,045                     | 0,166                 | -0,080               | 3                     | -0,062                 |



| Pathway                                                                                                      | Tumour_MDA_MB.231_Invasive | Tumour_AU565_Invasive | Tumour_T47D_Invasive | Number of genes in PW | Mean (MDA_MB.231_T47D) |
|--------------------------------------------------------------------------------------------------------------|----------------------------|-----------------------|----------------------|-----------------------|------------------------|
| reactome_Insulin_processing_Main_Pathway                                                                     | 0,015                      | -0,035                | 0,005                | 18                    | 0,010                  |
| reactome_Insulin_receptor_recycling_Main_Pathway                                                             | -0,073                     | 0,086                 | -0,030               | 26                    | -0,051                 |
| reactome_Integration_of_energy_metabolism_Main_Pathway                                                       | 0,063                      | -0,145                | -0,014               | 5                     | 0,024                  |
| reactome_Integration_of_provirus_Main_Pathway                                                                | -0,120                     | 0,321                 | -0,168               | 4                     | -0,144                 |
| reactome_Integration_of_viral_DNA_into_host_genomic_DNA_Main_Pathway                                         | -0,109                     | 0,300                 | -0,206               | 3                     | -0,157                 |
| reactome_Integrin_alpha5_beta3_signaling_Main_Pathway                                                        | -0,025                     | 0,028                 | 0,004                | 20                    | -0,011                 |
| reactome_Integrin_cell_surface_interactions_Main_Pathway                                                     | 0,002                      | -0,092                | 0,028                | 45                    | 0,015                  |
| reactome_Interaction_With_The_Zona_Pellucida_Main_Pathway                                                    | 0,007                      | 0,006                 | -0,006               | 10                    | 0,000                  |
| reactome_Interconversion_of_2-oxoglutarate_and_2-hydroxyglutarate_Main_Pathway                               | -0,097                     | 0,080                 | 0,003                | 3                     | -0,047                 |
| reactome_Interconversion_of_polyamines_Main_Pathway                                                          | -1,535                     | 1,243                 | -0,023               | 3                     | -0,779                 |
| reactome_Interferon_alpha_beta_signaling_Main_Pathway                                                        | 0,011                      | -0,088                | -0,002               | 60                    | 0,004                  |
| reactome_Interferon_gamma_signaling_Main_Pathway                                                             | 0,018                      | -0,079                | 0,000                | 66                    | 0,009                  |
| reactome_Interleukin_1_processing_Main_Pathway                                                               | 0,052                      | -0,196                | 0,090                | 7                     | 0,071                  |
| reactome_Interleukin_1_signaling_Main_Pathway                                                                | 0,020                      | -0,040                | 0,026                | 35                    | 0,023                  |
| reactome_Interleukin_2_signaling_Main_Pathway                                                                | -0,059                     | 0,026                 | -0,015               | 12                    | -0,037                 |
| reactome_Interleukin_6_signaling_Main_Pathway                                                                | 0,040                      | -0,223                | -0,003               | 6                     | 0,019                  |
| reactome_Interleukin_7_signaling_Main_Pathway                                                                | 0,022                      | -0,109                | 0,004                | 11                    | 0,013                  |
| reactome_Interleukin_receptor_SHC_signaling_Main_Pathway                                                     | -0,029                     | -0,004                | -0,004               | 13                    | -0,017                 |
| reactome_Intrinsic_Pathway_Main_Pathway                                                                      | -0,019                     | -0,015                | -0,020               | 17                    | -0,019                 |
| reactome_Ion_transport_by_P_type_ATPases_Main_Pathway                                                        | -0,023                     | -0,025                | -0,003               | 42                    | -0,013                 |
| reactome_IRAK1_recruits_IKK_complex_Main_Pathway                                                             | -0,029                     | 0,059                 | 0,014                | 10                    | -0,008                 |
| reactome_IRAK1_recruits_IKK_complex_upon_TLR7_8_or_9_stimulation_Main_Pathway                                | -0,029                     | 0,059                 | 0,014                | 10                    | -0,008                 |
| reactome_IRAK2_mediated_activation_of_TAK1_complex_Main_Pathway                                              | 0,057                      | -0,007                | 0,009                | 10                    | 0,033                  |
| reactome_IRAK2_mediated_activation_of_TAK1_complex_upon_TLR7_8_or_9_stimulation_Main_Pathway                 | 0,057                      | -0,007                | 0,009                | 10                    | 0,033                  |
| reactome_IRF3_mediated_activation_of_type_1_IFN_Main_Pathway                                                 | 0,047                      | -0,047                | 0,013                | 5                     | 0,030                  |
| reactome_IRF3_mediated_induction_of_type_1_IFN_Main_Pathway                                                  | -0,017                     | 0,131                 | -0,045               | 12                    | -0,031                 |
| reactome_Iron_uptake_and_transport_Main_Pathway                                                              | 0,124                      | -0,210                | 0,025                | 13                    | 0,075                  |
| reactome_IRS_activation_Main_Pathway                                                                         | 0,076                      | -0,079                | -0,027               | 5                     | 0,025                  |
| reactome_IRS_related_events_triggered_by_IGF1R_Main_Pathway                                                  | 0,063                      | -0,066                | -0,022               | 6                     | 0,021                  |
| reactome_ISG15_antiviral_mechanism_Main_Pathway                                                              | -0,068                     | -0,053                | 0,011                | 67                    | -0,028                 |
| reactome_JNK_c-Jun_kinases_phosphorylation_and_activation_mediated_by_activated_human_TAK1_Main_Pathway      | 0,148                      | -0,322                | 0,114                | 5                     | 0,131                  |
| reactome_Keratan_sulfate_biosynthesis_Main_Pathway                                                           | 0,003                      | -0,006                | 0,007                | 22                    | 0,005                  |
| reactome_Keratan_sulfate_degradation_Main_Pathway                                                            | -0,029                     | 0,036                 | -0,031               | 10                    | -0,030                 |
| reactome_Ketone_body_catabolism_Main_Pathway                                                                 | -0,085                     | 0,192                 | -0,112               | 3                     | -0,099                 |
| reactome_Kinesins_Main_Pathway                                                                               | 0,058                      | -0,128                | 0,058                | 22                    | 0,058                  |
| reactome_KSRP_destabilizes_mRNA_Main_Pathway                                                                 | 0,005                      | 0,086                 | -0,027               | 17                    | -0,011                 |
| reactome_L13a_mediated_translational_silencing_of_Ceruloplasmin_expression_Main_Pathway                      | -0,011                     | 0,074                 | 0,023                | 104                   | 0,006                  |
| reactome_L1CAM_interactions_Main_Pathway                                                                     | 0,023                      | 0,011                 | 0,028                | 11                    | 0,026                  |
| reactome_Laminin_interactions_Main_Pathway                                                                   | -0,011                     | -0,180                | 0,044                | 14                    | 0,017                  |
| reactome_LDL_endocytosis_Main_Pathway                                                                        | -0,029                     | 0,038                 | -0,019               | 6                     | -0,024                 |
| reactome_Leading_Strand_Synthesis_Main_Pathway                                                               | -0,080                     | 0,209                 | -0,035               | 9                     | -0,057                 |
| reactome_Leukotriene_receptors_Main_Pathway                                                                  | 0                          | 0                     | 0                    | 5                     | 0                      |
| reactome_Ligand_gated_ion_channel_transport_Main_Pathway                                                     | 0                          | 0                     | 0                    | 13                    | 0                      |
| reactome_Linoleic_acid_LA_metabolism_Main_Pathway                                                            | -0,006                     | -0,091                | 0,020                | 6                     | 0,007                  |
| reactome_Loss_of_Nlp_from_mitotic_centrosomes_Main_Pathway                                                   | 0,002                      | -0,040                | 0,022                | 60                    | 0,012                  |
| reactome_Loss_of_proteins_required_for_interphase_microtubule_organizationA_from_the_centrosome_Main_Pathway | 0,002                      | -0,040                | 0,022                | 60                    | 0,012                  |
| reactome_LRR_FLII_interacting_protein_1_LRRFIP1_activates_type_1_IFN_production_Main_Pathway                 | 0,028                      | 0,065                 | 0,095                | 5                     | 0,061                  |
| reactome_Lysine_catabolism_Main_Pathway                                                                      | -0,097                     | -0,095                | -0,009               | 8                     | -0,053                 |
| reactome_Lysosome_Vesicle_Biogenesis_Main_Pathway                                                            | -0,064                     | 0,038                 | -0,010               | 22                    | -0,037                 |
| reactome_Lysosphingolipid_and_LPA_receptors_Main_Pathway                                                     | 0                          | 0                     | 0                    | 9                     | 0                      |
| reactome_Meiotic_recombination_Main_Pathway                                                                  | -0,004                     | 0,027                 | 0,000                | 54                    | -0,002                 |
| reactome_Meiotic_synapsis_Main_Pathway                                                                       | -0,012                     | 0,027                 | -0,008               | 55                    | -0,010                 |
| reactome_MEK_activation_Main_Pathway                                                                         | -0,028                     | 0,259                 | -0,031               | 7                     | -0,029                 |

| Pathway                                                                                          | Tumour_MDA_MB.231_Invasive | Tumour_AU565_Invasive | Tumour_T47D_Invasive | Number of genes in PW | Mean (MDA_MB.231_T47D) |
|--------------------------------------------------------------------------------------------------|----------------------------|-----------------------|----------------------|-----------------------|------------------------|
| reactome_Membrane_binding_and_targetting_of_GAG_proteins_Main_Pathway                            | -0,002                     | 0,082                 | -0,029               | 11                    | -0,015                 |
| reactome_Metabolism_of_Angiotensinogen_to_Angiotensins_Main_Pathway                              | -0,006                     | 0,023                 | 0,001                | 16                    | -0,002                 |
| reactome_Metabolism_of_folate_and_pterines_Main_Pathway                                          | 0,023                      | -0,077                | 0,042                | 8                     | 0,033                  |
| reactome_Metabolism_of_polyamines_Main_Pathway                                                   | 0,013                      | 0,072                 | -0,013               | 4                     | -0,000                 |
| reactome_Metal_ion_SLC_transporters_Main_Pathway                                                 | -0,021                     | 0,644                 | -0,022               | 8                     | -0,022                 |
| reactome_Methionine_salvage_Main_Pathway                                                         | -0,077                     | 0,374                 | -0,032               | 6                     | -0,054                 |
| reactome_Methylation_Main_Pathway                                                                | -0,024                     | 0,115                 | 0,159                | 7                     | 0,068                  |
| reactome_MHC_class_II_antigen_presentation_Main_Pathway                                          | -0,023                     | 0,062                 | -0,053               | 93                    | -0,038                 |
| reactome_MicroRNA_miRNA_biogenesis_Main_Pathway                                                  | -0,001                     | 0,016                 | -0,008               | 11                    | -0,005                 |
| reactome_Mineralocorticoid_biosynthesis_Main_Pathway                                             | 0                          | 0                     | 0                    | 5                     | 0                      |
| reactome_Miscellaneous_substrates_Main_Pathway                                                   | -0,022                     | 0,027                 | -0,008               | 12                    | -0,015                 |
| reactome_Mismatch_repair_MMR_directed_by_MSH2_MSH3_MutSbeta_Main_Pathway                         | -0,068                     | 0,180                 | -0,012               | 14                    | -0,040                 |
| reactome_Mismatch_repair_MMR_directed_by_MSH2_MSH6_MutSalpha_Main_Pathway                        | -0,065                     | 0,175                 | -0,013               | 14                    | -0,039                 |
| reactome_misspliced_LRP5_mutants_have_enhanced_beta_catenin_dependent_signaling_Main_Pathway     | -0,029                     | -0,107                | 0,111                | 8                     | 0,041                  |
| reactome_mitochondrial_fatty_acid_beta_oxidation_of_unsaturated_fatty_acids_Main_Pathway         | -0,142                     | -0,050                | -0,066               | 6                     | -0,104                 |
| reactome_Mitochondrial_iron_sulfur_cluster_biogenesis_Main_Pathway                               | -0,059                     | -0,046                | 0,001                | 4                     | -0,029                 |
| reactome_Mitochondrial_transcription_initiation_Main_Pathway                                     | -0,256                     | 0,211                 | -0,099               | 3                     | -0,178                 |
| reactome_Mitochondrial_tRNA_aminoacylation_Main_Pathway                                          | -0,083                     | 0,067                 | -0,010               | 21                    | -0,047                 |
| reactome_Mitotic_Prometaphase_Main_Pathway                                                       | 0,006                      | -0,004                | 0,016                | 85                    | 0,011                  |
| reactome_Molecules_associated_with_elastic_fibres_Main_Pathway                                   | 0,004                      | 0,012                 | -0,002               | 22                    | 0,001                  |
| reactome_Molybdenum_cofactor_biosynthesis_Main_Pathway                                           | 0,257                      | 0,211                 | -0,157               | 4                     | 0,050                  |
| reactome_mRNA_3_end_processing_Main_Pathway                                                      | -0,061                     | 0,137                 | -0,021               | 33                    | -0,041                 |
| reactome_mRNA_Capping_Main_Pathway                                                               | -0,026                     | -0,006                | -0,022               | 28                    | -0,024                 |
| reactome_mRNA_decay_by_3_to_5_exoribonuclease_Main_Pathway                                       | -0,011                     | 0,162                 | -0,059               | 11                    | -0,035                 |
| reactome_mRNA_decay_by_5_to_3_exoribonuclease_Main_Pathway                                       | -0,066                     | 0,144                 | -0,013               | 15                    | -0,039                 |
| reactome_mTOR_signalling_Main_Pathway                                                            | -0,008                     | 0,186                 | 0,018                | 4                     | 0,005                  |
| reactome_Multifunctional_anion_exchangers_Main_Pathway                                           | 0                          | 0                     | 0                    | 7                     | 0                      |
| reactome_Muscarinic_acetylcholine_receptors_Main_Pathway                                         | 0                          | 0                     | 0                    | 5                     | 0                      |
| reactome_MyD88_cascade_initiated_on_plasma_membrane_Main_Pathway                                 | -0,052                     | 0,057                 | -0,059               | 7                     | -0,056                 |
| reactome_MyD88_dependent_cascade_initiated_on_endosome_Main_Pathway                              | -0,073                     | 0,079                 | -0,083               | 5                     | -0,078                 |
| reactome_MyD88_independent_cascade_Main_Pathway                                                  | 0                          | 0                     | 0                    | 6                     | 0                      |
| reactome_N_Glycan_antennae_elongation_Main_Pathway                                               | -0,022                     | 0,038                 | 0,007                | 9                     | -0,008                 |
| reactome_N_glycan_trimming_in_the_ER_and_Calnexin_Calreticulin_cycle_Main_Pathway                | -0,090                     | -0,213                | 0,020                | 4                     | -0,035                 |
| reactome_Na_Cl_dependent_neurotransmitter_transporters_Main_Pathway                              | 0                          | 0                     | 0                    | 19                    | 0                      |
| reactome_Na_dependent_glucose_transporters_Main_Pathway                                          | 0                          | 0                     | 0                    | 6                     | 0                      |
| reactome_NADE_modulates_death_signalling_Main_Pathway                                            | -0,074                     | 0,142                 | -0,035               | 6                     | -0,055                 |
| reactome_NCAM_signaling_for_neurite_out_growth_Main_Pathway                                      | -0,030                     | 0,077                 | 0,041                | 17                    | 0,006                  |
| reactome_NCAM1_interactions_Main_Pathway                                                         | -0,015                     | 0,049                 | -0,002               | 32                    | -0,008                 |
| reactome_Nectin_Nect1_trans_heterodimerization_Main_Pathway                                      | 0,011                      | -0,116                | 0,024                | 7                     | 0,017                  |
| reactome_Nef_and_signal_transduction_Main_Pathway                                                | -0,102                     | 0,242                 | -0,046               | 7                     | -0,074                 |
| reactome_Nef_Mediated_CD4_Down_regulation_Main_Pathway                                           | -0,131                     | 0,177                 | -0,043               | 9                     | -0,087                 |
| reactome_Nef_Mediated_CD8_Down_regulation_Main_Pathway                                           | -0,127                     | 0,074                 | -0,026               | 7                     | -0,076                 |
| reactome_Nef_mediated_downregulation_of_MHC_class_I_complex_cell_surface_expression_Main_Pathway | -0,024                     | 0,003                 | 0,042                | 10                    | 0,009                  |
| reactome_Negative_regulation_of_FGFR_signaling_Main_Pathway                                      | 0,015                      | 0,018                 | -0,000               | 22                    | 0,008                  |
| reactome_negative_regulation_of_TCF_dependent_signaling_by_DVL_interacting_proteins_Main_Pathway | -0,049                     | 0,024                 | -0,003               | 5                     | -0,026                 |
| reactome_negative_regulation_of_TCF_dependent_signaling_by_WNT_ligand_antagonists_Main_Pathway   | -0,010                     | -0,032                | 0,016                | 8                     | 0,003                  |
| reactome_Negative_regulation_of_the_P13K_AKT_network_Main_Pathway                                | -0,018                     | 0,054                 | -0,022               | 8                     | -0,020                 |
| reactome_Negative_regulators_of_RIG_I_MDA5_signaling_Main_Pathway                                | 0,025                      | 0,001                 | -0,002               | 21                    | 0,012                  |
| reactome_NEP_NS2_Interacts_with_the_Cellular_Export_Machinery_Main_Pathway                       | -0,074                     | -0,027                | 0,012                | 26                    | -0,031                 |
| reactome_Nephrin_interactions_Main_Pathway                                                       | 0,095                      | -0,176                | 0,065                | 20                    | 0,080                  |
| reactome_Netrin_mediated_repulsion_signals_Main_Pathway                                          | 0                          | 0                     | 0                    | 6                     | 0                      |

| Pathway                                                                                           | Tumour_MDA_MB.231_Invasive | Tumour_AU565_Invasive | Tumour_T47D_Invasive | Number of genes in PW | Mean (MDA_MB.231_T47D) |
|---------------------------------------------------------------------------------------------------|----------------------------|-----------------------|----------------------|-----------------------|------------------------|
| reactome_Neurofascin_interactions_Main_Pathway                                                    | 0,046                      | -0,006                | -0,004               | 7                     | 0,021                  |
| reactome_Neurotransmitter_Clearance_In_The_Synaptic_Cleft_Main_Pathway                            | 0                          | 0                     | 0                    | 4                     | 0                      |
| reactome_NF_kB_activation_through_FADD_RIP_1_pathway_mediated_by_caspase_8_and_10_Main_Pathway    | 0,033                      | -0,037                | 0,081                | 8                     | 0,057                  |
| reactome_NF_kB_is_activated_and_signals_survival_Main_Pathway                                     | 0,034                      | 0,031                 | 0,022                | 13                    | 0,028                  |
| reactome_NGF_independant_TRKA_activation_Main_Pathway                                             | 0,016                      | -0,274                | 0,075                | 5                     | 0,045                  |
| reactome_NGF_processing_Main_Pathway                                                              | 0                          | 0                     | 0                    | 4                     | 0                      |
| reactome_NICD_traffics_to_nucleus_Main_Pathway                                                    | 0,004                      | 0,018                 | 0,025                | 13                    | 0,014                  |
| reactome_Nicotinamide_salvaging_Main_Pathway                                                      | 0,071                      | -0,074                | 0,024                | 5                     | 0,047                  |
| reactome_Nicotinate_metabolism_Main_Pathway                                                       | -0,035                     | -0,149                | 0,006                | 6                     | -0,014                 |
| reactome_Nitric_oxide_stimulates_guanylate_cyclase_Main_Pathway                                   | -0,010                     | -0,004                | -0,004               | 7                     | -0,007                 |
| reactome_NOD1_2_Signaling_Pathway_Main_Pathway                                                    | 0,038                      | -0,021                | 0,027                | 29                    | 0,033                  |
| reactome_Non_integrin_membrane_ECM_interactions_Main_Pathway                                      | -0,010                     | -0,031                | 0,008                | 8                     | -0,001                 |
| reactome_Nonhomologous_End_joining_NHEJ_Main_Pathway                                              | -0,022                     | 0,039                 | -0,037               | 5                     | -0,029                 |
| reactome_Nonsense_Mediated_Decay_NMD_enhanced_by_the_Exon_Junction_Complex_EJC_Main_Pathway       | -0,004                     | 0,057                 | 0,021                | 106                   | 0,009                  |
| reactome_Nonsense_Mediated_Decay_NMD_independent_of_the_Exon_Junction_Complex_EJC_Main_Pathway    | -0,008                     | 0,070                 | 0,027                | 89                    | 0,010                  |
| reactome_NoRC_negatively_regulates_rRNA_expression_Main_Pathway                                   | -0,015                     | 0,007                 | 0,001                | 72                    | -0,007                 |
| reactome_Norepinephrine_Neurotransmitter_Release_Cycle_Main_Pathway                               | -0,001                     | 0,025                 | -0,016               | 17                    | -0,008                 |
| reactome_NOSTRIN_mediated_eNOS_trafficking_Main_Pathway                                           | -0,037                     | -0,401                | 0,180                | 5                     | 0,072                  |
| reactome_Notch_HLH_transcription_Main_Pathway                                                     | 0,004                      | 0,018                 | 0,025                | 13                    | 0,014                  |
| reactome_NOTCH1_intracellular_Domain_Regulates_Transcription_Main_Pathway                         | 0,009                      | 0,006                 | 0,025                | 42                    | 0,017                  |
| reactome_NOTCH2_Activation_and_Transmission_of_Signal_to_the_Nucleus_Main_Pathway                 | -0,009                     | -0,026                | -0,013               | 21                    | -0,011                 |
| reactome_NOTCH2_intracellular_domain_regulates_transcription_Main_Pathway                         | -0,004                     | 0,111                 | 0,019                | 12                    | 0,008                  |
| reactome_NRAGE_signals_death_through_JNK_Main_Pathway                                             | 0,010                      | -0,008                | -0,001               | 45                    | 0,004                  |
| reactome_NrCAM_interactions_Main_Pathway                                                          | 0,026                      | -0,014                | -0,074               | 7                     | -0,024                 |
| reactome_NRIF_signals_cell_death_from_the_nucleus_Main_Pathway                                    | 0,059                      | -0,047                | 0,025                | 15                    | 0,042                  |
| reactome_Nuclear_import_of_Rev_protein_Main_Pathway                                               | -0,061                     | -0,020                | 0,013                | 28                    | -0,024                 |
| reactome_Nuclear_Pore_Complex_NPC_Disassembly_Main_Pathway                                        | -0,069                     | -0,028                | 0,019                | 27                    | -0,025                 |
| reactome_Nuclear_Receptor_transcription_Main_Pathway                                              | -0,016                     | -0,002                | -0,002               | 38                    | -0,009                 |
| reactome_Nuclear_signaling_by_ERBB4_Main_Pathway                                                  | -0,012                     | -0,085                | 0,035                | 17                    | 0,011                  |
| reactome_O_glycosylation_of_TSR_domain_containing_proteins_Main_Pathway                           | 0,001                      | -0,004                | 0,000                | 38                    | 0,001                  |
| reactome_O_linked_glycosylation_of_mucins_Main_Pathway                                            | -0,004                     | 0,031                 | -0,004               | 53                    | -0,004                 |
| reactome_Olfactory_Signaling_Pathway_Main_Pathway                                                 | -0,001                     | 0,000                 | -0,000               | 375                   | -0,000                 |
| reactome_Oncogene_Induced_Senesence_Main_Pathway                                                  | 0,002                      | 0,059                 | -0,032               | 22                    | -0,015                 |
| reactome_Opioid_Signalling_Main_Pathway                                                           | 0                          | 0                     | 0                    | 3                     | 0                      |
| reactome_Opsins_Main_Pathway                                                                      | 0                          | 0                     | 0                    | 9                     | 0                      |
| reactome_Orc1_removal_from_chromatin_Main_Pathway                                                 | -0,019                     | 0,039                 | -0,001               | 70                    | -0,010                 |
| reactome_Organic_anion_transport_Main_Pathway                                                     | 0                          | 0                     | 0                    | 5                     | 0                      |
| reactome_Organic_anion_transporters_Main_Pathway                                                  | 0                          | 0                     | 0                    | 8                     | 0                      |
| reactome_Organic_cation_transport_Main_Pathway                                                    | -0,029                     | 0,062                 | -0,024               | 8                     | -0,027                 |
| reactome_Oxidative_Stress_Induced_Senesence_Main_Pathway                                          | 0,004                      | -0,023                | 0,039                | 80                    | 0,022                  |
| reactome_Oxygen_dependent_asparagine_hydroxylation_of_Hypoxia_inducible_Factor_Alpha_Main_Pathway | 0,042                      | -0,014                | -0,005               | 3                     | 0,019                  |
| reactome_Oxygen_dependent_proline_hydroxylation_of_Hypoxia_inducible_Factor_Alpha_Main_Pathway    | 0,038                      | -0,008                | 0,005                | 15                    | 0,021                  |
| reactome_p130Cas_linkage_to_MAPK_signaling_for_integrins_Main_Pathway                             | 0,031                      | -0,058                | 0,032                | 14                    | 0,031                  |
| reactome_P2Y_receptors_Main_Pathway                                                               | 0                          | 0                     | 0                    | 12                    | 0                      |
| reactome_p38MAPK_events_Main_Pathway                                                              | -0,045                     | 0,188                 | -0,005               | 10                    | -0,025                 |
| reactome_p53_Dependent_G1_DNA_Damage_Response_Main_Pathway                                        | 0,001                      | 0,018                 | -0,007               | 5                     | -0,003                 |
| reactome_p75NTR_negatively_regulates_cell_cycle_via_SC1_Main_Pathway                              | -0,072                     | 0,096                 | -0,044               | 6                     | -0,058                 |
| reactome_p75NTR_recruits_signalling_complexes_Main_Pathway                                        | 0,014                      | 0,052                 | -0,004               | 13                    | 0,005                  |
| reactome_Packaging_Of_Telomere_Ends_Main_Pathway                                                  | -0,007                     | 0,045                 | 0,008                | 31                    | 0,001                  |
| reactome_Pausing_and_recovery_of_HIV_elongation_Main_Pathway                                      | -0,006                     | -0,043                | 0,004                | 31                    | -0,001                 |
| reactome_Pausing_and_recovery_of_Tat_mediated_HIV_elongation_Main_Pathway                         | -0,008                     | -0,034                | 0,000                | 30                    | -0,004                 |
| reactome_PCP_CE_Main_Pathway                                                                      | 0,007                      | -0,045                | 0,023                | 21                    | 0,015                  |

| Pathway                                                                                                         | Tumour_MDA_MB.231_Invasive | Tumour_AU565_Invasive | Tumour_T47D_Invasive | Number of genes in PW | Mean (MDA_MB.231_T47D) |
|-----------------------------------------------------------------------------------------------------------------|----------------------------|-----------------------|----------------------|-----------------------|------------------------|
| reactome_PD_1_signaling_Main_Pathway                                                                            | -0,049                     | 0,299                 | -0,229               | 23                    | -0,139                 |
| reactome_PECAM1_interactions_Main_Pathway                                                                       | -0,060                     | 0,552                 | -0,007               | 11                    | -0,033                 |
| reactome_Pentose_phosphate_pathway_hexose_monophosphate_shunt_Main_Pathway                                      | -0,003                     | 0,077                 | 0,015                | 6                     | 0,006                  |
| reactome_Peptide_chain_elongation_Main_Pathway                                                                  | -0,009                     | 0,079                 | 0,027                | 84                    | 0,009                  |
| reactome_PERK_regulates_gene_expression_Main_Pathway                                                            | 0,032                      | -0,096                | -0,000               | 4                     | 0,016                  |
| reactome_Phagosomal_maturation_early_endosomal_stage_Main_Pathway                                               | -0,056                     | 0,059                 | -0,022               | 33                    | -0,039                 |
| reactome_Phenylalanine_and_tyrosine_catabolism_Main_Pathway                                                     | 0,032                      | 0,048                 | 0,002                | 9                     | 0,017                  |
| reactome_Phosphate_bond_hydrolysis_by_NUDT_proteins_Main_Pathway                                                | 0,024                      | 0,126                 | -0,047               | 3                     | -0,011                 |
| reactome_Phospholipase_C_mediated_cascade_Main_Pathway                                                          | -0,003                     | 0,011                 | -0,001               | 16                    | -0,002                 |
| reactome_Phosphorylation_of_CD3_and_TCR_zeta_chains_Main_Pathway                                                | -0,050                     | 0,326                 | -0,263               | 20                    | -0,157                 |
| reactome_Phosphorylation_of_Emi1_Main_Pathway                                                                   | 0,087                      | -0,198                | 0,009                | 6                     | 0,048                  |
| reactome_Phosphorylation_of_proteins_involved_in_G1_S_transition_by_active_Cyclin_E_Cdk2_complexes_Main_Pathway | -0,017                     | 0,061                 | 0,013                | 4                     | -0,002                 |
| reactome_Phosphorylation_of_proteins_involved_in_the_G2_M_transition_by_Cyclin_A_Cdc2_complexes_Main_Pathway    | 0,030                      | 0,047                 | 0,030                | 3                     | 0,030                  |
| reactome_Phosphorylation_of_the_APC_C_Main_Pathway                                                              | -0,025                     | 0,084                 | -0,020               | 17                    | -0,022                 |
| reactome_Pl_3K_cascade_Main_Pathway                                                                             | -0,001                     | 0,005                 | 0,007                | 20                    | 0,003                  |
| reactome_PI3K_AKT_activation_Main_Pathway                                                                       | 0,054                      | -0,153                | 0,017                | 9                     | 0,035                  |
| reactome_PI3K_Cascade_Main_Pathway                                                                              | 0,071                      | -0,029                | -0,017               | 7                     | 0,027                  |
| reactome_PI3K_events_in_ERBB2_signaling_Main_Pathway                                                            | -0,008                     | 0                     | 0,045                | 3                     | 0,018                  |
| reactome_PIP3_activates_AKT_signaling_Main_Pathway                                                              | 0,009                      | -0,032                | 0,039                | 10                    | 0,024                  |
| reactome_PKA_activation_in_glucagon_signalling_Main_Pathway                                                     | -0,039                     | 0,022                 | -0,009               | 17                    | -0,024                 |
| reactome_PKA_mediated_phosphorylation_of_CREB_Main_Pathway                                                      | -0,084                     | 0,135                 | -0,069               | 4                     | -0,076                 |
| reactome_PKA_mediated_phosphorylation_of_key_metabolic_factors_Main_Pathway                                     | -0,037                     | 0,044                 | -0,047               | 5                     | -0,042                 |
| reactome_Plasmalogen_biosynthesis_Main_Pathway                                                                  | -0,002                     | -0,019                | 0,004                | 4                     | 0,001                  |
| reactome_Platelet_Adhesion_to_exposed_collagen_Main_Pathway                                                     | -0,019                     | 0,546                 | -0,013               | 9                     | -0,016                 |
| reactome_Platelet_Aggregation_Plug_Formation_Main_Pathway                                                       | 0                          | 0                     | 0                    | 5                     | 0                      |
| reactome_Platelet_sensitization_by_LDL_Main_Pathway                                                             | 0,014                      | -0,053                | 0,004                | 17                    | 0,009                  |
| reactome_PL_C_beta_mediated_events_Main_Pathway                                                                 | -0,002                     | -0,091                | 0,030                | 15                    | 0,014                  |
| reactome_PL_C_gamma1_signalling_Main_Pathway                                                                    | 0,011                      | -0,398                | 0,120                | 3                     | 0,066                  |
| reactome_Polo_like_kinase_mediated_events_Main_Pathway                                                          | 0,029                      | 0,026                 | -0,036               | 16                    | -0,003                 |
| reactome_Polymerase_switching_Main_Pathway                                                                      | -0,097                     | 0,238                 | -0,039               | 14                    | -0,068                 |
| reactome_Polymerase_switching_on_the_C_strand_of_the_telomere_Main_Pathway                                      | -0,097                     | 0,238                 | -0,039               | 14                    | -0,068                 |
| reactome_Post_chaperonin_tubulin_folding_Main_Pathway                                                           | 0,067                      | -0,125                | 0,044                | 18                    | 0,056                  |
| reactome_Post_transcriptional_silencing_by_small_RNAs_Main_Pathway                                              | -0,013                     | 0,013                 | 0,042                | 3                     | 0,014                  |
| reactome_POU5F1_OCT4_SOX2_NANOG_activate_genes_related_to_proliferation_Main_Pathway                            | -0,014                     | 0,019                 | 0,017                | 9                     | 0,001                  |
| reactome_POU5F1_OCT4_SOX2_NANOG_repress_genes_related_to_differentiation_Main_Pathway                           | -0,065                     | 0,268                 | -0,007               | 3                     | -0,036                 |
| reactome_PP2A_mediated_dephosphorylation_of_key_metabolic_factors_Main_Pathway                                  | 0,045                      | -0,104                | -0,010               | 7                     | 0,017                  |
| reactome_PPARA_activates_gene_expression_Main_Pathway                                                           | 0,018                      | -0,059                | 0,031                | 61                    | 0,025                  |
| reactome_PRC2_methylates_histones_and_DNA_Main_Pathway                                                          | -0,012                     | 0,026                 | 0,023                | 35                    | 0,005                  |
| reactome_pre_mRNA_splicing_Main_Pathway                                                                         | -0,067                     | 0,129                 | -0,035               | 113                   | -0,051                 |
| reactome_Pre_NOTCH_Processing_in_Golgi_Main_Pathway                                                             | -0,014                     | 0,027                 | -0,021               | 18                    | -0,018                 |
| reactome_Pre_NOTCH_Processing_in_the_Endoplasmic_Reticulum_Main_Pathway                                         | -0,101                     | 0,062                 | -0,028               | 6                     | -0,064                 |
| reactome_Prefoldin_mediated_transfer_of_substrate_to_CCT_TriC_Main_Pathway                                      | 0,013                      | 0,021                 | 0,001                | 26                    | 0,007                  |
| reactome_Pregnenolone_biosynthesis_Main_Pathway                                                                 | 0,095                      | -0,041                | 0,082                | 6                     | 0,089                  |
| reactome_Presynaptic_function_of_Kainate_receptors_Main_Pathway                                                 | -0,017                     | -0,062                | 0,024                | 21                    | 0,004                  |
| reactome_Presynaptic_phase_of_homologous_DNA_pairing_and_strand_exchange_Main_Pathway                           | -0,054                     | 0,082                 | -0,013               | 4                     | -0,033                 |
| reactome_Processing_of_Capped_Intron_Containing_Pre_mRNA_Main_Pathway                                           | -0,082                     | 0,102                 | -0,031               | 35                    | -0,057                 |
| reactome_Processing_of_DNA_double_strand_break_ends_Main_Pathway                                                | -0,071                     | 0,110                 | -0,017               | 3                     | -0,044                 |
| reactome_Processing_of_DNA_ends_prior_to_end_rejoining_Main_Pathway                                             | -0,019                     | -0,067                | 0,012                | 4                     | -0,004                 |
| reactome_Processing_of_Intronless_Pre_mRNAs_Main_Pathway                                                        | -0,025                     | 0,095                 | 0,004                | 14                    | -0,011                 |
| reactome_Processive_synthesis_on_the_C_strand_of_the_telomere_Main_Pathway                                      | -0,057                     | 0,214                 | -0,021               | 6                     | -0,039                 |

| Pathway                                                                                                                     | Tumour_MDA_MB.231_Invasive | Tumour_AU565_Invasive | Tumour_T47D_Invasive | Number of genes in PW | Mean (MDA_MB.231_T47D) |
|-----------------------------------------------------------------------------------------------------------------------------|----------------------------|-----------------------|----------------------|-----------------------|------------------------|
| reactome_Processive_synthesis_on_the_lagging_strand_Main_Pathway                                                            | -0,080                     | 0,209                 | -0,035               | 9                     | -0,057                 |
| reactome_Progressive_trimming_of_alpha_1_2_linked_mannose_residues_from_Man9_8_7GlcNAc2_to_produce_Man5GlcNAc2_Main_Pathway | -0,166                     | 0,046                 | -0,041               | 3                     | -0,104                 |
| reactome_Prolactin_receptor_signaling_Main_Pathway                                                                          | 0,019                      | -0,038                | 0,027                | 13                    | 0,023                  |
| reactome_Propionyl_CoA_catabolism_Main_Pathway                                                                              | -0,069                     | 0,062                 | -0,044               | 5                     | -0,056                 |
| reactome_Prostacyclin_signalling_through_prostacyclin_receptor_Main_Pathway                                                 | -0,035                     | -0,044                | 0,016                | 19                    | -0,010                 |
| reactome_Prostanoid_ligand_receptors_Main_Pathway                                                                           | 0                          | 0                     | 0                    | 9                     | 0                      |
| reactome_Proton_coupled_monocarboxylate_transport_Main_Pathway                                                              | -0,088                     | 0,262                 | -0,021               | 4                     | -0,054                 |
| reactome_Proton_oligopeptide_cotransporters_Main_Pathway                                                                    | 0                          | 0                     | 0                    | 4                     | 0                      |
| reactome_Purine_catabolism_Main_Pathway                                                                                     | -0,041                     | -0,012                | 0,054                | 10                    | 0,006                  |
| reactome_Purine_ribonucleoside_monophosphate_biosynthesis_Main_Pathway                                                      | 0,048                      | 0,081                 | 0,017                | 7                     | 0,033                  |
| reactome_Purine_salvage_Main_Pathway                                                                                        | 0,005                      | 0,155                 | -0,011               | 8                     | -0,003                 |
| reactome_Pyrimidine_biosynthesis_Main_Pathway                                                                               | -0,038                     | 0,219                 | 0,027                | 5                     | -0,006                 |
| reactome_Pyrimidine_catabolism_Main_Pathway                                                                                 | -0,025                     | 0,056                 | -0,012               | 11                    | -0,018                 |
| reactome_Pyrimidine_salvage_reactions_Main_Pathway                                                                          | -0,018                     | 0,016                 | -0,005               | 9                     | -0,011                 |
| reactome_Pyruvate_metabolism_Main_Pathway                                                                                   | -0,057                     | -0,064                | -0,000               | 8                     | -0,028                 |
| reactome_RAF_activation_Main_Pathway                                                                                        | -0,058                     | 0,300                 | -0,023               | 5                     | -0,041                 |
| reactome_RAF_phosphorylates_MEK_Main_Pathway                                                                                | -0,028                     | 0,259                 | -0,031               | 7                     | -0,029                 |
| reactome_Rap1_signalling_Main_Pathway                                                                                       | -0,004                     | -0,043                | 0,006                | 15                    | 0,001                  |
| reactome_Ras_activation_uopn_Ca2_influx_through_NMDA_receptor_Main_Pathway                                                  | 0,005                      | -0,025                | 0,016                | 17                    | 0,010                  |
| reactome_Receptor_ligand_binding_initiates_the_second_proteolytic_cleavage_of_Notch_receptor_Main_Pathway                   | -0,024                     | -0,002                | -0,036               | 14                    | -0,030                 |
| reactome_Recognition_and_association_of_DNA_glycosylase_with_site_containing_an_affected_purine_Main_Pathway                | 0,029                      | 0,161                 | -0,015               | 3                     | 0,007                  |
| reactome_Recognition_and_association_of_DNA_glycosylase_with_site_containing_an_affected_pyrimidine_Main_Pathway            | 0,050                      | 0,089                 | 0,019                | 5                     | 0,034                  |
| reactome_Recruitment_of_mitotic_centrosome_proteins_and_complexes_Main_Pathway                                              | -0,001                     | -0,025                | 0,016                | 68                    | 0,007                  |
| reactome_Recruitment_of_NuMA_to_mitotic_centrosomes_Main_Pathway                                                            | -0,006                     | 0,029                 | -0,005               | 11                    | -0,006                 |
| reactome_Recruitment_of_repair_and_signaling_proteins_to_double_strand_breaks_Main_Pathway                                  | 0,055                      | 0,056                 | 0,037                | 5                     | 0,046                  |
| reactome_Recycling_of_bile_acids_and_salts_Main_Pathway                                                                     | -0,011                     | -0,006                | -0,014               | 16                    | -0,013                 |
| reactome_Recycling_of_eIF2_GDP_Main_Pathway                                                                                 | 0,010                      | 0,108                 | -0,049               | 8                     | -0,020                 |
| reactome_Recycling_pathway_of_L1_Main_Pathway                                                                               | 0,009                      | -0,101                | 0,029                | 26                    | 0,019                  |
| reactome_Reduction_of_cytosolic_Ca_levels_Main_Pathway                                                                      | -0,030                     | -0,048                | -0,061               | 10                    | -0,046                 |
| reactome_Regulated_proteolysis_of_p75NTR_Main_Pathway                                                                       | 0,034                      | -0,142                | 0,054                | 10                    | 0,044                  |
| reactome_Regulation_by_c_FLIP_Main_Pathway                                                                                  | -0,473                     | 0,545                 | 0,008                | 9                     | -0,233                 |
| reactome_Regulation_of_actin_dynamics_for_phagocytic_cup_formation_Main_Pathway                                             | 0,014                      | -0,059                | 0,025                | 60                    | 0,020                  |
| reactome_Regulation_of_activated_PAK_2p34_by_proteasome_mediated_degradation_Main_Pathway                                   | -0,011                     | 0,041                 | -0,006               | 49                    | -0,009                 |
| reactome_Regulation_of_AMPK_activity_via_LKB1_Main_Pathway                                                                  | -0,011                     | 0,032                 | -0,027               | 14                    | -0,019                 |
| reactome_Regulation_of_APC_C_activators_between_G1_S_and_early_anaphase_Main_Pathway                                        | -0,006                     | 0,032                 | -0,004               | 22                    | -0,005                 |
| reactome_Regulation_of_cholesterol_biosynthesis_by_SREBP_SREBF_Main_Pathway                                                 | 0,073                      | -0,084                | 0,023                | 14                    | 0,048                  |
| reactome_Regulation_of_Commissural_axon_pathfinding_by_Slit_and_Robo_Main_Pathway                                           | -0,020                     | 0,096                 | -0,046               | 3                     | -0,033                 |
| reactome_Regulation_of_Complement_cascade_Main_Pathway                                                                      | 0,013                      | -0,021                | 0,098                | 13                    | 0,055                  |
| reactome_regulation_of_FZD_by_ubiquitination_Main_Pathway                                                                   | 0,018                      | -0,059                | 0,032                | 21                    | 0,025                  |
| reactome_Regulation_of_gene_expression_by_Hypoxia_inducible_Factor_Main_Pathway                                             | 0,012                      | -0,076                | 0,085                | 9                     | 0,048                  |
| reactome_Regulation_of_gene_expression_in_endocrine_committed_NEUROG3_progenitor_cells_Main_Pathway                         | 0                          | 0                     | 0                    | 5                     | 0                      |
| reactome_Regulation_of_gene_expression_in_late_stage_branching_morphogenesis_pancreatic_bud_precursor_cells_Main_Pathway    | 0                          | 0                     | 0                    | 4                     | 0                      |
| reactome_Regulation_of_Glucokinase_by_Glucokinase_Regulatory_Protein_Main_Pathway                                           | -0,073                     | -0,027                | 0,015                | 26                    | -0,029                 |
| reactome_Regulation_of_HSF1_mediated_heat_shock_response_Main_Pathway                                                       | -0,018                     | 0,067                 | -0,019               | 15                    | -0,019                 |
| reactome_Regulation_of_IFNA_signaling_Main_Pathway                                                                          | -0,010                     | -0,047                | -0,003               | 23                    | -0,006                 |
| reactome_Regulation_of_IFNG_signaling_Main_Pathway                                                                          | 0,001                      | -0,057                | -0,003               | 12                    | -0,001                 |
| reactome_Regulation_of_IGF_Activity_by_IGFBP_Main_Pathway                                                                   | -0,014                     | -0,024                | 0,013                | 21                    | -0,000                 |

| Pathway                                                                                                            | Tumour_MDA_MB.231_Invasive | Tumour_AU565_Invasive | Tumour_T47D_Invasive | Number of genes in PW | Mean (MDA_MB.231_T47D) |
|--------------------------------------------------------------------------------------------------------------------|----------------------------|-----------------------|----------------------|-----------------------|------------------------|
| reactome_Regulation_of_innate_immune_responses_to_cytosolic_DNA_Main_Pathway                                       | 0,140                      | 0,017                 | -0,005               | 11                    | 0,067                  |
| reactome_Regulation_of_KIT_signaling_Main_Pathway                                                                  | -0,050                     | 0,505                 | -0,015               | 12                    | -0,032                 |
| reactome_Regulation_of_lipid_metabolism_by_Peroxisome_proliferator_activated_receptor_alpha_PPARalpha_Main_Pathway | -0,073                     | -0,029                | 0,047                | 19                    | -0,013                 |
| reactome_Regulation_of_ornithine_decarboxylase_ODC_Main_Pathway                                                    | -0,013                     | 0,031                 | 0,002                | 50                    | -0,006                 |
| reactome_Regulation_of_PLK1_Activity_at_G2_M_Transition_Main_Pathway                                               | 0,006                      | -0,037                | 0,019                | 71                    | 0,013                  |
| reactome_Regulation_of_pyruvate_dehydrogenase_PDH_complex_Main_Pathway                                             | -0,042                     | -0,055                | -0,033               | 13                    | -0,038                 |
| reactome_Regulation_of_Rheb_GTPase_activity_by_AMPK_Main_Pathway                                                   | 0,002                      | 0,015                 | -0,022               | 10                    | -0,010                 |
| reactome_Regulation_of_signaling_by_CBL_Main_Pathway                                                               | -0,047                     | 0,514                 | 0,005                | 11                    | -0,021                 |
| reactome_Regulation_of_signaling_by_NODAL_Main_Pathway                                                             | 0                          | 0                     | 0                    | 4                     | 0                      |
| reactome_Regulation_of_the_Fanconi_anemia_Main_Pathway                                                             | 0,022                      | -0,142                | -0,020               | 8                     | 0,001                  |
| reactome_Relaxin_receptors_Main_Pathway                                                                            | 0                          | 0                     | 0                    | 3                     | 0                      |
| reactome_Release_of_eIF4E_Main_Pathway                                                                             | 0,016                      | 0,211                 | -0,025               | 6                     | -0,005                 |
| reactome_Release_of_Hh_Np_from_the_secreting_cell_Main_Pathway                                                     | -0,050                     | 0,023                 | 0,011                | 8                     | -0,019                 |
| reactome_Removal_of_aminoterminal_propeptides_from_gamma_carboxylated_proteins_Main_Pathway                        | 0                          | 0                     | 0                    | 9                     | 0                      |
| reactome_Removal_of_DNA_patch_containing_abasic_residue_Main_Pathway                                               | -0,051                     | 0,152                 | -0,006               | 9                     | -0,029                 |
| reactome_Removal_of_the_Flap_Intermediate_from_the_C_strand_Main_Pathway                                           | -0,064                     | 0,186                 | -0,035               | 10                    | -0,050                 |
| reactome_Removal_of_the_Flap_Intermediate_Main_Pathway                                                             | -0,078                     | 0,191                 | -0,032               | 14                    | -0,055                 |
| reactome_Repair_synthesis_for_gap_filling_by_DNA_polymerase_in_IC_NER_Main_Pathway                                 | -0,080                     | 0,171                 | -0,029               | 15                    | -0,054                 |
| reactome_Repair_synthesis_of_patch_27_30_bases_long_by_DNA_polymerase_Main_Pathway                                 | -0,080                     | 0,171                 | -0,029               | 15                    | -0,054                 |
| reactome_repression_of_WNT_target_genes_Main_Pathway                                                               | 0,048                      | -0,139                | 0,004                | 10                    | 0,026                  |
| reactome_Resolution_of_AP_sites_via_the_multiple_nucleotide_patch_replacement_Main_Pathway                         | -0,028                     | 0,162                 | -0,036               | 6                     | -0,032                 |
| reactome_Resolution_of_AP_sites_via_the_single_nucleotide_replacement_Main_Pathway                                 | -0,084                     | -0,060                | 0,039                | 3                     | -0,023                 |
| reactome_Resolution_of_Sister_Chromatid_Cohesion_Main_Pathway                                                      | -0,004                     | 0,012                 | 0,008                | 94                    | 0,002                  |
| reactome_Respiratory_electron_transport_Main_Pathway                                                               | -0,140                     | 0,091                 | -0,028               | 86                    | -0,084                 |
| reactome_Response_to_elevated_platelet_cytosolic_Ca2_Main_Pathway                                                  | -0,012                     | 0,020                 | 0,013                | 3                     | 0,001                  |
| reactome_Retinoid_metabolism_and_transport_Main_Pathway                                                            | -0,051                     | 0,061                 | -0,014               | 41                    | -0,032                 |
| reactome_Retrograde_neurotrophin_signalling_Main_Pathway                                                           | -0,056                     | -0,103                | 0,034                | 13                    | -0,011                 |
| reactome_Reuptake_of_GABA_Main_Pathway                                                                             | 0                          | 0                     | 0                    | 4                     | 0                      |
| reactome_Rev_mediated_nuclear_export_of_HIV_RNA_Main_Pathway                                                       | -0,061                     | -0,017                | 0,012                | 29                    | -0,025                 |
| reactome_Rhesus_glycoproteins_mediate_ammonium_transport_Main_Pathway                                              | 0                          | 0                     | 0                    | 3                     | 0                      |
| reactome_Rho_GTPase_cycle_Main_Pathway                                                                             | -0,005                     | -0,016                | 0,006                | 119                   | 0,001                  |
| reactome_Ribosomal_scanning_and_start_codon_recognition_Main_Pathway                                               | -0,024                     | 0,103                 | 0,005                | 55                    | -0,009                 |
| reactome_RIG_I_MDA5_mediated_induction_of_IFN_alpha_beta_pathways_Main_Pathway                                     | -0,002                     | -0,057                | -0,011               | 13                    | -0,007                 |
| reactome_RIP_mediated_NFkB_activation_via_ZBP1_Main_Pathway                                                        | -0,003                     | -0,065                | 0,025                | 21                    | 0,011                  |
| reactome_RMTs_methylate_histone_arginines_Main_Pathway                                                             | -0,020                     | 0,048                 | -0,003               | 43                    | -0,012                 |
| reactome_RNA_Pol_II_CTD_phosphorylation_and_interaction_with_CE_Main_Pathway                                       | -0,024                     | -0,009                | -0,021               | 26                    | -0,022                 |
| reactome_RNA_Polymerase_I_Chain_Elongation_Main_Pathway                                                            | -0,010                     | -0,009                | 0,009                | 56                    | -0,000                 |
| reactome_RNA_Polymerase_I_Promoter_Escape_Main_Pathway                                                             | -0,024                     | -0,030                | 0,003                | 29                    | -0,010                 |
| reactome_RNA_Polymerase_I_Promoter_Opening_Main_Pathway                                                            | -0,010                     | -0,010                | -0,009               | 30                    | -0,010                 |
| reactome_RNA_Polymerase_I_Transcription_Initiation_Main_Pathway                                                    | -0,039                     | 0,025                 | 0,002                | 46                    | -0,018                 |
| reactome_RNA_Polymerase_I_Transcription_Termination_Main_Pathway                                                   | -0,022                     | -0,026                | 0,002                | 30                    | -0,010                 |
| reactome_RNA_Polymerase_II_HIV_Promoter_Escape_Main_Pathway                                                        | -0,041                     | 0,016                 | -0,040               | 43                    | -0,040                 |
| reactome_RNA_Polymerase_II_Pre_transcription_Events_Main_Pathway                                                   | -0,022                     | -0,025                | -0,022               | 60                    | -0,022                 |
| reactome_RNA_Polymerase_II_Promoter_Escape_Main_Pathway                                                            | -0,041                     | 0,016                 | -0,040               | 43                    | -0,040                 |
| reactome_RNA_Polymerase_II_Transcription_Elongation_Main_Pathway                                                   | -0,004                     | -0,068                | -0,000               | 40                    | -0,002                 |
| reactome_RNA_Polymerase_II_Transcription_Initiation_And_Promoter_Clearance_Main_Pathway                            | -0,041                     | 0,016                 | -0,040               | 43                    | -0,040                 |
| reactome_RNA_Polymerase_II_Transcription_Initiation_Main_Pathway                                                   | -0,041                     | 0,016                 | -0,040               | 43                    | -0,040                 |
| reactome_RNA_Polymerase_II_Transcription_Pre_Initiation_And_Promoter_Opening_Main_Pathway                          | -0,041                     | 0,016                 | -0,040               | 43                    | -0,040                 |

| Pathway                                                                                 | Tumour_MDA_MB.231_Invasive | Tumour_AU565_Invasive | Tumour_T47D_Invasive | Number of genes in PW | Mean (MDA_MB.231_T47D) |
|-----------------------------------------------------------------------------------------|----------------------------|-----------------------|----------------------|-----------------------|------------------------|
| reactome_RNA_Polymerase_III_Abortive_And_Retractive_Initiation_Main_Pathway             | -0,005                     | 0,049                 | 0,001                | 40                    | -0,002                 |
| reactome_RNA_Polymerase_III_Chain_Elongation_Main_Pathway                               | -0,019                     | 0,035                 | -0,018               | 18                    | -0,018                 |
| reactome_RNA_Polymerase_III_Transcription_Initiation_From_Type_1_Promoter_Main_Pathway  | -0,019                     | 0,025                 | -0,004               | 27                    | -0,012                 |
| reactome_RNA_Polymerase_III_Transcription_Initiation_From_Type_2_Promoter_Main_Pathway  | -0,018                     | 0,021                 | -0,016               | 26                    | -0,017                 |
| reactome_RNA_Polymerase_III_Transcription_Initiation_From_Type_3_Promoter_Main_Pathway  | -0,009                     | 0,056                 | -0,007               | 28                    | -0,008                 |
| reactome_RNA_Polymerase_III_Transcription_Termination_Main_Pathway                      | -0,005                     | 0,043                 | -0,013               | 23                    | -0,009                 |
| reactome_RNF_mutants_show_enhanced_WNT_signaling_and_proliferation_Main_Pathway         | -0,029                     | -0,107                | 0,111                | 8                     | 0,041                  |
| reactome_Role_of_Abl_in_Robo_Slit_signaling_Main_Pathway                                | 0,066                      | 0,013                 | -0,012               | 9                     | 0,027                  |
| reactome_Role_of_DCC_in_regulating_apoptosis_Main_Pathway                               | 0,035                      | -0,080                | 0,004                | 10                    | 0,019                  |
| reactome_Role_of_LAT2_NTAL_LAB_on_calcium_mobilization_Main_Pathway                     | -0,056                     | 0,447                 | 0,006                | 13                    | -0,025                 |
| reactome_Role_of_phospholipids_in_phagocytosis_Main_Pathway                             | -0,016                     | -0,002                | 0,013                | 28                    | -0,002                 |
| reactome_Role_of_second_messengers_in_netrin_1_signaling_Main_Pathway                   | -0,004                     | 0,018                 | -0,002               | 10                    | -0,003                 |
| reactome_RSK_activation_Main_Pathway                                                    | 0,024                      | 0,024                 | -0,002               | 6                     | 0,011                  |
| reactome_S6K1_mediated_signalling_Main_Pathway                                          | -1,131                     | 0,101                 | 0,118                | 5                     | -0,507                 |
| reactome_S6K1_signalling_Main_Pathway                                                   | -0,988                     | 0,096                 | 0,104                | 5                     | -0,442                 |
| reactome_Scavenging_by_Class_A_Receptors_Main_Pathway                                   | -0,031                     | -0,058                | -0,001               | 8                     | -0,016                 |
| reactome_Scavenging_by_Class_B_Receptors_Main_Pathway                                   | -0,057                     | 0,076                 | -0,038               | 3                     | -0,048                 |
| reactome_Scavenging_by_Class_F_Receptors_Main_Pathway                                   | -0,123                     | 0,022                 | -0,006               | 6                     | -0,064                 |
| reactome_Scavenging_of_heme_from_plasma_Main_Pathway                                    | -0,006                     | 0,003                 | -0,024               | 14                    | -0,015                 |
| reactome_SCF_beta_TrCP_mediated_degradation_of_Emi1_Main_Pathway                        | 0,000                      | 0,006                 | -0,001               | 53                    | -0,001                 |
| reactome_SCF_Skp2_mediated_degradation_of_p27_p21_Main_Pathway                          | -0,001                     | 0,022                 | -0,001               | 56                    | -0,001                 |
| reactome_Sema3A_PAK_dependent_Axon_repulsion_Main_Pathway                               | -0,034                     | 0,084                 | -0,011               | 16                    | -0,023                 |
| reactome_SEMA3A_Plexin_repulsion_signaling_by_inhibiting_Integrin_adhesion_Main_Pathway | 0,025                      | -0,079                | 0,037                | 14                    | 0,031                  |
| reactome_Sema4D_induced_cell_migration_and_growth_cone_collapse_Main_Pathway            | 0,054                      | -0,082                | 0,011                | 24                    | 0,032                  |
| reactome_Sema4D_mediated_inhibition_of_cell_attachment_and_migration_Main_Pathway       | -0,011                     | -0,173                | -0,012               | 8                     | -0,011                 |
| reactome_Senescence_Associated_Secretory_Phenotype_SASP_Main_Pathway                    | -0,003                     | 0,042                 | 0,008                | 69                    | 0,003                  |
| reactome_Separation_of_Sister_Chromatids_Main_Pathway                                   | -0,009                     | 0,027                 | 0,001                | 158                   | -0,004                 |
| reactome_Serine_biosynthesis_Main_Pathway                                               | -0,062                     | 0,318                 | -0,125               | 3                     | -0,094                 |
| reactome_Serotonin_and_melatonin_biosynthesis_Main_Pathway                              | 0                          | 0                     | 0                    | 5                     | 0                      |
| reactome_Serotonin_Neurotransmitter_Release_Cycle_Main_Pathway                          | -0,001                     | 0,025                 | -0,016               | 17                    | -0,008                 |
| reactome_Serotonin_receptors_Main_Pathway                                               | 0                          | 0                     | 0                    | 12                    | 0                      |
| reactome_SHC_activation_Main_Pathway                                                    | -0,004                     | 0,014                 | -0,018               | 3                     | -0,011                 |
| reactome_SHC_mediated_cascade_Main_Pathway                                              | -0,021                     | 0,078                 | -0,002               | 19                    | -0,012                 |
| reactome_SHC_mediated_signalling_Main_Pathway                                           | -0,060                     | 0,217                 | -0,012               | 7                     | -0,036                 |
| reactome_SHC_related_events_triggered_by_IGF1R_Main_Pathway                             | 0                          | 0                     | 0                    | 3                     | 0                      |
| reactome_SHC1_events_in_EGFR_signaling_Main_Pathway                                     | -0,109                     | -0,003                | 0,052                | 7                     | -0,028                 |
| reactome_SHC1_events_in_ERBB2_signaling_Main_Pathway                                    | -0,077                     | -0,002                | 0,037                | 10                    | -0,020                 |
| reactome_SHC1_events_in_ERBB4_signaling_Main_Pathway                                    | -0,035                     | 0,127                 | -0,007               | 12                    | -0,021                 |
| reactome_Sialic_acid_metabolism_Main_Pathway                                            | -0,008                     | -0,014                | -0,009               | 33                    | -0,008                 |
| reactome_Signal_attenuation_Main_Pathway                                                | 0,044                      | -0,065                | 0,004                | 10                    | 0,024                  |
| reactome_Signal_regulatory_protein_SIRP_family_interactions_Main_Pathway                | 0,017                      | -0,082                | 0,031                | 9                     | 0,024                  |
| reactome_Signal_transduction_by_L1_Main_Pathway                                         | -0,001                     | -0,097                | 0,037                | 12                    | 0,018                  |
| reactome_Signaling_by_activated_point_mutants_of_FGFR1_Main_Pathway                     | 0                          | 0                     | 0                    | 8                     | 0                      |
| reactome_Signaling_by_activated_point_mutants_of_FGFR3_Main_Pathway                     | 0                          | 0                     | 0                    | 9                     | 0                      |
| reactome_Signaling_by_Activin_Main_Pathway                                              | 0,032                      | -0,105                | 0,020                | 9                     | 0,026                  |
| reactome_Signaling_by_BMP_Main_Pathway                                                  | -0,001                     | -0,016                | 0,012                | 23                    | 0,006                  |
| reactome_Signaling_by_constitutively_active_EGFR_Main_Pathway                           | -0,057                     | 0,003                 | 0,035                | 14                    | -0,011                 |
| reactome_Signaling_by_EGFR_Main_Pathway                                                 | -0,045                     | -0,346                | 0,105                | 6                     | 0,030                  |
| reactome_Signaling_by_ERBB2_Main_Pathway                                                | 0,015                      | -0,122                | 0,026                | 18                    | 0,021                  |
| reactome_Signaling_by_ERBB4_Main_Pathway                                                | -0,038                     | -0,172                | 0,050                | 9                     | 0,006                  |
| reactome_Signaling_by_FGFR_Main_Pathway                                                 | -0,048                     | -0,156                | 0,052                | 4                     | 0,002                  |
| reactome_Signaling_by_FGFR_mutants_Main_Pathway                                         | -0,021                     | 0,072                 | 0,004                | 23                    | -0,008                 |

| Pathway                                                                                    | Tumour_MDA_MB.231_Invasive | Tumour_AU565_Invasive | Tumour_T47D_Invasive | Number of genes in PW | Mean (MDA_MB.231_T47D) |
|--------------------------------------------------------------------------------------------|----------------------------|-----------------------|----------------------|-----------------------|------------------------|
| reactome_Signaling_by_FGFR1_fusion_mutants_Main_Pathway                                    | 0,014                      | -0,061                | 0,046                | 17                    | 0,030                  |
| reactome_Signaling_by_FGFR3_mutants_Main_Pathway                                           | 0                          | 0                     | 0                    | 8                     | 0                      |
| reactome_Signaling_by_Hippo_Main_Pathway                                                   | 0,008                      | -0,098                | 0,047                | 19                    | 0,027                  |
| reactome_Signaling_by_Leptin_Main_Pathway                                                  | 0,057                      | -0,145                | 0,016                | 9                     | 0,036                  |
| reactome_Signaling_by_NODAL_Main_Pathway                                                   | 0,019                      | -0,062                | 0,011                | 15                    | 0,015                  |
| reactome_Signaling_by_NOTCH3_Main_Pathway                                                  | -0,039                     | -0,081                | -0,022               | 11                    | -0,031                 |
| reactome_Signaling_by_NOTCH4_Main_Pathway                                                  | -0,039                     | -0,081                | -0,022               | 11                    | -0,031                 |
| reactome_Signaling_by_Robo_receptor_Main_Pathway                                           | -0,045                     | 0,144                 | -0,051               | 8                     | -0,048                 |
| reactome_Signaling_by_SCF_KIT_Main_Pathway                                                 | -0,015                     | 0,178                 | -0,011               | 34                    | -0,013                 |
| reactome_Signaling_by_Type_1_Insulin_like_Growth_Factor_1_Receptor_IGF1R_Main_Pathway      | 0                          | 0                     | 0                    | 3                     | 0                      |
| reactome_Signaling_by_Wnt_Main_Pathway                                                     | -0,029                     | -0,107                | 0,111                | 8                     | 0,041                  |
| reactome_Signalling_to_p38_via_RIT_and_RIN_Main_Pathway                                    | 0,016                      | -0,274                | 0,075                | 5                     | 0,045                  |
| reactome_Signalling_to_RAS_Main_Pathway                                                    | -0,038                     | 0,017                 | 0,033                | 9                     | -0,003                 |
| reactome_Signalling_to_STAT3_Main_Pathway                                                  | 0,049                      | -0,669                | 0,182                | 3                     | 0,115                  |
| reactome_SIRT1_negatively_regulates_rRNA_Expression_Main_Pathway                           | 0,004                      | 0,007                 | 0,016                | 35                    | 0,010                  |
| reactome_SLPB_Dependent_Processing_of_Replication_Dependent_Histone_Pre_mRNAs_Main_Pathway | -0,057                     | 0,141                 | -0,074               | 11                    | -0,066                 |
| reactome_SLPB_independent_Processing_of_Histone_Pre_mRNAs_Main_Pathway                     | -0,063                     | 0,155                 | -0,082               | 10                    | -0,072                 |
| reactome_SMAC_binds_to_IAPs_Main_Pathway                                                   | -0,063                     | 0,124                 | -0,091               | 5                     | -0,077                 |
| reactome_SMAC_mediated_dissociation_of_IAP_caspase_complexes_Main_Pathway                  | -0,063                     | 0,124                 | -0,091               | 5                     | -0,077                 |
| reactome_SMAD2_3_MH2_Domain_Mutants_in_Cancer_Main_Pathway                                 | 0,055                      | -0,179                | 0,033                | 5                     | 0,044                  |
| reactome_SMAD2_3_Phosphorylation_Motif_Mutants_in_Cancer_Main_Pathway                      | 0,055                      | -0,179                | 0,033                | 5                     | 0,044                  |
| reactome_SMAD2_SMAD3_SMAD4_heterotrimer_regulates_transcription_Main_Pathway               | -0,016                     | -0,240                | 0,081                | 16                    | 0,032                  |
| reactome_Small_interfering_RNA_siRNA_biogenesis_Main_Pathway                               | -0,019                     | 0,002                 | 0,043                | 7                     | 0,012                  |
| reactome_snRNP_Assembly_Main_Pathway                                                       | -0,047                     | 0,021                 | 0,008                | 46                    | -0,019                 |
| reactome_Sodium_Calcium_exchangers_Main_Pathway                                            | 0                          | 0                     | 0                    | 9                     | 0                      |
| reactome_Sodium_coupled_sulphate_di_and_tri_carboxylate_transporters_Main_Pathway          | 0                          | 0                     | 0                    | 5                     | 0                      |
| reactome_Sodium_Proton_exchangers_Main_Pathway                                             | -0,016                     | 0,001                 | 0,004                | 9                     | -0,006                 |
| reactome_SOS_mediated_signalling_Main_Pathway                                              | -0,005                     | 0,181                 | -0,027               | 6                     | -0,016                 |
| reactome_Sperm_Motility_And_Taxes_Main_Pathway                                             | 0                          | 0                     | 0                    | 9                     | 0                      |
| reactome_Sperm_Oocyte_Membrane_Binding_Main_Pathway                                        | 0                          | 0                     | 0                    | 5                     | 0                      |
| reactome_Sphingolipid_de_novo_biosynthesis_Main_Pathway                                    | -0,023                     | -0,059                | 0,011                | 28                    | -0,006                 |
| reactome_Spry_regulation_of_FGF_signaling_Main_Pathway                                     | 0,014                      | -0,025                | -0,001               | 7                     | 0,006                  |
| reactome_SRP_dependent_cotranslational_protein_targeting_to_membrane_Main_Pathway          | -0,021                     | 0,041                 | 0,022                | 107                   | 0,000                  |
| reactome_Stabilization_of_p53_Main_Pathway                                                 | -0,101                     | 0,220                 | -0,048               | 3                     | -0,074                 |
| reactome_STAT6_mediated_induction_of_chemokines_Main_Pathway                               | 0,130                      | -0,458                | 0,154                | 3                     | 0,142                  |
| reactome_STING_mediated_induction_of_host_immune_responses_Main_Pathway                    | -0,047                     | 0,193                 | -0,010               | 5                     | -0,028                 |
| reactome_Striated_Muscle_Contraction_Main_Pathway                                          | 0,048                      | -0,095                | 0,043                | 31                    | 0,045                  |
| reactome_Sulfide_oxidation_to_sulfate_Main_Pathway                                         | -0,074                     | -0,257                | -0,056               | 5                     | -0,065                 |
| reactome_Sulfur_amino_acid_metabolism_Main_Pathway                                         | 0,023                      | 0,058                 | 0,055                | 7                     | 0,039                  |
| reactome_SUMO_is_conjugated_to_E1_UBA2_SAE1_Main_Pathway                                   | -0,103                     | 0,247                 | -0,024               | 5                     | -0,064                 |
| reactome_SUMO_is_proteolytically_processed_Main_Pathway                                    | -0,037                     | 0,035                 | 0,016                | 6                     | -0,011                 |
| reactome_SUMO_is_transferred_from_E1_to_E2_UBE21_UBC9_Main_Pathway                         | -0,100                     | 0,252                 | -0,028               | 6                     | -0,064                 |
| reactome_Switching_of_origins_to_a_post_replicative_state_Main_Pathway                     | -0,077                     | 0,076                 | -0,011               | 6                     | -0,044                 |
| reactome_Synthesis_of_12_eicosatetraenoic_acid_derivatives_Main_Pathway                    | -0,173                     | 0,230                 | 0,002                | 5                     | -0,085                 |
| reactome_Synthesis_of_15_eicosatetraenoic_acid_derivatives_Main_Pathway                    | -0,216                     | 0,288                 | 0,003                | 4                     | -0,107                 |
| reactome_Synthesis_of_16_20_hydroxyeicosatetraenoic_acids_HETE_Main_Pathway                | 0                          | 0                     | 0                    | 9                     | 0                      |
| reactome_Synthesis_of_5_eicosatetraenoic_acids_Main_Pathway                                | -0,144                     | 0,192                 | 0,002                | 6                     | -0,071                 |
| reactome_Synthesis_of_bile_acids_and_bile_salts_Main_Pathway                               | 0                          | 0                     | 0                    | 7                     | 0                      |
| reactome_Synthesis_of_bile_acids_and_bile_salts_via_24_hydroxycholesterol_Main_Pathway     | -0,058                     | 0,074                 | -0,053               | 14                    | -0,055                 |
| reactome_Synthesis_of_bile_acids_and_bile_salts_via_27_hydroxycholesterol_Main_Pathway     | -0,018                     | 0,031                 | -0,015               | 15                    | -0,017                 |



| Pathway                                                                                                        | Tumour_MDA_MB.231_Invasive | Tumour_AU565_Invasive | Tumour_T47D_Invasive | Number of genes in PW | Mean (MDA_MB.231_T47D) |
|----------------------------------------------------------------------------------------------------------------|----------------------------|-----------------------|----------------------|-----------------------|------------------------|
| reactome_Synthesis_of_bile_acids_and_bile_salts_via_7alpha_hydroxycholesterol_Main_Pathway                     | -0,052                     | 0,033                 | -0,024               | 23                    | -0,038                 |
| reactome_Synthesis_of_Dolichyl_phosphate_Main_Pathway                                                          | 0,011                      | -0,097                | 0,015                | 5                     | 0,013                  |
| reactome_Synthesis_of_dolichyl_phosphate_mannose_Main_Pathway                                                  | -0,014                     | -0,130                | 0,069                | 3                     | 0,027                  |
| reactome_Synthesis_of_epoxy_EET_and_dihydroxyeicosatrienoic_acids_DHET_Main_Pathway                            | 0                          | 0                     | 0                    | 8                     | 0                      |
| reactome_Synthesis_of_GDP_mannose_Main_Pathway                                                                 | 0,032                      | 0,073                 | 0,001                | 5                     | 0,017                  |
| reactome_Synthesis_of_glycosylphosphatidylinositol_GPI_Main_Pathway                                            | -0,004                     | 0,008                 | -0,026               | 15                    | -0,015                 |
| reactome_Synthesis_of_IP2_IP_and_Ins_in_the_cytosol_Main_Pathway                                               | 0,023                      | -0,116                | 0,011                | 9                     | 0,017                  |
| reactome_Synthesis_of_IP3_and_IP4_in_the_cytosol_Main_Pathway                                                  | -0,028                     | 0,070                 | -0,019               | 9                     | -0,023                 |
| reactome_Synthesis_of_IPs_in_the_nucleus_Main_Pathway                                                          | 0                          | 0                     | 0                    | 4                     | 0                      |
| reactome_Synthesis_of_Ketone_Bodies_Main_Pathway                                                               | -0,042                     | 0,078                 | -0,089               | 4                     | -0,066                 |
| reactome_Synthesis_of_Leukotrienes_LT_and_Eoxins_EX_Main_Pathway                                               | 0,036                      | -0,079                | 0,029                | 15                    | 0,032                  |
| reactome_Synthesis_of_Lipoxins_LX_Main_Pathway                                                                 | 0,091                      | -0,205                | 0,064                | 6                     | 0,077                  |
| reactome_Synthesis_of_PA_Main_Pathway                                                                          | -0,041                     | 0,008                 | 0,013                | 20                    | -0,014                 |
| reactome_Synthesis_of_PC_Main_Pathway                                                                          | -0,063                     | 0,409                 | -0,017               | 12                    | -0,040                 |
| reactome_Synthesis_of_PE_Main_Pathway                                                                          | -0,112                     | 0,070                 | -0,071               | 7                     | -0,092                 |
| reactome_Synthesis_of_PG_Main_Pathway                                                                          | -0,025                     | -0,076                | 0,067                | 8                     | 0,021                  |
| reactome_Synthesis_of_PIPs_at_the_early_endosome_membrane_Main_Pathway                                         | -0,016                     | 0,113                 | -0,021               | 11                    | -0,018                 |
| reactome_Synthesis_of_PIPs_at_the_ER_membrane_Main_Pathway                                                     | -0,069                     | -0,127                | -0,041               | 3                     | -0,055                 |
| reactome_Synthesis_of_PIPs_at_the_Golgi_membrane_Main_Pathway                                                  | -0,010                     | 0,011                 | -0,014               | 14                    | -0,012                 |
| reactome_Synthesis_of_PIPs_at_the_late_endosome_membrane_Main_Pathway                                          | -0,025                     | 0,100                 | -0,005               | 7                     | -0,015                 |
| reactome_Synthesis_of_PIPs_at_the_plasma_membrane_Main_Pathway                                                 | 0,024                      | 0,054                 | -0,013               | 33                    | 0,006                  |
| reactome_Synthesis_of_Prostaglandins_PG_and_Thromboxanes_TX_Main_Pathway                                       | -0,035                     | -0,138                | 0,115                | 14                    | 0,040                  |
| reactome_Synthesis_of_pyrophosphates_in_the_cytosol_Main_Pathway                                               | -0,071                     | 0,078                 | -0,050               | 7                     | -0,061                 |
| reactome_Synthesis_of_UDP_N_acetyl_glucosamine_Main_Pathway                                                    | 0,195                      | -0,224                | 0,029                | 5                     | 0,112                  |
| reactome_Synthesis_of_very_long_chain_fatty_acyl_CoAs_Main_Pathway                                             | -0,046                     | -0,052                | 0,024                | 16                    | -0,011                 |
| reactome_Synthesis_secretion_and_deacylation_of_Ghrelin_Main_Pathway                                           | -0,047                     | -0,025                | 0,009                | 15                    | -0,019                 |
| reactome_Synthesis_secretion_and_inactivation_of_Glucagon_like_Peptide_1_GLP_1_Main_Pathway                    | -0,044                     | -0,023                | 0,008                | 16                    | -0,018                 |
| reactome_Synthesis_secretion_and_inactivation_of_Glucose_dependent_Insulinotropic_Polypeptide_GIP_Main_Pathway | -0,070                     | -0,037                | 0,013                | 10                    | -0,028                 |
| reactome_Tachykinin_receptors_bind_tachykinins_Main_Pathway                                                    | 0                          | 0                     | 0                    | 3                     | 0                      |
| reactome_TAK1_activates_NFkB_by_phosphorylation_and_activation_of_IKKs_complex_Main_Pathway                    | -0,004                     | -0,088                | 0,027                | 16                    | 0,011                  |
| reactome_Tat_mediated_elongation_of_the_HIV_1_transcript_Main_Pathway                                          | -0,005                     | -0,062                | -0,004               | 39                    | -0,004                 |
| reactome_Tat_mediated_HIV_elongation_arrest_and_recovery_Main_Pathway                                          | -0,008                     | -0,034                | 0,000                | 30                    | -0,004                 |
| reactome_TCF_dependent_signaling_in_response_to_WNT_Main_Pathway                                               | -0,000                     | 0,004                 | 0,004                | 17                    | 0,002                  |
| reactome_Telomere_C_strand_Lagging_Strand_Synthesis_Main_Pathway                                               | -0,053                     | 0,211                 | -0,045               | 5                     | -0,049                 |
| reactome_Telomere_C_strand_synthesis_initiation_Main_Pathway                                                   | -0,088                     | 0,092                 | -0,000               | 6                     | -0,044                 |
| reactome_Telomere_Extension_By_Telomerase_Main_Pathway                                                         | -0,100                     | 0,095                 | -0,022               | 6                     | -0,061                 |
| reactome_temp_Immuno regulatory_interactions_between_a_Lymphoid_and_a_non-Lymphoid_cell                        | 0,003                      | -0,023                | 0,015                | 221                   | 0,009                  |
| reactome_temp_Nuclear_Receptor_transcription_pathway                                                           | -0,009                     | -0,020                | 0,009                | 51                    | -0,000                 |
| reactome_temp_Post-translational_modification_synthesis_of_GPI-anchored_proteins                               | -0,007                     | 0,003                 | 0,002                | 92                    | -0,002                 |
| reactome_Terminal_pathway_of_complement_Main_Pathway                                                           | 0                          | 0                     | 0                    | 7                     | 0                      |
| reactome_Termination_of_O_glycan_biosynthesis_Main_Pathway                                                     | -0,004                     | -0,000                | -0,000               | 24                    | -0,002                 |
| reactome_TGF_beta_receptor_signaling_activates_SMADs_Main_Pathway                                              | -0,329                     | 0,364                 | -0,425               | 11                    | -0,377                 |
| reactome_TGF_beta_receptor_signaling_in_EMT_epithelial_to_mesenchymal_transition_Main_Pathway                  | 0,053                      | -0,001                | 0,006                | 16                    | 0,030                  |
| reactome_TGFBR1_KD_Mutants_in_Cancer_Main_Pathway                                                              | 0,153                      | 0,029                 | 0,013                | 4                     | 0,083                  |
| reactome_TGFBR2_Kinase_Domain_Mutants_in_Cancer_Main_Pathway                                                   | 0,153                      | 0,029                 | 0,013                | 4                     | 0,083                  |
| reactome_The_activation_of_arylsulfatases_Main_Pathway                                                         | 0,021                      | 0,043                 | -0,026               | 13                    | -0,003                 |
| reactome_The_AIM2_inflammasome_Main_Pathway                                                                    | 0                          | 0                     | 0                    | 3                     | 0                      |
| reactome_The_canonical_retinoid_cycle_in_rods_twilight_vision_Main_Pathway                                     | -0,058                     | 0,072                 | -0,025               | 21                    | -0,042                 |
| reactome_The_fatty_acid_cycling_model_Main_Pathway                                                             | 0                          | 0                     | 0                    | 3                     | 0                      |
| reactome_The_NLRP1_inflammasome_Main_Pathway                                                                   | -0,120                     | 0,141                 | -0,092               | 3                     | -0,106                 |
| reactome_The_NLRP3_inflammasome_Main_Pathway                                                                   | 0,013                      | -0,011                | -0,064               | 12                    | -0,026                 |
| reactome_The_proton_buffering_model_Main_Pathway                                                               | 0                          | 0                     | 0                    | 3                     | 0                      |

| Pathway                                                                                                                 | Tumour_MDA_MB.231_Invasive | Tumour_AU565_Invasive | Tumour_T47D_Invasive | Number of genes in PW | Mean (MDA_MB.231_T47D) |
|-------------------------------------------------------------------------------------------------------------------------|----------------------------|-----------------------|----------------------|-----------------------|------------------------|
| reactome_The_retinoid_cycle_in_cones_daylight_vision_Main_Pathway                                                       | -0,013                     | 0,036                 | 0,019                | 6                     | 0,003                  |
| reactome_Thrombin_signalling_through_proteinase_activated_receptors_PARs_Main_Pathway                                   | -0,029                     | -0,089                | 0,027                | 29                    | -0,001                 |
| reactome_Thromboxane_signalling_through_IP_receptor_Main_Pathway                                                        | -0,033                     | -0,052                | 0,019                | 23                    | -0,007                 |
| reactome_Thyroxine_biosynthesis_Main_Pathway                                                                            | 0                          | 0                     | 0                    | 5                     | 0                      |
| reactome_Tie2_Signaling_Main_Pathway                                                                                    | -0,016                     | 0,110                 | -0,011               | 17                    | -0,014                 |
| reactome_Toll_Like_Receptor_4_TLR4_Cascade_Main_Pathway                                                                 | -0,024                     | 0,032                 | 0,004                | 10                    | -0,010                 |
| reactome_Toll_Like_Receptor_9_TLR9_Cascade_Main_Pathway                                                                 | -0,040                     | 0,059                 | -0,019               | 5                     | -0,030                 |
| reactome_Toll_Like_Receptor_TLR6_TLR2_Cascade_Main_Pathway                                                              | 0                          | 0                     | 0                    | 4                     | 0                      |
| reactome_Toxicity_of_botulinum_toxin_type_A_BoNT_A_Main_Pathway                                                         | 0                          | 0                     | 0                    | 4                     | 0                      |
| reactome_Toxicity_of_botulinum_toxin_type_B_BoNT_B_Main_Pathway                                                         | -0,014                     | 0,192                 | -0,108               | 3                     | -0,061                 |
| reactome_Toxicity_of_botulinum_toxin_type_C_BoNT_C_Main_Pathway                                                         | 0                          | 0                     | 0                    | 3                     | 0                      |
| reactome_Toxicity_of_botulinum_toxin_type_D_BoNT_D_Main_Pathway                                                         | 0                          | 0                     | 0                    | 5                     | 0                      |
| reactome_Toxicity_of_botulinum_toxin_type_E_BoNT_E_Main_Pathway                                                         | 0                          | 0                     | 0                    | 3                     | 0                      |
| reactome_Toxicity_of_botulinum_toxin_type_F_BoNT_F_Main_Pathway                                                         | 0                          | 0                     | 0                    | 5                     | 0                      |
| reactome_Toxicity_of_botulinum_toxin_type_G_BoNT_G_Main_Pathway                                                         | -0,014                     | 0,192                 | -0,108               | 3                     | -0,061                 |
| reactome_TRAF3_dependent_IRF_activation_Main_Pathway                                                                    | 0,064                      | -0,112                | 0,055                | 10                    | 0,060                  |
| reactome_TRAF6_Mediated_Induction_of_proinflammatory_cytokines_Main_Pathway                                             | 0,085                      | 0,078                 | -0,014               | 5                     | 0,035                  |
| reactome_TRAF6_mediated_induction_of_TAK1_complex_Main_Pathway                                                          | 0,062                      | 0,077                 | -0,000               | 9                     | 0,031                  |
| reactome_TRAF6_mediated_IRF7_activation_in_TLR7_8_or_9_signaling_Main_Pathway                                           | -0,027                     | 0,140                 | -0,059               | 8                     | -0,043                 |
| reactome_TRAF6_mediated_NF_kB_activation_Main_Pathway                                                                   | -0,005                     | -0,050                | 0,025                | 20                    | 0,010                  |
| reactome_Trafficking_and_processing_of_endosomal_TLR_Main_Pathway                                                       | -0,084                     | 0,055                 | -0,010               | 13                    | -0,047                 |
| reactome_Trafficking_of_AMPA_receptors_Main_Pathway                                                                     | -0,042                     | 0,042                 | 0,016                | 14                    | -0,013                 |
| reactome_Trafficking_of_GluR2_containing_AMPA_receptors_Main_Pathway                                                    | -0,019                     | 0,007                 | 0,032                | 5                     | 0,006                  |
| reactome_TRAIL_signaling_Main_Pathway                                                                                   | -0,704                     | 0,783                 | -0,004               | 6                     | -0,354                 |
| reactome_Transcription_coupled_NER_TC_NER_Main_Pathway                                                                  | -0,036                     | 0,033                 | -0,011               | 12                    | -0,023                 |
| reactome_Transcription_of_the_HIV_genome_Main_Pathway                                                                   | -0,041                     | 0,016                 | -0,040               | 43                    | -0,040                 |
| reactome_Transcriptional_activation_of_mitochondrial_biogenesis_Main_Pathway                                            | -0,040                     | 0,027                 | -0,009               | 36                    | -0,025                 |
| reactome_Transcriptional_regulation_of_pluripotent_stem_cells_Main_Pathway                                              | -0,009                     | 0,012                 | 0,011                | 15                    | 0,001                  |
| reactome_Transcriptional_regulation_of_white_adipocyte_differentiation_Main_Pathway                                     | -0,059                     | 0,009                 | -0,019               | 62                    | -0,039                 |
| reactome_Transferrin_endocytosis_and_recycling_Main_Pathway                                                             | -0,062                     | 0,076                 | -0,021               | 29                    | -0,041                 |
| reactome_Translation_initiation_complex_formation_Main_Pathway                                                          | -0,023                     | 0,105                 | 0,006                | 55                    | -0,009                 |
| reactome_Translocation_of_Glut4_to_the_plasma_membrane_Main_Pathway                                                     | -0,037                     | -0,038                | 0,014                | 53                    | -0,012                 |
| reactome_Translocation_of_ZAP_70_to_Immunological_synapse_Main_Pathway                                                  | -0,049                     | 0,337                 | -0,292               | 18                    | -0,170                 |
| reactome_Transport_and_synthesis_of_PAPS_Main_Pathway                                                                   | -0,034                     | 0,047                 | -0,001               | 6                     | -0,017                 |
| reactome_Transport_of_fatty_acids_Main_Pathway                                                                          | -0,150                     | -0,013                | -0,023               | 3                     | -0,086                 |
| reactome_Transport_of_glucose_and_other_sugars_bile_salts_and_organic_acids_metal_ions_and_amine_compounds_Main_Pathway | -0,038                     | 0,450                 | -0,025               | 11                    | -0,032                 |
| reactome_Transport_of_inorganic_cations_anions_and_amino_acids_oligopeptides_Main_Pathway                               | 0                          | 0                     | 0                    | 6                     | 0                      |
| reactome_Transport_of_Mature_mRNA_derived_from_an_Intron_Containing_Transcript_Main_Pathway                             | -0,077                     | 0,062                 | -0,013               | 47                    | -0,045                 |
| reactome_Transport_of_Mature_mRNA_Derived_from_an_Intronless_Transcript_Main_Pathway                                    | -0,065                     | 0,003                 | 0,010                | 32                    | -0,027                 |
| reactome_Transport_of_nucleosides_and_free_purine_and_pyrimidine_bases_across_the_plasma_membrane_Main_Pathway          | 0,002                      | -0,073                | 0,056                | 7                     | 0,029                  |
| reactome_Transport_of_nucleotide_sugars_Main_Pathway                                                                    | -0,153                     | 0,030                 | -0,048               | 9                     | -0,101                 |
| reactome_Transport_of_organic_anions_Main_Pathway                                                                       | -0,016                     | -0,020                | -0,026               | 10                    | -0,021                 |
| reactome_Transport_of_Ribonucleoproteins_into_the_Host_Nucleus_Main_Pathway                                             | -0,070                     | -0,020                | 0,014                | 26                    | -0,028                 |
| reactome_Transport_of_the_SLP_Dependant_Mature_mRNA_Main_Pathway                                                        | -0,077                     | 0,002                 | 0,002                | 30                    | -0,037                 |
| reactome_Transport_of_the_SLP_independent_Mature_mRNA_Main_Pathway                                                      | -0,079                     | 0,002                 | 0,002                | 29                    | -0,039                 |
| reactome_Transport_of_vitamins_nucleosides_and_related_molecules_Main_Pathway                                           | 0,047                      | -0,100                | 0,007                | 3                     | 0,027                  |
| reactome_TRIF_mediated_programmed_cell_death_Main_Pathway                                                               | 0,098                      | -0,007                | 0,083                | 4                     | 0,090                  |
| reactome_Triglyceride_Biosynthesis_Main_Pathway                                                                         | -0,046                     | 0,091                 | 0,002                | 20                    | -0,022                 |
| reactome_Tristetraprolin_TTP_destabilizes_mRNA_Main_Pathway                                                             | 0,003                      | 0,115                 | -0,041               | 17                    | -0,019                 |
| reactome_TRP_channels_Main_Pathway                                                                                      | -0,011                     | -0,021                | 0,021                | 25                    | 0,005                  |

| Pathway                                                                                                    | Tumour_MDA_MB.231_Invasive | Tumour_AU565_Invasive | Tumour_T47D_Invasive | Number of genes in PW | Mean (MDA_MB.231_T47D) |
|------------------------------------------------------------------------------------------------------------|----------------------------|-----------------------|----------------------|-----------------------|------------------------|
| reactome_Tryptophan_catabolism_Main_Pathway                                                                | -0,005                     | 0,014                 | -0,008               | 11                    | -0,007                 |
| reactome_TWIK_related_potassium_channel_TREK_Main_Pathway                                                  | 0                          | 0                     | 0                    | 3                     | 0                      |
| reactome_Type_I_hemidesmosome_assembly_Main_Pathway                                                        | -0,040                     | -0,263                | 0,033                | 9                     | -0,003                 |
| reactome_Type_II_Na_Pi_cotransporters_Main_Pathway                                                         | 0                          | 0                     | 0                    | 3                     | 0                      |
| reactome_U12_Dependent_Splicing_Main_Pathway                                                               | -0,072                     | 0,170                 | -0,062               | 42                    | -0,067                 |
| reactome_Ubiquinol_biosynthesis_Main_Pathway                                                               | -0,035                     | 0,061                 | -0,009               | 7                     | -0,022                 |
| reactome_Ubiquitin_dependent_degradation_of_Cyclin_D1_Main_Pathway                                         | -0,008                     | 0,031                 | -0,009               | 50                    | -0,008                 |
| reactome_Ubiquitin_Mediated_Degradation_of_Phosphorylated_Cdc25A_Main_Pathway                              | -0,009                     | 0,035                 | -0,007               | 51                    | -0,008                 |
| reactome_Unblocking_of_NMDA_receptor_glutamate_binding_and_activation_Main_Pathway                         | 0,015                      | -0,045                | 0,022                | 13                    | 0,018                  |
| reactome_Unwinding_of_DNA_Main_Pathway                                                                     | 0,002                      | 0,009                 | 0,015                | 11                    | 0,008                  |
| reactome_Uptake_and_function_of_anthrax_toxins_Main_Pathway                                                | 0,084                      | -0,182                | 0,075                | 7                     | 0,080                  |
| reactome_Urea_cycle_Main_Pathway                                                                           | -0,040                     | 0,134                 | -0,070               | 9                     | -0,055                 |
| reactome_Vasopressin_like_receptors_Main_Pathway                                                           | 0                          | 0                     | 0                    | 4                     | 0                      |
| reactome_Vasopressin_regulates_renal_water_homeostasis_via_Aquaporins_Main_Pathway                         | -0,029                     | -0,009                | 0,005                | 43                    | -0,012                 |
| reactome_VEGF_binds_to_VEGFR_leading_to_receptor_dimerization_Main_Pathway                                 | 0                          | 0                     | 0                    | 3                     | 0                      |
| reactome_VEGF_ligand_receptor_interactions_Main_Pathway                                                    | 0                          | 0                     | 0                    | 5                     | 0                      |
| reactome_VEGFA_VEGFR2_Pathway_Main_Pathway                                                                 | 0,008                      | -0,018                | 0,016                | 56                    | 0,012                  |
| reactome_VEGFR2_mediated_cell_proliferation_Main_Pathway                                                   | -0,039                     | 0,103                 | -0,012               | 16                    | -0,026                 |
| reactome_VEGFR2_mediated_vascular_permeability_Main_Pathway                                                | -0,019                     | -0,035                | 0,022                | 25                    | 0,001                  |
| reactome_Vif_mediated_degradation_of_APOBEC3G_Main_Pathway                                                 | -0,002                     | 0,028                 | -0,005               | 52                    | -0,003                 |
| reactome_Viral_Messenger_RNA_Synthesis_Main_Pathway                                                        | -0,045                     | 0,063                 | -0,017               | 14                    | -0,031                 |
| reactome_Viral_mRNA_Translation_Main_Pathway                                                               | -0,014                     | 0,082                 | 0,026                | 84                    | 0,006                  |
| reactome_Vitamin_B1_thiamin_metabolism_Main_Pathway                                                        | 0                          | 0                     | 0                    | 4                     | 0                      |
| reactome_Vitamin_B2_riboflavin_metabolism_Main_Pathway                                                     | 0,056                      | -0,111                | 0,045                | 5                     | 0,051                  |
| reactome_Vitamin_B5_pantothenate_metabolism_Main_Pathway                                                   | 0,032                      | 0,150                 | 0,017                | 4                     | 0,025                  |
| reactome_Vitamin_C_ascorbate_metabolism_Main_Pathway                                                       | -0,110                     | -0,011                | 0,008                | 6                     | -0,051                 |
| reactome_Vitamin_D_calciferol_metabolism_Main_Pathway                                                      | -0,052                     | 0,051                 | -0,056               | 7                     | -0,054                 |
| reactome_Vitamins_B6_activation_to_pyridoxal_phosphate_Main_Pathway                                        | -0,025                     | 0,114                 | 0,004                | 3                     | -0,010                 |
| reactome_Vitamins_Main_Pathway                                                                             | 0                          | 0                     | 0                    | 6                     | 0                      |
| reactome_Voltage_gated_Potassium_channels_Main_Pathway                                                     | -0,001                     | 0,021                 | -0,004               | 43                    | -0,002                 |
| reactome_Vpr_mediated_induction_of_apoptosis_by_mitochondrial_outer_membrane_permeabilization_Main_Pathway | -0,185                     | 0,295                 | 0,013                | 3                     | -0,086                 |
| reactome_Vpr_mediated_nuclear_import_of_PICs_Main_Pathway                                                  | -0,080                     | 0,014                 | -0,009               | 28                    | -0,044                 |
| reactome_Vpu_mediated_degradation_of_CD4_Main_Pathway                                                      | -0,007                     | 0,030                 | -0,005               | 51                    | -0,006                 |
| reactome_WNT_ligand_biogenesis_and_trafficking_Main_Pathway                                                | -0,009                     | 0,008                 | -0,012               | 26                    | -0,011                 |
| reactome_WNT_mediated_activation_of_DVL_Main_Pathway                                                       | -0,000                     | 0,011                 | 0,010                | 6                     | 0,005                  |
| reactome_WNT5A_dependent_internalization_of_FZD2_FZD5_and_ROR2_Main_Pathway                                | -0,041                     | -0,057                | 0,001                | 13                    | -0,020                 |
| reactome_WNT5A_dependent_internalization_of_FZD4_Main_Pathway                                              | -0,025                     | -0,084                | 0,018                | 12                    | -0,004                 |
| reactome_XAV939_inhibits_tankyrase_stabilizing_AXIN_Main_Pathway                                           | 0,017                      | 0,064                 | -0,078               | 10                    | -0,030                 |
| reactome_XBP1_S_activates_chaperone_genes_Main_Pathway                                                     | 0                          | 0                     | 0                    | 44                    | 0                      |
| reactome_Xenobiotics_Main_Pathway                                                                          | -0,014                     | 0,017                 | -0,005               | 19                    | -0,010                 |
| reactome_Zinc_efflux_and_compartmentalization_by_the_SLC30_family_Main_Pathway                             | 0,035                      | -0,063                | -0,019               | 7                     | 0,008                  |
| reactome_Zinc_influx_into_cells_by_the_SLC39_gene_family_Main_Pathway                                      | -0,455                     | 0,217                 | 0,099                | 10                    | -0,178                 |
| Regulation_of_Angiogenesis_by_Interleukin-8                                                                | 0,012                      | -0,369                | 0,132                | 6                     | 0,072                  |
| Regulation_of_Cell_Migration_and_Proliferation_by_Somatostatin_Receptor                                    | -0,008                     | -0,015                | 0,017                | 38                    | 0,004                  |
| Regulation_of_Cell_Migration_by_Platelet-derived_Growth_Factors                                            | -0,011                     | 0,034                 | 0,010                | 22                    | -0,000                 |
| Regulation_of_Cytoskeleton_Remodeling_by_Activin_A                                                         | 0,059                      | -0,149                | 0,046                | 20                    | 0,052                  |
| Regulation_of_Cytoskeleton_Remodeling_by_Protein_Kinase_A                                                  | -0,019                     | -0,029                | 0,016                | 75                    | -0,002                 |
| Regulation_of_Cytoskeleton_Remodeling_by_TGF_and_WNT                                                       | 0,023                      | -0,049                | 0,024                | 118                   | 0,023                  |
| Regulation_of_Epithelial-mesenchymal_transition                                                            | 0,014                      | 0,020                 | 0,002                | 3                     | 0,008                  |
| Regulation_of_Repulsive_Axonal_Pathfinding                                                                 | 0,013                      | -0,049                | 0,016                | 83                    | 0,015                  |
| resolvin_D_biosynthesis                                                                                    | 0                          | 0                     | 0                    | 2                     | 0                      |
| retinoate_biosynthesis_I                                                                                   | 0,029                      | -0,215                | 0,086                | 8                     | 0,058                  |
| retinoate_biosynthesis_II                                                                                  | -0,004                     | -0,050                | 0,031                | 4                     | 0,013                  |
| retinoL_biosynthesis                                                                                       | -0,021                     | -0,039                | 0,011                | 17                    | -0,005                 |

| Pathway                                                                 | Tumour_MDA_MB.231_Invasive | Tumour_AU565_Invasive | Tumour_T47D_Invasive | Number of genes in PW | Mean (MDA_MB.231_T47D) |
|-------------------------------------------------------------------------|----------------------------|-----------------------|----------------------|-----------------------|------------------------|
| RhoA_Signaling                                                          | -0,038                     | -0,016                | -0,008               | 29                    | -0,023                 |
| RhoB_Signaling                                                          | 0,027                      | 0,098                 | 0,035                | 5                     | 0,031                  |
| Role_of_Cholinergic_Receptors_in_Migration_of_Keratinocytes             | 0                          | 0                     | 0                    | 7                     | 0                      |
| Role_of_KITLG_in_Haematopoiesis                                         | -0,068                     | 0,062                 | 0,010                | 66                    | -0,029                 |
| Role_of_NTN1_in_Axon_Pathfinding                                        | -0,022                     | -0,007                | 0,002                | 51                    | -0,010                 |
| Role_of_Rho_GTPases_in_of_Actin_Cytoskeleton_Organization               | 0,051                      | -0,106                | 0,013                | 52                    | 0,032                  |
| Role_of_Small_GTPases_in_G1-S_Transition                                | 0,045                      | -0,061                | 0,021                | 51                    | 0,033                  |
| S-adenosyl-L-methionine_biosynthesis                                    | -0,065                     | 0,159                 | -0,018               | 3                     | -0,041                 |
| selenocysteine_biosynthesis                                             | 0,016                      | 0,027                 | -0,018               | 5                     | -0,001                 |
| serine_and_glycine_biosynthesis                                         | -0,028                     | 0,164                 | -0,060               | 7                     | -0,044                 |
| serine_biosynthesis_phosphorylated_route                                | -0,035                     | 0,205                 | -0,075               | 4                     | -0,055                 |
| serotonin_and_melatonin_biosynthesis                                    | 0                          | 0                     | 0                    | 5                     | 0                      |
| serotonin_degradation                                                   | -0,136                     | 0,145                 | -0,056               | 9                     | -0,096                 |
| Slit-Robo_Pathway                                                       | 0,037                      | -0,072                | 0,021                | 61                    | 0,029                  |
| SMAD_Signaling_Network_Pathway                                          | 0,004                      | -0,012                | 0,006                | 126                   | 0,005                  |
| Smooth_Muscle_Tone_Regulation_by_G-protein_Coupled_Receptors            | -0,010                     | -0,024                | 0,008                | 49                    | -0,001                 |
| sorbitol_degradation_I                                                  | 0,026                      | 0,365                 | -0,062               | 1                     | -0,018                 |
| spermidine_biosynthesis                                                 | 0                          | 0                     | 0                    | 2                     | 0                      |
| spermine_and_spermidine_degradation_I                                   | -0,989                     | 0,845                 | -0,065               | 5                     | -0,527                 |
| spermine_biosynthesis                                                   | 0                          | 0                     | 0                    | 2                     | 0                      |
| sphingomyelin_metabolismceramide_salvage                                | 0,009                      | 0,000                 | 0,018                | 8                     | 0,014                  |
| sphingosine_and_sphingosine-1-phosphate_metabolism                      | 0,037                      | -0,078                | 0,007                | 10                    | 0,022                  |
| SPP1_Pathway_in_Osteoclasts                                             | 0,020                      | -0,094                | 0,038                | 34                    | 0,029                  |
| S-reticuline_biosynthesis                                               | 0                          | 0                     | 0                    | 1                     | 0                      |
| STAT3_Pathway                                                           | -0,012                     | -0,005                | 0,006                | 233                   | -0,003                 |
| STAT3_Pathway_Anti-Apoptosis                                            | 0,023                      | -0,212                | 0,056                | 3                     | 0,040                  |
| STAT3_Pathway_G1_to_S_Cell_Cycle_Progression                            | 0,023                      | -0,212                | 0,056                | 3                     | 0,040                  |
| STAT3_Pathway_Growth_Arrest_and_Differentiation                         | -0,038                     | 0,009                 | 0,005                | 105                   | -0,017                 |
| STATs_Pathway_Regulation_by_GH                                          | 0,029                      | -0,076                | 0,035                | 29                    | 0,032                  |
| stearate_biosynthesis                                                   | -0,048                     | -0,025                | 0,040                | 12                    | -0,004                 |
| sucrose_degradation                                                     | -0,004                     | -0,215                | -0,031               | 8                     | -0,017                 |
| sulfate_activation_for_sulfonation                                      | 0,064                      | 0,032                 | 0,006                | 2                     | 0,035                  |
| sulfite_oxidation                                                       | -0,006                     | -1,118                | -0,105               | 1                     | -0,055                 |
| superoxide_radicals_degradation                                         | 0,070                      | -0,220                | 0,048                | 4                     | 0,059                  |
| superpathway_of_cholesterol_biosynthesis                                | 0,024                      | -0,166                | 0,031                | 25                    | 0,027                  |
| superpathway_of_choline_degradation_to_L-serine                         | -0,064                     | 0,106                 | -0,004               | 7                     | -0,034                 |
| superpathway_of_D-imyoi-inositol_145-trisphosphate_metabolism           | -0,021                     | 0,101                 | -0,025               | 20                    | -0,023                 |
| superpathway_of_geranylgeranyldiphosphate_biosynthesis_I_via_mevalonate | 0,088                      | -0,076                | 0,013                | 12                    | 0,051                  |
| superpathway_of_inositol_phosphate_compounds                            | -0,051                     | 0,098                 | -0,008               | 69                    | -0,029                 |
| superpathway_of_melatonin_degradation                                   | -0,087                     | 0,191                 | -0,034               | 12                    | -0,060                 |
| superpathway_of_methionine_degradation                                  | -0,057                     | -0,025                | -0,046               | 17                    | -0,051                 |
| superpathway_of_purine_nucleotide_salvage                               | -0,060                     | 0,081                 | -0,022               | 44                    | -0,041                 |
| superpathway_of_pyrimidine_deoxyribonucleoside_salvage                  | 0,006                      | -0,041                | -0,011               | 16                    | -0,003                 |
| superpathway_of_pyrimidine_deoxyribonucleotides_ide_novoi_biosynthesis  | 0,011                      | 0,052                 | -0,007               | 21                    | 0,002                  |
| superpathway_of_pyrimidine_ribonucleotides_ide_novoi_biosynthesis       | -0,006                     | 0,049                 | -0,029               | 14                    | -0,018                 |
| superpathway_of_steroid_hormone_biosynthesis                            | -0,039                     | 0,064                 | -0,018               | 16                    | -0,029                 |
| superpathway_of_tryptophan_utilization                                  | -0,064                     | 0,041                 | -0,019               | 37                    | -0,042                 |
| Target_drugs_pathway                                                    | 0,004                      | -0,008                | 0,007                | 190                   | 0,005                  |
| taurine_biosynthesis                                                    | -0,011                     | 0,096                 | 0,023                | 3                     | 0,006                  |
| TCA_cycle                                                               | -0,131                     | 0,061                 | -0,034               | 18                    | -0,083                 |
| terminal_iOi-glycans_residues_modification                              | -0,009                     | 0,030                 | -0,018               | 13                    | -0,014                 |
| tetrahydrobiopterin_ide_novoi_biosynthesis                              | 0                          | 0                     | 0                    | 3                     | 0                      |
| tetrahydrofolate_salvage_from_510-methenyltetrahydrofolate              | 0,072                      | -0,059                | 0,030                | 2                     | 0,051                  |
| tetrapyrrole_biosynthesis                                               | 0,027                      | 0,033                 | -0,037               | 5                     | -0,005                 |
| TGF-Beta_Pathway                                                        | -0,018                     | 0,002                 | 0,010                | 218                   | -0,004                 |
| TGF-Beta_Pathway_Epithelial_Mesenchymal_Transdifferentiation            | 0,017                      | 0,007                 | 0,007                | 14                    | 0,012                  |
| TGF-Beta_Pathway_Post_Transcriptional_G1_Arrest                         | 0,030                      | -0,041                | -0,007               | 16                    | 0,012                  |
| TGF-Beta_Pathway_Transcription_Arrested_Growth_Apoptosis                | 0,032                      | -0,041                | 0,039                | 30                    | 0,036                  |

| Pathway                                                                             | Tumour_MDA_MB.231_Invasive | Tumour_AU565_Invasive | Tumour_T47D_Invasive | Number of genes in PW | Mean (MDA_MB.231_T47D) |
|-------------------------------------------------------------------------------------|----------------------------|-----------------------|----------------------|-----------------------|------------------------|
| TGF-Beta_Pathway_Transcription_Cell_Growth_and_Mobility_and_Angiogenesis            | 0,032                      | -0,041                | 0,039                | 30                    | 0,036                  |
| TGF-beta_Signaling_in_Epithelial-mesenchymal_transition                             | 0,029                      | -0,021                | 0,028                | 52                    | 0,029                  |
| the_visual_cycle_I_vertibrates                                                      | -0,033                     | -0,027                | 0,007                | 16                    | -0,013                 |
| thiamin_salvage_III                                                                 | 0                          | 0                     | 0                    | 1                     | 0                      |
| thio-molybdenum_cofactor_biosynthesis                                               | 0,983                      | 0,985                 | -0,655               | 1                     | 0,164                  |
| thioredoxin_pathway                                                                 | 0,027                      | -0,047                | -0,022               | 5                     | 0,002                  |
| thiosulfate_disproportionation_III_rhodanese                                        | -0,166                     | 0,282                 | -0,079               | 1                     | -0,123                 |
| threonine_degradation                                                               | -0,019                     | -0,185                | -0,037               | 6                     | -0,028                 |
| thymine_degradation                                                                 | 0                          | 0                     | 0                    | 3                     | 0                      |
| thyroid_hormone_biosynthesis                                                        | 0                          | 0                     | 0                    | 2                     | 0                      |
| thyroid_hormone_metabolism_I_via_deiodination                                       | -0,056                     | 0,016                 | 0,027                | 3                     | -0,014                 |
| thyroid_hormone_metabolism_II_via_conjugation_andor_degradation                     | -0,104                     | 0,174                 | -0,039               | 6                     | -0,071                 |
| thyronamine_and_iodothyronamine_metabolism                                          | -0,056                     | 0,016                 | 0,027                | 3                     | -0,014                 |
| Tight_Junctions                                                                     | -0,015                     | -0,067                | 0,026                | 28                    | 0,006                  |
| TNF_Signaling_Pathway                                                               | 0,013                      | -0,042                | 0,037                | 64                    | 0,025                  |
| TNF_Signaling_Pathway_Apoptosis                                                     | -0,020                     | 0,091                 | -0,024               | 14                    | -0,022                 |
| TNF_Signaling_Pathway_Gene_Expression_and_Cell_Survival_via_FOS_NFKB2_JUN_ELK1_ATF6 | 0,034                      | -0,108                | 0,062                | 37                    | 0,048                  |
| TRAF_Pathway                                                                        | 0,013                      | -0,040                | 0,033                | 100                   | 0,023                  |
| TRAF_Pathway_Apoptosis                                                              | 0,018                      | 0,018                 | 0,023                | 13                    | 0,021                  |
| TRAF_Pathway_Cell_Survival                                                          | 0,037                      | -0,020                | 0,010                | 14                    | 0,024                  |
| TRAF_Pathway_Gene_Expression_via_FOS_JUN                                            | 0,037                      | -0,066                | 0,086                | 11                    | 0,061                  |
| Transport_between_Cytoplasm_and_Mitochondria                                        | -0,046                     | -0,032                | 0,054                | 5                     | 0,004                  |
| trehalose_degradation                                                               | -0,046                     | -0,038                | 0,045                | 3                     | -0,001                 |
| TRH_Influence_on_Cytoskeleton                                                       | -0,050                     | 0,029                 | 0,006                | 37                    | -0,022                 |
| TRH_Pathway                                                                         | -0,023                     | -0,024                | 0,021                | 77                    | -0,001                 |
| triacylglycerol_biosynthesis                                                        | -0,060                     | 0,033                 | 0,004                | 24                    | -0,028                 |
| triacylglycerol_degradation                                                         | -0,017                     | -0,006                | 0,021                | 14                    | 0,002                  |
| tRNA_charging                                                                       | -0,043                     | 0,041                 | -0,013               | 39                    | -0,028                 |
| tRNA_splicing                                                                       | -0,119                     | 0,300                 | 0,003                | 5                     | -0,058                 |
| tryptophan_degradation                                                              | -0,012                     | -0,058                | 0,001                | 9                     | -0,005                 |
| tryptophan_degradation_to_2-amino-3-carboxymuconate_semialdehyde                    | 0                          | 0                     | 0                    | 7                     | 0                      |
| tryptophan_degradation_X_mammalian_via_tryptamine                                   | -0,055                     | -0,033                | -0,020               | 4                     | -0,038                 |
| TSPANs_Influence_on_Integrin-based_Cell_Migration_and_Adhesion                      | 0,031                      | -0,149                | 0,039                | 55                    | 0,035                  |
| Tumour_Infiltration_Pathway                                                         | -0,014                     | -0,023                | 0,021                | 200                   | 0,004                  |
| TYROBP_Signaling_in_Natural_Killer_Cells                                            | -0,010                     | 0,012                 | 0,007                | 63                    | -0,001                 |
| tyrosine_degradation                                                                | -0,021                     | 0,027                 | -0,023               | 5                     | -0,022                 |
| ubiquinol-10_biosynthesis                                                           | -0,035                     | 0,061                 | -0,009               | 7                     | -0,022                 |
| Ubiquitin-Proteasome_Dependent_Proteolysis_Pathway                                  | -0,003                     | -0,005                | 0,001                | 131                   | -0,001                 |
| UDP-D-xylose_and_UDP-D-glucuronate_biosynthesis                                     | 0,087                      | 0,342                 | -0,129               | 2                     | -0,021                 |
| UDP-iNi-acetyl-D-galactosamine_biosynthesis_I                                       | 0,046                      | -0,247                | 0,085                | 1                     | 0,065                  |
| UDP-iNi-acetyl-D-galactosamine_biosynthesis_II                                      | 0,115                      | -0,212                | 0,076                | 8                     | 0,096                  |
| UDP-iNi-acetyl-D-glucosamine_biosynthesis_II                                        | 0,232                      | -0,294                | 0,070                | 5                     | 0,151                  |
| UMP_biosynthesis                                                                    | -0,062                     | 0,434                 | -0,076               | 2                     | -0,069                 |
| uracil_degradation                                                                  | 0                          | 0                     | 0                    | 3                     | 0                      |
| urate_biosynthesisinosine_5-phosphate_degradation                                   | 0,017                      | 0,008                 | 0,001                | 6                     | 0,009                  |
| urea_cycle                                                                          | 0,009                      | 0,028                 | -0,094               | 5                     | -0,042                 |
| UTP_and_CTP_dephosphorylation_I                                                     | 0,076                      | 0,015                 | 0,035                | 3                     | 0,056                  |
| UTP_and_CTP_dephosphorylation_II                                                    | -0,047                     | 0,124                 | 0,001                | 4                     | -0,023                 |
| UTP_and_CTP_ide_novoi_biosynthesis                                                  | 0,003                      | -0,015                | -0,022               | 12                    | -0,009                 |
| valine_degradation                                                                  | -0,096                     | -0,013                | -0,040               | 13                    | -0,068                 |
| VEGF_Pathway                                                                        | 0,013                      | -0,037                | 0,016                | 77                    | 0,014                  |
| VEGF_Pathway_Actin_Reorganization                                                   | 0,059                      | -0,102                | 0,034                | 8                     | 0,046                  |
| VEGF_Pathway_Cell_Migration                                                         | 0,059                      | -0,102                | 0,034                | 8                     | 0,046                  |
| VEGF_Pathway_Cell_Survival                                                          | 0,017                      | 0,046                 | -0,008               | 15                    | 0,004                  |
| VEGF_Pathway_Focal_Adhesion_Turnover                                                | 0,053                      | -0,154                | 0,019                | 5                     | 0,036                  |
| VEGF_Pathway_Gene_Expression_and_Cell_Proliferation_via_MAPK7                       | 0,049                      | -0,105                | 0,033                | 12                    | 0,041                  |
| VEGF_Pathway_Nitric_Oxide_Production                                                | -0,002                     | -0,080                | 0,004                | 3                     | 0,001                  |
| VEGF_Pathway_Prostaglandin_Production                                               | 0,037                      | -0,092                | 0,028                | 20                    | 0,033                  |

| Pathway                                                                   | Tumour_MDA_MB.231.Invasive | Tumour_AU565.Invasive | Tumour_T47D.Invasive | Number of genes in PW | Mean (MDA_MB.231_T47D) |
|---------------------------------------------------------------------------|----------------------------|-----------------------|----------------------|-----------------------|------------------------|
| VEGFR2_Signaling                                                          | -0,004                     | 0,000                 | 0,020                | 94                    | 0,008                  |
| WNT_Pathway                                                               | -0,004                     | -0,022                | 0,014                | 253                   | 0,005                  |
| WNT_Pathway_Cell_Fate_Proliferation_Differentiation_Adhesion_and_Survival | -0,009                     | 0,013                 | 0,003                | 87                    | -0,003                 |
| WNT_Pathway_Cell_Survival                                                 | 0,043                      | -0,080                | 0,036                | 19                    | 0,040                  |
| WNT_Pathway_Cytoskeletal_Rearrangement                                    | -0,071                     | 0,122                 | -0,035               | 4                     | -0,053                 |
| WNT_Pathway_Gene_Expression_via_CREB3                                     | -0,013                     | -0,028                | 0,023                | 51                    | 0,005                  |
| WNT_Pathway_NFAT_Pathway                                                  | -0,006                     | 0,021                 | 0,039                | 21                    | 0,016                  |
| WNT_Pathway_PKC_Pathway                                                   | -0,007                     | -0,048                | 0,020                | 54                    | 0,006                  |
| wybutosine_biosynthesis                                                   | -0,132                     | 1,761                 | -0,125               | 3                     | -0,129                 |
| zymosterol_biosynthesis                                                   | -0,032                     | -0,340                | 0,106                | 6                     | 0,037                  |

SUPPLEMENTARY TABLE 2.

| NAME                                                       | GS<br><a href="#">follow link to MSigDB</a>                | GS<br>DETAILS | SIZE | ES    | NES   | NOM<br>p-val | FDR<br>q-val | FWER<br>p-val | RANK<br>AT<br>MAX | LEADING EDGE                    |
|------------------------------------------------------------|------------------------------------------------------------|---------------|------|-------|-------|--------------|--------------|---------------|-------------------|---------------------------------|
| GO_CONTRACTILE_FIBER                                       | GO_CONTRACTILE_FIBER                                       | Details ...   | 23   | 0.611 | 2.104 | 0            | 0.284        | 0.241         | 104               | tags=57%, list=18%, signal=66%  |
| GO_DEVELOPMENTAL_PROCESS_INVOLVED_IN_REPRODUCTION          | GO_DEVELOPMENTAL_PROCESS_INVOLVED_IN_REPRODUCTION          | Details ...   | 19   | 0.629 | 2.053 | 0.004        | 0.273        | 0.419         | 90                | tags=42%, list=16%, signal=48%  |
| GO_CELLULAR_CHEMICAL_HOMEOSTASIS                           | GO_CELLULAR_CHEMICAL_HOMEOSTASIS                           | Details ...   | 21   | 0.553 | 1.885 | 0.009        | 1            | 0.951         | 48                | tags=33%, list=8%, signal=35%   |
| GO_GAMETE_GENERATION                                       | GO_GAMETE_GENERATION                                       | Details ...   | 16   | 0.604 | 1.859 | 0.008        | 0.932        | 0.976         | 18                | tags=13%, list=3%, signal=13%   |
| GO_SEXUAL_REPRODUCTION                                     | GO_SEXUAL_REPRODUCTION                                     | Details ...   | 17   | 0.581 | 1.844 | 0.020        | 0.837        | 0.987         | 18                | tags=12%, list=3%, signal=12%   |
| GO_NEGATIVE_REGULATION_OF_GENE_EXPRESSION                  | GO_NEGATIVE_REGULATION_OF_GENE_EXPRESSION                  | Details ...   | 54   | 0.465 | 1.820 | 0.003        | 0.836        | 0.996         | 142               | tags=41%, list=25%, signal=49%  |
| GO_REGULATION_OF_GROWTH                                    | GO_REGULATION_OF_GROWTH                                    | Details ...   | 24   | 0.527 | 1.818 | 0.02         | 0.725        | 0.996         | 59                | tags=33%, list=10%, signal=36%  |
| GO_CELL_JUNCTION                                           | GO_CELL_JUNCTION                                           | Details ...   | 78   | 0.442 | 1.811 | 0.002        | 0.666        | 0.997         | 203               | tags=58%, list=36%, signal=77%  |
| GO_CELL_SUBSTRATE_JUNCTION                                 | GO_CELL_SUBSTRATE_JUNCTION                                 | Details ...   | 55   | 0.459 | 1.811 | 0.005        | 0.593        | 0.997         | 196               | tags=60%, list=34%, signal=83%  |
| GO_RIBONUCLEOPROTEIN_COMPLEX                               | GO_RIBONUCLEOPROTEIN_COMPLEX                               | Details ...   | 15   | 0.584 | 1.803 | 0.028        | 0.567        | 0.998         | 0                 | tags=7%, list=0%, signal=6%     |
| GO_CELLULAR_HOMEOSTASIS                                    | GO_CELLULAR_HOMEOSTASIS                                    | Details ...   | 28   | 0.506 | 1.796 | 0.022        | 0.539        | 0.999         | 21                | tags=25%, list=4%, signal=25%   |
| GO_MULTI_ORGANISM_REPRODUCTIVE_PROCESS                     | GO_MULTI_ORGANISM_REPRODUCTIVE_PROCESS                     | Details ...   | 20   | 0.540 | 1.786 | 0.019        | 0.531        | 0.999         | 36                | tags=15%, list=6%, signal=15%   |
| GO_MUSCLE_ORGAN_DEVELOPMENT                                | GO_MUSCLE_ORGAN_DEVELOPMENT                                | Details ...   | 16   | 0.570 | 1.770 | 0.021        | 0.546        | 0.999         | 155               | tags=63%, list=27%, signal=83%  |
| GO_MULTICELLULAR_ORGANISM_REPRODUCTION                     | GO_MULTICELLULAR_ORGANISM_REPRODUCTION                     | Details ...   | 20   | 0.538 | 1.767 | 0.024        | 0.521        | 1             | 36                | tags=15%, list=6%, signal=15%   |
| GO_CELL_DEVELOPMENT                                        | GO_CELL_DEVELOPMENT                                        | Details ...   | 64   | 0.441 | 1.764 | 0.002        | 0.494        | 1             | 75                | tags=23%, list=13%, signal=24%  |
| GO_ORGAN_MORPHOGENESIS                                     | GO_ORGAN_MORPHOGENESIS                                     | Details ...   | 32   | 0.485 | 1.755 | 0.008        | 0.490        | 1             | 166               | tags=56%, list=29%, signal=75%  |
| GO_ION_HOMEOSTASIS                                         | GO_ION_HOMEOSTASIS                                         | Details ...   | 20   | 0.532 | 1.745 | 0.021        | 0.494        | 1             | 48                | tags=30%, list=8%, signal=32%   |
| GO_ANCHORING_JUNCTION                                      | GO_ANCHORING_JUNCTION                                      | Details ...   | 58   | 0.446 | 1.738 | 0            | 0.487        | 1             | 196               | tags=59%, list=34%, signal=80%  |
| GO_MUSCLE_STRUCTURE_DEVELOPMENT                            | GO_MUSCLE_STRUCTURE_DEVELOPMENT                            | Details ...   | 34   | 0.480 | 1.727 | 0.015        | 0.497        | 1             | 160               | tags=53%, list=28%, signal=69%  |
| GO_CELL_PROJECTION_PART                                    | GO_CELL_PROJECTION_PART                                    | Details ...   | 47   | 0.433 | 1.700 | 0.013        | 0.553        | 1             | 199               | tags=57%, list=35%, signal=81%  |
| GO_REGULATION_OF_CELLULAR_AMIDE_METABOLIC_PROCESS          | GO_REGULATION_OF_CELLULAR_AMIDE_METABOLIC_PROCESS          |               | 15   | 0.553 | 1.689 | 0.032        | 0.563        | 1             | 0                 | tags=7%, list=0%, signal=6%     |
| GO_STRUCTURAL_MOLECULE_ACTIVITY                            | GO_STRUCTURAL_MOLECULE_ACTIVITY                            |               | 39   | 0.453 | 1.689 | 0.018        | 0.537        | 1             | 94                | tags=38%, list=17%, signal=43%  |
| GO_CYTOSKELETAL_PROTEIN_BINDING                            | GO_CYTOSKELETAL_PROTEIN_BINDING                            |               | 73   | 0.418 | 1.687 | 0.006        | 0.518        | 1             | 196               | tags=55%, list=34%, signal=73%  |
| GO_REPRODUCTION                                            | GO_REPRODUCTION                                            |               | 38   | 0.450 | 1.668 | 0.024        | 0.554        | 1             | 90                | tags=26%, list=16%, signal=29%  |
| GO_CHEMICAL_HOMEOSTASIS                                    | GO_CHEMICAL_HOMEOSTASIS                                    |               | 29   | 0.473 | 1.663 | 0.033        | 0.548        | 1             | 48                | tags=28%, list=8%, signal=29%   |
| GO_CYTOSKELETON                                            | GO_CYTOSKELETON                                            |               | 128  | 0.396 | 1.661 | 0            | 0.533        | 1             | 203               | tags=52%, list=36%, signal=63%  |
| GO_POSTTRANSCRIPTIONAL_REGULATION_OF_GENE_EXPRESSION       | GO_POSTTRANSCRIPTIONAL_REGULATION_OF_GENE_EXPRESSION       |               | 17   | 0.526 | 1.650 | 0.055        | 0.544        | 1             | 0                 | tags=6%, list=0%, signal=6%     |
| GO_REGULATION_OF_I_KAPPAB_KINASE_NF_KAPPAB_SIGNALING       | GO_REGULATION_OF_I_KAPPAB_KINASE_NF_KAPPAB_SIGNALING       |               | 15   | 0.527 | 1.635 | 0.043        | 0.569        | 1             | 206               | tags=73%, list=36%, signal=112% |
| GO_HOMEOSTATIC_PROCESS                                     | GO_HOMEOSTATIC_PROCESS                                     |               | 50   | 0.404 | 1.577 | 0.038        | 0.738        | 1             | 160               | tags=44%, list=28%, signal=56%  |
| GO_ACTIN_BINDING                                           | GO_ACTIN_BINDING                                           |               | 50   | 0.410 | 1.577 | 0.033        | 0.716        | 1             | 196               | tags=56%, list=34%, signal=78%  |
| GO_KINASE_BINDING                                          | GO_KINASE_BINDING                                          |               | 32   | 0.426 | 1.536 | 0.060        | 0.848        | 1             | 193               | tags=50%, list=34%, signal=71%  |
| GO_CELL_MORPHOGENESIS_INVOLVED_IN_DIFFERENTIATION          | GO_CELL_MORPHOGENESIS_INVOLVED_IN_DIFFERENTIATION          |               | 21   | 0.463 | 1.534 | 0.074        | 0.827        | 1             | 59                | tags=29%, list=10%, signal=31%  |
| GO_TRANSCRIPTION_FACTOR_ACTIVITY_PROTEIN_BINDING           | GO_TRANSCRIPTION_FACTOR_ACTIVITY_PROTEIN_BINDING           |               | 22   | 0.455 | 1.533 | 0.065        | 0.806        | 1             | 120               | tags=41%, list=21%, signal=50%  |
| GO_SINGLE_ORGANISM_CELL_ADHESION                           | GO_SINGLE_ORGANISM_CELL_ADHESION                           |               | 37   | 0.410 | 1.533 | 0.035        | 0.784        | 1             | 266               | tags=76%, list=47%, signal=133% |
| GO_ACTIN_CYTOSKELETON                                      | GO_ACTIN_CYTOSKELETON                                      |               | 55   | 0.394 | 1.530 | 0.034        | 0.773        | 1             | 135               | tags=40%, list=24%, signal=47%  |
| GO_TISSUE_DEVELOPMENT                                      | GO_TISSUE_DEVELOPMENT                                      |               | 71   | 0.379 | 1.527 | 0.027        | 0.762        | 1             | 193               | tags=49%, list=34%, signal=65%  |
| GO_RESPONSE_TO_GROWTH_FACTOR                               | GO_RESPONSE_TO_GROWTH_FACTOR                               |               | 19   | 0.469 | 1.513 | 0.078        | 0.791        | 1             | 70                | tags=32%, list=12%, signal=35%  |
| GO_G_PROTEIN_COUPLED_RECEPTOR_SIGNALING_PATHWAY            | GO_G_PROTEIN_COUPLED_RECEPTOR_SIGNALING_PATHWAY            |               | 16   | 0.486 | 1.510 | 0.087        | 0.782        | 1             | 84                | tags=38%, list=15%, signal=43%  |
| GO_REGULATION_OF_TRANSMEMBRANE_TRANSPORT                   | GO_REGULATION_OF_TRANSMEMBRANE_TRANSPORT                   |               | 19   | 0.457 | 1.508 | 0.079        | 0.767        | 1             | 284               | tags=89%, list=50%, signal=173% |
| GO_CELL_CELL_SIGNALING                                     | GO_CELL_CELL_SIGNALING                                     |               | 17   | 0.471 | 1.503 | 0.071        | 0.767        | 1             | 108               | tags=47%, list=19%, signal=56%  |
| GO_MUSCLE_CONTRACTION                                      | GO_MUSCLE_CONTRACTION                                      |               | 16   | 0.483 | 1.503 | 0.085        | 0.751        | 1             | 142               | tags=56%, list=25%, signal=73%  |
| GO_EPITHELIUM_DEVELOPMENT                                  | GO_EPITHELIUM_DEVELOPMENT                                  |               | 44   | 0.387 | 1.498 | 0.057        | 0.749        | 1             | 193               | tags=50%, list=34%, signal=70%  |
| GO_NEURON_PROJECTION                                       | GO_NEURON_PROJECTION                                       |               | 39   | 0.409 | 1.497 | 0.056        | 0.733        | 1             | 99                | tags=31%, list=17%, signal=35%  |
| REACTOME_CELL_CELL_COMMUNICATION                           | REACTOME_CELL_CELL_COMMUNICATION                           |               | 16   | 0.485 | 1.496 | 0.082        | 0.722        | 1             | 260               | tags=88%, list=46%, signal=157% |
| GO_STRIATED_MUSCLE_CELL_DIFFERENTIATION                    | GO_STRIATED_MUSCLE_CELL_DIFFERENTIATION                    |               | 18   | 0.468 | 1.495 | 0.094        | 0.708        | 1             | 112               | tags=44%, list=20%, signal=54%  |
| GO_POSITIVE_REGULATION_OF_MULTICELLULAR_ORGANISMAL_PROCESS | GO_POSITIVE_REGULATION_OF_MULTICELLULAR_ORGANISMAL_PROCESS |               | 51   | 0.386 | 1.489 | 0.052        | 0.712        | 1             | 132               | tags=37%, list=23%, signal=44%  |

| NAME                                                          | GS<br> follow link to MSigDB                                  | GS<br>DETAILS | SIZE | ES    | NES   | NOM<br>p-val | FDR<br>q-val | FWER<br>p-val | RANK<br>AT<br>MAX | LEADING EDGE                    |
|---------------------------------------------------------------|---------------------------------------------------------------|---------------|------|-------|-------|--------------|--------------|---------------|-------------------|---------------------------------|
| GO_REGULATORY_REGION_NUCLEIC_ACID_BINDING                     | GO_REGULATORY_REGION_NUCLEIC_ACID_BINDING                     |               | 18   | 0.463 | 1.486 | 0.092        | 0.706        | 1             | 68                | tags=33%, list=12%, signal=37%  |
| GO_NEURON_PART                                                | GO_NEURON_PART                                                |               | 48   | 0.382 | 1.486 | 0.062        | 0.692        | 1             | 108               | tags=31%, list=19%, signal=35%  |
| GO_CILIUM                                                     | GO_CILIUM                                                     |               | 16   | 0.477 | 1.485 | 0.077        | 0.681        | 1             | 170               | tags=63%, list=30%, signal=87%  |
| GO_CELL_PROJECTION                                            | GO_CELL_PROJECTION                                            |               | 89   | 0.361 | 1.479 | 0.025        | 0.687        | 1             | 203               | tags=49%, list=36%, signal=65%  |
| GO_POSITIVE_REGULATION_OF_CYTOKINE_PRODUCTION                 | GO_POSITIVE_REGULATION_OF_CYTOKINE_PRODUCTION                 |               | 18   | 0.450 | 1.478 | 0.083        | 0.676        | 1             | 131               | tags=44%, list=23%, signal=56%  |
| GO_NEGATIVE_REGULATION_OF_NITROGEN_COMPOUND_METABOLIC_PROCESS | GO_NEGATIVE_REGULATION_OF_NITROGEN_COMPOUND_METABOLIC_PROCESS |               | 56   | 0.380 | 1.475 | 0.060        | 0.671        | 1             | 142               | tags=39%, list=25%, signal=47%  |
| GO_EPITHELIAL_CELL_DIFFERENTIATION                            | GO_EPITHELIAL_CELL_DIFFERENTIATION                            |               | 21   | 0.445 | 1.475 | 0.104        | 0.658        | 1             | 171               | tags=52%, list=30%, signal=72%  |
| GO_ANATOMICAL_STRUCTURE_FORMATION_INVOLVED_IN_MORPHOGENESIS   | GO_ANATOMICAL_STRUCTURE_FORMATION_INVOLVED_IN_MORPHOGENESIS   |               | 47   | 0.390 | 1.473 | 0.062        | 0.651        | 1             | 89                | tags=30%, list=16%, signal=32%  |
| GO_CATION_TRANSPORT                                           | GO_CATION_TRANSPORT                                           |               | 19   | 0.443 | 1.473 | 0.102        | 0.641        | 1             | 48                | tags=26%, list=8%, signal=28%   |
| GO_SUPRAMOLECULAR_FIBER                                       | GO_SUPRAMOLECULAR_FIBER                                       |               | 38   | 0.399 | 1.472 | 0.096        | 0.630        | 1             | 152               | tags=42%, list=27%, signal=54%  |
| GO_ION_TRANSPORT                                              | GO_ION_TRANSPORT                                              |               | 28   | 0.414 | 1.466 | 0.093        | 0.639        | 1             | 108               | tags=36%, list=19%, signal=42%  |
| GO_SIGNAL_TRANSDUCER_ACTIVITY                                 | GO_SIGNAL_TRANSDUCER_ACTIVITY                                 |               | 27   | 0.413 | 1.466 | 0.094        | 0.628        | 1             | 188               | tags=56%, list=33%, signal=79%  |
| GO_POSITIVE_REGULATION_OF_CELL_PROLIFERATION                  | GO_POSITIVE_REGULATION_OF_CELL_PROLIFERATION                  |               | 20   | 0.446 | 1.465 | 0.111        | 0.621        | 1             | 201               | tags=65%, list=35%, signal=97%  |
| GO_HEART_DEVELOPMENT                                          | GO_HEART_DEVELOPMENT                                          |               | 23   | 0.433 | 1.461 | 0.107        | 0.620        | 1             | 215               | tags=65%, list=38%, signal=101% |
| GO_RESPONSE_TO_PEPTIDE                                        | GO_RESPONSE_TO_PEPTIDE                                        |               | 15   | 0.471 | 1.460 | 0.092        | 0.612        | 1             | 114               | tags=47%, list=20%, signal=57%  |
| GO_ACTIN_FILAMENT_BASED_PROCESS                               | GO_ACTIN_FILAMENT_BASED_PROCESS                               |               | 51   | 0.374 | 1.460 | 0.066        | 0.603        | 1             | 199               | tags=51%, list=35%, signal=71%  |
| GO_CELLULAR_RESPONSE_TO_NITROGEN_COMPOUND                     | GO_CELLULAR_RESPONSE_TO_NITROGEN_COMPOUND                     |               | 22   | 0.429 | 1.459 | 0.101        | 0.597        | 1             | 137               | tags=45%, list=24%, signal=58%  |
| GO_CIRCULATORY_SYSTEM_DEVELOPMENT                             | GO_CIRCULATORY_SYSTEM_DEVELOPMENT                             |               | 38   | 0.395 | 1.458 | 0.084        | 0.589        | 1             | 215               | tags=61%, list=38%, signal=91%  |
| GO_CYTOSKELETAL_PART                                          | GO_CYTOSKELETAL_PART                                          |               | 92   | 0.358 | 1.457 | 0.03         | 0.583        | 1             | 203               | tags=50%, list=36%, signal=65%  |
| GO_NEGATIVE_REGULATION_OF_CELL_PROLIFERATION                  | GO_NEGATIVE_REGULATION_OF_CELL_PROLIFERATION                  |               | 19   | 0.445 | 1.456 | 0.105        | 0.577        | 1             | 131               | tags=42%, list=23%, signal=53%  |
| GO_EXTRACELLULAR_SPACE                                        | GO_EXTRACELLULAR_SPACE                                        |               | 35   | 0.412 | 1.454 | 0.092        | 0.576        | 1             | 196               | tags=57%, list=34%, signal=82%  |
| GO_MUSCLE_CELL_DIFFERENTIATION                                | GO_MUSCLE_CELL_DIFFERENTIATION                                |               | 20   | 0.435 | 1.449 | 0.087        | 0.579        | 1             | 112               | tags=40%, list=20%, signal=48%  |
| GO_POSITIVE_REGULATION_OF_CELL_ADHESION                       | GO_POSITIVE_REGULATION_OF_CELL_ADHESION                       |               | 15   | 0.467 | 1.448 | 0.108        | 0.574        | 1             | 188               | tags=60%, list=33%, signal=87%  |
| GO_CELL_CELL_JUNCTION                                         | GO_CELL_CELL_JUNCTION                                         |               | 24   | 0.420 | 1.447 | 0.104        | 0.567        | 1             | 196               | tags=58%, list=34%, signal=85%  |
| GO_CELLULAR_COMPONENT_MORPHOGENESIS                           | GO_CELLULAR_COMPONENT_MORPHOGENESIS                           |               | 45   | 0.377 | 1.442 | 0.080        | 0.574        | 1             | 59                | tags=22%, list=10%, signal=23%  |
| GO_MUSCLE_SYSTEM_PROCESS                                      | GO_MUSCLE_SYSTEM_PROCESS                                      |               | 19   | 0.455 | 1.435 | 0.098        | 0.583        | 1             | 142               | tags=53%, list=25%, signal=68%  |
| GO_CELL_SURFACE                                               | GO_CELL_SURFACE                                               |               | 23   | 0.417 | 1.435 | 0.107        | 0.576        | 1             | 178               | tags=57%, list=31%, signal=79%  |
| GO_TISSUE_MORPHOGENESIS                                       | GO_TISSUE_MORPHOGENESIS                                       |               | 23   | 0.419 | 1.434 | 0.120        | 0.571        | 1             | 89                | tags=30%, list=16%, signal=35%  |
| GO_ACTIN_FILAMENT                                             | GO_ACTIN_FILAMENT                                             |               | 15   | 0.464 | 1.422 | 0.113        | 0.596        | 1             | 49                | tags=27%, list=9%, signal=28%   |
| GO_CELL_PROJECTION_MEMBRANE                                   | GO_CELL_PROJECTION_MEMBRANE                                   |               | 16   | 0.449 | 1.416 | 0.106        | 0.603        | 1             | 193               | tags=63%, list=34%, signal=92%  |
| GO_BIOLOGICAL_ADHESION                                        | GO_BIOLOGICAL_ADHESION                                        |               | 60   | 0.361 | 1.415 | 0.076        | 0.597        | 1             | 266               | tags=68%, list=47%, signal=115% |
| GO_REGULATION_OF_ION_TRANSPORT                                | GO_REGULATION_OF_ION_TRANSPORT                                |               | 20   | 0.439 | 1.413 | 0.124        | 0.596        | 1             | 312               | tags=95%, list=55%, signal=203% |
| GO_ZINC_ION_BINDING                                           | GO_ZINC_ION_BINDING                                           |               | 49   | 0.364 | 1.410 | 0.108        | 0.594        | 1             | 133               | tags=35%, list=23%, signal=41%  |
| GO_ORGANELLE_ASSEMBLY                                         | GO_ORGANELLE_ASSEMBLY                                         |               | 30   | 0.391 | 1.409 | 0.109        | 0.589        | 1             | 75                | tags=27%, list=13%, signal=29%  |
| GO_TRANSITION_METAL_ION_BINDING                               | GO_TRANSITION_METAL_ION_BINDING                               |               | 64   | 0.354 | 1.405 | 0.066        | 0.594        | 1             | 81                | tags=25%, list=14%, signal=26%  |
| GO_ACTIN_BASED_CELL_PROJECTION                                | GO_ACTIN_BASED_CELL_PROJECTION                                |               | 16   | 0.461 | 1.403 | 0.117        | 0.592        | 1             | 269               | tags=88%, list=47%, signal=161% |
| GO_LEUKOCYTE_ACTIVATION                                       | GO_LEUKOCYTE_ACTIVATION                                       |               | 18   | 0.433 | 1.402 | 0.122        | 0.587        | 1             | 266               | tags=78%, list=47%, signal=141% |
| GO_CELL_CELL_ADHESION                                         | GO_CELL_CELL_ADHESION                                         |               | 36   | 0.384 | 1.402 | 0.093        | 0.581        | 1             | 266               | tags=72%, list=47%, signal=127% |
| GO_METAL_ION_TRANSPORT                                        | GO_METAL_ION_TRANSPORT                                        |               | 16   | 0.442 | 1.395 | 0.116        | 0.592        | 1             | 108               | tags=38%, list=19%, signal=45%  |
| GO_RESPONSE_TO_NITROGEN_COMPOUND                              | GO_RESPONSE_TO_NITROGEN_COMPOUND                              |               | 37   | 0.375 | 1.393 | 0.125        | 0.588        | 1             | 148               | tags=43%, list=26%, signal=55%  |
| GO_PLASMA_MEMBRANE_REGION                                     | GO_PLASMA_MEMBRANE_REGION                                     |               | 33   | 0.376 | 1.386 | 0.116        | 0.600        | 1             | 215               | tags=58%, list=38%, signal=87%  |
| GO_LEUKOCYTE_CELL_CELL_ADHESION                               | GO_LEUKOCYTE_CELL_CELL_ADHESION                               |               | 18   | 0.422 | 1.384 | 0.143        | 0.600        | 1             | 266               | tags=78%, list=47%, signal=141% |
| GO_REGULATION_OF_ANATOMICAL_STRUCTURE_MORPHOGENESIS           | GO_REGULATION_OF_ANATOMICAL_STRUCTURE_MORPHOGENESIS           |               | 55   | 0.354 | 1.367 | 0.112        | 0.637        | 1             | 188               | tags=47%, list=33%, signal=64%  |



| NAME                                                                    | GS<br> follow link to MSigDB                                            | GS DETAILS | SIZE | ES    | NES   | NOM p-val | FDR q-val | FWER p-val | RANK AT MAX | LEADING EDGE                    |
|-------------------------------------------------------------------------|-------------------------------------------------------------------------|------------|------|-------|-------|-----------|-----------|------------|-------------|---------------------------------|
| GO_CELLULAR_COMPONENT_ASSEMBLY_INVOLVED_IN_MORPHOGENESIS                | GO_CELLULAR_COMPONENT_ASSEMBLY_INVOLVED_IN_MORPHOGENESIS                |            | 17   | 0.426 | 1,363 | 0.140     | 0.640     | 1          | 75          | tags=29%, list=13%, signal=33%  |
| GO_CALCIIUM_ION_BINDING                                                 | GO_CALCIIUM_ION_BINDING                                                 |            | 25   | 0.391 | 1,358 | 0.155     | 0.647     | 1          | 160         | tags=48%, list=28%, signal=64%  |
| GO_REGULATION_OF_CELL_PROLIFERATION                                     | GO_REGULATION_OF_CELL_PROLIFERATION                                     |            | 47   | 0.355 | 1,352 | 0.138     | 0.656     | 1          | 160         | tags=43%, list=28%, signal=54%  |
| GO_NEGATIVE_REGULATION_OF_INTRACELLULAR_SIGNAL_TRANSDUCTION             | GO_NEGATIVE_REGULATION_OF_INTRACELLULAR_SIGNAL_TRANSDUCTION             |            | 21   | 0.402 | 1,351 | 0.157     | 0.652     | 1          | 111         | tags=33%, list=20%, signal=40%  |
| REACTOME_DEVELOPMENTAL_BIOLOGY                                          | REACTOME_DEVELOPMENTAL_BIOLOGY                                          |            | 28   | 0.382 | 1,342 | 0.141     | 0.671     | 1          | 246         | tags=68%, list=43%, signal=114% |
| GO_NEGATIVE_REGULATION_OF_TRANSCRIPTION_FROM_RNA_POLYMERASE_II_PROMOTER | GO_NEGATIVE_REGULATION_OF_TRANSCRIPTION_FROM_RNA_POLYMERASE_II_PROMOTER |            | 24   | 0.395 | 1,341 | 0.149     | 0.667     | 1          | 142         | tags=46%, list=25%, signal=58%  |
| REACTOME_AXON_GUIDANCE                                                  | REACTOME_AXON_GUIDANCE                                                  |            | 24   | 0.386 | 1,335 | 0.153     | 0.678     | 1          | 177         | tags=54%, list=31%, signal=75%  |
| GO_REGULATION_OF_CELLULAR_COMPONENT_MOVEMENT                            | GO_REGULATION_OF_CELLULAR_COMPONENT_MOVEMENT                            |            | 32   | 0.360 | 1,330 | 0.140     | 0.684     | 1          | 199         | tags=53%, list=35%, signal=77%  |
| GO_BLOOD_VESSEL_MORPHOGENESIS                                           | GO_BLOOD_VESSEL_MORPHOGENESIS                                           |            | 19   | 0.399 | 1,328 | 0.165     | 0.682     | 1          | 210         | tags=63%, list=37%, signal=97%  |
| GO_MUSCLE_TISSUE_DEVELOPMENT                                            | GO_MUSCLE_TISSUE_DEVELOPMENT                                            |            | 15   | 0.429 | 1,323 | 0.163     | 0.691     | 1          | 81          | tags=33%, list=14%, signal=38%  |
| GO_RESPONSE_TO_METAL_ION                                                | GO_RESPONSE_TO_METAL_ION                                                |            | 17   | 0.409 | 1,320 | 0.170     | 0.692     | 1          | 287         | tags=82%, list=50%, signal=161% |
| GO_REGULATION_OF_MULTIORGANISM_PROCESS                                  | GO_REGULATION_OF_MULTIORGANISM_PROCESS                                  |            | 15   | 0.439 | 1,320 | 0.151     | 0.686     | 1          | 57          | tags=27%, list=10%, signal=29%  |
| GO_RESPONSE_TO_REACTIVE_OXYGEN_SPECIES                                  | GO_RESPONSE_TO_REACTIVE_OXYGEN_SPECIES                                  |            | 17   | 0.411 | 1,319 | 0.161     | 0.682     | 1          | 131         | tags=41%, list=23%, signal=52%  |
| GO_MICROTUBULE_CYTOSKELETON                                             | GO_MICROTUBULE_CYTOSKELETON                                             |            | 52   | 0.333 | 1,318 | 0.141     | 0.677     | 1          | 201         | tags=52%, list=35%, signal=73%  |
| GO_POLY_A_RNA_BINDING                                                   | GO_POLY_A_RNA_BINDING                                                   |            | 35   | 0.366 | 1,314 | 0.184     | 0.681     | 1          | 70          | tags=14%, list=12%, signal=15%  |
| GO_REGULATION_OF_TRANSPORT                                              | GO_REGULATION_OF_TRANSPORT                                              |            | 62   | 0.328 | 1,314 | 0.143     | 0.677     | 1          | 189         | tags=47%, list=33%, signal=62%  |
| GO_REGULATION_OF_RESPONSE_TO_WOUNDING                                   | GO_REGULATION_OF_RESPONSE_TO_WOUNDING                                   |            | 15   | 0.430 | 1,313 | 0.175     | 0.672     | 1          | 144         | tags=47%, list=25%, signal=61%  |
| GO_CYTOSKELETON_ORGANIZATION                                            | GO_CYTOSKELETON_ORGANIZATION                                            |            | 68   | 0.324 | 1,312 | 0.124     | 0.668     | 1          | 199         | tags=46%, list=35%, signal=62%  |
| GO_REGULATION_OF_CELLULAR_COMPONENT_SIZE                                | GO_REGULATION_OF_CELLULAR_COMPONENT_SIZE                                |            | 15   | 0.429 | 1,312 | 0.164     | 0.662     | 1          | 98          | tags=40%, list=17%, signal=47%  |
| GO_WOUND_HEALING                                                        | GO_WOUND_HEALING                                                        |            | 28   | 0.370 | 1,310 | 0.164     | 0.661     | 1          | 156         | tags=43%, list=27%, signal=56%  |
| GO_LYMPHOCYTE_ACTIVATION                                                | GO_LYMPHOCYTE_ACTIVATION                                                |            | 17   | 0.415 | 1,309 | 0.170     | 0.657     | 1          | 266         | tags=76%, list=47%, signal=139% |
| GO_PROTEIN_DOMAIN_SPECIFIC_BINDING                                      | GO_PROTEIN_DOMAIN_SPECIFIC_BINDING                                      |            | 36   | 0.354 | 1,309 | 0.167     | 0.653     | 1          | 114         | tags=33%, list=20%, signal=39%  |
| GO_INNATE_IMMUNE_RESPONSE                                               | GO_INNATE_IMMUNE_RESPONSE                                               |            | 22   | 0.384 | 1,306 | 0.173     | 0.654     | 1          | 144         | tags=41%, list=25%, signal=53%  |
| GO_RESPONSE_TO_INORGANIC_SUBSTANCE                                      | GO_RESPONSE_TO_INORGANIC_SUBSTANCE                                      |            | 29   | 0.367 | 1,300 | 0.176     | 0.664     | 1          | 173         | tags=48%, list=30%, signal=66%  |
| GO_IMMUNE_RESPONSE                                                      | GO_IMMUNE_RESPONSE                                                      |            | 32   | 0.359 | 1,291 | 0.188     | 0.682     | 1          | 144         | tags=38%, list=25%, signal=47%  |
| GO_SECRETION                                                            | GO_SECRETION                                                            |            | 16   | 0.420 | 1,290 | 0.195     | 0.681     | 1          | 196         | tags=63%, list=34%, signal=93%  |
| GO_REGULATION_OF_PROTEIN_COMPLEX_DISASSEMBLY                            | GO_REGULATION_OF_PROTEIN_COMPLEX_DISASSEMBLY                            |            | 17   | 0.404 | 1,289 | 0.191     | 0.676     | 1          | 251         | tags=71%, list=44%, signal=123% |
| GO_VASCULATURE_DEVELOPMENT                                              | GO_VASCULATURE_DEVELOPMENT                                              |            | 20   | 0.380 | 1,286 | 0.170     | 0.678     | 1          | 310         | tags=85%, list=54%, signal=180% |
| GO_ANATOMICAL_STRUCTURE_HOMEOSTASIS                                     | GO_ANATOMICAL_STRUCTURE_HOMEOSTASIS                                     |            | 19   | 0.391 | 1,286 | 0.188     | 0.672     | 1          | 182         | tags=53%, list=32%, signal=75%  |
| GO_TUBE_DEVELOPMENT                                                     | GO_TUBE_DEVELOPMENT                                                     |            | 19   | 0.395 | 1,284 | 0.186     | 0.673     | 1          | 89          | tags=32%, list=16%, signal=36%  |
| GO_REGULATION_OF_MULTICELLULAR_ORGANISMAL_DEVELOPMENT                   | GO_REGULATION_OF_MULTICELLULAR_ORGANISMAL_DEVELOPMENT                   |            | 66   | 0.315 | 1,278 | 0.152     | 0.683     | 1          | 160         | tags=36%, list=28%, signal=45%  |
| GO_POSITIVE_REGULATION_OF_INTRACELLULAR_SIGNAL_TRANSDUCTION             | GO_POSITIVE_REGULATION_OF_INTRACELLULAR_SIGNAL_TRANSDUCTION             |            | 33   | 0.350 | 1,269 | 0.187     | 0.703     | 1          | 210         | tags=52%, list=37%, signal=77%  |
| GO_SYSTEM_PROCESS                                                       | GO_SYSTEM_PROCESS                                                       |            | 49   | 0.325 | 1,266 | 0.188     | 0.706     | 1          | 156         | tags=41%, list=27%, signal=51%  |
| GO_REGULATION_OF_CELL_MORPHOGENESIS                                     | GO_REGULATION_OF_CELL_MORPHOGENESIS                                     |            | 35   | 0.348 | 1,266 | 0.196     | 0.702     | 1          | 188         | tags=49%, list=33%, signal=68%  |
| GO_CELL_PROLIFERATION                                                   | GO_CELL_PROLIFERATION                                                   |            | 21   | 0.378 | 1,263 | 0.202     | 0.702     | 1          | 131         | tags=38%, list=23%, signal=48%  |
| GO_DEFENSE_RESPONSE                                                     | GO_DEFENSE_RESPONSE                                                     |            | 31   | 0.349 | 1,259 | 0.208     | 0.710     | 1          | 144         | tags=39%, list=25%, signal=49%  |
| GO_POSITIVE_REGULATION_OF_DEVELOPMENTAL_PROCESS                         | GO_POSITIVE_REGULATION_OF_DEVELOPMENTAL_PROCESS                         |            | 48   | 0.327 | 1,258 | 0.196     | 0.705     | 1          | 206         | tags=48%, list=36%, signal=69%  |
| GO_CELL_ACTIVATION                                                      | GO_CELL_ACTIVATION                                                      |            | 36   | 0.336 | 1,252 | 0.210     | 0.717     | 1          | 266         | tags=64%, list=47%, signal=112% |
| GO_NEGATIVE_REGULATION_OF_HYDROLASE_ACTIVITY                            | GO_NEGATIVE_REGULATION_OF_HYDROLASE_ACTIVITY                            |            | 15   | 0.406 | 1,250 | 0.229     | 0.718     | 1          | 90          | tags=33%, list=16%, signal=39%  |
| GO_REGULATION_OF_ANATOMICAL_STRUCTURE_SIZE                              | GO_REGULATION_OF_ANATOMICAL_STRUCTURE_SIZE                              |            | 19   | 0.377 | 1,249 | 0.209     | 0.714     | 1          | 166         | tags=47%, list=29%, signal=65%  |

| NAME                                                            | GS<br>follow link to MSigDB                                     | GS<br>DETAILS | SIZE | ES    | NES   | NOM<br>p-val | FDR<br>q-val | FWER<br>p-val | RANK<br>AT<br>MAX | LEADING EDGE                    |
|-----------------------------------------------------------------|-----------------------------------------------------------------|---------------|------|-------|-------|--------------|--------------|---------------|-------------------|---------------------------------|
| GO_NEGATIVE_REGULATION_OF_RESPONSE_TO_STIMULUS                  | GO_NEGATIVE_REGULATION_OF_RESPONSE_TO_STIMULUS                  |               | 52   | 0.324 | 1,244 | 0.194        | 0.724        | 1             | 213               | tags=50%, list=37%, signal=73%  |
| GO_RESPONSE_TO_STEROID_HORMONE                                  | GO_RESPONSE_TO_STEROID_HORMONE                                  |               | 19   | 0.380 | 1,243 | 0.215        | 0.720        | 1             | 99                | tags=37%, list=17%, signal=43%  |
| GO_MOVEMENT_OF_CELL_OR_SUBCELLULAR_COMPONENT                    | GO_MOVEMENT_OF_CELL_OR_SUBCELLULAR_COMPONENT                    |               | 70   | 0.309 | 1,240 | 0.194        | 0.722        | 1             | 85                | tags=24%, list=15%, signal=25%  |
| GO_CELL_MOTILITY                                                | GO_CELL_MOTILITY                                                |               | 40   | 0.327 | 1,238 | 0.226        | 0.724        | 1             | 199               | tags=48%, list=35%, signal=68%  |
| GO_APOPTOTIC_SIGNALING_PATHWAY                                  | GO_APOPTOTIC_SIGNALING_PATHWAY                                  |               | 16   | 0.399 | 1,236 | 0.230        | 0.722        | 1             | 185               | tags=50%, list=33%, signal=72%  |
| GO_SYNAPSE                                                      | GO_SYNAPSE                                                      |               | 29   | 0.349 | 1,226 | 0.223        | 0.744        | 1             | 334               | tags=86%, list=59%, signal=198% |
| GO_RESPONSE_TO_OXIDATIVE_STRESS                                 | GO_RESPONSE_TO_OXIDATIVE_STRESS                                 |               | 22   | 0.361 | 1,223 | 0.229        | 0.747        | 1             | 148               | tags=41%, list=26%, signal=53%  |
| GO_CELL_DEATH                                                   | GO_CELL_DEATH                                                   |               | 41   | 0.321 | 1,220 | 0.243        | 0.751        | 1             | 198               | tags=46%, list=35%, signal=66%  |
| GO_NEGATIVE_REGULATION_OF_TRANSPORT                             | GO_NEGATIVE_REGULATION_OF_TRANSPORT                             |               | 17   | 0.382 | 1,217 | 0.240        | 0.753        | 1             | 210               | tags=59%, list=37%, signal=90%  |
| GO_IN_UTERO_EMBRYONIC_DEVELOPMENT                               | GO_IN_UTERO_EMBRYONIC_DEVELOPMENT                               |               | 15   | 0.391 | 1,217 | 0.243        | 0.749        | 1             | 207               | tags=60%, list=36%, signal=92%  |
| GO_REGULATION_OF_SYSTEM_PROCESS                                 | GO_REGULATION_OF_SYSTEM_PROCESS                                 |               | 15   | 0.396 | 1,213 | 0.247        | 0.755        | 1             | 215               | tags=60%, list=38%, signal=94%  |
| GO_RESPONSE_TO_WOUNDING                                         | GO_RESPONSE_TO_WOUNDING                                         |               | 34   | 0.326 | 1,212 | 0.237        | 0.751        | 1             | 196               | tags=47%, list=34%, signal=67%  |
| GO_CELLULAR_RESPONSE_TO_ORGANIC_CYCLIC_COMPOUND                 | GO_CELLULAR_RESPONSE_TO_ORGANIC_CYCLIC_COMPOUND                 |               | 22   | 0.361 | 1,204 | 0.245        | 0.768        | 1             | 185               | tags=50%, list=33%, signal=71%  |
| GO_CELLULAR_RESPONSE_TO_ORGANIC_SUBSTANCE                       | GO_CELLULAR_RESPONSE_TO_ORGANIC_SUBSTANCE                       |               | 75   | 0.297 | 1,201 | 0.227        | 0.772        | 1             | 137               | tags=32%, list=24%, signal=37%  |
| GO_REGULATION_OF_INTRACELLULAR_SIGNAL_TRANSDUCTION              | GO_REGULATION_OF_INTRACELLULAR_SIGNAL_TRANSDUCTION              |               | 66   | 0.297 | 1,191 | 0.232        | 0.794        | 1             | 213               | tags=47%, list=37%, signal=66%  |
| GO_RECEPTOR_BINDING                                             | GO_RECEPTOR_BINDING                                             |               | 46   | 0.313 | 1,184 | 0.266        | 0.810        | 1             | 215               | tags=50%, list=38%, signal=74%  |
| GO_HEAD_DEVELOPMENT                                             | GO_HEAD_DEVELOPMENT                                             |               | 22   | 0.355 | 1,181 | 0.269        | 0.811        | 1             | 114               | tags=32%, list=20%, signal=38%  |
| GO_RESPONSE_TO_CYTOKINE                                         | GO_RESPONSE_TO_CYTOKINE                                         |               | 27   | 0.333 | 1,178 | 0.278        | 0.815        | 1             | 130               | tags=33%, list=23%, signal=41%  |
| GO_RNA_BINDING                                                  | GO_RNA_BINDING                                                  |               | 55   | 0.303 | 1,175 | 0.277        | 0.819        | 1             | 15                | tags=5%, list=3%, signal=5%     |
| GO_CELLULAR_RESPONSE_TO_ENDOGENOUS_STIMULUS                     | GO_CELLULAR_RESPONSE_TO_ENDOGENOUS_STIMULUS                     |               | 43   | 0.307 | 1,172 | 0.274        | 0.822        | 1             | 121               | tags=30%, list=21%, signal=35%  |
| GO_RESPONSE_TO_ORGANIC_CYCLIC_COMPOUND                          | GO_RESPONSE_TO_ORGANIC_CYCLIC_COMPOUND                          |               | 36   | 0.316 | 1,169 | 0.284        | 0.825        | 1             | 210               | tags=50%, list=37%, signal=74%  |
| GO_SECRETION_BY_CELL                                            | GO_SECRETION_BY_CELL                                            |               | 15   | 0.383 | 1,165 | 0.291        | 0.830        | 1             | 196               | tags=60%, list=34%, signal=89%  |
| GO_EXTRACELLULAR_STRUCTURE_ORGANIZATION                         | GO_EXTRACELLULAR_STRUCTURE_ORGANIZATION                         |               | 15   | 0.372 | 1,159 | 0.315        | 0.842        | 1             | 343               | tags=93%, list=60%, signal=229% |
| GO_REGULATION_OF_CELL_ADHESION                                  | GO_REGULATION_OF_CELL_ADHESION                                  |               | 27   | 0.330 | 1,157 | 0.301        | 0.845        | 1             | 133               | tags=33%, list=23%, signal=41%  |
| GO_REGULATION_OF_ACTIN_FILAMENT_BASED_PROCESS                   | GO_REGULATION_OF_ACTIN_FILAMENT_BASED_PROCESS                   |               | 20   | 0.353 | 1,155 | 0.284        | 0.845        | 1             | 297               | tags=75%, list=52%, signal=151% |
| GO_POSITIVE_REGULATION_OF_TRANSPORT                             | GO_POSITIVE_REGULATION_OF_TRANSPORT                             |               | 40   | 0.309 | 1,151 | 0.309        | 0.850        | 1             | 189               | tags=48%, list=33%, signal=66%  |
| GO_CELLULAR_RESPONSE_TO_OXYGEN_CONTAINING_COMPOUND              | GO_CELLULAR_RESPONSE_TO_OXYGEN_CONTAINING_COMPOUND              |               | 36   | 0.311 | 1,150 | 0.296        | 0.848        | 1             | 137               | tags=33%, list=24%, signal=41%  |
| GO_PERINUCLEAR_REGION_OF_CYTOPLASM                              | GO_PERINUCLEAR_REGION_OF_CYTOPLASM                              |               | 38   | 0.302 | 1,146 | 0.328        | 0.856        | 1             | 269               | tags=63%, list=47%, signal=112% |
| GO_IMMUNE_SYSTEM_PROCESS                                        | GO_IMMUNE_SYSTEM_PROCESS                                        |               | 76   | 0.282 | 1,144 | 0.285        | 0.854        | 1             | 256               | tags=54%, list=45%, signal=85%  |
| GO_POSITIVE_REGULATION_OF_PROTEOLYSIS                           | GO_POSITIVE_REGULATION_OF_PROTEOLYSIS                           |               | 15   | 0.366 | 1,143 | 0.313        | 0.852        | 1             | 112               | tags=33%, list=20%, signal=40%  |
| GO_CENTRAL_NERVOUS_SYSTEM_DEVELOPMENT                           | GO_CENTRAL_NERVOUS_SYSTEM_DEVELOPMENT                           |               | 24   | 0.329 | 1,142 | 0.312        | 0.851        | 1             | 114               | tags=29%, list=20%, signal=35%  |
| GO_RUFFLE                                                       | GO_RUFFLE                                                       |               | 19   | 0.344 | 1,142 | 0.313        | 0.845        | 1             | 196               | tags=47%, list=34%, signal=70%  |
| GO_NUCLEOPLASM_PART                                             | GO_NUCLEOPLASM_PART                                             |               | 23   | 0.343 | 1,140 | 0.313        | 0.845        | 1             | 228               | tags=57%, list=40%, signal=91%  |
| GO_PROTEIN_OLIGOMERIZATION                                      | GO_PROTEIN_OLIGOMERIZATION                                      |               | 18   | 0.357 | 1,139 | 0.3          | 0.841        | 1             | 267               | tags=72%, list=47%, signal=132% |
| GO_CELLULAR_RESPONSE_TO_HORMONE_STIMULUS                        | GO_CELLULAR_RESPONSE_TO_HORMONE_STIMULUS                        |               | 20   | 0.346 | 1,137 | 0.309        | 0.842        | 1             | 246               | tags=65%, list=43%, signal=110% |
| GO_MICROTUBULE                                                  | GO_MICROTUBULE                                                  |               | 18   | 0.357 | 1,137 | 0.317        | 0.837        | 1             | 152               | tags=44%, list=27%, signal=59%  |
| GO_COFACTOR_METABOLIC_PROCESS                                   | GO_COFACTOR_METABOLIC_PROCESS                                   |               | 25   | 0.323 | 1,131 | 0.309        | 0.849        | 1             | 339               | tags=84%, list=60%, signal=199% |
| GO_NEUROLOGICAL_SYSTEM_PROCESS                                  | GO_NEUROLOGICAL_SYSTEM_PROCESS                                  |               | 24   | 0.329 | 1,131 | 0.321        | 0.845        | 1             | 156               | tags=42%, list=27%, signal=55%  |
| GO_POSITIVE_REGULATION_OF_CELL_COMMUNICATION                    | GO_POSITIVE_REGULATION_OF_CELL_COMMUNICATION                    |               | 54   | 0.289 | 1,129 | 0.319        | 0.845        | 1             | 169               | tags=37%, list=30%, signal=48%  |
| GO_REGULATION_OF_CELL_DIFFERENTIATION                           | GO_REGULATION_OF_CELL_DIFFERENTIATION                           |               | 52   | 0.287 | 1,123 | 0.320        | 0.857        | 1             | 210               | tags=46%, list=37%, signal=66%  |
| GO_REGULATION_OF_CELL_MORPHOGENESIS_INVOLVED_IN_DIFFERENTIATION | GO_REGULATION_OF_CELL_MORPHOGENESIS_INVOLVED_IN_DIFFERENTIATION |               | 16   | 0.355 | 1,123 | 0.312        | 0.853        | 1             | 210               | tags=56%, list=37%, signal=87%  |

| NAME                                                           | GS<br> follow link to MSigDB                                   | GS DETAILS | SIZE | ES    | NES   | NOM p-val | FDR q-val | FWER p-val | RANK AT MAX | LEADING EDGE                    |
|----------------------------------------------------------------|----------------------------------------------------------------|------------|------|-------|-------|-----------|-----------|------------|-------------|---------------------------------|
| GO_NEGATIVE_REGULATION_OF_CELLULAR_COMPONENT_ORGANIZATION      | GO_NEGATIVE_REGULATION_OF_CELLULAR_COMPONENT_ORGANIZATION      |            | 26   | 0.316 | 1,121 | 0.325     | 0.853     | 1          | 188         | tags=46%, list=33%, signal=66%  |
| GO_NEURON_DIFFERENTIATION                                      | GO_NEURON_DIFFERENTIATION                                      |            | 27   | 0.317 | 1,120 | 0.329     | 0.851     | 1          | 100         | tags=26%, list=18%, signal=30%  |
| GO_POSITIVE_REGULATION_OF_LOCOMOTION                           | GO_POSITIVE_REGULATION_OF_LOCOMOTION                           |            | 18   | 0.352 | 1,119 | 0.349     | 0.847     | 1          | 177         | tags=44%, list=31%, signal=62%  |
| GO_RESPONSE_TO_ENDOGENOUS_STIMULUS                             | GO_RESPONSE_TO_ENDOGENOUS_STIMULUS                             |            | 60   | 0.282 | 1,119 | 0.314     | 0.843     | 1          | 137         | tags=32%, list=24%, signal=37%  |
| GO_LOCOMOTION                                                  | GO_LOCOMOTION                                                  |            | 48   | 0.290 | 1,119 | 0.347     | 0.839     | 1          | 112         | tags=27%, list=20%, signal=31%  |
| GO_REGULATION_OF_TRANSCRIPTION_FROM_RNA_POLYMERASE_II_PROMOTER | GO_REGULATION_OF_TRANSCRIPTION_FROM_RNA_POLYMERASE_II_PROMOTER |            | 55   | 0.285 | 1,116 | 0.344     | 0.842     | 1          | 172         | tags=40%, list=30%, signal=52%  |
| GO_NEURON_PROJECTION_DEVELOPMENT                               | GO_NEURON_PROJECTION_DEVELOPMENT                               |            | 23   | 0.330 | 1,112 | 0.337     | 0.848     | 1          | 72          | tags=22%, list=13%, signal=24%  |
| GO_REGULATION_OF_PROTEIN_CATABOLIC_PROCESS                     | GO_REGULATION_OF_PROTEIN_CATABOLIC_PROCESS                     |            | 21   | 0.332 | 1,112 | 0.342     | 0.844     | 1          | 250         | tags=62%, list=44%, signal=106% |
| GO_MEMBRANE_REGION                                             | GO_MEMBRANE_REGION                                             |            | 46   | 0.290 | 1,110 | 0.347     | 0.845     | 1          | 215         | tags=48%, list=38%, signal=71%  |
| GO_CELLULAR_PROTEIN_COMPLEX_ASSEMBLY                           | GO_CELLULAR_PROTEIN_COMPLEX_ASSEMBLY                           |            | 15   | 0.358 | 1,107 | 0.335     | 0.848     | 1          | 52          | tags=20%, list=9%, signal=21%   |
| GO_PROTEIN_SERINE_THREONINE_KINASE_ACTIVITY                    | GO_PROTEIN_SERINE_THREONINE_KINASE_ACTIVITY                    |            | 20   | 0.335 | 1,105 | 0.333     | 0.849     | 1          | 213         | tags=55%, list=37%, signal=85%  |
| GO_CHROMOSOME_ORGANIZATION                                     | GO_CHROMOSOME_ORGANIZATION                                     |            | 33   | 0.304 | 1,104 | 0.353     | 0.845     | 1          | 151         | tags=36%, list=27%, signal=47%  |
| GO_INTRINSIC_COMPONENT_OF_PLASMA_MEMBRANE                      | GO_INTRINSIC_COMPONENT_OF_PLASMA_MEMBRANE                      |            | 23   | 0.331 | 1,104 | 0.359     | 0.842     | 1          | 70          | tags=22%, list=12%, signal=24%  |
| GO_RESPONSE_TO_HORMONE                                         | GO_RESPONSE_TO_HORMONE                                         |            | 36   | 0.299 | 1,100 | 0.36      | 0.847     | 1          | 248         | tags=58%, list=44%, signal=97%  |
| GO_RESPONSE_TO_BIOTIC_STIMULUS                                 | GO_RESPONSE_TO_BIOTIC_STIMULUS                                 |            | 24   | 0.316 | 1,098 | 0.349     | 0.848     | 1          | 119         | tags=33%, list=21%, signal=40%  |
| GO_MITOCHONDRIAL_ENVELOPE                                      | GO_MITOCHONDRIAL_ENVELOPE                                      |            | 16   | 0.349 | 1,095 | 0.363     | 0.851     | 1          | 118         | tags=38%, list=21%, signal=46%  |
| GO_VESICLE_MEMBRANE                                            | GO_VESICLE_MEMBRANE                                            |            | 22   | 0.327 | 1,095 | 0.346     | 0.847     | 1          | 84          | tags=27%, list=15%, signal=31%  |
| GO_DOUBLE_STRANDED_DNA_BINDING                                 | GO_DOUBLE_STRANDED_DNA_BINDING                                 |            | 18   | 0.341 | 1,089 | 0.370     | 0.858     | 1          | 137         | tags=39%, list=24%, signal=50%  |
| GO_NEUROGENESIS                                                | GO_NEUROGENESIS                                                |            | 50   | 0.280 | 1,089 | 0.364     | 0.855     | 1          | 100         | tags=24%, list=18%, signal=27%  |
| GO_PROTEIN_COMPLEX_SUBUNIT_ORGANIZATION                        | GO_PROTEIN_COMPLEX_SUBUNIT_ORGANIZATION                        |            | 73   | 0.269 | 1,087 | 0.369     | 0.854     | 1          | 269         | tags=58%, list=47%, signal=95%  |
| GO_SEQUENCE_SPECIFIC_DNA_BINDING                               | GO_SEQUENCE_SPECIFIC_DNA_BINDING                               |            | 16   | 0.346 | 1,084 | 0.376     | 0.859     | 1          | 130         | tags=38%, list=23%, signal=47%  |
| GO_ENZYME_BINDING                                              | GO_ENZYME_BINDING                                              |            | 88   | 0.260 | 1,083 | 0.380     | 0.857     | 1          | 201         | tags=38%, list=35%, signal=49%  |
| GO_CELLULAR_RESPONSE_TO_CYTOKINE_STIMULUS                      | GO_CELLULAR_RESPONSE_TO_CYTOKINE_STIMULUS                      |            | 17   | 0.342 | 1,082 | 0.385     | 0.854     | 1          | 130         | tags=35%, list=23%, signal=44%  |
| GO_SYNAPSE_PART                                                | GO_SYNAPSE_PART                                                |            | 22   | 0.322 | 1,081 | 0.373     | 0.852     | 1          | 312         | tags=77%, list=55%, signal=164% |
| GO_OXIDATION_REDUCTION_PROCESS                                 | GO_OXIDATION_REDUCTION_PROCESS                                 |            | 43   | 0.283 | 1,079 | 0.387     | 0.852     | 1          | 315         | tags=72%, list=55%, signal=149% |
| GO_HEMOSTASIS                                                  | GO_HEMOSTASIS                                                  |            | 23   | 0.321 | 1,077 | 0.386     | 0.853     | 1          | 112         | tags=30%, list=20%, signal=36%  |
| GO_PROTEIN_C_TERMINUS_BINDING                                  | GO_PROTEIN_C_TERMINUS_BINDING                                  |            | 16   | 0.348 | 1,077 | 0.381     | 0.850     | 1          | 210         | tags=56%, list=37%, signal=87%  |
| GO_NEGATIVE_REGULATION_OF_ORGANELLE_ORGANIZATION               | GO_NEGATIVE_REGULATION_OF_ORGANELLE_ORGANIZATION               |            | 19   | 0.327 | 1,077 | 0.376     | 0.846     | 1          | 188         | tags=47%, list=33%, signal=68%  |
| GO_POSITIVE_REGULATION_OF_GENE_EXPRESSION                      | GO_POSITIVE_REGULATION_OF_GENE_EXPRESSION                      |            | 54   | 0.276 | 1,075 | 0.381     | 0.846     | 1          | 185         | tags=43%, list=33%, signal=57%  |
| GO_LIPID_BIOSYNTHETIC_PROCESS                                  | GO_LIPID_BIOSYNTHETIC_PROCESS                                  |            | 22   | 0.321 | 1,072 | 0.388     | 0.849     | 1          | 193         | tags=50%, list=34%, signal=73%  |
| GO_CELL_JUNCTION_ASSEMBLY                                      | GO_CELL_JUNCTION_ASSEMBLY                                      |            | 18   | 0.332 | 1,071 | 0.383     | 0.848     | 1          | 282         | tags=72%, list=50%, signal=139% |
| GO_NEGATIVE_REGULATION_OF_DEVELOPMENTAL_PROCESS                | GO_NEGATIVE_REGULATION_OF_DEVELOPMENTAL_PROCESS                |            | 16   | 0.339 | 1,070 | 0.392     | 0.845     | 1          | 294         | tags=75%, list=52%, signal=151% |
| GO_PROTEIN_COMPLEX_BIOGENESIS                                  | GO_PROTEIN_COMPLEX_BIOGENESIS                                  |            | 48   | 0.275 | 1,066 | 0.388     | 0.853     | 1          | 267         | tags=58%, list=47%, signal=101% |
| GO_MORPHOGENESIS_OF_AN_EPITHELIUM                              | GO_MORPHOGENESIS_OF_AN_EPITHELIUM                              |            | 18   | 0.333 | 1,063 | 0.375     | 0.856     | 1          | 188         | tags=44%, list=33%, signal=64%  |
| GO_COENZYME_METABOLIC_PROCESS                                  | GO_COENZYME_METABOLIC_PROCESS                                  |            | 20   | 0.324 | 1,062 | 0.409     | 0.853     | 1          | 339         | tags=85%, list=60%, signal=203% |
| GO_POSITIVE_REGULATION_OF_PROTEIN_MODIFICATION_PROCESS         | GO_POSITIVE_REGULATION_OF_PROTEIN_MODIFICATION_PROCESS         |            | 37   | 0.282 | 1,062 | 0.391     | 0.851     | 1          | 201         | tags=46%, list=35%, signal=66%  |
| GO_PROTEIN_PHOSPHORYLATION                                     | GO_PROTEIN_PHOSPHORYLATION                                     |            | 37   | 0.283 | 1,056 | 0.413     | 0.860     | 1          | 238         | tags=54%, list=42%, signal=87%  |
| GO_RESPONSE_TO_OXYGEN_CONTAINING_COMPOUND                      | GO_RESPONSE_TO_OXYGEN_CONTAINING_COMPOUND                      |            | 59   | 0.268 | 1,056 | 0.409     | 0.856     | 1          | 137         | tags=31%, list=24%, signal=36%  |
| GO_IMMUNE_SYSTEM_DEVELOPMENT                                   | GO_IMMUNE_SYSTEM_DEVELOPMENT                                   |            | 26   | 0.306 | 1,053 | 0.412     | 0.859     | 1          | 266         | tags=62%, list=47%, signal=110% |
| GO_TRANSCRIPTION_FACTOR_BINDING                                | GO_TRANSCRIPTION_FACTOR_BINDING                                |            | 21   | 0.314 | 1,051 | 0.414     | 0.860     | 1          | 163         | tags=38%, list=29%, signal=51%  |
| GO_POSITIVE_REGULATION_OF_PHOSPHORUS_METABOLIC_PROCESS         | GO_POSITIVE_REGULATION_OF_PHOSPHORUS_METABOLIC_PROCESS         |            | 38   | 0.276 | 1,051 | 0.393     | 0.856     | 1          | 198         | tags=45%, list=35%, signal=64%  |

| NAME                                                   | GS<br>follow link to MSigDB                            | GS<br>DETAILS | SIZE | ES    | NES   | NOM<br>p-val | FDR<br>q-val | FWER<br>p-val | RANK<br>AT<br>MAX | LEADING EDGE                    |
|--------------------------------------------------------|--------------------------------------------------------|---------------|------|-------|-------|--------------|--------------|---------------|-------------------|---------------------------------|
| GO_ION_TRANSMEMBRANE_TRANSPORT                         | GO_ION_TRANSMEMBRANE_TRANSPORT                         |               | 15   | 0.345 | 1,049 | 0.416        | 0.857        | 1             | 13                | tags=13%, list=2%, signal=13%   |
| GO_CELLULAR_RESPONSE_TO_ABIOTIC_STIMULUS               | GO_CELLULAR_RESPONSE_TO_ABIOTIC_STIMULUS               |               | 15   | 0.348 | 1,048 | 0.417        | 0.855        | 1             | 276               | tags=73%, list=49%, signal=139% |
| GO_POSITIVE_REGULATION_OF_IMMUNE_SYSTEM_PROCESS        | GO_POSITIVE_REGULATION_OF_IMMUNE_SYSTEM_PROCESS        |               | 27   | 0.301 | 1,048 | 0.410        | 0.852        | 1             | 144               | tags=37%, list=25%, signal=47%  |
| GO_POSITIVE_REGULATION_OF_CELL_DIFFERENTIATION         | GO_POSITIVE_REGULATION_OF_CELL_DIFFERENTIATION         |               | 30   | 0.295 | 1,048 | 0.419        | 0.849        | 1             | 206               | tags=47%, list=36%, signal=69%  |
| GO_KINASE_ACTIVITY                                     | GO_KINASE_ACTIVITY                                     |               | 38   | 0.281 | 1,047 | 0.420        | 0.845        | 1             | 259               | tags=61%, list=46%, signal=104% |
| GO_NEGATIVE_REGULATION_OF_CELL_COMMUNICATION           | GO_NEGATIVE_REGULATION_OF_CELL_COMMUNICATION           |               | 44   | 0.277 | 1,045 | 0.417        | 0.848        | 1             | 284               | tags=61%, list=50%, signal=113% |
| GO_POSITIVE_REGULATION_OF_PROTEIN_METABOLIC_PROCESS    | GO_POSITIVE_REGULATION_OF_PROTEIN_METABOLIC_PROCESS    |               | 56   | 0.262 | 1,041 | 0.423        | 0.852        | 1             | 256               | tags=54%, list=45%, signal=88%  |
| GO_EMBRYO_DEVELOPMENT_ENDING_IN_BIRTH_OR_EGG_HATCHING  | GO_EMBRYO_DEVELOPMENT_ENDING_IN_BIRTH_OR_EGG_HATCHING  |               | 19   | 0.319 | 1,041 | 0.425        | 0.849        | 1             | 112               | tags=32%, list=20%, signal=38%  |
| GO_MITOCHONDRION                                       | GO_MITOCHONDRION                                       |               | 59   | 0.261 | 1,040 | 0.427        | 0.848        | 1             | 137               | tags=27%, list=24%, signal=32%  |
| GO_CARBOHYDRATE_BINDING                                | GO_CARBOHYDRATE_BINDING                                |               | 15   | 0.334 | 1,039 | 0.424        | 0.847        | 1             | 214               | tags=60%, list=38%, signal=94%  |
| GO_REGULATION_OF_HYDROLASE_ACTIVITY                    | GO_REGULATION_OF_HYDROLASE_ACTIVITY                    |               | 56   | 0.267 | 1,038 | 0.443        | 0.844        | 1             | 161               | tags=34%, list=28%, signal=43%  |
| GO_EMBRYO_DEVELOPMENT                                  | GO_EMBRYO_DEVELOPMENT                                  |               | 31   | 0.291 | 1,038 | 0.415        | 0.841        | 1             | 90                | tags=23%, list=16%, signal=25%  |
| GO_MULTICELLULAR_ORGANISMAL_HOMEOSTASIS                | GO_MULTICELLULAR_ORGANISMAL_HOMEOSTASIS                |               | 16   | 0.328 | 1,038 | 0.429        | 0.839        | 1             | 156               | tags=38%, list=27%, signal=50%  |
| GO_SMALL_MOLECULE_METABOLIC_PROCESS                    | GO_SMALL_MOLECULE_METABOLIC_PROCESS                    |               | 64   | 0.259 | 1,031 | 0.445        | 0.851        | 1             | 361               | tags=80%, list=63%, signal=193% |
| GO_NEURON_DEVELOPMENT                                  | GO_NEURON_DEVELOPMENT                                  |               | 25   | 0.297 | 1,029 | 0.432        | 0.851        | 1             | 100               | tags=24%, list=18%, signal=28%  |
| GO_CELL_LEADING_EDGE                                   | GO_CELL_LEADING_EDGE                                   |               | 30   | 0.287 | 1,027 | 0.429        | 0.852        | 1             | 199               | tags=43%, list=35%, signal=63%  |
| GO_PHOSPHORYLATION                                     | GO_PHOSPHORYLATION                                     |               | 51   | 0.263 | 1,026 | 0.445        | 0.852        | 1             | 256               | tags=57%, list=45%, signal=94%  |
| GO_POSITIVE_REGULATION_OF_RESPONSE_TO_STIMULUS         | GO_POSITIVE_REGULATION_OF_RESPONSE_TO_STIMULUS         |               | 63   | 0.259 | 1,025 | 0.461        | 0.850        | 1             | 210               | tags=43%, list=37%, signal=60%  |
| GO_PROTEIN_LOCALIZATION_TO_MEMBRANE                    | GO_PROTEIN_LOCALIZATION_TO_MEMBRANE                    |               | 15   | 0.326 | 1,025 | 0.413        | 0.847        | 1             | 248               | tags=67%, list=44%, signal=115% |
| GO_REGULATION_OF_NERVOUS_SYSTEM_DEVELOPMENT            | GO_REGULATION_OF_NERVOUS_SYSTEM_DEVELOPMENT            |               | 28   | 0.288 | 1,024 | 0.429        | 0.845        | 1             | 59                | tags=18%, list=10%, signal=19%  |
| GO_REGULATION_OF_CYTOSKELETON_ORGANIZATION             | GO_REGULATION_OF_CYTOSKELETON_ORGANIZATION             |               | 33   | 0.285 | 1,024 | 0.447        | 0.842        | 1             | 260               | tags=58%, list=46%, signal=100% |
| GO_POSITIVE_REGULATION_OF_BIOSYNTHETIC_PROCESS         | GO_POSITIVE_REGULATION_OF_BIOSYNTHETIC_PROCESS         |               | 62   | 0.258 | 1,023 | 0.466        | 0.840        | 1             | 185               | tags=40%, list=33%, signal=53%  |
| GO_PROTEIN_UBIQUITINATION                              | GO_PROTEIN_UBIQUITINATION                              |               | 24   | 0.299 | 1,020 | 0.45         | 0.843        | 1             | 28                | tags=13%, list=5%, signal=13%   |
| GO_REGULATION_OF_CELL_DEATH                            | GO_REGULATION_OF_CELL_DEATH                            |               | 60   | 0.259 | 1,020 | 0.479        | 0.840        | 1             | 206               | tags=42%, list=36%, signal=58%  |
| GO_BEHAVIOR                                            | GO_BEHAVIOR                                            |               | 15   | 0.325 | 1,015 | 0.429        | 0.847        | 1             | 336               | tags=87%, list=59%, signal=206% |
| GO_MEMBRANE_PROTEIN_COMPLEX                            | GO_MEMBRANE_PROTEIN_COMPLEX                            |               | 25   | 0.294 | 1,012 | 0.465        | 0.850        | 1             | 212               | tags=52%, list=37%, signal=79%  |
| GO_MONOCARBOXYLIC_ACID_METABOLIC_PROCESS               | GO_MONOCARBOXYLIC_ACID_METABOLIC_PROCESS               |               | 19   | 0.304 | 1,011 | 0.437        | 0.850        | 1             | 305               | tags=74%, list=54%, signal=154% |
| GO_ORGANOPHOSPHATE_METABOLIC_PROCESS                   | GO_ORGANOPHOSPHATE_METABOLIC_PROCESS                   |               | 39   | 0.267 | 1,010 | 0.466        | 0.847        | 1             | 361               | tags=82%, list=63%, signal=209% |
| GO_ACTIN_FILAMENT_ORGANIZATION                         | GO_ACTIN_FILAMENT_ORGANIZATION                         |               | 17   | 0.316 | 1,010 | 0.449        | 0.845        | 1             | 196               | tags=53%, list=34%, signal=78%  |
| GO_OXIDOREDUCTASE_ACTIVITY                             | GO_OXIDOREDUCTASE_ACTIVITY                             |               | 32   | 0.278 | 1,008 | 0.469        | 0.845        | 1             | 305               | tags=69%, list=54%, signal=140% |
| GO_CELL_CYCLE                                          | GO_CELL_CYCLE                                          |               | 54   | 0.259 | 1,005 | 0.474        | 0.848        | 1             | 0                 | tags=2%, list=0%, signal=2%     |
| GO_CYTOKINE_MEDIATED_SIGNALING_PATHWAY                 | GO_CYTOKINE_MEDIATED_SIGNALING_PATHWAY                 |               | 15   | 0.324 | 1,004 | 0.452        | 0.847        | 1             | 130               | tags=33%, list=23%, signal=42%  |
| GO_PROTEIN_KINASE_ACTIVITY                             | GO_PROTEIN_KINASE_ACTIVITY                             |               | 25   | 0.289 | 1,002 | 0.456        | 0.847        | 1             | 259               | tags=60%, list=46%, signal=105% |
| GO_MITOCHONDRIAL_PART                                  | GO_MITOCHONDRIAL_PART                                  |               | 23   | 0.290 | 1,002 | 0.469        | 0.844        | 1             | 137               | tags=35%, list=24%, signal=44%  |
| GO_POSTSYNAPSE                                         | GO_POSTSYNAPSE                                         |               | 15   | 0.322 | 1,001 | 0.469        | 0.843        | 1             | 312               | tags=80%, list=55%, signal=172% |
| GO_ORGANIC_ACID_METABOLIC_PROCESS                      | GO_ORGANIC_ACID_METABOLIC_PROCESS                      |               | 33   | 0.277 | 0,100 | 0.483        | 0.843        | 1             | 339               | tags=79%, list=60%, signal=184% |
| GO_NEGATIVE_REGULATION_OF_PHOSPHORUS_METABOLIC_PROCESS | GO_NEGATIVE_REGULATION_OF_PHOSPHORUS_METABOLIC_PROCESS |               | 19   | 0.301 | 0,995 | 0.469        | 0.850        | 1             | 181               | tags=42%, list=32%, signal=60%  |
| GO_NEGATIVE_REGULATION_OF_CATALYTIC_ACTIVITY           | GO_NEGATIVE_REGULATION_OF_CATALYTIC_ACTIVITY           |               | 28   | 0.283 | 0,995 | 0.487        | 0.846        | 1             | 302               | tags=68%, list=53%, signal=137% |
| GO_CELLULAR_RESPONSE_TO_STRESS                         | GO_CELLULAR_RESPONSE_TO_STRESS                         |               | 69   | 0.248 | 0,994 | 0.488        | 0.844        | 1             | 214               | tags=43%, list=38%, signal=61%  |
| GO_MACROMOLECULAR_COMPLEX_ASSEMBLY                     | GO_MACROMOLECULAR_COMPLEX_ASSEMBLY                     |               | 56   | 0.253 | 0,994 | 0.508        | 0.841        | 1             | 238               | tags=50%, list=42%, signal=77%  |

| NAME                                                             | GS<br> follow link to MSigDB                                     | GS<br>DETAILS | SIZE | ES    | NES   | NOM<br>p-val | FDR<br>q-val | FWER<br>p-val | RANK<br>AT<br>MAX | LEADING EDGE                    |
|------------------------------------------------------------------|------------------------------------------------------------------|---------------|------|-------|-------|--------------|--------------|---------------|-------------------|---------------------------------|
| GO_ORGANONITROGEN_COMPOUND_METABOLIC_PROCESS                     | GO_ORGANONITROGEN_COMPOUND_METABOLIC_PROCESS                     |               | 44   | 0.262 | 0.992 | 0.468        | 0.842        | 1             | 339               | tags=75%, list=60%, signal=171% |
| GO_REGULATION_OF_ORGANELLE_ORGANIZATION                          | GO_REGULATION_OF_ORGANELLE_ORGANIZATION                          |               | 66   | 0.248 | 0.991 | 0.501        | 0.842        | 1             | 251               | tags=52%, list=44%, signal=81%  |
| GO_REGULATION_OF_CELL_CYCLE_PHASE_TRANSITION                     | GO_REGULATION_OF_CELL_CYCLE_PHASE_TRANSITION                     |               | 18   | 0.309 | 0.990 | 0.486        | 0.840        | 1             | 248               | tags=61%, list=44%, signal=105% |
| GO_POSITIVE_REGULATION_OF_MAPK_CASCADE                           | GO_POSITIVE_REGULATION_OF_MAPK_CASCADE                           |               | 17   | 0.307 | 0.986 | 0.491        | 0.847        | 1             | 160               | tags=41%, list=28%, signal=56%  |
| GO_CELL_JUNCTION_ORGANIZATION                                    | GO_CELL_JUNCTION_ORGANIZATION                                    |               | 24   | 0.287 | 0.983 | 0.487        | 0.849        | 1             | 282               | tags=67%, list=50%, signal=127% |
| GO_SMALL_MOLECULE_BIOSYNTHETIC_PROCESS                           | GO_SMALL_MOLECULE_BIOSYNTHETIC_PROCESS                           |               | 22   | 0.285 | 0.981 | 0.489        | 0.850        | 1             | 346               | tags=82%, list=61%, signal=201% |
| GO_REGULATION_OF_PHOSPHORUS_METABOLIC_PROCESS                    | GO_REGULATION_OF_PHOSPHORUS_METABOLIC_PROCESS                    |               | 61   | 0.245 | 0.981 | 0.510        | 0.847        | 1             | 185               | tags=39%, list=33%, signal=52%  |
| GO_REGULATION_OF_RESPONSE_TO_STRESS                              | GO_REGULATION_OF_RESPONSE_TO_STRESS                              |               | 57   | 0.244 | 0.979 | 0.509        | 0.848        | 1             | 185               | tags=37%, list=33%, signal=49%  |
| GO_REGULATION_OF_DEFENSE_RESPONSE                                | GO_REGULATION_OF_DEFENSE_RESPONSE                                |               | 28   | 0.274 | 0.977 | 0.487        | 0.850        | 1             | 113               | tags=29%, list=20%, signal=34%  |
| GO_INTRACELLULAR_SIGNAL_TRANSDUCTION                             | GO_INTRACELLULAR_SIGNAL_TRANSDUCTION                             |               | 64   | 0.247 | 0.976 | 0.537        | 0.847        | 1             | 252               | tags=52%, list=44%, signal=82%  |
| GO_REGULATION_OF_BODY_FLUID_LEVELS                               | GO_REGULATION_OF_BODY_FLUID_LEVELS                               |               | 26   | 0.281 | 0.975 | 0.497        | 0.846        | 1             | 153               | tags=35%, list=27%, signal=45%  |
| GO_MACROMOLECULAR_COMPLEX_BINDING                                | GO_MACROMOLECULAR_COMPLEX_BINDING                                |               | 75   | 0.237 | 0.974 | 0.517        | 0.846        | 1             | 269               | tags=53%, list=47%, signal=88%  |
| GO_SPINDLE                                                       | GO_SPINDLE                                                       |               | 21   | 0.292 | 0.972 | 0.489        | 0.848        | 1             | 251               | tags=57%, list=44%, signal=98%  |
| GO_ORGANIC_HYDROXY_COMPOUND_METABOLIC_PROCESS                    | GO_ORGANIC_HYDROXY_COMPOUND_METABOLIC_PROCESS                    |               | 15   | 0.310 | 0.969 | 0.478        | 0.849        | 1             | 350               | tags=87%, list=62%, signal=219% |
| GO_CELL_SUBSTRATE_ADHESION                                       | GO_CELL_SUBSTRATE_ADHESION                                       |               | 15   | 0.312 | 0.966 | 0.511        | 0.852        | 1             | 266               | tags=67%, list=47%, signal=122% |
| GO_TRANSMEMBRANE_TRANSPORT                                       | GO_TRANSMEMBRANE_TRANSPORT                                       |               | 19   | 0.290 | 0.966 | 0.512        | 0.849        | 1             | 13                | tags=11%, list=2%, signal=10%   |
| GO_REGULATION_OF_MAPK_CASCADE                                    | GO_REGULATION_OF_MAPK_CASCADE                                    |               | 22   | 0.286 | 0.964 | 0.517        | 0.850        | 1             | 213               | tags=50%, list=37%, signal=77%  |
| GO_ENZYME_LINKED_RECEPTOR_PROTEIN_SIGNALING_PATHWAY              | GO_ENZYME_LINKED_RECEPTOR_PROTEIN_SIGNALING_PATHWAY              |               | 32   | 0.264 | 0.958 | 0.524        | 0.859        | 1             | 82                | tags=22%, list=14%, signal=24%  |
| GO_REGULATION_OF_INTRACELLULAR_TRANSPORT                         | GO_REGULATION_OF_INTRACELLULAR_TRANSPORT                         |               | 29   | 0.269 | 0.956 | 0.523        | 0.860        | 1             | 248               | tags=52%, list=44%, signal=87%  |
| GO_PROTEIN_HOMODIMERIZATION_ACTIVITY                             | GO_PROTEIN_HOMODIMERIZATION_ACTIVITY                             |               | 42   | 0.253 | 0.954 | 0.546        | 0.860        | 1             | 346               | tags=76%, list=61%, signal=180% |
| GO_LIPID_METABOLIC_PROCESS                                       | GO_LIPID_METABOLIC_PROCESS                                       |               | 38   | 0.256 | 0.952 | 0.537        | 0.863        | 1             | 193               | tags=42%, list=34%, signal=59%  |
| GO_REGULATION_OF_CYTOKINE_PRODUCTION                             | GO_REGULATION_OF_CYTOKINE_PRODUCTION                             |               | 28   | 0.264 | 0.949 | 0.522        | 0.865        | 1             | 131               | tags=29%, list=23%, signal=35%  |
| GO_TRANSPORTER_ACTIVITY                                          | GO_TRANSPORTER_ACTIVITY                                          |               | 22   | 0.281 | 0.949 | 0.503        | 0.862        | 1             | 26                | tags=14%, list=5%, signal=14%   |
| GO_PROTEIN_MODIFICATION_BY_SMALL_PROTEIN_CONJUGATION_OR_REMOVAL  | GO_PROTEIN_MODIFICATION_BY_SMALL_PROTEIN_CONJUGATION_OR_REMOVAL  |               | 27   | 0.268 | 0.946 | 0.529        | 0.865        | 1             | 28                | tags=11%, list=5%, signal=11%   |
| GO_REGULATION_OF_CELL_DEVELOPMENT                                | GO_REGULATION_OF_CELL_DEVELOPMENT                                |               | 35   | 0.258 | 0.944 | 0.533        | 0.866        | 1             | 59                | tags=17%, list=10%, signal=18%  |
| GO_RESPONSE_TO_RADIATION                                         | GO_RESPONSE_TO_RADIATION                                         |               | 21   | 0.284 | 0.944 | 0.528        | 0.863        | 1             | 256               | tags=57%, list=45%, signal=100% |
| GO_RESPONSE_TO_LIPID                                             | GO_RESPONSE_TO_LIPID                                             |               | 33   | 0.263 | 0.943 | 0.555        | 0.861        | 1             | 99                | tags=24%, list=17%, signal=28%  |
| GO_LIGASE_ACTIVITY                                               | GO_LIGASE_ACTIVITY                                               |               | 20   | 0.287 | 0.943 | 0.532        | 0.858        | 1             | 16                | tags=10%, list=3%, signal=10%   |
| GO_REGULATION_OF_CATABOLIC_PROCESS                               | GO_REGULATION_OF_CATABOLIC_PROCESS                               |               | 41   | 0.251 | 0.941 | 0.549        | 0.859        | 1             | 267               | tags=56%, list=47%, signal=98%  |
| GO_PEPTIDYL_AMINO_ACID_MODIFICATION                              | GO_PEPTIDYL_AMINO_ACID_MODIFICATION                              |               | 29   | 0.265 | 0.938 | 0.554        | 0.861        | 1             | 280               | tags=62%, list=49%, signal=116% |
| GO_NEGATIVE_REGULATION_OF_MOLECULAR_FUNCTION                     | GO_NEGATIVE_REGULATION_OF_MOLECULAR_FUNCTION                     |               | 44   | 0.242 | 0.937 | 0.572        | 0.861        | 1             | 319               | tags=68%, list=56%, signal=143% |
| GO_REGULATION_OF_CELLULAR_LOCALIZATION                           | GO_REGULATION_OF_CELLULAR_LOCALIZATION                           |               | 49   | 0.241 | 0.935 | 0.550        | 0.861        | 1             | 189               | tags=39%, list=33%, signal=53%  |
| GO_NUCLEAR_OUTER_MEMBRANE_ENDOPLASMIC_RETICULUM_MEMBRANE_NETWORK | GO_NUCLEAR_OUTER_MEMBRANE_ENDOPLASMIC_RETICULUM_MEMBRANE_NETWORK |               | 28   | 0.267 | 0.935 | 0.567        | 0.859        | 1             | 179               | tags=39%, list=31%, signal=54%  |
| GO_PROTEIN_DIMERIZATION_ACTIVITY                                 | GO_PROTEIN_DIMERIZATION_ACTIVITY                                 |               | 48   | 0.240 | 0.933 | 0.574        | 0.859        | 1             | 346               | tags=75%, list=61%, signal=175% |
| GO_CYTOPLASMIC_VESICLE_PART                                      | GO_CYTOPLASMIC_VESICLE_PART                                      |               | 25   | 0.270 | 0.932 | 0.547        | 0.857        | 1             | 84                | tags=24%, list=15%, signal=27%  |
| GO_NEGATIVE_REGULATION_OF_CELL_DEATH                             | GO_NEGATIVE_REGULATION_OF_CELL_DEATH                             |               | 39   | 0.250 | 0.931 | 0.576        | 0.857        | 1             | 206               | tags=44%, list=36%, signal=64%  |
| GO_RESPONSE_TO ABIOTIC STIMULUS                                  | GO_RESPONSE_TO ABIOTIC STIMULUS                                  |               | 48   | 0.241 | 0.929 | 0.579        | 0.857        | 1             | 310               | tags=65%, list=54%, signal=130% |

| NAME                                                                    | GS<br><br> follow link to MSigDB                                        | GS<br>DETAILS | SIZE | ES    | NES   | NOM<br>p-val | FDR<br>q-val | FWER<br>p-val | RANK<br>AT<br>MAX | LEADING EDGE                    |
|-------------------------------------------------------------------------|-------------------------------------------------------------------------|---------------|------|-------|-------|--------------|--------------|---------------|-------------------|---------------------------------|
| GO_CELLULAR_COMPONENT_DISASSEMBLY                                       | GO_CELLULAR_COMPONENT_DISASSEMBLY                                       |               | 26   | 0.266 | 0.926 | 0.555        | 0.861        | 1             | 203               | tags=46%, list=36%, signal=68%  |
| GO_MICROTUBULE_CYTOSKELETON_ORGANIZATION                                | GO_MICROTUBULE_CYTOSKELETON_ORGANIZATION                                |               | 17   | 0.290 | 0.925 | 0.532        | 0.860        | 1             | 199               | tags=47%, list=35%, signal=70%  |
| GO_POSITIVE_REGULATION_OF_CELLULAR_COMPONENT_ORGANIZATION               | GO_POSITIVE_REGULATION_OF_CELLULAR_COMPONENT_ORGANIZATION               |               | 50   | 0.235 | 0.922 | 0.589        | 0.862        | 1             | 189               | tags=38%, list=33%, signal=52%  |
| GO_CHROMOSOME                                                           | GO_CHROMOSOME                                                           |               | 29   | 0.262 | 0.921 | 0.559        | 0.861        | 1             | 236               | tags=52%, list=41%, signal=84%  |
| GO_RESPONSE_TO_DRUG                                                     | GO_RESPONSE_TO_DRUG                                                     |               | 16   | 0.294 | 0.921 | 0.569        | 0.858        | 1             | 185               | tags=44%, list=33%, signal=63%  |
| GO_POSITIVE_REGULATION_OF_HYDROLASE_ACTIVITY                            | GO_POSITIVE_REGULATION_OF_HYDROLASE_ACTIVITY                            |               | 38   | 0.248 | 0.919 | 0.575        | 0.858        | 1             | 121               | tags=26%, list=21%, signal=31%  |
| GO_PROTEIN_COMPLEX_BINDING                                              | GO_PROTEIN_COMPLEX_BINDING                                              |               | 63   | 0.230 | 0.919 | 0.599        | 0.856        | 1             | 260               | tags=51%, list=46%, signal=83%  |
| GO_POSITIVE_REGULATION_OF_INTRACELLULAR_TRANSPORT                       | GO_POSITIVE_REGULATION_OF_INTRACELLULAR_TRANSPORT                       |               | 19   | 0.286 | 0.918 | 0.538        | 0.855        | 1             | 248               | tags=58%, list=44%, signal=99%  |
| GO_ENDOPLASMIC_RETICULUM                                                | GO_ENDOPLASMIC_RETICULUM                                                |               | 49   | 0.237 | 0.918 | 0.574        | 0.853        | 1             | 179               | tags=35%, list=31%, signal=46%  |
| GO_POSITIVE_REGULATION_OF_MOLECULAR_FUNCTION                            | GO_POSITIVE_REGULATION_OF_MOLECULAR_FUNCTION                            |               | 72   | 0.227 | 0.918 | 0.615        | 0.850        | 1             | 206               | tags=39%, list=36%, signal=53%  |
| GO_ENDOPLASMIC_RETICULUM_PART                                           | GO_ENDOPLASMIC_RETICULUM_PART                                           |               | 37   | 0.249 | 0.916 | 0.593        | 0.850        | 1             | 179               | tags=38%, list=31%, signal=52%  |
| GO_MEMBRANE_MICRODOMAIN                                                 | GO_MEMBRANE_MICRODOMAIN                                                 |               | 16   | 0.293 | 0.912 | 0.548        | 0.855        | 1             | 215               | tags=50%, list=38%, signal=78%  |
| GO_ORGANELLE_LOCALIZATION                                               | GO_ORGANELLE_LOCALIZATION                                               |               | 21   | 0.276 | 0.903 | 0.563        | 0.868        | 1             | 30                | tags=14%, list=5%, signal=15%   |
| GO_ORGANONITROGEN_COMPOUND_BIOSYNTHETIC_PROCESS                         | GO_ORGANONITROGEN_COMPOUND_BIOSYNTHETIC_PROCESS                         |               | 25   | 0.261 | 0.901 | 0.586        | 0.869        | 1             | 339               | tags=76%, list=60%, signal=180% |
| GO_SINGLE_ORGANISM_CATABOLIC_PROCESS                                    | GO_SINGLE_ORGANISM_CATABOLIC_PROCESS                                    |               | 40   | 0.238 | 0.897 | 0.606        | 0.873        | 1             | 360               | tags=78%, list=63%, signal=196% |
| GO_TRANSFERASE_ACTIVITY_TRANSFERRING_PHOSPHORUS_CONTAINING_GROUPS       | GO_TRANSFERASE_ACTIVITY_TRANSFERRING_PHOSPHORUS_CONTAINING_GROUPS       |               | 47   | 0.233 | 0.897 | 0.604        | 0.871        | 1             | 259               | tags=55%, list=46%, signal=93%  |
| GO_ORGANELLE_SUBCOMPARTMENT                                             | GO_ORGANELLE_SUBCOMPARTMENT                                             |               | 15   | 0.286 | 0.895 | 0.586        | 0.871        | 1             | 33                | tags=13%, list=6%, signal=14%   |
| GO_CYTOPLASMIC_REGION                                                   | GO_CYTOPLASMIC_REGION                                                   |               | 26   | 0.257 | 0.889 | 0.606        | 0.880        | 1             | 60                | tags=19%, list=11%, signal=21%  |
| GO_IDENTICAL_PROTEIN_BINDING                                            | GO_IDENTICAL_PROTEIN_BINDING                                            |               | 71   | 0.218 | 0.888 | 0.67         | 0.878        | 1             | 325               | tags=66%, list=57%, signal=135% |
| GO_REGULATION_OF_IMMUNE_SYSTEM_PROCESS                                  | GO_REGULATION_OF_IMMUNE_SYSTEM_PROCESS                                  |               | 48   | 0.230 | 0.884 | 0.639        | 0.882        | 1             | 144               | tags=29%, list=25%, signal=36%  |
| GO_DEVELOPMENTAL_GROWTH                                                 | GO_DEVELOPMENTAL_GROWTH                                                 |               | 18   | 0.272 | 0.884 | 0.591        | 0.880        | 1             | 84                | tags=22%, list=15%, signal=25%  |
| GO_PROTEOLYSIS                                                          | GO_PROTEOLYSIS                                                          |               | 35   | 0.239 | 0.881 | 0.630        | 0.883        | 1             | 231               | tags=46%, list=41%, signal=72%  |
| GO_REGULATION_OF_CELLULAR_COMPONENT_BIOGENESIS                          | GO_REGULATION_OF_CELLULAR_COMPONENT_BIOGENESIS                          |               | 38   | 0.236 | 0.881 | 0.638        | 0.880        | 1             | 167               | tags=34%, list=29%, signal=45%  |
| KEGG_MAPK_SIGNALING_PATHWAY                                             | KEGG_MAPK_SIGNALING_PATHWAY                                             |               | 15   | 0.286 | 0.878 | 0.604        | 0.882        | 1             | 306               | tags=73%, list=54%, signal=154% |
| GO_NEGATIVE_REGULATION_OF_MULTICELLULAR_ORGANISMAL_PROCESS              | GO_NEGATIVE_REGULATION_OF_MULTICELLULAR_ORGANISMAL_PROCESS              |               | 28   | 0.247 | 0.873 | 0.634        | 0.887        | 1             | 302               | tags=64%, list=53%, signal=130% |
| GO_ENDOSOMAL_PART                                                       | GO_ENDOSOMAL_PART                                                       |               | 17   | 0.269 | 0.865 | 0.615        | 0.899        | 1             | 113               | tags=24%, list=20%, signal=28%  |
| GO_PHOSPHATE_CONTAINING_COMPOUND_METABOLIC_PROCESS                      | GO_PHOSPHATE_CONTAINING_COMPOUND_METABOLIC_PROCESS                      |               | 90   | 0.210 | 0.863 | 0.701        | 0.899        | 1             | 361               | tags=73%, list=63%, signal=169% |
| GO_CELL_PROJECTION_ORGANIZATION                                         | GO_CELL_PROJECTION_ORGANIZATION                                         |               | 46   | 0.228 | 0.859 | 0.668        | 0.903        | 1             | 31                | tags=11%, list=5%, signal=11%   |
| GO_NEGATIVE_REGULATION_OF_PROTEOLYSIS                                   | GO_NEGATIVE_REGULATION_OF_PROTEOLYSIS                                   |               | 15   | 0.282 | 0.859 | 0.626        | 0.900        | 1             | 181               | tags=40%, list=32%, signal=57%  |
| GO_GUANYL_NUCLEOTIDE_EXCHANGE_FACTOR_ACTIVITY                           | GO_GUANYL_NUCLEOTIDE_EXCHANGE_FACTOR_ACTIVITY                           |               | 15   | 0.277 | 0.856 | 0.630        | 0.902        | 1             | 31                | tags=13%, list=5%, signal=14%   |
| GO_POSITIVE_REGULATION_OF_TRANSCRIPTION_FROM_RNA_POLYMERASE_II_PROMOTER | GO_POSITIVE_REGULATION_OF_TRANSCRIPTION_FROM_RNA_POLYMERASE_II_PROMOTER |               | 27   | 0.239 | 0.855 | 0.638        | 0.902        | 1             | 200               | tags=44%, list=35%, signal=65%  |
| GO_VACUOLAR_PART                                                        | GO_VACUOLAR_PART                                                        |               | 20   | 0.257 | 0.850 | 0.651        | 0.906        | 1             | 124               | tags=25%, list=22%, signal=31%  |
| GO_REGULATION_OF_CELLULAR_RESPONSE_TO_STRESS                            | GO_REGULATION_OF_CELLULAR_RESPONSE_TO_STRESS                            |               | 28   | 0.238 | 0.846 | 0.652        | 0.910        | 1             | 267               | tags=54%, list=47%, signal=96%  |
| GO_REGULATION_OF_VESICLE_MEDIATED_TRANSPORT                             | GO_REGULATION_OF_VESICLE_MEDIATED_TRANSPORT                             |               | 19   | 0.257 | 0.843 | 0.645        | 0.914        | 1             | 325               | tags=74%, list=57%, signal=166% |
| GO_ENVELOPE                                                             | GO_ENVELOPE                                                             |               | 26   | 0.240 | 0.841 | 0.672        | 0.914        | 1             | 90                | tags=23%, list=16%, signal=26%  |
| REACTOME_METABOLISM_OF_LIPIDS_AND_LIPOPROTEINS                          | REACTOME_METABOLISM_OF_LIPIDS_AND_LIPOPROTEINS                          |               | 20   | 0.255 | 0.836 | 0.664        | 0.919        | 1             | 377               | tags=85%, list=66%, signal=243% |
| GO_POSITIVE_REGULATION_OF_CATABOLIC_PROCESS                             | GO_POSITIVE_REGULATION_OF_CATABOLIC_PROCESS                             |               | 22   | 0.245 | 0.835 | 0.661        | 0.918        | 1             | 256               | tags=55%, list=45%, signal=95%  |
| GO_IMMUNE_EFFECTOR_PROCESS                                              | GO_IMMUNE_EFFECTOR_PROCESS                                              |               | 20   | 0.246 | 0.834 | 0.658        | 0.916        | 1             | 256               | tags=55%, list=45%, signal=96%  |
| GO_PHOSPHOLIPID_BINDING                                                 | GO_PHOSPHOLIPID_BINDING                                                 |               | 18   | 0.257 | 0.833 | 0.668        | 0.914        | 1             | 84                | tags=22%, list=15%, signal=25%  |
| GO_POSITIVE_REGULATION_OF_CELL_DEVELOPMENT                              | GO_POSITIVE_REGULATION_OF_CELL_DEVELOPMENT                              |               | 20   | 0.243 | 0.833 | 0.687        | 0.912        | 1             | 59                | tags=15%, list=10%, signal=16%  |

| NAME                                                      | GS<br> follow link to MSigDB                              | GS<br>DETAILS | SIZE | ES    | NES   | NOM<br>p-val | FDR<br>q-val | FWER<br>p-val | RANK<br>AT<br>MAX | LEADING EDGE                        |
|-----------------------------------------------------------|-----------------------------------------------------------|---------------|------|-------|-------|--------------|--------------|---------------|-------------------|-------------------------------------|
| GO_MICROTUBULE_BASED_PROCESS                              | GO_MICROTUBULE_BASED_PROCESS                              |               | 29   | 0.233 | 0.832 | 0.672        | 0.911        | 1             | 327               | tags=69%, list=57%,<br>signal=134%  |
| GO_REGULATION_OF_RESPONSE_TO_EXTERNAL_STIMULUS            | GO_REGULATION_OF_RESPONSE_TO_EXTERNAL_STIMULUS            |               | 35   | 0.224 | 0.831 | 0.679        | 0.909        | 1             | 84                | tags=20%, list=15%, signal=22%      |
| GO_SINGLE_ORGANISM_CELLULAR_LOCALIZATION                  | GO_SINGLE_ORGANISM_CELLULAR_LOCALIZATION                  |               | 37   | 0.225 | 0.830 | 0.696        | 0.908        | 1             | 251               | tags=51%, list=44%, signal=86%      |
| GO_CELLULAR_LIPID_METABOLIC_PROCESS                       | GO_CELLULAR_LIPID_METABOLIC_PROCESS                       |               | 30   | 0.230 | 0.829 | 0.693        | 0.908        | 1             | 317               | tags=67%, list=56%,<br>signal=143%  |
| GO_MICROTUBULE_ORGANIZING_CENTER                          | GO_MICROTUBULE_ORGANIZING_CENTER                          |               | 27   | 0.236 | 0.828 | 0.683        | 0.906        | 1             | 201               | tags=44%, list=35%, signal=65%      |
| GO_REGULATION_OF_PROTEOLYSIS                              | GO_REGULATION_OF_PROTEOLYSIS                              |               | 30   | 0.230 | 0.827 | 0.681        | 0.906        | 1             | 259               | tags=50%, list=46%, signal=87%      |
| GO_CARBOHYDRATE_METABOLIC_PROCESS                         | GO_CARBOHYDRATE_METABOLIC_PROCESS                         |               | 25   | 0.240 | 0.820 | 0.686        | 0.913        | 1             | 309               | tags=68%, list=54%,<br>signal=142%  |
| GO_GROWTH                                                 | GO_GROWTH                                                 |               | 20   | 0.249 | 0.820 | 0.687        | 0.911        | 1             | 191               | tags=40%, list=34%, signal=58%      |
| GO_POSITIVE_REGULATION_OF_CELL_DEATH                      | GO_POSITIVE_REGULATION_OF_CELL_DEATH                      |               | 27   | 0.235 | 0.817 | 0.691        | 0.912        | 1             | 120               | tags=22%, list=21%, signal=27%      |
| GO_CATABOLIC_PROCESS                                      | GO_CATABOLIC_PROCESS                                      |               | 68   | 0.201 | 0.816 | 0.738        | 0.911        | 1             | 360               | tags=72%, list=63%,<br>signal=173%  |
| GO_MEMBRANE_ORGANIZATION                                  | GO_MEMBRANE_ORGANIZATION                                  |               | 36   | 0.221 | 0.816 | 0.696        | 0.910        | 1             | 250               | tags=53%, list=44%, signal=88%      |
| GO_SINGLE_ORGANISM_BIOSYNTHETIC_PROCESS                   | GO_SINGLE_ORGANISM_BIOSYNTHETIC_PROCESS                   |               | 51   | 0.203 | 0.801 | 0.737        | 0.929        | 1             | 241               | tags=47%, list=42%, signal=74%      |
| GO_POSITIVE_REGULATION_OF_ORGANELLE_ORGANIZATION          | GO_POSITIVE_REGULATION_OF_ORGANELLE_ORGANIZATION          |               | 29   | 0.227 | 0.799 | 0.681        | 0.929        | 1             | 90                | tags=21%, list=16%, signal=23%      |
| GO_ORGANOPHOSPHATE_BIOSYNTHETIC_PROCESS                   | GO_ORGANOPHOSPHATE_BIOSYNTHETIC_PROCESS                   |               | 25   | 0.232 | 0.797 | 0.714        | 0.930        | 1             | 337               | tags=72%, list=59%,<br>signal=169%  |
| GO_NEGATIVE_REGULATION_OF_PROTEIN_METABOLIC_PROCESS       | GO_NEGATIVE_REGULATION_OF_PROTEIN_METABOLIC_PROCESS       |               | 41   | 0.208 | 0.796 | 0.722        | 0.928        | 1             | 259               | tags=49%, list=46%, signal=83%      |
| GO_EXTRINSIC_COMPONENT_OF_MEMBRANE                        | GO_EXTRINSIC_COMPONENT_OF_MEMBRANE                        |               | 17   | 0.250 | 0.795 | 0.694        | 0.927        | 1             | 430               | tags=100%, list=76%,<br>signal=397% |
| GO_NUCLEOLUS                                              | GO_NUCLEOLUS                                              |               | 26   | 0.226 | 0.793 | 0.710        | 0.927        | 1             | 340               | tags=73%, list=60%,<br>signal=173%  |
| GO_GOLGI_VESICLE_TRANSPORT                                | GO_GOLGI_VESICLE_TRANSPORT                                |               | 22   | 0.234 | 0.791 | 0.697        | 0.928        | 1             | 72                | tags=18%, list=13%, signal=20%      |
| GO_CELLULAR_MACROMOLECULAR_COMPLEX_ASSEMBLY               | GO_CELLULAR_MACROMOLECULAR_COMPLEX_ASSEMBLY               |               | 24   | 0.227 | 0.783 | 0.719        | 0.937        | 1             | 52                | tags=13%, list=9%, signal=13%       |
| GO_REGULATION_OF_PROTEIN_MODIFICATION_PROCESS             | GO_REGULATION_OF_PROTEIN_MODIFICATION_PROCESS             |               | 60   | 0.197 | 0.782 | 0.780        | 0.934        | 1             | 263               | tags=50%, list=46%, signal=83%      |
| GO_RESPONSE_TO_EXTERNAL_STIMULUS                          | GO_RESPONSE_TO_EXTERNAL_STIMULUS                          |               | 53   | 0.202 | 0.780 | 0.772        | 0.935        | 1             | 276               | tags=53%, list=49%, signal=93%      |
| GO_PROTEIN_LOCALIZATION_TO_ORGANELLE                      | GO_PROTEIN_LOCALIZATION_TO_ORGANELLE                      |               | 16   | 0.256 | 0.780 | 0.730        | 0.933        | 1             | 76                | tags=19%, list=13%, signal=21%      |
| GO_NUCLEOBASE_CONTAINING_SMALL_MOLECULE_METABOLIC_PROCESS | GO_NUCLEOBASE_CONTAINING_SMALL_MOLECULE_METABOLIC_PROCESS |               | 21   | 0.234 | 0.774 | 0.733        | 0.938        | 1             | 390               | tags=86%, list=69%,<br>signal=262%  |
| GO_PLATELET_ACTIVATION                                    | GO_PLATELET_ACTIVATION                                    |               | 20   | 0.235 | 0.773 | 0.721        | 0.936        | 1             | 196               | tags=40%, list=34%, signal=59%      |
| REACTOME_HEMOSTASIS                                       | REACTOME_HEMOSTASIS                                       |               | 29   | 0.213 | 0.772 | 0.748        | 0.935        | 1             | 196               | tags=38%, list=34%, signal=55%      |
| GO_POSITIVE_REGULATION_OF_CELLULAR_COMPONENT_BIOGENESIS   | GO_POSITIVE_REGULATION_OF_CELLULAR_COMPONENT_BIOGENESIS   |               | 16   | 0.248 | 0.770 | 0.749        | 0.936        | 1             | 166               | tags=38%, list=29%, signal=51%      |
| GO_CELLULAR_RESPONSE_TO_LIPID                             | GO_CELLULAR_RESPONSE_TO_LIPID                             |               | 18   | 0.235 | 0.759 | 0.737        | 0.948        | 1             | 99                | tags=22%, list=17%, signal=26%      |
| REACTOME_IMMUNE_SYSTEM                                    | REACTOME_IMMUNE_SYSTEM                                    |               | 43   | 0.198 | 0.757 | 0.786        | 0.947        | 1             | 215               | tags=40%, list=38%, signal=59%      |
| GO_POSITIVE_REGULATION_OF_CATALYTIC_ACTIVITY              | GO_POSITIVE_REGULATION_OF_CATALYTIC_ACTIVITY              |               | 63   | 0.189 | 0.757 | 0.814        | 0.945        | 1             | 201               | tags=37%, list=35%, signal=50%      |
| GO_POSITIVE_REGULATION_OF_CELLULAR_PROTEIN_LOCALIZATION   | GO_POSITIVE_REGULATION_OF_CELLULAR_PROTEIN_LOCALIZATION   |               | 18   | 0.229 | 0.755 | 0.752        | 0.945        | 1             | 189               | tags=39%, list=33%, signal=56%      |
| GO_REGULATION_OF_NEURON_DIFFERENTIATION                   | GO_REGULATION_OF_NEURON_DIFFERENTIATION                   |               | 22   | 0.222 | 0.754 | 0.752        | 0.943        | 1             | 59                | tags=14%, list=10%, signal=15%      |
| GO_REGULATION_OF_MITOTIC_CELL_CYCLE                       | GO_REGULATION_OF_MITOTIC_CELL_CYCLE                       |               | 24   | 0.218 | 0.754 | 0.757        | 0.941        | 1             | 248               | tags=50%, list=44%, signal=85%      |
| GO_REGULATION_OF_IMMUNE_RESPONSE                          | GO_REGULATION_OF_IMMUNE_RESPONSE                          |               | 37   | 0.199 | 0.750 | 0.780        | 0.944        | 1             | 144               | tags=27%, list=25%, signal=34%      |
| GO_MITOCHONDRION_ORGANIZATION                             | GO_MITOCHONDRION_ORGANIZATION                             |               | 18   | 0.233 | 0.750 | 0.747        | 0.941        | 1             | 275               | tags=56%, list=48%,<br>signal=104%  |
| GO_INTRACELLULAR_VESICLE                                  | GO_INTRACELLULAR_VESICLE                                  |               | 56   | 0.191 | 0.749 | 0.792        | 0.939        | 1             | 324               | tags=63%, list=57%,<br>signal=131%  |
| GO_MOLECULAR_FUNCTION_REGULATOR                           | GO_MOLECULAR_FUNCTION_REGULATOR                           |               | 50   | 0.195 | 0.749 | 0.786        | 0.937        | 1             | 35                | tags=10%, list=6%, signal=10%       |
| GO_CELL_CORTEX                                            | GO_CELL_CORTEX                                            |               | 22   | 0.223 | 0.741 | 0.763        | 0.945        | 1             | 246               | tags=50%, list=43%, signal=85%      |
| GO_TUBULIN_BINDING                                        | GO_TUBULIN_BINDING                                        |               | 16   | 0.229 | 0.727 | 0.765        | 0.959        | 1             | 182               | tags=38%, list=32%, signal=54%      |
| GO_MACROMOLECULE_CATABOLIC_PROCESS                        | GO_MACROMOLECULE_CATABOLIC_PROCESS                        |               | 32   | 0.202 | 0.726 | 0.788        | 0.958        | 1             | 356               | tags=72%, list=63%,<br>signal=181%  |

| NAME                                                                         | GS<br>follow link to MSigDB                                                  | GS<br>DETAILS | SIZE | ES    | NES   | NOM<br>p-val | FDR<br>q-val | FWER<br>p-val | RANK<br>AT<br>MAX | LEADING EDGE                    |
|------------------------------------------------------------------------------|------------------------------------------------------------------------------|---------------|------|-------|-------|--------------|--------------|---------------|-------------------|---------------------------------|
| GO_REGULATION_OF_CYTOPLASMIC_TRANSPORT                                       | GO_REGULATION_OF_CYTOPLASMIC_TRANSPORT                                       |               | 19   | 0.221 | 0.719 | 0.789        | 0.963        | 1             | 284               | tags=58%, list=50%, signal=112% |
| GO_REGULATION_OF_APOPTOTIC_SIGNALING_PATHWAY                                 | GO_REGULATION_OF_APOPTOTIC_SIGNALING_PATHWAY                                 |               | 21   | 0.218 | 0.714 | 0.794        | 0.967        | 1             | 275               | tags=52%, list=48%, signal=98%  |
| GO_HYDROLASE_ACTIVITY_ACTING_ON_ACID_ANHYDRIDES                              | GO_HYDROLASE_ACTIVITY_ACTING_ON_ACID_ANHYDRIDES                              |               | 40   | 0.189 | 0.711 | 0.803        | 0.967        | 1             | 152               | tags=30%, list=27%, signal=38%  |
| GO_TRANSCRIPTION_FROM_RNA_POLYMERASE_II_PROMOTER                             | GO_TRANSCRIPTION_FROM_RNA_POLYMERASE_II_PROMOTER                             |               | 15   | 0.230 | 0.711 | 0.790        | 0.965        | 1             | 416               | tags=93%, list=73%, signal=338% |
| REACTOME_CLASS_I_MHC_MEDIATED_ANTIGEN_PROCESSING_PRESENTATION                | REACTOME_CLASS_I_MHC_MEDIATED_ANTIGEN_PROCESSING_PRESENTATION                |               | 16   | 0.227 | 0.709 | 0.802        | 0.965        | 1             | 250               | tags=50%, list=44%, signal=87%  |
| GO_COFACTOR_BINDING                                                          | GO_COFACTOR_BINDING                                                          |               | 20   | 0.211 | 0.704 | 0.794        | 0.968        | 1             | 35                | tags=10%, list=6%, signal=10%   |
| GO_VESICLE_MEDIATED_TRANSPORT                                                | GO_VESICLE_MEDIATED_TRANSPORT                                                |               | 63   | 0.174 | 0.687 | 0.878        | 0.984        | 1             | 210               | tags=37%, list=37%, signal=51%  |
| GO_NEGATIVE_REGULATION_OF_PHOSPHORYLATION                                    | GO_NEGATIVE_REGULATION_OF_PHOSPHORYLATION                                    |               | 16   | 0.216 | 0.680 | 0.827        | 0.989        | 1             | 248               | tags=50%, list=44%, signal=86%  |
| GO_CARBOHYDRATE_DERIVATIVE_METABOLIC_PROCESS                                 | GO_CARBOHYDRATE_DERIVATIVE_METABOLIC_PROCESS                                 |               | 33   | 0.189 | 0.679 | 0.847        | 0.987        | 1             | 435               | tags=91%, list=76%, signal=364% |
| GO_POSITIVE_REGULATION_OF_CELL_CYCLE                                         | GO_POSITIVE_REGULATION_OF_CELL_CYCLE                                         |               | 17   | 0.213 | 0.673 | 0.828        | 0.991        | 1             | 6                 | tags=6%, list=1%, signal=6%     |
| GO_REGULATION_OF_CELL_CYCLE                                                  | GO_REGULATION_OF_CELL_CYCLE                                                  |               | 37   | 0.181 | 0.671 | 0.841        | 0.991        | 1             | 256               | tags=46%, list=45%, signal=78%  |
| GO_DENDRITE                                                                  | GO_DENDRITE                                                                  |               | 17   | 0.210 | 0.670 | 0.837        | 0.988        | 1             | 74                | tags=18%, list=13%, signal=20%  |
| GO_REGULATION_OF_CELL_CYCLE_PROCESS                                          | GO_REGULATION_OF_CELL_CYCLE_PROCESS                                          |               | 23   | 0.198 | 0.670 | 0.827        | 0.986        | 1             | 248               | tags=48%, list=44%, signal=81%  |
| GO_TRANSMEMBRANE_RECEPTOR_PROTEIN_TYROSINE_KINASE_SIGNALING_PATHWAY          | GO_TRANSMEMBRANE_RECEPTOR_PROTEIN_TYROSINE_KINASE_SIGNALING_PATHWAY          |               | 22   | 0.197 | 0.665 | 0.834        | 0.989        | 1             | 184               | tags=36%, list=32%, signal=52%  |
| GO_CELLULAR_CATABOLIC_PROCESS                                                | GO_CELLULAR_CATABOLIC_PROCESS                                                |               | 49   | 0.169 | 0.660 | 0.886        | 0.991        | 1             | 360               | tags=69%, list=63%, signal=173% |
| GO_VACUOLAR_MEMBRANE                                                         | GO_VACUOLAR_MEMBRANE                                                         |               | 18   | 0.206 | 0.657 | 0.859        | 0.991        | 1             | 124               | tags=22%, list=22%, signal=28%  |
| GO_CELL_PART_MORPHOGENESIS                                                   | GO_CELL_PART_MORPHOGENESIS                                                   |               | 21   | 0.197 | 0.653 | 0.844        | 0.992        | 1             | 59                | tags=14%, list=10%, signal=15%  |
| GO_REGULATION_OF_PROTEIN_LOCALIZATION                                        | GO_REGULATION_OF_PROTEIN_LOCALIZATION                                        |               | 37   | 0.175 | 0.651 | 0.866        | 0.992        | 1             | 189               | tags=32%, list=33%, signal=45%  |
| GO_REGULATION_OF_GTPASE_ACTIVITY                                             | GO_REGULATION_OF_GTPASE_ACTIVITY                                             |               | 33   | 0.176 | 0.650 | 0.862        | 0.991        | 1             | 121               | tags=21%, list=21%, signal=25%  |
| GO_GOLGI_APPARATUS_PART                                                      | GO_GOLGI_APPARATUS_PART                                                      |               | 34   | 0.179 | 0.646 | 0.886        | 0.992        | 1             | 127               | tags=24%, list=22%, signal=28%  |
| GO_LYTIC_VACUOLE                                                             | GO_LYTIC_VACUOLE                                                             |               | 19   | 0.198 | 0.645 | 0.858        | 0.990        | 1             | 36                | tags=11%, list=6%, signal=11%   |
| GO_CENTROSOME                                                                | GO_CENTROSOME                                                                |               | 20   | 0.195 | 0.645 | 0.856        | 0.987        | 1             | 341               | tags=70%, list=60%, signal=169% |
| GO_ENDOCYTOSIS                                                               | GO_ENDOCYTOSIS                                                               |               | 23   | 0.189 | 0.643 | 0.863        | 0.987        | 1             | 407               | tags=83%, list=72%, signal=278% |
| GO_REGULATION_OF_CELL_PROJECTION_ORGANIZATION                                | GO_REGULATION_OF_CELL_PROJECTION_ORGANIZATION                                |               | 24   | 0.186 | 0.639 | 0.856        | 0.987        | 1             | 266               | tags=50%, list=47%, signal=90%  |
| REACTOME_CYTOKINE_SIGNALING_IN_IMMUNE_SYSTEM                                 | REACTOME_CYTOKINE_SIGNALING_IN_IMMUNE_SYSTEM                                 |               | 16   | 0.203 | 0.637 | 0.861        | 0.987        | 1             | 410               | tags=88%, list=72%, signal=304% |
| GO_PROTEIN_LOCALIZATION                                                      | GO_PROTEIN_LOCALIZATION                                                      |               | 73   | 0.157 | 0.636 | 0.922        | 0.985        | 1             | 127               | tags=22%, list=22%, signal=25%  |
| GO_AUTOPHAGY                                                                 | GO_AUTOPHAGY                                                                 |               | 17   | 0.198 | 0.636 | 0.845        | 0.983        | 1             | 52                | tags=12%, list=9%, signal=13%   |
| GO_NUCLEIC_ACID_BINDING_TRANSCRIPTION_FACTOR_ACTIVITY                        | GO_NUCLEIC_ACID_BINDING_TRANSCRIPTION_FACTOR_ACTIVITY                        |               | 19   | 0.195 | 0.635 | 0.867        | 0.981        | 1             | 289               | tags=58%, list=51%, signal=114% |
| GO_SMALL_GTPASE_MEDIATED_SIGNAL_TRANSDUCTION                                 | GO_SMALL_GTPASE_MEDIATED_SIGNAL_TRANSDUCTION                                 |               | 19   | 0.193 | 0.631 | 0.862        | 0.982        | 1             | 190               | tags=37%, list=33%, signal=53%  |
| GO_POSITIVE_REGULATION_OF_IMMUNE_RESPONSE                                    | GO_POSITIVE_REGULATION_OF_IMMUNE_RESPONSE                                    |               | 21   | 0.186 | 0.629 | 0.868        | 0.981        | 1             | 144               | tags=29%, list=25%, signal=37%  |
| GO_GUANYL_NUCLEOTIDE_BINDING                                                 | GO_GUANYL_NUCLEOTIDE_BINDING                                                 |               | 22   | 0.185 | 0.628 | 0.875        | 0.980        | 1             | 103               | tags=18%, list=18%, signal=21%  |
| GO_EMBRYONIC_MORPHOGENESIS                                                   | GO_EMBRYONIC_MORPHOGENESIS                                                   |               | 18   | 0.192 | 0.626 | 0.864        | 0.979        | 1             | 334               | tags=67%, list=59%, signal=156% |
| REACTOME_ADAPTIVE_IMMUNE_SYSTEM                                              | REACTOME_ADAPTIVE_IMMUNE_SYSTEM                                              |               | 27   | 0.179 | 0.625 | 0.861        | 0.977        | 1             | 250               | tags=44%, list=44%, signal=76%  |
| GO_SOMATODENDRITIC_COMPARTMENT                                               | GO_SOMATODENDRITIC_COMPARTMENT                                               |               | 20   | 0.188 | 0.625 | 0.885        | 0.975        | 1             | 99                | tags=20%, list=17%, signal=23%  |
| KEGG_FOCAL_ADHESION                                                          | KEGG_FOCAL_ADHESION                                                          |               | 23   | 0.176 | 0.613 | 0.885        | 0.982        | 1             | 423               | tags=87%, list=74%, signal=325% |
| GO_LIPID_BINDING                                                             | GO_LIPID_BINDING                                                             |               | 31   | 0.171 | 0.613 | 0.892        | 0.980        | 1             | 84                | tags=16%, list=15%, signal=18%  |
| GO_REGULATION_OF_KINASE_ACTIVITY                                             | GO_REGULATION_OF_KINASE_ACTIVITY                                             |               | 24   | 0.176 | 0.609 | 0.879        | 0.981        | 1             | 248               | tags=46%, list=44%, signal=78%  |
| GO_SIGNAL_TRANSDUCTION_BY_PROTEIN_PHOSPHORYLATION                            | GO_SIGNAL_TRANSDUCTION_BY_PROTEIN_PHOSPHORYLATION                            |               | 15   | 0.198 | 0.602 | 0.871        | 0.984        | 1             | 238               | tags=47%, list=42%, signal=78%  |
| GO_ESTABLISHMENT_OF_PROTEIN_LOCALIZATION                                     | GO_ESTABLISHMENT_OF_PROTEIN_LOCALIZATION                                     |               | 53   | 0.152 | 0.593 | 0.921        | 0.989        | 1             | 250               | tags=43%, list=44%, signal=70%  |
| GO_REGULATION_OF_SEQUENCE_SPECIFIC_DNA_BINDING_TRANSCRIPTION_FACTOR_ACTIVITY | GO_REGULATION_OF_SEQUENCE_SPECIFIC_DNA_BINDING_TRANSCRIPTION_FACTOR_ACTIVITY |               | 20   | 0.180 | 0.591 | 0.909        | 0.988        | 1             | 6                 | tags=5%, list=1%, signal=5%     |



| NAME                                                            | GS<br><a href="#">follow link to MSigDB</a>                     | GS<br>DETAILS | SIZE | ES    | NES   | NOM<br>p-val | FDR<br>q-val | FWER<br>p-val | RANK<br>AT<br>MAX | LEADING EDGE                    |
|-----------------------------------------------------------------|-----------------------------------------------------------------|---------------|------|-------|-------|--------------|--------------|---------------|-------------------|---------------------------------|
| GO_MITOTIC_CELL_CYCLE                                           | GO_MITOTIC_CELL_CYCLE                                           |               | 31   | 0.162 | 0.586 | 0.902        | 0.989        | 1             | 260               | tags=48%, list=46%, signal=84%  |
| GO_NEGATIVE_REGULATION_OF_PROTEIN_MODIFICATION_PROCESS          | GO_NEGATIVE_REGULATION_OF_PROTEIN_MODIFICATION_PROCESS          |               | 24   | 0.172 | 0.583 | 0.916        | 0.989        | 1             | 302               | tags=54%, list=53%, signal=111% |
| KEGG_PATHWAYS_IN_CANCER                                         | KEGG_PATHWAYS_IN_CANCER                                         |               | 20   | 0.175 | 0.582 | 0.905        | 0.987        | 1             | 356               | tags=70%, list=63%, signal=180% |
| GO_INTERSPECIES_INTERACTION_BETWEEN_ORGANISMS                   | GO_INTERSPECIES_INTERACTION_BETWEEN_ORGANISMS                   |               | 30   | 0.163 | 0.580 | 0.906        | 0.986        | 1             | 402               | tags=80%, list=71%, signal=258% |
| GO_CELL_CYCLE_PROCESS                                           | GO_CELL_CYCLE_PROCESS                                           |               | 47   | 0.149 | 0.576 | 0.932        | 0.986        | 1             | 260               | tags=47%, list=46%, signal=79%  |
| GO_PROTEIN_CATABOLIC_PROCESS                                    | GO_PROTEIN_CATABOLIC_PROCESS                                    |               | 25   | 0.164 | 0.576 | 0.906        | 0.984        | 1             | 231               | tags=40%, list=41%, signal=64%  |
| GO_REGULATION_OF_PROTEIN_SERINE_THREONINE_KINASE_ACTIVITY       | GO_REGULATION_OF_PROTEIN_SERINE_THREONINE_KINASE_ACTIVITY       |               | 16   | 0.183 | 0.575 | 0.926        | 0.982        | 1             | 230               | tags=44%, list=40%, signal=71%  |
| GO_REGULATION_OF_SECRETION                                      | GO_REGULATION_OF_SECRETION                                      |               | 20   | 0.174 | 0.574 | 0.930        | 0.980        | 1             | 187               | tags=35%, list=33%, signal=50%  |
| GO_ENDOSOME                                                     | GO_ENDOSOME                                                     |               | 24   | 0.165 | 0.571 | 0.898        | 0.980        | 1             | 33                | tags=8%, list=6%, signal=8%     |
| GO_ADENYL_NUCLEOTIDE_BINDING                                    | GO_ADENYL_NUCLEOTIDE_BINDING                                    |               | 63   | 0.141 | 0.569 | 0.931        | 0.979        | 1             | 342               | tags=62%, list=60%, signal=138% |
| GO_VACUOLE                                                      | GO_VACUOLE                                                      |               | 36   | 0.149 | 0.555 | 0.922        | 0.985        | 1             | 36                | tags=8%, list=6%, signal=8%     |
| GO_REGULATION_OF_CELLULAR_PROTEIN_LOCALIZATION                  | GO_REGULATION_OF_CELLULAR_PROTEIN_LOCALIZATION                  |               | 24   | 0.159 | 0.549 | 0.920        | 0.987        | 1             | 278               | tags=50%, list=49%, signal=94%  |
| GO_REGULATION_OF_NEURON_PROJECTION_DEVELOPMENT                  | GO_REGULATION_OF_NEURON_PROJECTION_DEVELOPMENT                  |               | 19   | 0.167 | 0.545 | 0.929        | 0.986        | 1             | 334               | tags=63%, list=59%, signal=148% |
| GO_INTRACELLULAR_PROTEIN_TRANSPORT                              | GO_INTRACELLULAR_PROTEIN_TRANSPORT                              |               | 28   | 0.152 | 0.542 | 0.935        | 0.986        | 1             | 212               | tags=36%, list=37%, signal=54%  |
| KEGG_REGULATION_OF_ACTIN_CYTOSKELETON                           | KEGG_REGULATION_OF_ACTIN_CYTOSKELETON                           |               | 22   | 0.157 | 0.541 | 0.956        | 0.984        | 1             | 246               | tags=45%, list=43%, signal=77%  |
| GO_GTPASE_ACTIVITY                                              | GO_GTPASE_ACTIVITY                                              |               | 16   | 0.169 | 0.538 | 0.917        | 0.984        | 1             | 273               | tags=50%, list=48%, signal=93%  |
| GO_CELLULAR_MACROMOLECULE_LOCALIZATION                          | GO_CELLULAR_MACROMOLECULE_LOCALIZATION                          |               | 50   | 0.138 | 0.536 | 0.945        | 0.982        | 1             | 282               | tags=48%, list=50%, signal=87%  |
| GO_REGULATION_OF_AUTOPHAGY                                      | GO_REGULATION_OF_AUTOPHAGY                                      |               | 18   | 0.164 | 0.526 | 0.946        | 0.985        | 1             | 267               | tags=50%, list=47%, signal=91%  |
| GO_REGULATION_OF_SMALL_GTPASE_MEDIATED_SIGNAL_TRANSDUCTION      | GO_REGULATION_OF_SMALL_GTPASE_MEDIATED_SIGNAL_TRANSDUCTION      |               | 18   | 0.162 | 0.525 | 0.937        | 0.984        | 1             | 199               | tags=33%, list=35%, signal=50%  |
| GO_MITOTIC_NUCLEAR_DIVISION                                     | GO_MITOTIC_NUCLEAR_DIVISION                                     |               | 23   | 0.150 | 0.505 | 0.948        | 0.991        | 1             | 201               | tags=35%, list=35%, signal=52%  |
| GO_RIBONUCLEOTIDE_BINDING                                       | GO_RIBONUCLEOTIDE_BINDING                                       |               | 83   | 0.124 | 0.505 | 0.979        | 0.989        | 1             | 52                | tags=10%, list=9%, signal=9%    |
| GO_REGULATION_OF_TRANSFERASE_ACTIVITY                           | GO_REGULATION_OF_TRANSFERASE_ACTIVITY                           |               | 30   | 0.139 | 0.498 | 0.947        | 0.990        | 1             | 300               | tags=53%, list=53%, signal=107% |
| GO_DNA_METABOLIC_PROCESS                                        | GO_DNA_METABOLIC_PROCESS                                        |               | 25   | 0.142 | 0.493 | 0.967        | 0.989        | 1             | 185               | tags=32%, list=33%, signal=45%  |
| GO_RNA_PROCESSING                                               | GO_RNA_PROCESSING                                               |               | 18   | 0.152 | 0.493 | 0.955        | 0.987        | 1             | 229               | tags=39%, list=40%, signal=63%  |
| GO_PHOSPHORIC_ESTER_HYDROLASE_ACTIVITY                          | GO_PHOSPHORIC_ESTER_HYDROLASE_ACTIVITY                          |               | 19   | 0.150 | 0.487 | 0.965        | 0.987        | 1             | 447               | tags=89%, list=79%, signal=403% |
| GO_HYDROLASE_ACTIVITY_ACTING_ON_ESTER_BONDS                     | GO_HYDROLASE_ACTIVITY_ACTING_ON_ESTER_BONDS                     |               | 29   | 0.130 | 0.469 | 0.968        | 0.992        | 1             | 460               | tags=90%, list=81%, signal=444% |
| GO_ENZYME_REGULATOR_ACTIVITY                                    | GO_ENZYME_REGULATOR_ACTIVITY                                    |               | 33   | 0.127 | 0.458 | 0.966        | 0.994        | 1             | 93                | tags=15%, list=16%, signal=17%  |
| GO_ORGANELLE_FISSION                                            | GO_ORGANELLE_FISSION                                            |               | 31   | 0.127 | 0.453 | 0.976        | 0.993        | 1             | 267               | tags=45%, list=47%, signal=80%  |
| REACTOME_PLATELET_ACTIVATION_SIGNALING_AND_AGGREGATION          | REACTOME_PLATELET_ACTIVATION_SIGNALING_AND_AGGREGATION          |               | 15   | 0.151 | 0.452 | 0.986        | 0.991        | 1             | 196               | tags=33%, list=34%, signal=50%  |
| GO_POSITIVE_REGULATION_OF_ESTABLISHMENT_OF_PROTEIN_LOCALIZATION | GO_POSITIVE_REGULATION_OF_ESTABLISHMENT_OF_PROTEIN_LOCALIZATION |               | 24   | 0.127 | 0.437 | 0.979        | 0.993        | 1             | 189               | tags=29%, list=33%, signal=42%  |
| GO_ESTABLISHMENT_OF_LOCALIZATION_IN_CELL                        | GO_ESTABLISHMENT_OF_LOCALIZATION_IN_CELL                        |               | 71   | 0.110 | 0.436 | 0.991        | 0.991        | 1             | 33                | tags=7%, list=6%, signal=7%     |
| GO_ACTIVATION_OF_IMMUNE_RESPONSE                                | GO_ACTIVATION_OF_IMMUNE_RESPONSE                                |               | 17   | 0.133 | 0.426 | 0.981        | 0.991        | 1             | 248               | tags=41%, list=44%, signal=71%  |
| GO_REGULATION_OF_PROTEIN_COMPLEX_ASSEMBLY                       | GO_REGULATION_OF_PROTEIN_COMPLEX_ASSEMBLY                       |               | 18   | 0.127 | 0.412 | 0.988        | 0.992        | 1             | 60                | tags=11%, list=11%, signal=12%  |
| GO_ENDOMEMBRANE_SYSTEM_ORGANIZATION                             | GO_ENDOMEMBRANE_SYSTEM_ORGANIZATION                             |               | 22   | 0.119 | 0.400 | 0.987        | 0.992        | 1             | 375               | tags=68%, list=66%, signal=192% |
| GO_ENZYME_ACTIVATOR_ACTIVITY                                    | GO_ENZYME_ACTIVATOR_ACTIVITY                                    |               | 16   | 0.127 | 0.394 | 0.990        | 0.991        | 1             | 199               | tags=31%, list=35%, signal=47%  |
